# Supplementary material for: ITAS: Integrated Transcript Annotation for Small RNA
Source: MDPI journal article supplement (doi:10.3390/ncrna8030030), 2022-05-02
Supplement: s1 [file s1]

**Supplemental Figure S1.** Top differentially expressed small RNA (sRNA) using Donkin et.al., 2016 data, processed with SPORTS vs integrated transcript annotation for small RNA (ITAS) based genome-alignment (bowtie + Rsubread) pipelines.

**Supplemental Figure S2.** Top differentially expressed sRNA using Ingerslev et.al., 2018 data, processed with SPORTS vs ITAS based genome-alignment (bowtie + Rsubread) pipelines.

**Supplemental Figure S3.** Top differentially expressed sRNA using Hua et.al., 2019 data, processed with SPORTS vs ITAS based genome-alignment (bowtie + Rsubread) pipelines.

**Supplemental Figure S4.** Top differentially expressed tRNA-derived small RNA (tsRNA) using Donkin et.al., 2016 data, processed by SPORTS vs ITAS based genome-alignment (bowtie + Rsubread + kallisto) pipelines.

**Supplemental Figure S5.** Top differentially expressed tsRNA using Ingerslev et.al., 2018 data, processed by SPORTS vs ITAS based genome-alignment (bowtie + Rsubread + kallisto) pipelines.

**Supplemental Figure S6.** Top differentially expressed tsRNA using Hua et.al., 2019 data, processed by ITAS based genome-alignment (bowtie + Rsubread + kallisto) pipeline. Using SPORTS pipeline, no differential expressed tsRNA were identified.

**Supplemental Table S1.** Differentially expressed sRNA using Donkin et.al., 2016 data, processed with SPORTS.

**Supplemental Table S2.** Differentially expressed tsRNA using Donkin et.al., 2016 data, processed with SPORTS.

**Supplemental Table S3.** Differentially expressed sRNA using Donkin et.al., 2016 data, processed with integrated transcript annotation for small RNA (ITAS) based genome-alignment (bowtie + Rsubread) pipeline.

**Supplemental Table S4.** Differentially expressed tsRNA using Donkin et.al., 2016 data, processed with ITAS based genome-alignment (bowtie + Rsubread + kallisto) pipeline.

**Supplemental Table S5.** Differentially expressed sRNA using Hua et.al., 2019 data, processed with SPORTS.

**Supplemental Table S6.** Differentially expressed sRNA using Hua et.al., 2019 data, processed with ITAS based genome-alignment (bowtie + Rsubread) pipeline.

**Supplemental Table S7.** Differentially expressed tsRNA using Hua et.al., 2019 data, processed with ITAS based genome-alignment (bowtie + Rsubread + kallisto) pipeline.

**Supplemental Table S8.** Differentially expressed sRNA using Ingerslev et.al., 2018 data, processed with SPORTS.

**Supplemental Table S9.** Differentially expressed tsRNA using Ingerslev et.al., 2018 data, processed with SPORTS.

**Supplemental Table S10.** Differentially expressed sRNA using Ingerslev et.al., 2018 data, processed with ITAS based genome-alignment (bowtie + Rsubread) pipeline.

**Supplemental Table S11.** Differentially expressed tsRNA using Ingerslev et.al., 2018 data, processed with ITAS based genome-alignment (bowtie + Rsubread + kallisto) pipeline.

**Supplemental Table S12.** Statistics on correction events in *Mus musculus* transcript entries: cases when both locus and sequence were present (Loci & Seq, no correction), only locus or only sequence (Loci only, Seq only, sequence or locus retrieved from genome); cases that required extending entry's locus, sequence or both (Ext Loci & Seq, Loci & Ext Seq, Ext Loci & Ext Seq).

**Supplemental Table S13.** Statistics on correction events in *Rattus norvegicus* transcript entries: cases when both locus and sequence were present (Loci & Seq, no correction), only locus or only sequence (Loci only, Seq only, sequence or locus retrieved from genome); cases that required extending entry's locus, sequence or both (Ext Loci & Seq, Loci & Ext Seq, Ext Loci & Ext Seq).

**Supplemental Table S14.** Statistics on correction events in *Drosophila melanogaster* transcript entries: cases when both locus and sequence were present (Loci & Seq, no correction), only locus or only sequence (Loci only, Seq only, sequence or locus retrieved from genome); cases that required extending entry's locus, sequence or both (Ext Loci & Seq, Loci & Ext Seq, Ext Loci & Ext Seq).

**Supplemental Table S15.** Statistics on correction events in *Caenorhabditis elegans* transcript entries: cases when both locus and sequence were present (Loci & Seq, no correction), only locus or only sequence (Loci only, Seq only, sequence or locus retrieved from genome); cases that required extending entry's locus, sequence or both (Ext Loci & Seq, Loci & Ext Seq, Ext Loci & Ext Seq).
