# Supplementary material for: ITAS: Integrated Transcript Annotation for Small RNA
Source: Noncoding RNA. 2022 May 2;8(3):30. doi: 10.3390/ncrna8030030 (PMC9150019; doi:10.3390/ncrna8030030)
Supplement: Supplementary file 1 [file ncrna-08-00030-s001.zip › ITAS_Supplemental_Tables_22022022.xlsx]

## Sheet: Table S1 Mus musculus
RNA type	Database	Loci & Seq	Loci only	Seq only	Ext Loci & Seq	Loci & Ext Seq	Ext Loci & Ext Seq
mature miRNA	miRBase	0	1035	0	1076	0	0
piRNA	piRNAdb	0	0	2	3429362	16	1
rRNA	UCSC	1512	0	0	653	0	0
tRNA	GtRNAdb	407	728	0	0	0	0
tRNA-derived	tRFdb	335	0	0	0	0	8

## Sheet: Table S2 Rattus norvegicus
RNA type	Database	Loci & Seq	Loci only	Seq only	Ext Loci & Seq	Loci & Ext Seq	Ext Loci & Ext Seq
mature miRNA	miRBase	0	401	10	409	0	0
piRNA	piRNAdb	26	0	312	3015204	847	211
rRNA	UCSC	14	0	0	224	0	36
tRNA	GtRNAdb	417	756	0	0	0	0

## Sheet: Table S3 Drosophila melanogast
RNA type	Database	Loci & Seq	Loci only	Seq only	Ext Loci & Ext Seq
mature miRNA	miRBase	120	239	0	122
piRNA	piRNAdb	248645	0	0	251891
rRNA	UCSC	48	0	377	68
tRNA	GtRNAdb	290	5	0	0
tRNA-derived	tRFdb	147	0	0	0

## Sheet: Table S4 Caenorhabditis elegan
RNA type	Database	Loci & Seq	Loci only	Seq only	Ext Loci & Ext Seq
mature miRNA	miRBase	107	221	0	242
piRNA	piRNAdb	7892	0	0	8102
rRNA	UCSC	84091	0	103963	0
tRNA	GtRNAdb	581	140	0	0
tRNA-derived	tRFdb	247	0	0	0

## Sheet: Table S5 sRNA Donkin, SPORTS 
	baseMean	log2FoldChange	lfcSE	stat	pvalue	padj
mature-tRNA-Ser-CGA	22.7231	-3.57443	0.767807	-4.65537	3.234e-06	0.00093461
hsa-mir-155	20.904	1.48109	0.457221	3.23933	0.00119813	0.173129
other-rRNA	34.9051	-3.0132	0.974948	-3.09063	0.00199734	0.192411
mature-mt_tRNA-Glu-TTC	4961.19	-0.657664	0.252732	-2.60222	0.00926234	0.669204
mature-mt_tRNA-Phe-GAA	75.4165	-0.644533	0.273713	-2.35478	0.0185337	0.814695
mature-mt_tRNA-Trp-TCA	33.9418	-0.696334	0.295716	-2.35474	0.0185358	0.814695
mature-mt_tRNA-Ala-TGC	37.5221	-0.723881	0.316489	-2.28723	0.0221827	0.814695
mature-mt_tRNA-Ser-TGA	1991.53	-3.30669	1.44971	-2.28094	0.0225521	0.814695
mature-tRNA-His-GTG	2766.81	-1.00333	0.458	-2.19069	0.0284745	0.914348
16S-rRNA	158854	-0.558652	0.264751	-2.1101	0.0348496	0.985921
mature-mt_tRNA-Ile-GAT	11.2165	-0.58267	0.295692	-1.97053	0.0487776	0.985921
12S-rRNA	127994	-0.545455	0.281567	-1.93721	0.0527193	0.985921
mature-mt_tRNA-Thr-TGT	1248.57	-0.931135	0.487058	-1.91175	0.0559077	0.985921
mature-mt_tRNA-His-GTG	1061.9	-0.502049	0.265656	-1.88985	0.058778	0.985921
hsa-mir-195	10.8509	0.61971	0.341433	1.81503	0.0695199	0.985921
mature-tRNA-Met-CAT	46.4108	-0.884814	0.492364	-1.79707	0.0723243	0.985921
hsa-mir-890	15.6931	0.703724	0.394977	1.78168	0.0748007	0.985921
mature-tRNA-Pro-TGG	3.33055	0.675725	0.402065	1.68064	0.0928336	0.985921
mature-mt_tRNA-Leu-TAA	8.94394	-0.580238	0.347274	-1.67084	0.0947536	0.985921
RNY5-YRNA	1364.55	-0.360973	0.216622	-1.66637	0.0956388	0.985921
mature-tRNA-Leu-CAG	8.16838	0.477026	0.294344	1.62064	0.105095	0.985921
mature-mt_tRNA-Gln-TTG	137.152	-0.47751	0.297188	-1.60676	0.108107	0.985921
mature-mt_tRNA-Lys-TTT	886.472	-0.370719	0.230931	-1.60532	0.108423	0.985921
mature-tRNA-Leu-TAG	19.2999	-0.560072	0.354918	-1.57803	0.114558	0.985921
mature-mt_tRNA-Pro-TGG	76.6389	-0.669362	0.425263	-1.574	0.115488	0.985921
hsa-mir-891a	1835.17	0.51144	0.326191	1.56792	0.1169	0.985921
mature-tRNA-Leu-AAG	77.0937	-0.571859	0.369587	-1.54729	0.121793	0.985921
mature-mt_tRNA-Tyr-GTA	462.391	-0.562637	0.364055	-1.54547	0.122232	0.985921
hsa-mir-17	100.145	0.286444	0.185387	1.54512	0.122318	0.985921
RNY4-YRNA	62379.9	-0.336045	0.227512	-1.47704	0.139665	0.985921
hsa-mir-455	15.5709	0.465341	0.320746	1.45081	0.146833	0.985921
mature-mt_tRNA-Val-TAC	3654.23	-0.754427	0.529675	-1.42432	0.154354	0.985921
hsa-mir-552	52.4335	-0.493856	0.349429	-1.41332	0.157561	0.985921
hsa-mir-139	10.5815	-0.489149	0.350453	-1.39576	0.162787	0.985921
hsa-mir-892a	178.597	0.45442	0.330524	1.37485	0.169179	0.985921
hsa-mir-320a	298.093	-0.649589	0.475213	-1.36694	0.171643	0.985921
mature-tRNA-Glu-CTC	1174.8	-0.375298	0.275855	-1.36049	0.173675	0.985921
mature-mt_tRNA-Asp-GTC	130.967	-1.36886	1.01528	-1.34826	0.177576	0.985921
hsa-mir-205	119.395	0.385389	0.288433	1.33615	0.181502	0.985921
mature-tRNA-Pro-AGG	3.87683	0.525323	0.393583	1.33472	0.181968	0.985921
hsa-mir-218-2	13.5735	0.441329	0.335641	1.31488	0.188549	0.985921
hsa-mir-1323	24.8077	-0.547627	0.420745	-1.30156	0.193065	0.985921
mature-tRNA-Cys-GCA	34.7486	-0.553839	0.428929	-1.29122	0.196629	0.985921
hsa-mir-218-1	13.6766	0.417086	0.323475	1.28939	0.197262	0.985921
RNY1-YRNA	33005.1	-0.365198	0.291064	-1.2547	0.209587	0.985921
hsa-mir-873	167.225	-0.371006	0.296013	-1.25335	0.21008	0.985921
hsa-mir-891b	40.2785	0.389351	0.312631	1.2454	0.212986	0.985921
mature-mt_tRNA-Leu-TAG	11.4385	-0.783879	0.63743	-1.22975	0.218791	0.985921
mature-tRNA-Lys-TTT	155.75	0.336612	0.273741	1.22967	0.218821	0.985921
mature-tRNA-Leu-TAA	116.629	-1.44924	1.18927	-1.2186	0.222997	0.985921
hsa-mir-222	55.1023	0.347655	0.288796	1.20381	0.228663	0.985921
hsa-mir-7-1	136.807	0.33544	0.281589	1.19124	0.23356	0.985921
hsa-mir-7154	15.6184	-0.404623	0.341689	-1.18418	0.236341	0.985921
hsa-mir-200a	1750.72	0.309235	0.262449	1.17827	0.238691	0.985921
hsa-mir-7-2	131.395	0.331804	0.283309	1.17117	0.241529	0.985921
hsa-mir-7-3	129.132	0.329808	0.283963	1.16145	0.24546	0.985921
mature-tRNA-Asp-GTC	2169.8	-0.465522	0.40239	-1.15689	0.247316	0.985921
hsa-mir-892c	20.2994	0.492308	0.42594	1.15582	0.247756	0.985921
hsa-mir-199b	14.1193	-0.434545	0.378867	-1.14696	0.251398	0.985921
mature-tRNA-Gln-CTG	1559.64	-0.407744	0.358025	-1.13887	0.254756	0.985921
hsa-mir-127	37.6467	-0.379818	0.337835	-1.12427	0.260898	0.985921
mature-mt_tRNA-Met-CAT	101.299	-0.293875	0.261595	-1.12339	0.26127	0.985921
hsa-mir-1307	43.3954	-0.368472	0.33277	-1.10729	0.26817	0.985921
5.8S-rRNA	20.7304	-0.473667	0.428154	-1.1063	0.268597	0.985921
mature-tRNA-Gly-CCC	217.679	0.284086	0.257208	1.1045	0.269378	0.985921
hsa-mir-1273f	19.478	-0.388692	0.358447	-1.08438	0.278197	0.985921
hsa-mir-29c	64.4547	0.258791	0.239201	1.0819	0.279298	0.985921
hsa-mir-501	25.7883	0.280042	0.259578	1.07884	0.280661	0.985921
hsa-mir-625	48.6981	-0.387655	0.361731	-1.07167	0.28387	0.985921
hsa-mir-522	13.3311	-0.365974	0.342534	-1.06843	0.285326	0.985921
hsa-mir-103a-2	316.482	0.158726	0.149701	1.06029	0.289012	0.985921
hsa-mir-499a	222.626	-0.404091	0.386548	-1.04538	0.295846	0.985921
hsa-mir-141	122.477	0.290563	0.280331	1.0365	0.299969	0.985921
hsa-mir-103a-1	314.386	0.154156	0.149903	1.02837	0.303774	0.985921
mature-tRNA-Lys-CTT	60.311	0.390609	0.383735	1.01791	0.308719	0.985921
hsa-mir-509-1	11.169	0.423636	0.425509	0.995597	0.319446	0.985921
hsa-mir-509-2	11.169	0.423636	0.425509	0.995597	0.319446	0.985921
mature-tRNA-Val-AAC	88.52	-0.397327	0.399897	-0.993573	0.320431	0.985921
hsa-mir-28	313.212	-0.170757	0.174398	-0.979123	0.327519	0.985921
hsa-mir-888	205.09	0.362541	0.373201	0.971438	0.33133	0.985921
mature-tRNA-Leu-CAA	23.6122	-0.309905	0.321373	-0.964314	0.334889	0.985921
hsa-mir-30b	177.776	0.222342	0.231904	0.958768	0.337676	0.985921
hsa-mir-582	12.3194	0.27586	0.289285	0.953594	0.340289	0.985921
mature-tRNA-iMet-CAT	50.8415	0.330292	0.347093	0.951595	0.341302	0.985921
hsa-mir-660	68.5217	0.254748	0.269725	0.944473	0.344928	0.985921
mature-tRNA-Ser-GCT	49.1847	-0.263489	0.280696	-0.938698	0.347886	0.985921
mature-tRNA-Val-CAC	110.186	-0.366361	0.393952	-0.929963	0.35239	0.985921
hsa-mir-128-1	33.9396	-0.253648	0.274572	-0.923795	0.355593	0.985921
hsa-mir-151a	220.017	0.134195	0.145761	0.920648	0.357234	0.985921
hsa-mir-328	10.468	-0.304271	0.334194	-0.91046	0.36258	0.985921
hsa-mir-335	91.7587	-0.29238	0.325471	-0.89833	0.36901	0.985921
hsa-mir-221	150.946	0.267231	0.302001	0.884868	0.376228	0.985921
hsa-mir-320b-2	29.1186	-0.373129	0.422065	-0.884056	0.376666	0.985921
hsa-mir-320b-1	28.9351	-0.370724	0.420878	-0.880833	0.378408	0.985921
hsa-mir-215	103.378	0.311719	0.355157	0.877692	0.380111	0.985921
hsa-mir-143	10.6036	-0.293455	0.334518	-0.877246	0.380353	0.985921
hsa-mir-132	116.528	0.250737	0.286025	0.876628	0.380689	0.985921
hsa-mir-128-2	23.7264	-0.227783	0.262107	-0.869046	0.384822	0.985921
hsa-mir-425	149.387	0.174541	0.202406	0.862333	0.388504	0.985921
hsa-mir-29a	755.503	0.249709	0.291467	0.856732	0.391593	0.985921
mature-tRNA-Phe-GAA	28.2486	0.319098	0.373713	0.853856	0.393185	0.985921
hsa-mir-193a	71.2371	-0.252469	0.305602	-0.826135	0.408728	0.985921
hsa-mir-126	23.0098	-0.218446	0.265558	-0.822592	0.41074	0.985921
mature-tRNA-Ile-AAT	43.9904	0.350621	0.427409	0.82034	0.412022	0.985921
mature-mt_tRNA-Arg-TCG	52.8636	-0.44191	0.5421	-0.815181	0.414969	0.985921
hsa-mir-182	484.144	0.131164	0.162169	0.808808	0.418626	0.985921
hsa-mir-146b	579.485	0.153031	0.190263	0.804313	0.421216	0.985921
hsa-mir-381	29.655	0.242458	0.30695	0.789892	0.429591	0.985921
hsa-mir-1246	131.321	0.543724	0.693973	0.783495	0.433337	0.985921
hsa-mir-1273e	17.6237	-0.302314	0.394588	-0.766152	0.443586	0.985921
hsa-mir-146a	64.7337	-0.240823	0.31547	-0.763379	0.445238	0.985921
hsa-mir-26a-1	496.043	0.242107	0.318429	0.760317	0.447065	0.985921
mature-tRNA-Ala-TGC	114.606	-0.269516	0.356607	-0.75578	0.449781	0.985921
hsa-mir-514a-1	33.0781	0.33211	0.439568	0.755537	0.449927	0.985921
hsa-mir-514a-2	33.0781	0.33211	0.439568	0.755537	0.449927	0.985921
hsa-mir-514a-3	33.0781	0.33211	0.439568	0.755537	0.449927	0.985921
hsa-mir-34c	7524.06	0.235151	0.312935	0.751436	0.45239	0.985921
mature-tRNA-Thr-TGT	13.1487	0.238263	0.317966	0.749336	0.453655	0.985921
hsa-mir-26a-2	497.459	0.236169	0.317692	0.74339	0.457245	0.985921
hsa-mir-3654	10.021	-0.3028	0.40909	-0.740179	0.459191	0.985921
hsa-mir-372	53.2352	0.283275	0.383469	0.738715	0.46008	0.985921
hsa-mir-15b	53.8808	-0.246536	0.345347	-0.71388	0.475301	0.985921
hsa-mir-192	233.906	0.193357	0.275195	0.702619	0.482293	0.985921
mature-tRNA-Glu-TTC	10751	-0.237215	0.339214	-0.699309	0.484359	0.985921
hsa-mir-197	10.7126	0.182928	0.265109	0.69001	0.490188	0.985921
hsa-mir-194-1	59.335	0.196976	0.288565	0.682607	0.494855	0.985921
hsa-mir-519a-1	14.4321	-0.23641	0.351288	-0.672979	0.50096	0.985921
hsa-mir-27b	367.134	0.180097	0.270096	0.666791	0.504906	0.985921
hsa-mir-101-2	727.448	0.126955	0.191497	0.662959	0.507357	0.985921
hsa-mir-592	16.7869	0.293557	0.445368	0.659134	0.50981	0.985921
hsa-mir-101-1	698.912	0.125786	0.191998	0.655144	0.512375	0.985921
hsa-mir-339	40.5088	-0.17802	0.271752	-0.655081	0.512415	0.985921
hsa-mir-486-2	16.9339	-0.219409	0.335401	-0.654168	0.513003	0.985921
hsa-mir-486-1	14.8307	-0.196552	0.304244	-0.646034	0.518257	0.985921
hsa-mir-183	176.35	0.124435	0.195876	0.635274	0.52525	0.985921
hsa-mir-93	195.412	0.131362	0.209084	0.628277	0.529823	0.985921
hsa-mir-19a	18.3879	0.19157	0.307676	0.622634	0.533525	0.985921
hsa-mir-96	43.6574	0.165809	0.269157	0.616029	0.537875	0.985921
hsa-mir-125b-2	576.445	0.106768	0.173991	0.613642	0.539452	0.985921
hsa-mir-10b	3447.13	0.142771	0.240564	0.593485	0.552857	0.985921
hsa-mir-200b	1903.65	0.176656	0.300149	0.588562	0.556155	0.985921
hsa-mir-125b-1	548.047	0.103211	0.175401	0.58843	0.556244	0.985921
hsa-mir-5096	15.7754	-0.181934	0.310437	-0.586058	0.557836	0.985921
hsa-mir-3925	10.2042	-0.216394	0.369872	-0.58505	0.558514	0.985921
hsa-mir-22	2114.7	-0.166034	0.285318	-0.581926	0.560617	0.985921
hsa-mir-107	34.2704	0.11003	0.189659	0.580147	0.561816	0.985921
hsa-mir-152	358.646	0.172461	0.298886	0.577012	0.563932	0.985921
hsa-mir-296	26.0505	0.143478	0.253518	0.565946	0.571431	0.985921
mature-tRNA-Gly-GCC	18.0215	-0.171279	0.305595	-0.560477	0.575154	0.985921
hsa-mir-508	21.9749	0.2156	0.38957	0.553429	0.579969	0.985921
hsa-mir-31	52.8663	0.139647	0.253228	0.551468	0.581313	0.985921
hsa-mir-429	257.566	0.18978	0.345256	0.549681	0.582538	0.985921
hsa-mir-520a	49.0631	0.196033	0.356662	0.549633	0.582571	0.985921
hsa-mir-4443	35.1639	-0.324437	0.593172	-0.546952	0.584412	0.985921
mature-tRNA-Ala-CGC	62.4182	-0.186412	0.341307	-0.546171	0.584948	0.985921
hsa-mir-378a	84.6665	-0.226802	0.418934	-0.541378	0.588247	0.985921
mature-mt_tRNA-Asn-GTT	16.2828	-0.167521	0.316192	-0.529809	0.596244	0.985921
hsa-mir-7641-1	51.3399	0.182795	0.354792	0.515219	0.6064	0.985921
hsa-mir-23b	91.6189	0.124943	0.249704	0.500365	0.616818	0.985921
hsa-let-7d	56.3497	-0.165284	0.332233	-0.497494	0.618841	0.985921
hsa-mir-23a	101.461	-0.108829	0.220277	-0.494056	0.621267	0.985921
hsa-mir-484	36.329	0.163186	0.333247	0.489685	0.624357	0.985921
hsa-mir-125a	187.174	0.105335	0.220653	0.477379	0.633092	0.985921
hsa-mir-4419a	61.4589	-0.149165	0.316416	-0.471421	0.63734	0.985921
hsa-mir-122	1213.59	-0.13835	0.299295	-0.462253	0.6439	0.985921
hsa-mir-30d	1372.76	0.0982041	0.216726	0.453126	0.650458	0.985921
hsa-mir-149	70.3241	-0.158343	0.350813	-0.451361	0.651729	0.985921
hsa-mir-100	1033.45	-0.0788931	0.176415	-0.447202	0.654729	0.985921
45S-rRNA	99090.1	0.0642264	0.144377	0.444853	0.656426	0.985921
hsa-mir-99b	354.181	-0.0842393	0.19076	-0.441599	0.658779	0.985921
hsa-mir-423	737.054	-0.108449	0.245696	-0.441395	0.658927	0.985921
hsa-mir-191	1203.04	0.0712155	0.163213	0.436334	0.662595	0.985921
hsa-mir-106b	131.107	0.0608228	0.140762	0.432098	0.66567	0.985921
mature-tRNA-Val-TAC	97.4153	0.0935417	0.222279	0.420829	0.67388	0.985921
hsa-mir-375	2578.22	-0.115783	0.281885	-0.410745	0.68126	0.985921
mature-tRNA-Tyr-GTA	347.753	-0.146946	0.358276	-0.410147	0.681698	0.985921
hsa-mir-210	36.0178	-0.155194	0.379762	-0.408662	0.682787	0.985921
hsa-mir-518e	24.6774	-0.186853	0.459075	-0.40702	0.683993	0.985921
mature-tRNA-SeC-TCA	12.8466	0.126318	0.311165	0.405952	0.684778	0.985921
hsa-mir-2110	27.217	-0.157726	0.391421	-0.402957	0.68698	0.985921
mature-tRNA-Gln-TTG	15.9471	-0.103535	0.261834	-0.395421	0.692532	0.985921
hsa-mir-148b	277.827	0.0810975	0.207512	0.390809	0.695938	0.985921
hsa-mir-532	172.928	0.0830026	0.213271	0.389188	0.697137	0.985921
hsa-mir-98	17.2285	0.131778	0.340895	0.386565	0.699078	0.985921
hsa-mir-20a	329.61	0.13735	0.361439	0.380008	0.70394	0.985921
hsa-mir-449a	173.994	0.13079	0.359378	0.363935	0.715906	0.985921
mature-tRNA-Thr-AGT	18.7649	-0.124488	0.351527	-0.354137	0.723237	0.985921
hsa-let-7i	225.82	0.0744337	0.223242	0.333422	0.738816	0.985921
hsa-mir-25	482.216	0.0863369	0.267267	0.323037	0.746668	0.985921
hsa-mir-1303	125.35	0.0700441	0.217009	0.322771	0.746869	0.985921
hsa-mir-20b	104.55	0.109317	0.351871	0.310672	0.75605	0.985921
hsa-mir-140	249.357	-0.0576125	0.187795	-0.306783	0.759008	0.985921
hsa-mir-516b-2	47.8313	0.10216	0.334279	0.305613	0.7599	0.985921
hsa-mir-342	36.0955	-0.0569839	0.189246	-0.30111	0.76333	0.985921
hsa-mir-29b-2	31.765	0.0903245	0.314755	0.286967	0.774137	0.985921
hsa-mir-200c	1533.43	0.101924	0.360044	0.283088	0.777109	0.985921
hsa-let-7f-2	571.975	-0.115754	0.416347	-0.278024	0.780994	0.985921
hsa-mir-16-2	265.709	-0.104953	0.384548	-0.272926	0.78491	0.985921
mature-tRNA-Thr-CGT	44.659	-0.100268	0.37643	-0.266367	0.789957	0.985921
hsa-mir-365a	9.78292	0.0752416	0.289495	0.259907	0.794936	0.985921
hsa-mir-24-2	88.6859	0.0606325	0.23416	0.258936	0.795685	0.985921
hsa-mir-378c	22.525	-0.135445	0.527469	-0.256783	0.797346	0.985921
hsa-mir-29b-1	28.1755	0.0879317	0.350117	0.251149	0.801699	0.985921
hsa-mir-181a-2	22.7177	0.0808636	0.32244	0.250786	0.801979	0.985921
hsa-mir-19b-2	99.3594	0.0853974	0.341652	0.249955	0.802623	0.985921
hsa-let-7f-1	532.785	-0.103351	0.413926	-0.249685	0.802831	0.985921
mature-tRNA-Arg-TCT	30.7412	0.0910386	0.365369	0.249169	0.80323	0.985921
hsa-mir-92a-1	264.156	-0.081394	0.328239	-0.247972	0.804156	0.985921
hsa-mir-516b-1	46.9261	0.0819035	0.331426	0.247125	0.804812	0.985921
hsa-mir-30c-2	187.204	0.0799615	0.325513	0.245647	0.805955	0.985921
hsa-mir-10a	2598.43	-0.060266	0.245561	-0.245422	0.806129	0.985921
hsa-mir-148a	6934.94	0.0706091	0.290032	0.243453	0.807655	0.985921
hsa-mir-21	4809.99	0.0587569	0.243762	0.241042	0.809523	0.985921
hsa-mir-331	8.51795	0.0787418	0.327148	0.240692	0.809794	0.985921
hsa-mir-16-1	153.251	0.0845831	0.353083	0.239556	0.810675	0.985921
hsa-mir-30c-1	179.518	0.0852689	0.360698	0.236399	0.813123	0.985921
hsa-let-7c	665.951	-0.0660247	0.281828	-0.234273	0.814773	0.985921
hsa-mir-19b-1	97.9458	0.0785226	0.344974	0.227619	0.819943	0.985921
hsa-mir-130b	13.4884	0.0744163	0.32715	0.227469	0.820059	0.985921
hsa-mir-374a	22.3035	-0.0949703	0.418209	-0.227088	0.820355	0.985921
mature-tRNA-Gly-TCC	42.7482	-0.0583672	0.259267	-0.225124	0.821883	0.985921
hsa-mir-9-3	67.5545	-0.0717104	0.33855	-0.211816	0.83225	0.985921
18S-rRNA	2.17122e+06	-0.0508904	0.245896	-0.206959	0.836042	0.985921
hsa-mir-574	54.9634	0.0670451	0.32786	0.204493	0.837968	0.985921
mature-tRNA-Ile-TAT	65.0597	0.0617604	0.307778	0.200665	0.84096	0.985921
hsa-mir-9-2	67.7195	-0.0663233	0.337337	-0.196609	0.844134	0.985921
mature-tRNA-Trp-CCA	117.542	-0.0683479	0.35189	-0.194231	0.845995	0.985921
hsa-mir-9-1	67.795	-0.0643546	0.337303	-0.190792	0.848689	0.985921
hsa-let-7g	1199.35	0.0567373	0.29921	0.189623	0.849604	0.985921
hsa-mir-184	28.7553	0.0610334	0.33167	0.184018	0.853999	0.985921
28S-rRNA	4.46468e+06	-0.0513915	0.279835	-0.183649	0.854289	0.985921
hsa-mir-92a-2	222.397	-0.0586134	0.325381	-0.180138	0.857045	0.985921
hsa-let-7a-2	653.554	-0.0652435	0.37589	-0.173571	0.862203	0.985921
hsa-let-7a-1	661.474	-0.0643351	0.376098	-0.17106	0.864177	0.985921
hsa-mir-24-1	88.4713	0.0397293	0.233088	0.170448	0.864658	0.985921
hsa-let-7a-3	660.235	-0.0627113	0.375464	-0.167023	0.867352	0.985921
hsa-mir-340	167.618	-0.054484	0.332843	-0.163693	0.869973	0.985921
hsa-mir-361	104.814	-0.0312918	0.193465	-0.161744	0.871507	0.985921
hsa-mir-15a	11.2826	-0.0502403	0.314607	-0.159692	0.873123	0.985921
hsa-mir-203a	131.582	0.0358979	0.233603	0.15367	0.87787	0.985921
mature-tRNA-Arg-CCT	63.6098	-0.0550595	0.361725	-0.152214	0.879018	0.985921
hsa-mir-34b	208.384	-0.0406835	0.26839	-0.151584	0.879515	0.985921
hsa-mir-194-2	75.6792	0.0427283	0.284635	0.150116	0.880673	0.985921
hsa-mir-185	110.583	-0.0493186	0.328712	-0.150036	0.880736	0.985921
hsa-mir-509-3	41.1452	0.0454519	0.304443	0.149295	0.881321	0.985921
hsa-mir-744	86.0671	-0.0464262	0.328836	-0.141183	0.887725	0.985921
hsa-mir-135a-2	82.6202	0.0424613	0.305335	0.139064	0.889399	0.985921
mature-tRNA-Arg-CCG	60.2591	-0.0489803	0.353554	-0.138537	0.889816	0.985921
hsa-mir-664a	21.4114	0.0338568	0.248438	0.136279	0.891601	0.985921
hsa-mir-99a	5746.69	-0.0312794	0.238748	-0.131014	0.895764	0.985921
5S-rRNA	923318	-0.0365073	0.279928	-0.130417	0.896237	0.985921
hsa-mir-106a	150.832	0.0351226	0.272053	0.129102	0.897277	0.985921
hsa-mir-652	11.5116	0.0411247	0.325636	0.12629	0.899502	0.985921
mature-tRNA-Ser-AGA	38.2795	-0.0316265	0.252676	-0.125167	0.900392	0.985921
hsa-mir-32	12.2735	-0.0385585	0.323185	-0.119308	0.905031	0.985921
hsa-mir-3940	13.0619	0.0488247	0.41293	0.11824	0.905878	0.985921
mature-mt_tRNA-Ser-GCT	17.8216	-0.0440487	0.375916	-0.117177	0.90672	0.985921
hsa-mir-150	10.6532	-0.0383428	0.334102	-0.114764	0.908632	0.985921
hsa-mir-1273g	57.6745	-0.0338456	0.31338	-0.108002	0.913994	0.985921
hsa-mir-30e	482.222	-0.0193953	0.182702	-0.106158	0.915457	0.985921
hsa-mir-181c	10.544	0.0316481	0.298359	0.106074	0.915524	0.985921
hsa-mir-1273a	244.139	0.0267046	0.2535	0.105343	0.916103	0.985921
hsa-mir-363	740.052	0.0250716	0.238516	0.105115	0.916285	0.985921
mature-tRNA-Arg-ACG	63.3644	-0.0398167	0.381155	-0.104463	0.916802	0.985921
hsa-mir-516a-1	28.8411	0.0429397	0.421723	0.10182	0.9189	0.985921
hsa-mir-516a-2	28.8411	0.0429397	0.421723	0.10182	0.9189	0.985921
hsa-mir-374b	46.2254	0.0472796	0.481102	0.0982736	0.921715	0.985921
hsa-let-7e	62.9612	0.0353661	0.360022	0.0982332	0.921747	0.985921
hsa-mir-500a	27.9809	0.0287396	0.292996	0.0980888	0.921862	0.985921
hsa-mir-190b	29.0821	0.0365463	0.45446	0.0804171	0.935906	0.985921
hsa-mir-629	103.05	0.0273483	0.414811	0.0659297	0.947434	0.985921
hsa-mir-26b	340.423	-0.026515	0.403897	-0.0656479	0.947658	0.985921
hsa-mir-411	15.6935	-0.0241024	0.401039	-0.0600998	0.952076	0.985921
mature-tRNA-Asn-GTT	28.502	0.0182946	0.31661	0.0577828	0.953922	0.985921
hsa-mir-135a-1	59.3944	0.0238121	0.417098	0.0570899	0.954474	0.985921
mature-tRNA-Ser-TGA	41.1858	-0.0128933	0.259261	-0.0497309	0.960337	0.985921
hsa-mir-186	145.521	-0.0158906	0.322619	-0.0492549	0.960716	0.985921
hsa-mir-548ad	9.38944	-0.0195663	0.420066	-0.0465792	0.962849	0.985921
hsa-mir-30a	1577.93	0.00851024	0.18953	0.0449018	0.964186	0.985921
hsa-mir-204	18.2945	-0.0112132	0.286797	-0.0390979	0.968812	0.985921
hsa-mir-769	192.721	0.0130361	0.377761	0.0345088	0.972471	0.985921
mature-tRNA-Arg-TCG	56.3287	0.00965067	0.303285	0.0318205	0.974615	0.985921
hsa-mir-181a-1	20.3435	0.00928806	0.322387	0.0288103	0.977016	0.985921
hsa-let-7b	1253.59	-0.00911893	0.324628	-0.0280904	0.97759	0.985921
hsa-mir-365b	9.69863	0.00736329	0.302814	0.0243162	0.9806	0.985921
mature-tRNA-Ala-AGC	56.1606	-0.00595592	0.282701	-0.0210679	0.983191	0.985921
RNY3-YRNA	11363.3	0.00482942	0.251632	0.0191924	0.984688	0.985921
hsa-mir-27a	90.7324	-0.00562731	0.296225	-0.0189967	0.984844	0.985921
hsa-mir-5683	16.8798	0.0082171	0.465659	0.0176462	0.985921	0.985921

## Sheet: Table S6 tsRNA Donkin, SPORTS
	baseMean	log2FoldChange	lfcSE	stat	pvalue	padj
mature-tRNA-Ile-AAT_5_end	65.0666	0.704176	0.224773	3.13284	0.00173125	0.0986369
mature-mt_tRNA-Glu-TTC_CCA_end	2183.38	-0.677052	0.220108	-3.07599	0.00209804	0.0986369
mature-mt_tRNA-Ala-TGC_5_end	4104.11	-0.977618	0.319684	-3.05807	0.00222764	0.0986369
mature-tRNA-Ile-GAT_5_end	18.1512	0.639235	0.218773	2.92191	0.00347887	0.0986369
mature-mt_tRNA-Phe-GAA_CCA_end	38.292	-0.966734	0.33286	-2.90432	0.00368048	0.0986369
mature-tRNA-iMet-CAT_5_end	413.233	-0.776187	0.304265	-2.55102	0.0107408	0.197114
mature-tRNA-Asn-GTT_3_end	94.7197	0.965128	0.385926	2.50081	0.0123909	0.197114
mature-mt_tRNA-Trp-TCA_3_end	40.7762	-1.01669	0.416461	-2.44126	0.0146362	0.197114
mature-tRNA-Lys-TTT_3_end	112.152	0.932149	0.381996	2.4402	0.014679	0.197114
mature-mt_tRNA-Phe-GAA_3_end	32.7826	-0.836275	0.342814	-2.43944	0.01471	0.197114
mature-tRNA-Thr-TGT_3_end	24.4269	0.523495	0.228629	2.28971	0.0220382	0.252094
mature-mt_tRNA-Leu-TAA_5_end	945.587	-0.714545	0.323301	-2.21016	0.0270944	0.252094
mature-mt_tRNA-Trp-TCA_5_end	97.2754	-0.909206	0.412228	-2.20559	0.0274128	0.252094
mature-mt_tRNA-Phe-GAA_5_end	78.638	-1.03189	0.471846	-2.18693	0.0287475	0.252094
mature-mt_tRNA-Ala-TGC_CCA_end	18.8572	-0.730004	0.338003	-2.15976	0.0307915	0.252094
mature-tRNA-Lys-CTT_3_end	122.821	0.971946	0.455346	2.13452	0.0328003	0.252094
mature-mt_tRNA-Glu-TTC_5_end	873.544	-0.66161	0.310443	-2.13118	0.0330742	0.252094
mature-mt_tRNA-Ile-GAT_5_end	36.4913	-0.769522	0.362692	-2.1217	0.0338634	0.252094
mature-mt_tRNA-Ser-TGA_5_end	3317.9	-0.624997	0.311998	-2.00321	0.0451547	0.318459
mature-mt_tRNA-Asn-GTT_5_end	120.689	-0.856693	0.444453	-1.92752	0.0539148	0.361229
mature-mt_tRNA-Glu-TTC_3_end	2833.29	-0.546893	0.289978	-1.88598	0.0592971	0.378372
mature-tRNA-Gln-TTG_CCA_end	13.6006	-0.657278	0.369018	-1.78115	0.0748874	0.456132
mature-tRNA-Glu-CTC_CCA_end	554.226	-0.595682	0.342039	-1.74156	0.0815853	0.475323
mature-tRNA-Leu-CAG_5_end	324.952	-0.413669	0.250205	-1.65332	0.0982656	0.534549
mature-mt_tRNA-Val-TAC_5_end	254.439	-0.751459	0.479263	-1.56795	0.116893	0.534549
mature-mt_tRNA-Trp-TCA_CCA_end	17.2792	-0.525726	0.337093	-1.55959	0.118858	0.534549
mature-tRNA-Ala-TGC_5_end	2476.03	0.247487	0.160988	1.5373	0.124221	0.534549
mature-tRNA-Leu-AAG_5_end	3859.17	-0.334554	0.218232	-1.53302	0.125271	0.534549
mature-tRNA-Ser-GCT_CCA_end	33.155	-0.397124	0.260104	-1.52679	0.126814	0.534549
mature-tRNA-Arg-ACG_3_end	98.1605	0.414149	0.271843	1.52349	0.127637	0.534549
mature-mt_tRNA-Met-CAT_5_end	643.209	-0.531745	0.353111	-1.50588	0.132097	0.534549
mature-tRNA-Leu-TAG_5_end	953.996	-0.313703	0.208682	-1.50326	0.132772	0.534549
mature-mt_tRNA-Thr-TGT_CCA_end	972.072	-0.722809	0.484927	-1.49055	0.136079	0.534549
mature-tRNA-Val-AAC_3_end	15.5526	0.34415	0.231892	1.48409	0.137784	0.534549
mature-tRNA-Phe-GAA_3_end	29.7636	0.4468	0.304702	1.46635	0.142553	0.534549
mature-mt_tRNA-His-GTG_3_end	100.722	-0.571973	0.391099	-1.46248	0.14361	0.534549
mature-tRNA-Val-CAC_3_end	20.8705	0.306276	0.213045	1.43761	0.150544	0.545212
mature-mt_tRNA-Lys-TTT_5_end	8571.2	-0.467713	0.335889	-1.39246	0.163782	0.577547
mature-tRNA-Ile-AAT_CCA_end	20.0376	0.484327	0.357245	1.35573	0.175186	0.601921
mature-mt_tRNA-Met-CAT_CCA_end	37.3114	-0.41897	0.319482	-1.3114	0.189722	0.624362
mature-mt_tRNA-Thr-TGT_3_end	208.893	-0.629966	0.485928	-1.29642	0.194831	0.624362
mature-mt_tRNA-Met-CAT_3_end	28.236	-0.526564	0.406955	-1.29391	0.195696	0.624362
mature-mt_tRNA-Val-TAC_CCA_end	2177.89	-0.820999	0.650798	-1.26153	0.207119	0.641201
mature-tRNA-Cys-GCA_CCA_end	16.3279	-0.392721	0.313657	-1.25207	0.210544	0.641201
mature-tRNA-Phe-GAA_CCA_end	12.418	0.430292	0.352847	1.21949	0.22266	0.651124
mature-tRNA-Ala-TGC_3_end	33.8233	0.447973	0.370556	1.20892	0.226694	0.651124
mature-tRNA-Thr-TGT_CCA_end	11.468	-0.529629	0.440216	-1.20311	0.228933	0.651124
mature-mt_tRNA-Gln-TTG_5_end	13006.6	-0.471132	0.397486	-1.18528	0.235906	0.651124
mature-tRNA-Val-TAC_CCA_end	32.3301	0.2602	0.220554	1.17976	0.238097	0.651124
mature-mt_tRNA-His-GTG_CCA_end	574.616	-0.376757	0.322978	-1.16651	0.243409	0.652336
mature-tRNA-Thr-CGT_CCA_end	16.2669	-0.250991	0.223374	-1.12364	0.261167	0.659885
mature-tRNA-Gly-CCC_CCA_end	162.806	0.460815	0.411057	1.12105	0.262266	0.659885
mature-mt_tRNA-Tyr-GTA_5_end	136.265	-0.518699	0.465206	-1.11499	0.264855	0.659885
mature-tRNA-Lys-TTT_5_end	5212.93	0.226944	0.203995	1.1125	0.265924	0.659885
mature-tRNA-Lys-CTT_5_end	10492.1	-0.224255	0.213682	-1.04948	0.293957	0.716187
mature-tRNA-Ala-AGC_CCA_end	17.9014	0.2416	0.233609	1.03421	0.301039	0.719341
mature-tRNA-Pro-AGG_5_end	17.5074	-0.305113	0.300344	-1.01588	0.309687	0.719341
mature-tRNA-Gln-TTG_3_end	38.8141	0.149851	0.148018	1.01238	0.311357	0.719341
mature-tRNA-Asp-GTC_3_end	2455.83	-0.32512	0.32556	-0.99865	0.317964	0.722156
mature-tRNA-Ala-CGC_3_end	12.5773	0.29424	0.306724	0.959297	0.337409	0.753547
mature-tRNA-Ala-CGC_5_end	2067.56	0.147021	0.155497	0.945493	0.344407	0.756566
mature-tRNA-Glu-CTC_3_end	481.291	-0.261791	0.283534	-0.923313	0.355844	0.762343
mature-tRNA-Glu-CTC_5_end	73662.3	-0.245513	0.26733	-0.91839	0.358415	0.762343
mature-tRNA-Trp-CCA_3_end	43.2075	0.245043	0.270679	0.905292	0.365311	0.76487
mature-tRNA-Leu-CAA_5_end	50.8181	-0.493901	0.555995	-0.888318	0.37437	0.768103
mature-tRNA-Arg-CCG_3_end	33.7603	0.329847	0.374402	0.880997	0.378319	0.768103
mature-tRNA-Ser-TGA_5_end	452.872	0.112813	0.13188	0.855417	0.39232	0.78464
mature-tRNA-Thr-AGT_CCA_end	12.2515	0.200696	0.24231	0.828264	0.407521	0.786438
mature-mt_tRNA-Thr-TGT_5_end	45.2045	-0.358047	0.44447	-0.80556	0.420496	0.786438
mature-tRNA-Leu-TAG_CCA_end	7.5137	-0.238017	0.295543	-0.805354	0.420615	0.786438
mature-tRNA-Met-CAT_3_end	47.705	-0.47695	0.594258	-0.802598	0.422207	0.786438
mature-mt_tRNA-Arg-TCG_5_end	334.204	-0.423738	0.533657	-0.794027	0.42718	0.786438
mature-tRNA-Arg-ACG_5_end	37.426	0.206736	0.261071	0.791877	0.428432	0.786438
mature-tRNA-Ile-TAT_CCA_end	8.33584	0.263251	0.35185	0.748192	0.454344	0.822632
mature-tRNA-Gly-GCC_3_end	17.9768	-0.205233	0.27804	-0.738142	0.460428	0.822632
mature-tRNA-Asn-GTT_5_end	30.6233	0.218999	0.3015	0.726366	0.467614	0.824478
mature-tRNA-Ala-AGC_3_end	16.4084	0.186681	0.264054	0.706981	0.479578	0.824976
mature-tRNA-Arg-TCG_CCA_end	26.5854	0.160427	0.232225	0.690823	0.489677	0.824976
mature-tRNA-Thr-CGT_3_end	17.3478	0.219339	0.319371	0.686784	0.492219	0.824976
mature-tRNA-Trp-CCA_CCA_end	30.0348	0.201684	0.298088	0.676593	0.498664	0.824976
mature-tRNA-Arg-TCT_3_end	22.6759	0.460315	0.682488	0.674466	0.500015	0.824976
mature-tRNA-Ser-AGA_CCA_end	23.8402	-0.137246	0.205797	-0.6669	0.504836	0.824976
mature-mt_tRNA-Lys-TTT_CCA_end	583.696	-0.261414	0.398602	-0.655827	0.511935	0.826498
mature-tRNA-Glu-TTC_3_end	822.868	-0.12329	0.195066	-0.632045	0.527358	0.834351
mature-tRNA-Ser-AGA_5_end	1007.13	0.126103	0.201807	0.624868	0.532058	0.834351
mature-tRNA-Gly-TCC_5_end	832.161	-0.139001	0.224317	-0.619664	0.535479	0.834351
mature-tRNA-Glu-TTC_5_end	8267.47	-0.185653	0.327266	-0.567285	0.570521	0.86731
mature-tRNA-Pro-TGG_5_end	17.9912	-0.155969	0.275563	-0.566003	0.571392	0.86731
mature-tRNA-Glu-TTC_CCA_end	7091.94	0.170373	0.304692	0.559165	0.576049	0.86731
mature-tRNA-Thr-TGT_5_end	33.636	0.116207	0.216108	0.537728	0.590765	0.879583
mature-tRNA-His-GTG_5_end	1899.44	-0.197426	0.386887	-0.510293	0.609846	0.898015
mature-tRNA-Arg-CCT_3_end	49.3553	0.172766	0.402694	0.429027	0.667904	0.940836
mature-tRNA-Asp-GTC_5_end	429.616	-0.144651	0.346692	-0.417232	0.676509	0.940836
mature-tRNA-Tyr-GTA_5_end	71.0368	-0.148938	0.360639	-0.412982	0.679619	0.940836
mature-tRNA-Leu-AAG_CCA_end	28.122	-0.119785	0.292833	-0.409058	0.682497	0.940836
mature-tRNA-Arg-ACG_CCA_end	25.5922	0.0973747	0.243934	0.399184	0.689758	0.940836
mature-tRNA-Gln-CTG_5_end	171.314	0.118316	0.311487	0.379841	0.704063	0.940836
mature-tRNA-Ser-GCT_5_end	1315.36	0.0706589	0.189179	0.373502	0.708775	0.940836
mature-tRNA-Val-CAC_5_end	4486.42	0.333822	0.898812	0.371403	0.710337	0.940836
mature-mt_tRNA-Pro-TGG_CCA_end	18.6935	-0.115549	0.316835	-0.364697	0.715337	0.940836
mature-tRNA-Leu-AAG_3_end	13.0728	0.0757746	0.212828	0.356037	0.721813	0.940836
mature-tRNA-Asp-GTC_CCA_end	505.558	0.135212	0.38668	0.349674	0.726583	0.940836
mature-tRNA-Trp-CCA_5_end	19.9035	0.0937482	0.2688	0.348766	0.727265	0.940836
mature-tRNA-iMet-CAT_CCA_end	23.1597	0.120551	0.349568	0.344859	0.730201	0.940836
mature-tRNA-Val-AAC_CCA_end	73.2094	-0.0848609	0.312055	-0.271942	0.785666	0.953977
mature-tRNA-Leu-TAA_5_end	77.0758	-0.0671903	0.26345	-0.25504	0.798692	0.953977
mature-tRNA-Gly-TCC_CCA_end	24.1269	0.058529	0.236783	0.247184	0.804766	0.953977
mature-tRNA-Asn-GTT_CCA_end	20.6578	0.0620488	0.251945	0.246279	0.805466	0.953977
mature-mt_tRNA-Val-TAC_3_end	460.84	-0.106145	0.467853	-0.226876	0.82052	0.953977
mature-tRNA-Lys-CTT_CCA_end	32.5673	0.0837132	0.375178	0.223129	0.823435	0.953977
mature-tRNA-Ala-TGC_CCA_end	34.6006	0.0595933	0.267852	0.222485	0.823936	0.953977
mature-tRNA-Arg-TCT_5_end	17.7488	0.178188	0.805125	0.221317	0.824845	0.953977
mature-tRNA-Val-TAC_3_end	91.4606	0.049068	0.228804	0.214454	0.830193	0.953977
mature-tRNA-Gly-GCC_5_end	98198.9	0.0537233	0.251449	0.213655	0.830816	0.953977
mature-tRNA-Cys-GCA_5_end	2309.49	-0.0378489	0.20478	-0.184827	0.853364	0.953977
mature-tRNA-Val-CAC_CCA_end	84.501	-0.0583344	0.31985	-0.18238	0.855284	0.953977
mature-tRNA-Arg-CCT_CCA_end	19.9211	0.0496961	0.28404	0.174962	0.86111	0.953977
mature-tRNA-Ser-GCT_3_end	25.2522	0.0398712	0.234683	0.169894	0.865093	0.953977
mature-tRNA-Gly-CCC_5_end	20454.4	-0.0458484	0.275227	-0.166584	0.867697	0.953977
mature-tRNA-Ala-CGC_CCA_end	21.4866	0.0444949	0.287877	0.154562	0.877166	0.953977
mature-tRNA-Gly-TCC_3_end	8.96613	-0.0455336	0.29869	-0.152444	0.878837	0.953977
mature-tRNA-SeC-TCA_5_end	852.179	-0.0201733	0.144034	-0.140059	0.888613	0.953977
mature-tRNA-Gln-CTG_CCA_end	988.909	0.0329844	0.238569	0.138259	0.890036	0.953977
mature-tRNA-Ala-AGC_5_end	4413	-0.0193262	0.144161	-0.13406	0.893355	0.953977
mature-tRNA-Tyr-GTA_CCA_end	172.496	0.0389518	0.303454	0.128361	0.897863	0.953977
mature-tRNA-Val-TAC_5_end	882.072	0.0325656	0.256165	0.127127	0.89884	0.953977
mature-tRNA-Ser-CGA_5_end	83.4892	0.0335059	0.278217	0.120431	0.904142	0.953977
mature-tRNA-Gly-CCC_3_end	27.8935	-0.0245636	0.239474	-0.102573	0.918302	0.959771
mature-tRNA-Gln-CTG_3_end	594.637	0.0297803	0.312002	0.0954489	0.923958	0.959771
mature-tRNA-Arg-CCG_CCA_end	25.5389	-0.0178157	0.265804	-0.0670258	0.946561	0.970988
mature-tRNA-Val-AAC_5_end	5478.45	0.0127027	0.199573	0.0636497	0.949249	0.970988
mature-tRNA-Ser-TGA_CCA_end	20.5093	-0.00929367	0.250341	-0.037124	0.970386	0.985089
mature-mt_tRNA-Ser-GCT_5_end	861.282	-0.00305413	0.181803	-0.0167991	0.986597	0.988713
mature-tRNA-Lys-TTT_CCA_end	46.5242	-0.00365568	0.25841	-0.0141468	0.988713	0.988713

## Sheet: Table S7 sRNA Donkin, ITAS
	baseMean	log2FoldChange	lfcSE	stat	pvalue	padj
hsa-piR-33029	2404.92	-0.849163	0.19824	-4.2835	1.8397e-05	0.200439
hsa-miR-155-5p	21.9658	1.52831	0.504277	3.03069	0.00243993	0.998858
5S_dup10_seq_371	7.9831	0.890184	0.301571	2.95182	0.00315903	0.998858
hsa-miR-497-5p	5.9313	1.11409	0.406938	2.73774	0.00618633	0.998858
hsa-piR-8652	1.27957	-2.64372	0.969193	-2.72776	0.00637668	0.998858
hsa-miR-195-3p	1.25107	1.90865	0.709282	2.69096	0.00712467	0.998858
hsa-piR-33047	960.418	-0.618432	0.233784	-2.64532	0.00816137	0.998858
hsa-miR-6516-5p	1.67954	1.92028	0.729667	2.63172	0.00849545	0.998858
hsa-miR-3663-5p	5.1847	-1.08539	0.432972	-2.50683	0.012182	0.998858
hsa-miR-518c-3p	0.999692	-2.11566	0.845964	-2.50089	0.0123883	0.998858
hsa-piR-16196	1.36791	1.51236	0.61946	2.44141	0.0146299	0.998858
hsa-piR-16374	1.07854	-2.14033	0.886495	-2.41438	0.0157622	0.998858
tRNA-Asn-ATT-1-2	2.68267	1.11412	0.472504	2.35791	0.0183781	0.998858
5S_dup33_seq_246	17.5025	0.772873	0.329072	2.34864	0.0188419	0.998858
hsa-piR-13522	2.05265	-1.43869	0.617953	-2.32816	0.0199038	0.998858
hsa-piR-29994	2.96929	-1.21641	0.53225	-2.28541	0.022289	0.998858
5S_dup10_seq_594	6.09678	-0.733618	0.325582	-2.25325	0.0242435	0.998858
hsa-piR-27690	1.7119	-1.40987	0.629069	-2.2412	0.025013	0.998858
hsa-piR-29283	0.720813	-1.99917	0.894294	-2.23548	0.0253861	0.998858
hsa-piR-28059	12.7904	0.842524	0.377172	2.23379	0.0254967	0.998858
hsa-piR-9187	2.46355	-1.4777	0.663781	-2.22619	0.0260012	0.998858
hsa-piR-4905	0.897803	-1.9935	0.899676	-2.21579	0.0267056	0.998858
5S_dup7_seq_711	16.5621	-0.679624	0.309366	-2.19683	0.0280326	0.998858
LSU-rRNA_Hsa_dup4_seq_1367	100.888	-0.681102	0.310083	-2.19652	0.0280549	0.998858
hsa-piR-6085	0.725995	-1.97473	0.900707	-2.19243	0.0283487	0.998858
hsa-piR-5791	1.06777	1.46395	0.672578	2.17662	0.0295091	0.998858
LSU-rRNA_Hsa_dup13_seq_1054	245.618	0.376789	0.17446	2.15974	0.0307925	0.998858
hsa-miR-6885-3p	0.96088	-1.85072	0.867307	-2.13387	0.0328532	0.998858
hsa-piR-13832	0.951545	-1.93625	0.91103	-2.12534	0.0335583	0.998858
5S_dup48_seq_765	1.21575	-1.67588	0.788614	-2.1251	0.0335782	0.998858
5S_dup36_seq_526	6.46863	-0.824371	0.388911	-2.11969	0.0340323	0.998858
LSU-rRNA_Hsa_dup2_seq_162	1.70218	1.33657	0.631802	2.11549	0.034388	0.998858
hsa-piR-32998	9.37452	-1.46148	0.693054	-2.10876	0.0349656	0.998858
hsa-piR-12219	0.993535	-1.57903	0.753301	-2.09615	0.036069	0.998858
LSU-rRNA_Hsa_dup8_seq_1118	769.616	-0.54009	0.258729	-2.08748	0.0368452	0.998858
hsa-piR-2380	2.1664	1.19279	0.576944	2.06743	0.0386941	0.998858
tRNA-Met-CAT-4-3	10.3221	-0.795373	0.385382	-2.06386	0.0390313	0.998858
hsa-miR-12136	2551.53	-0.5754	0.279052	-2.06198	0.0392097	0.998858
5S_dup67_seq_1157	4.50953	-0.754702	0.368194	-2.04974	0.0403897	0.998858
5S_dup9_seq_148	27.6229	-0.483308	0.235799	-2.04966	0.0403973	0.998858
tRNA-Met-CAT-4-2	10.7609	-0.753643	0.367773	-2.0492	0.0404421	0.998858
5S_dup3_seq_1487	1.56441	-1.44475	0.706063	-2.0462	0.0407362	0.998858
hsa-piR-8638	0.405497	-2.2489	1.1015	-2.04166	0.0411849	0.998858
hsa-piR-26749	0.966526	-1.8248	0.896604	-2.03524	0.0418269	0.998858
hsa-piR-2765	3.56867	-1.52096	0.750426	-2.02679	0.0426838	0.998858
5S_dup45_seq_196	360.378	0.857743	0.423548	2.02514	0.0428532	0.998858
hsa-piR-6998	0.859003	1.75411	0.868352	2.02004	0.043379	0.998858
hsa-piR-11084	1.56414	-1.33956	0.664942	-2.01456	0.0439508	0.998858
5S_dup75_seq_99	365.76	0.856152	0.425799	2.01069	0.0443577	0.998858
LSU-rRNA_Hsa_dup14_seq_194	13.39	-0.667626	0.332041	-2.01067	0.0443602	0.998858
hsa-piR-6742	1.3979	-1.38532	0.690842	-2.00526	0.0449354	0.998858
hsa-piR-32984	14533.1	-0.499108	0.248965	-2.00473	0.0449917	0.998858
hsa-piR-23839	3.00266	-1.19436	0.596701	-2.00161	0.0453267	0.998858
5S_dup2_seq_1565	25.1895	-0.429425	0.214608	-2.00097	0.0453951	0.998858
tRNA-Lys-CTT-1-2	1611.44	-0.563884	0.281987	-1.99968	0.0455351	0.998858
5S_dup21_seq_1368	16.8839	0.577645	0.289041	1.99849	0.045664	0.998858
5S_dup36_seq_751	999.229	0.833909	0.417645	1.99669	0.0458586	0.998858
hsa-piR-2043	0.835711	1.65481	0.82914	1.99581	0.0459546	0.998858
tRNA-Lys-CTT-6-1	1747.51	-0.846394	0.424351	-1.99456	0.0460907	0.998858
tRNA-Glu-TTC-10-2	13.01	-0.549217	0.27658	-1.98574	0.0470618	0.998858
hsa-piR-6777	4.40314	0.937524	0.476071	1.9693	0.048919	0.998858
tRNA-Phe-GAA-4-1	2.93669	0.842257	0.427969	1.96803	0.0490643	0.998858
hsa-piR-23635	0.688244	1.75003	0.890512	1.96519	0.049392	0.998858
tRNA-Leu-TAG-3-1	747.107	-0.645162	0.328515	-1.96387	0.0495447	0.998858
hsa-miR-199b-3p	6.35244	-0.835172	0.425605	-1.96232	0.0497257	0.998858
5S_dup29_seq_1468	13.4127	-0.575239	0.293426	-1.96042	0.0499468	0.998858
hsa-piR-16675	0.901944	-1.63207	0.834997	-1.95458	0.0506327	0.998858
LSU-rRNA_Hsa_dup6_seq_589	1248.59	-0.515415	0.263936	-1.9528	0.050843	0.998858
hsa-piR-23774	0.860342	-1.69715	0.869862	-1.95106	0.0510499	0.998858
hsa-piR-32962	1383.58	-0.605132	0.310224	-1.95063	0.051101	0.998858
hsa-miR-455-5p	13.5065	0.57676	0.296652	1.94423	0.0518672	0.998858
LSU-rRNA_Hsa_dup8_seq_1442	1297.38	-0.504005	0.259257	-1.94403	0.0518914	0.998858
hsa-miR-4485-3p	42.9216	-0.670312	0.345141	-1.94214	0.0521207	0.998858
hsa-miR-4763-3p	0.443306	1.85579	0.963018	1.92706	0.0539723	0.998858
5S_dup7_seq_1091	3.91597	-0.942832	0.489684	-1.92539	0.0541808	0.998858
hsa-piR-25843	11.264	-0.837145	0.43516	-1.92376	0.0543843	0.998858
hsa-piR-4105	1.20684	-1.566	0.814669	-1.92225	0.0545745	0.998858
hsa-miR-7151-3p	0.749566	1.73978	0.906119	1.92003	0.0548536	0.998858
hsa-miR-323a-3p	1.94774	-1.09043	0.568221	-1.91903	0.0549808	0.998858
hsa-piR-11770	3.20479	-0.958289	0.499491	-1.91853	0.0550438	0.998858
5S_dup31_seq_397	107.877	0.820843	0.428062	1.91758	0.0551641	0.998858
hsa-piR-1612	1230.7	-0.431202	0.22494	-1.91696	0.0552429	0.998858
5S_dup28_seq_393	5.80285	-0.698348	0.365455	-1.9109	0.0560173	0.998858
hsa-piR-30926	1.02784	-1.68204	0.881263	-1.90867	0.0563049	0.998858
5S_dup56_seq_77	37.4714	0.85366	0.447358	1.90823	0.0563621	0.998858
hsa-piR-7908	0.65094	-2.14733	1.12981	-1.90061	0.0573533	0.998858
hsa-miR-4488	2.86087	-0.867486	0.456596	-1.8999	0.0574462	0.998858
hsa-piR-32144	0.643514	-2.01764	1.0673	-1.89041	0.0587032	0.998858
hsa-piR-28218	1.00359	-1.63741	0.869985	-1.88211	0.0598207	0.998858
hsa-piR-18549	3.08821	0.850161	0.451752	1.88192	0.0598468	0.998858
hsa-piR-27639	1.68188	-1.20367	0.640112	-1.88041	0.0600523	0.998858
hsa-miR-3200-3p	0.578552	1.7496	0.933395	1.87445	0.0608689	0.998858
tRNA-Leu-TAA-1-1	203.2	-0.578325	0.309086	-1.87108	0.061334	0.998858
5S_dup46_seq_339	990.807	0.77966	0.417059	1.86942	0.0615638	0.998858
hsa-miR-891a-5p	1762.94	0.585363	0.31322	1.86885	0.061643	0.998858
hsa-piR-12563	0.843322	-1.55867	0.835908	-1.86465	0.062231	0.998858
hsa-miR-369-3p	2.17585	-1.07508	0.576669	-1.8643	0.0622797	0.998858
hsa-piR-13023	1.53015	-1.13155	0.609332	-1.85703	0.0633068	0.998858
tRNA-Glu-TTC-8-1	33.2543	-0.422272	0.227504	-1.8561	0.0634386	0.998858
hsa-piR-6119	2.83171	-1.02712	0.554436	-1.85254	0.0639476	0.998858
hsa-piR-32150	0.634656	1.72956	0.933954	1.85187	0.0640451	0.998858
5S_dup11_seq_18	25.6368	0.622286	0.336463	1.84949	0.0643865	0.998858
hsa-piR-12545	1.00659	-1.77534	0.961419	-1.84658	0.0648076	0.998858
hsa-piR-11133	0.881203	-1.66199	0.901395	-1.8438	0.065212	0.998858
hsa-piR-7480	1.88778	-1.26784	0.688229	-1.84217	0.06545	0.998858
hsa-piR-3680	0.933005	-1.65929	0.904453	-1.83458	0.0665686	0.998858
5S_dup1_seq_631	333.462	0.76448	0.417251	1.83218	0.0669243	0.998858
hsa-miR-221-5p	5.07002	0.860629	0.470154	1.83053	0.0671712	0.998858
hsa-piR-18948	2.63481	-1.10633	0.606597	-1.82384	0.0681767	0.998858
hsa-piR-29106	1.46472	1.35121	0.746027	1.81121	0.0701081	0.998858
5S_seq_1423	0.808492	-1.78849	0.98774	-1.81069	0.0701885	0.998858
tRNA-Phe-GAA-5-1	3.15105	-1.19471	0.660712	-1.80822	0.0705722	0.998858
hsa-miR-10401-5p	0.590665	-1.98162	1.0998	-1.8018	0.0715768	0.998858
hsa-miR-411-3p	0.601306	-1.93513	1.07438	-1.80116	0.0716772	0.998858
tRNA-Lys-CTT-12-1	8.58856	-0.831748	0.462216	-1.79948	0.0719433	0.998858
hsa-piR-11551	3.25989	-1.0193	0.567557	-1.79593	0.0725049	0.998858
tRNA-Glu-TTC-10-1	33.1838	-0.476698	0.265622	-1.79465	0.0727099	0.998858
hsa-piR-14516	0.647268	-1.667	0.930633	-1.79125	0.0732533	0.998858
hsa-piR-5136	0.631812	-1.6655	0.931067	-1.78881	0.0736451	0.998858
5S_dup11_seq_290	417.474	0.652464	0.365439	1.78542	0.0741927	0.998858
hsa-miR-106b-3p	75.5427	0.310777	0.174636	1.77957	0.0751462	0.998858
hsa-piR-30122	0.46641	-1.98599	1.1183	-1.77589	0.0757502	0.998858
5S_dup12_seq_875	0.827488	1.42029	0.80061	1.77401	0.0760614	0.998858
5S_dup19_seq_30	25.6371	0.491394	0.277786	1.76897	0.0768996	0.998858
5S_seq_630	12.3064	-0.474217	0.268205	-1.76811	0.077042	0.998858
tRNA-Und-NNN-1-1	2.93026	-1.03554	0.586268	-1.76633	0.0773401	0.998858
hsa-piR-21273	0.859754	-1.77997	1.00925	-1.76365	0.0777908	0.998858
hsa-piR-15876	1.03503	-1.26043	0.714813	-1.7633	0.0778491	0.998858
hsa-piR-8642	1.12412	-1.37378	0.779218	-1.76302	0.0778965	0.998858
hsa-piR-8176	0.662318	-1.62974	0.925832	-1.76029	0.0783581	0.998858
tRNA-Val-TAC-4-1	6.05652	-0.701611	0.400365	-1.75243	0.0797005	0.998858
hsa-piR-6073	1.55806	1.09264	0.624338	1.75007	0.0801058	0.998858
hsa-piR-12653	1.09291	-1.36628	0.781363	-1.74858	0.0803636	0.998858
5S_dup85_seq_108	0.745493	1.50014	0.858072	1.74826	0.0804184	0.998858
5S_dup45_seq_1329	489.592	0.597901	0.342504	1.74568	0.080867	0.998858
hsa-miR-766-3p	1.0067	1.27687	0.731675	1.74513	0.0809617	0.998858
tRNA-iMet-CAT-3-1	0.570973	-2.33031	1.33594	-1.74433	0.0811017	0.998858
hsa-miR-409-5p	1.73217	-1.0756	0.61967	-1.73577	0.0826052	0.998858
hsa-piR-8047	3.58773	-0.809245	0.466389	-1.73513	0.0827184	0.998858
hsa-piR-24977	1.15012	1.26807	0.730901	1.73495	0.0827504	0.998858
hsa-piR-32723	16.3115	-1.26885	0.731959	-1.73349	0.083008	0.998858
tRNA-Lys-CTT-1-1	5641.1	-0.461685	0.267103	-1.72849	0.0839002	0.998858
hsa-piR-16057	0.502438	-1.87115	1.08279	-1.72809	0.0839721	0.998858
hsa-piR-25364	0.911809	1.34771	0.78012	1.72757	0.0840651	0.998858
hsa-piR-26417	2.59792	1.39044	0.806144	1.72481	0.0845623	0.998858
hsa-piR-32976	681.848	-0.488678	0.284146	-1.71982	0.0854658	0.998858
LSU-rRNA_Hsa_dup9_seq_1127	1.1974	1.14839	0.668861	1.71693	0.0859925	0.998858
5S_dup14_seq_224	422.951	0.658371	0.38366	1.71603	0.0861569	0.998858
hsa-piR-19870	1.7782	1.25371	0.731793	1.71321	0.0866743	0.998858
hsa-miR-26a-2-3p	0.978227	-1.46006	0.852302	-1.71308	0.0866984	0.998858
hsa-piR-2590	0.415639	-1.85443	1.08266	-1.71284	0.0867418	0.998858
hsa-piR-7238	0.631623	-1.63987	0.957714	-1.71227	0.0868461	0.998858
hsa-piR-7822	2.72507	-0.863163	0.505445	-1.70773	0.0876865	0.998858
hsa-piR-1927	1.04225	-1.4191	0.830993	-1.70771	0.0876902	0.998858
5S_dup78_seq_571	41.4525	-0.450244	0.263781	-1.70689	0.0878434	0.998858
LSU-rRNA_Hsa_dup18_seq_1339	0.487345	1.702	0.998168	1.70513	0.0881704	0.998858
tRNA-Arg-TCG-2-1	19.0551	-0.92739	0.544916	-1.7019	0.0887749	0.998858
hsa-piR-27570	3286.47	-0.536574	0.316531	-1.69517	0.0900433	0.998858
hsa-piR-28763	1350.8	-0.715349	0.422881	-1.69161	0.0907202	0.998858
LSU-rRNA_Hsa_dup20_seq_701	106.833	0.285374	0.168724	1.69136	0.090768	0.998858
hsa-piR-9768	1.13867	-1.6158	0.957565	-1.6874	0.0915256	0.998858
hsa-piR-30422	0.800309	-1.3904	0.824083	-1.68721	0.0915625	0.998858
hsa-piR-5173	1.1303	-1.30494	0.773582	-1.68688	0.0916256	0.998858
hsa-piR-15406	3.76077	-1.32268	0.784754	-1.68547	0.0918987	0.998858
tRX-Asn-NNN-1-1	5.88775	0.730405	0.433491	1.68494	0.0920008	0.998858
hsa-piR-32974	20922.9	0.304357	0.180668	1.68462	0.0920612	0.998858
hsa-piR-32985	3928.23	-0.531879	0.316023	-1.68304	0.0923671	0.998858
5S_dup72_seq_1164	24.0276	0.562856	0.334728	1.68153	0.0926598	0.998858
hsa-piR-29611	0.891803	-1.71365	1.01914	-1.68147	0.0926713	0.998858
hsa-piR-17621	2.79948	0.998757	0.595681	1.67666	0.0936084	0.998858
5S_dup17_seq_431	16.7867	0.612114	0.365226	1.67599	0.093741	0.998858
hsa-miR-3617-5p	3.01465	0.80969	0.483406	1.67497	0.0939407	0.998858
LSU-rRNA_Hsa_dup7_seq_591	143.746	-0.434655	0.25957	-1.67452	0.0940287	0.998858
hsa-miR-501-5p	1.04439	1.29796	0.776516	1.67151	0.0946201	0.998858
hsa-piR-23278	1.18396	1.7365	1.03907	1.67121	0.0946803	0.998858
5S_dup7_seq_890	4.34787	0.729816	0.437183	1.66936	0.0950464	0.998858
tRNA-Cys-GCA-22-1	18.5987	-0.562346	0.337313	-1.66713	0.0954878	0.998858
hsa-miR-890	10.2116	0.837638	0.502543	1.6668	0.0955543	0.998858
5S_dup58_seq_780	106.65	0.596453	0.358366	1.66437	0.0960392	0.998858
hsa-piR-4341	0.917235	-1.37527	0.826412	-1.66414	0.096084	0.998858
tRNA-Ala-AGC-6-1	9.74966	0.483676	0.290829	1.66309	0.0962938	0.998858
tRNA-Val-CAC-7-1	149.128	0.398095	0.239419	1.66275	0.096362	0.998858
hsa-miR-493-5p	0.745314	-1.84981	1.11327	-1.6616	0.0965924	0.998858
hsa-piR-4303	1.61156	-1.18209	0.714516	-1.6544	0.0980469	0.998858
hsa-piR-4758	0.644523	-1.52768	0.925203	-1.65118	0.098702	0.998858
LSU-rRNA_Hsa_dup11_seq_262	685.298	-0.431481	0.261635	-1.64917	0.0991129	0.998858
hsa-piR-2484	1.73399	-1.09613	0.6647	-1.64906	0.0991354	0.998858
hsa-miR-151b	1.1868	-1.15177	0.698529	-1.64885	0.0991792	0.998858
hsa-piR-24666	1.47219	1.20462	0.731007	1.64789	0.0993761	0.998858
tRNA-Leu-TAG-1-1	825.153	-0.300014	0.182184	-1.64677	0.0996057	0.998858
tRNA-Ala-AGC-24-1	2.76094	-0.97692	0.593624	-1.64569	0.0998278	0.998858
5S_dup12_seq_1355	1.96851	-0.895386	0.544403	-1.64471	0.100029	0.998858
5S_dup38_seq_256	20.5262	0.354134	0.215524	1.64314	0.100355	0.998858
hsa-piR-10446	1.81328	1.08936	0.664045	1.6405	0.100902	0.998858
hsa-piR-33053	0.879527	-1.51855	0.929074	-1.63448	0.102158	0.998858
hsa-piR-10594	2.27653	0.857226	0.524912	1.63309	0.102451	0.998858
hsa-piR-27624	0.485669	-1.56494	0.958349	-1.63295	0.102479	0.998858
hsa-miR-3180-5p	0.419104	-1.91699	1.17443	-1.63228	0.102622	0.998858
hsa-piR-31000	0.651785	-1.43932	0.882245	-1.63143	0.1028	0.998858
hsa-piR-10681	1.037	-1.2621	0.774077	-1.63045	0.103006	0.998858
hsa-piR-25498	3.90603	0.748985	0.459467	1.63011	0.103077	0.998858
hsa-piR-17863	0.517132	-2.02959	1.24564	-1.62935	0.103239	0.998858
5S_dup67_seq_1265	105.229	0.702177	0.431103	1.62879	0.103357	0.998858
5S_dup25_seq_735	0.554527	-1.66407	1.0229	-1.62682	0.103776	0.998858
hsa-piR-9199	2.37573	-0.97186	0.597577	-1.62633	0.103879	0.998858
tRNA-Phe-GAA-3-1	3.32238	0.882479	0.54292	1.62543	0.104071	0.998858
tRNA-Leu-AAG-1-1	789.38	-0.305926	0.188646	-1.6217	0.104868	0.998858
tRNA-Leu-AAG-2-1	313.606	-0.373475	0.230476	-1.62045	0.105136	0.998858
hsa-piR-4163	2.78203	-0.770994	0.476197	-1.61906	0.105433	0.998858
tRNA-Leu-AAG-1-3	782.709	-0.305513	0.188751	-1.6186	0.105533	0.998858
hsa-piR-31836	0.330157	2.0921	1.29315	1.61783	0.105699	0.998858
hsa-piR-4757	1.47999	-1.3375	0.828037	-1.61527	0.106253	0.998858
5S_dup87_seq_813	129.897	0.71757	0.444518	1.61427	0.10647	0.998858
hsa-piR-11472	1.42927	1.30237	0.806902	1.61404	0.106518	0.998858
hsa-piR-19104	1.61201	0.896467	0.55603	1.61226	0.106905	0.998858
hsa-piR-30544	1.01009	-1.37413	0.852576	-1.61174	0.107019	0.998858
hsa-piR-20436	1.55555	-1.1889	0.737848	-1.61131	0.107112	0.998858
5S_dup18_seq_228	0.971434	1.12538	0.699373	1.60913	0.107588	0.998858
hsa-piR-32932	2.88695	0.809289	0.504618	1.60376	0.108766	0.998858
hsa-piR-194	1.46337	-1.00869	0.629493	-1.60238	0.109072	0.998858
hsa-piR-29163	1.14079	-1.19683	0.747047	-1.60209	0.109136	0.998858
hsa-miR-451a	1.56266	0.949522	0.592804	1.60175	0.109212	0.998858
hsa-piR-17145	1.26476	-1.08672	0.67918	-1.60005	0.109588	0.998858
5S_dup5_seq_582	6.85956	-0.561623	0.351413	-1.59819	0.110002	0.998858
hsa-miR-223-3p	1.59506	1.26059	0.790438	1.5948	0.110757	0.998858
5S_dup16_seq_1198	4.18702	-0.699418	0.439726	-1.59058	0.111705	0.998858
tRNA-Cys-GCA-15-1	47.9377	-0.477194	0.300099	-1.59012	0.111807	0.998858
5S_dup70_seq_1161	687.593	0.426636	0.268328	1.58998	0.111839	0.998858
hsa-piR-15208	0.607844	-1.59704	1.00492	-1.58923	0.112009	0.998858
hsa-miR-151a-5p	3.64982	0.69949	0.440733	1.58711	0.112488	0.998858
hsa-piR-31365	0.423521	-1.82339	1.15124	-1.58385	0.113228	0.998858
5S_dup93_seq_821	4.67099	-0.589725	0.373017	-1.58096	0.113887	0.998858
hsa-piR-5082	0.487111	-1.71976	1.08972	-1.57816	0.114528	0.998858
tRNA-Ala-AGC-11-1	147.586	0.388607	0.246497	1.57652	0.114906	0.998858
hsa-piR-10775	0.688984	-1.54134	0.977835	-1.57628	0.114962	0.998858
5S_dup37_seq_626	0.908302	-1.28177	0.813478	-1.57567	0.115102	0.998858
5S_dup45_seq_1538	1.09475	1.10979	0.707389	1.56885	0.116682	0.998858
hsa-miR-29c-5p	10.1798	0.542906	0.346205	1.56816	0.116843	0.998858
hsa-piR-19260	0.465951	1.48469	0.950084	1.56269	0.118125	0.998858
hsa-piR-24868	0.48695	-1.57262	1.00797	-1.56019	0.118715	0.998858
hsa-miR-1283	12.379	-0.653906	0.419159	-1.56004	0.11875	0.998858
hsa-piR-12437	1.79502	-1.19035	0.763196	-1.55969	0.118833	0.998858
hsa-piR-499	1.04375	-1.1645	0.746816	-1.55928	0.118929	0.998858
LSU-rRNA_Hsa_dup30_seq_118	40.1846	0.310113	0.199043	1.55802	0.119227	0.998858
LSU-rRNA_Hsa_dup12_seq_1477	89.7843	0.226174	0.145204	1.55763	0.11932	0.998858
hsa-piR-28857	0.656453	-1.49712	0.961196	-1.55756	0.119337	0.998858
hsa-piR-12585	1.59827	-1.06495	0.683746	-1.55752	0.119346	0.998858
hsa-piR-19272	3.19016	-0.828652	0.532552	-1.556	0.119708	0.998858
LSU-rRNA_Hsa_dup14_seq_766	180.24	-0.406806	0.26154	-1.55543	0.119844	0.998858
5S_dup30_seq_44	42.8718	0.304631	0.196007	1.55418	0.120141	0.998858
hsa-piR-32950	0.772213	-1.35965	0.875456	-1.55308	0.120404	0.998858
hsa-miR-526b-5p	2.55174	0.831705	0.536529	1.55016	0.121103	0.998858
hsa-piR-18754	1.5362	-1.0121	0.653256	-1.54932	0.121306	0.998858
hsa-piR-10628	0.543306	-1.45491	0.939322	-1.5489	0.121406	0.998858
hsa-piR-25974	23.5645	-0.564932	0.365221	-1.54682	0.121906	0.998858
hsa-piR-4707	9.4692	0.536472	0.347268	1.54484	0.122386	0.998858
hsa-piR-26508	0.443976	1.73305	1.12371	1.54226	0.12301	0.998858
tRNA-Gly-CCC-4-1	476.682	-0.479005	0.31134	-1.53853	0.12392	0.998858
hsa-piR-32989	213.497	-0.500029	0.325329	-1.537	0.124294	0.998858
hsa-piR-32953	5.79586	-0.632151	0.411501	-1.53621	0.124488	0.998858
hsa-piR-8654	3.10299	-1.58919	1.03503	-1.5354	0.124685	0.998858
hsa-piR-10015	1.01495	1.46426	0.953862	1.53509	0.124763	0.998858
5S_dup62_seq_1415	0.808593	-1.55589	1.01412	-1.53422	0.124975	0.998858
hsa-piR-9013	2.63386	0.788049	0.514884	1.53054	0.125884	0.998858
LSU-rRNA_Hsa_dup16_seq_200	95.388	0.334191	0.218389	1.53026	0.125953	0.998858
hsa-piR-10736	2.39514	-0.76434	0.49983	-1.5292	0.126215	0.998858
hsa-piR-16532	0.466768	1.41363	0.924461	1.52915	0.126228	0.998858
hsa-miR-129-1-3p	0.415983	-1.66118	1.08683	-1.52847	0.126397	0.998858
hsa-piR-2359	2.5884	-0.854557	0.560562	-1.52447	0.127393	0.998858
hsa-piR-1443	0.399365	-1.72422	1.13108	-1.5244	0.127409	0.998858
5S_dup44_seq_263	17.0509	0.716957	0.470395	1.52416	0.127469	0.998858
tRNA-Arg-TCG-4-1	18.2392	-0.821236	0.539472	-1.5223	0.127935	0.998858
hsa-piR-20152	1.89189	-0.889186	0.584659	-1.52086	0.128294	0.998858
tRNA-Ala-AGC-12-2	1.21849	-1.1358	0.747274	-1.51993	0.128529	0.998858
hsa-miR-454-5p	0.501184	-1.5545	1.02344	-1.51889	0.12879	0.998858
5S_seq_880	36.1853	0.681321	0.450402	1.5127	0.130357	0.998858
hsa-piR-21976	0.72126	1.27103	0.841066	1.51122	0.130733	0.998858
LSU-rRNA_Hsa_dup11_seq_1048	492.936	0.218153	0.144457	1.51016	0.131003	0.998858
tRNA-Lys-CTT-14-1	3.38313	-0.902621	0.598084	-1.50919	0.131251	0.998858
hsa-piR-6287	1.09073	-1.0554	0.700239	-1.50719	0.131761	0.998858
hsa-piR-4462	1.35573	0.883208	0.58605	1.50705	0.131797	0.998858
tRNA-Met-CAT-2-1	12.9091	-0.647593	0.43099	-1.50257	0.13295	0.998858
5S_dup4_seq_489	13.3085	-0.441042	0.293703	-1.50166	0.133185	0.998858
hsa-piR-23004	1.36066	-1.10691	0.737963	-1.49996	0.133626	0.998858
tRNA-Ser-AGA-5-1	1.27521	-1.32732	0.885235	-1.4994	0.133769	0.998858
hsa-piR-1138	0.55828	-1.42831	0.952924	-1.49888	0.133906	0.998858
hsa-miR-205-5p	115.651	0.448808	0.299431	1.49887	0.133908	0.998858
hsa-piR-6055	4.84332	0.600959	0.40111	1.49824	0.134071	0.998858
hsa-piR-11768	0.669352	-1.40481	0.938584	-1.49673	0.134463	0.998858
hsa-piR-20850	0.490826	-1.68571	1.12708	-1.49565	0.134745	0.998858
hsa-piR-28557	2.96487	-0.724433	0.484632	-1.49481	0.134964	0.998858
hsa-piR-33039	3952.75	-0.440924	0.295636	-1.49144	0.135845	0.998858
hsa-miR-892c-3p	18.6301	0.681247	0.457224	1.48996	0.136234	0.998858
hsa-piR-21096	0.450495	-1.47746	0.992422	-1.48874	0.136556	0.998858
hsa-piR-8252	0.594278	1.52883	1.02801	1.48718	0.136967	0.998858
hsa-piR-30021	1.43416	1.20175	0.808502	1.48639	0.137177	0.998858
5S_dup38_seq_627	2.40974	-0.751148	0.505838	-1.48496	0.137556	0.998858
hsa-piR-13428	3.8253	-0.694293	0.467672	-1.48457	0.137657	0.998858
hsa-piR-10357	3.28279	0.848248	0.5719	1.48321	0.138018	0.998858
hsa-miR-17-5p	93.8529	0.411065	0.27726	1.4826	0.138181	0.998858
hsa-miR-129-5p	1.55776	1.02573	0.692346	1.48153	0.138466	0.998858
5S_dup13_seq_647	71.2665	0.296699	0.200488	1.47988	0.138905	0.998858
hsa-piR-9462	0.544666	-1.47729	0.998256	-1.47987	0.138908	0.998858
tRNA-Arg-CCT-3-1	524.342	-0.898189	0.606962	-1.47981	0.138924	0.998858
hsa-piR-21816	2.55123	-1.05108	0.710376	-1.47961	0.138977	0.998858
hsa-miR-23b-5p	0.990354	1.12256	0.759837	1.47738	0.139575	0.998858
hsa-piR-6343	2.61527	0.785296	0.532061	1.47595	0.139957	0.998858
hsa-piR-18198	0.406589	-1.81499	1.23137	-1.47397	0.14049	0.998858
hsa-piR-15757	0.714134	-1.44563	0.981054	-1.47355	0.140604	0.998858
hsa-miR-767-5p	5.42966	-0.690436	0.468813	-1.47273	0.140823	0.998858
tRNA-Pro-CGG-1-3	278.997	-0.469806	0.319437	-1.47073	0.141364	0.998858
hsa-piR-32002	17.6919	-0.538625	0.366342	-1.47028	0.141486	0.998858
tRNA-Leu-AAG-3-1	299.682	-0.343915	0.234061	-1.46934	0.141741	0.998858
hsa-piR-31023	0.86864	1.28785	0.877484	1.46767	0.142195	0.998858
hsa-piR-18275	1.30627	0.892354	0.608541	1.46638	0.142544	0.998858
5S_dup52_seq_970	3543.88	0.279382	0.190593	1.46586	0.142687	0.998858
tRNA-Gly-TCC-1-1	180.809	-0.414585	0.282938	-1.46529	0.142843	0.998858
hsa-piR-9743	0.707035	-1.24133	0.847263	-1.46511	0.142891	0.998858
hsa-piR-19280	1.31937	-0.985657	0.67285	-1.4649	0.142948	0.998858
hsa-piR-16571	0.566475	-1.37243	0.937274	-1.46428	0.143117	0.998858
hsa-piR-15526	0.713047	-1.62339	1.1088	-1.46409	0.143168	0.998858
hsa-miR-105-5p	4.43463	-0.664347	0.454177	-1.46275	0.143536	0.998858
hsa-piR-27703	2.32169	-0.8552	0.584917	-1.46209	0.143718	0.998858
hsa-piR-12215	0.926098	-1.15692	0.792756	-1.45937	0.144464	0.998858
LSU-rRNA_Hsa_dup2_seq_842	163.576	-0.501257	0.343481	-1.45934	0.14447	0.998858
hsa-miR-218-5p	26.9912	0.51264	0.352097	1.45596	0.145404	0.998858
hsa-piR-9680	4.98337	-0.6106	0.419408	-1.45586	0.145431	0.998858
hsa-miR-132-3p	68.436	0.477339	0.328342	1.45379	0.146006	0.998858
hsa-piR-16289	0.952854	-1.30817	0.901101	-1.45174	0.146573	0.998858
hsa-piR-9163	0.856091	-1.34702	0.928303	-1.45106	0.146764	0.998858
hsa-piR-27390	5.32156	-0.690795	0.476185	-1.45068	0.146868	0.998858
5S_dup77_seq_570	81.3616	0.305039	0.210412	1.44972	0.147135	0.998858
hsa-piR-32993	5370.7	-0.487764	0.337131	-1.44681	0.14795	0.998858
5S_dup18_seq_926	288.089	0.64392	0.445242	1.44622	0.148114	0.998858
tRNA-Leu-AAG-1-2	239.836	-0.28887	0.19986	-1.44536	0.148356	0.998858
hsa-piR-18236	0.747702	-1.33135	0.922498	-1.4432	0.148965	0.998858
hsa-piR-21309	1.17146	-1.02402	0.709585	-1.44313	0.148984	0.998858
hsa-piR-31808	1.02436	-1.03429	0.717422	-1.44168	0.149393	0.998858
hsa-piR-25005	0.890191	-1.10948	0.769992	-1.4409	0.149613	0.998858
5S_dup20_seq_1107	6.08379	-0.476992	0.331696	-1.43804	0.150422	0.998858
hsa-piR-8162	0.757247	-1.20177	0.836572	-1.43655	0.150847	0.998858
LSU-rRNA_Hsa_dup18_seq_1559	14.3642	0.439124	0.305739	1.43627	0.150925	0.998858
LSU-rRNA_Hsa_dup3_seq_882	108.765	0.252487	0.175801	1.43621	0.150943	0.998858
hsa-piR-30844	20.5494	-0.468734	0.326383	-1.43615	0.150961	0.998858
hsa-piR-18892	0.620268	-1.46129	1.01752	-1.43613	0.150965	0.998858
hsa-piR-26449	0.552714	1.4649	1.02105	1.43471	0.15137	0.998858
5S_dup37_seq_950	3.73314	-0.678859	0.473699	-1.4331	0.151829	0.998858
hsa-piR-2238	0.622784	-1.57812	1.10148	-1.43273	0.151936	0.998858
5S_dup36_seq_404	19.967	0.359541	0.251015	1.43235	0.152044	0.998858
tRNA-Leu-AAG-2-4	321.131	-0.347557	0.242686	-1.43212	0.152109	0.998858
hsa-piR-21379	0.669631	1.24817	0.872638	1.43034	0.152619	0.998858
hsa-piR-1262	3.85936	-0.570237	0.398909	-1.42949	0.152863	0.998858
hsa-piR-13413	3.44535	-1.01811	0.712725	-1.42848	0.153155	0.998858
tRNA-Thr-CGT-6-1	245.664	-0.42002	0.294434	-1.42653	0.153715	0.998858
5S_dup41_seq_1130	8.2998	0.522732	0.366603	1.42588	0.153902	0.998858
hsa-piR-32121	3.01702	-0.697207	0.489514	-1.42428	0.154364	0.998858
hsa-miR-134-5p	2.65459	-0.746393	0.524519	-1.42301	0.154734	0.998858
LSU-rRNA_Hsa_dup2_seq_232	1.66057	-0.882751	0.620407	-1.42286	0.154777	0.998858
tRX-Cys-NNN-4-1	0.810428	-1.56695	1.10159	-1.42245	0.154897	0.998858
hsa-piR-16329	0.494929	1.34659	0.947475	1.42124	0.155246	0.998858
tRNA-Cys-GCA-20-1	17.9628	-0.509529	0.358629	-1.42077	0.155383	0.998858
tRNA-Arg-CCT-5-1	486.606	-0.95736	0.674688	-1.41897	0.155909	0.998858
hsa-piR-11109	1.38001	1.01637	0.716601	1.41832	0.156096	0.998858
hsa-miR-892b	18.476	0.694653	0.489905	1.41793	0.15621	0.998858
hsa-piR-28700	2.67348	-0.708194	0.499457	-1.41793	0.156211	0.998858
hsa-piR-21532	9.30871	-0.606368	0.428003	-1.41674	0.15656	0.998858
hsa-piR-6829	0.999715	-1.14105	0.806759	-1.41437	0.157254	0.998858
hsa-piR-32995	96.7192	-0.318921	0.225638	-1.41342	0.157533	0.998858
5S_dup42_seq_958	2.6325	0.659212	0.466783	1.41225	0.157878	0.998858
hsa-miR-663b	0.571148	-1.39619	0.990146	-1.41008	0.158515	0.998858
hsa-piR-29857	6.57046	-0.529892	0.376236	-1.40841	0.159011	0.998858
hsa-piR-1510	2.36039	-0.844638	0.599777	-1.40825	0.159056	0.998858
tRNA-Leu-AAG-2-2	1156.09	-0.36989	0.262748	-1.40777	0.159198	0.998858
5S_dup52_seq_1405	1.22171	0.904304	0.642503	1.40747	0.159288	0.998858
LSU-rRNA_Hsa_dup18_seq_979	61.1034	0.365603	0.260141	1.4054	0.159902	0.998858
hsa-piR-31163	0.589948	1.42079	1.01104	1.40527	0.159941	0.998858
hsa-piR-31916	1.09186	-1.04803	0.74579	-1.40526	0.159944	0.998858
hsa-piR-28864	0.865457	-1.31248	0.934526	-1.40444	0.160189	0.998858
tRNA-Asn-GTT-11-2	0.628213	1.49282	1.06384	1.40324	0.160546	0.998858
hsa-piR-3982	0.405943	-1.47602	1.05207	-1.40297	0.160626	0.998858
hsa-piR-4237	0.264933	1.8242	1.30056	1.40263	0.160728	0.998858
hsa-piR-11281	2.04871	0.739699	0.527455	1.40239	0.160798	0.998858
hsa-piR-28957	1.97746	-0.758317	0.540917	-1.40191	0.160942	0.998858
5S_dup11_seq_1284	5.27357	-0.64739	0.46219	-1.4007	0.161304	0.998858
hsa-piR-20108	2.76517	-0.956563	0.683391	-1.39973	0.161594	0.998858
hsa-miR-190a-5p	0.606325	1.22389	0.875046	1.39866	0.161914	0.998858
hsa-miR-524-5p	2.42434	0.97511	0.69772	1.39757	0.162243	0.998858
tRNA-Ile-AAT-3-1	15.6109	-0.609315	0.43629	-1.39658	0.162539	0.998858
hsa-piR-24414	1.53748	0.877506	0.628384	1.39645	0.162579	0.998858
5S_dup30_seq_1379	6.50352	0.84602	0.60589	1.39633	0.162616	0.998858
hsa-miR-324-3p	3.42388	0.61403	0.440172	1.39498	0.163023	0.998858
5S_dup9_seq_288	1.05875	-1.15533	0.828369	-1.3947	0.163105	0.998858
tRNA-Met-CAT-4-1	40.2016	-0.529559	0.380146	-1.39304	0.163608	0.998858
hsa-piR-4202	0.999294	-1.07117	0.769711	-1.39165	0.164028	0.998858
hsa-piR-32894	498.799	-0.416171	0.299106	-1.39138	0.16411	0.998858
hsa-piR-7987	0.531687	1.50937	1.0866	1.38908	0.164807	0.998858
hsa-piR-14384	1.51685	0.833287	0.601039	1.38641	0.165621	0.998858
tRNA-Leu-AAG-2-3	311.636	-0.326683	0.235809	-1.38537	0.165938	0.998858
LSU-rRNA_Hsa_dup3_seq_1034	1239.77	0.12614	0.0912858	1.38181	0.167029	0.998858
tRNA-Pro-CGG-1-1	70.5836	-0.429972	0.311658	-1.37963	0.167702	0.998858
hsa-piR-15016	0.760564	1.62842	1.18113	1.3787	0.167987	0.998858
hsa-miR-582-5p	2.80573	0.793312	0.576581	1.37589	0.168855	0.998858
hsa-piR-28033	60.0436	-1.00336	0.729506	-1.37539	0.169011	0.998858
hsa-piR-10796	0.490248	-1.57571	1.14588	-1.37511	0.169098	0.998858
hsa-miR-7-5p	320.712	0.421549	0.306739	1.37429	0.169351	0.998858
LSU-rRNA_Hsa_dup12_seq_53	81.109	0.275016	0.200438	1.37207	0.170042	0.998858
5S_dup5_seq_414	78.8813	0.250132	0.182341	1.37178	0.170132	0.998858
5S_dup3_seq_410	57.7901	0.224651	0.164018	1.36967	0.170789	0.998858
hsa-miR-142-3p	0.500122	-1.39076	1.01571	-1.36925	0.170922	0.998858
hsa-piR-24103	0.756649	-1.34906	0.985851	-1.36842	0.17118	0.998858
hsa-piR-31184	1.29698	-0.892914	0.652749	-1.36793	0.171334	0.998858
hsa-piR-8852	0.731376	-1.24215	0.908233	-1.36766	0.171418	0.998858
5S_dup17_seq_847	77.605	0.245858	0.179773	1.3676	0.171437	0.998858
hsa-piR-3301	1.33766	-1.03908	0.759867	-1.36745	0.171485	0.998858
5S_dup44_seq_64	4.02622	-0.494986	0.361983	-1.36743	0.171491	0.998858
hsa-piR-16932	10.9262	-0.381289	0.278907	-1.36708	0.171599	0.998858
hsa-piR-378	2.89728	0.665207	0.48741	1.36478	0.172322	0.998858
hsa-piR-5592	7.14083	-0.769246	0.563973	-1.36398	0.172575	0.998858
hsa-piR-5992	1.27971	0.914718	0.670976	1.36326	0.172799	0.998858
hsa-piR-9909	0.278818	1.5227	1.11907	1.36068	0.173614	0.998858
hsa-piR-18004	1.85287	-0.854038	0.627928	-1.36009	0.173802	0.998858
hsa-piR-7875	0.529031	-1.19457	0.87995	-1.35754	0.174609	0.998858
hsa-piR-339	0.290953	1.59925	1.17812	1.35746	0.174635	0.998858
hsa-piR-27794	0.907929	-1.18771	0.876078	-1.35571	0.175191	0.998858
hsa-piR-20694	0.597519	-1.72334	1.27173	-1.35512	0.17538	0.998858
hsa-piR-21473	1.84965	0.793671	0.586525	1.35317	0.176	0.998858
hsa-piR-14083	0.348369	1.80463	1.33554	1.35123	0.176622	0.998858
LSU-rRNA_Hsa_dup5_seq_588	29.2428	-0.511129	0.378557	-1.3502	0.176951	0.998858
hsa-piR-25936	6.58637	-0.560465	0.415245	-1.34972	0.177106	0.998858
tRNA-Thr-TGT-3-1	19.6342	0.400318	0.296696	1.34925	0.177255	0.998858
hsa-miR-1248	1.12159	-1.08417	0.803612	-1.34912	0.177299	0.998858
5S_dup14_seq_1194	0.800865	-1.16069	0.860731	-1.3485	0.177498	0.998858
hsa-piR-23049	0.786489	1.29395	0.95978	1.34817	0.177604	0.998858
5S_dup21_seq_851	100.109	-0.340918	0.252979	-1.34761	0.177784	0.998858
hsa-miR-1306-5p	1.48243	0.952491	0.707612	1.34606	0.178282	0.998858
hsa-piR-25428	0.388434	1.68988	1.25579	1.34566	0.178411	0.998858
hsa-piR-780	2.02008	-0.702961	0.523093	-1.34385	0.178996	0.998858
5S_dup9_seq_892	69.6253	0.261263	0.19453	1.34305	0.179256	0.998858
tRNA-Met-CAT-3-1	34.7555	-0.656625	0.48892	-1.34301	0.179269	0.998858
hsa-miR-628-5p	0.75388	1.1744	0.874829	1.34243	0.179457	0.998858
hsa-piR-1888	0.573596	-1.29297	0.963616	-1.34179	0.179665	0.998858
hsa-piR-2527	4.93745	-0.558491	0.416237	-1.34176	0.179673	0.998858
LSU-rRNA_Hsa_dup10_seq_1047	28.9356	-0.570877	0.425778	-1.34079	0.17999	0.998858
5S_dup22_seq_438	15.0504	-0.305294	0.22771	-1.34072	0.180012	0.998858
hsa-piR-8089	2.08632	-0.822033	0.613196	-1.34057	0.180059	0.998858
hsa-piR-19291	0.44706	-1.27187	0.948845	-1.34045	0.180101	0.998858
tRNA-Cys-GCA-9-4	37.4593	-0.42535	0.317388	-1.34016	0.180194	0.998858
hsa-miR-1343-3p	0.659282	-1.45726	1.08754	-1.33995	0.18026	0.998858
LSU-rRNA_Hsa_dup1_seq_674	673.919	0.193665	0.144585	1.33946	0.180422	0.998858
hsa-piR-2187	2.14085	-0.719834	0.537536	-1.33914	0.180526	0.998858
hsa-miR-889-3p	1.52143	-1.3614	1.01835	-1.33687	0.181264	0.998858
hsa-piR-1513	11.7115	-0.745793	0.557984	-1.33658	0.181358	0.998858
hsa-piR-8965	1.97096	0.788451	0.589935	1.3365	0.181385	0.998858
hsa-piR-12110	0.822767	1.04929	0.785466	1.33589	0.181586	0.998858
5S_dup41_seq_330	2.50965	0.92907	0.695547	1.33574	0.181634	0.998858
hsa-miR-4423-3p	0.972644	-1.21888	0.913979	-1.3336	0.182336	0.998858
5S_dup62_seq_985	25.374	0.415205	0.311397	1.33336	0.182413	0.998858
hsa-piR-26189	0.513679	1.39261	1.04522	1.33236	0.182741	0.998858
tRX-Cys-NNN-2-1	3.19826	-0.694684	0.521632	-1.33175	0.182942	0.998858
hsa-piR-16353	0.983778	-1.06469	0.801037	-1.32913	0.183804	0.998858
hsa-miR-495-3p	6.29287	0.550235	0.414118	1.32869	0.18395	0.998858
hsa-piR-17444	1.74567	-0.768036	0.578536	-1.32755	0.184326	0.998858
hsa-piR-9520	5.97039	-0.489837	0.369049	-1.3273	0.184411	0.998858
hsa-piR-26711	0.714418	-1.2197	0.919117	-1.32703	0.184499	0.998858
hsa-miR-509-5p	19.0971	0.701904	0.529106	1.32658	0.184646	0.998858
hsa-piR-23637	0.414038	-1.30247	0.981941	-1.32643	0.184698	0.998858
SSU-rRNA_Hsa_dup4_seq_1549	628.066	0.298535	0.225181	1.32576	0.18492	0.998858
hsa-piR-19998	0.826119	-1.32176	0.99703	-1.3257	0.18494	0.998858
hsa-piR-3148	1.56742	-0.778209	0.587248	-1.32518	0.185112	0.998858
5S_dup26_seq_479	105.413	-0.310149	0.234085	-1.32494	0.18519	0.998858
LSU-rRNA_Hsa_dup2_seq_721	5.49703	0.504865	0.381131	1.32465	0.185287	0.998858
hsa-piR-16233	0.419542	-1.36492	1.0305	-1.32452	0.18533	0.998858
hsa-piR-3501	2.14474	-1.13434	0.856573	-1.32428	0.185411	0.998858
hsa-miR-892a	172.342	0.484341	0.366101	1.32297	0.185845	0.998858
hsa-piR-32963	1.74724	0.730802	0.553396	1.32058	0.186642	0.998858
5S_dup37_seq_1527	2.48492	0.680408	0.515341	1.32031	0.186733	0.998858
hsa-piR-31159	18.26	-0.501282	0.380215	-1.31842	0.187364	0.998858
hsa-piR-15724	0.500859	-1.43858	1.09285	-1.31635	0.188056	0.998858
hsa-piR-15536	1.2161	-1.2932	0.982525	-1.3162	0.188106	0.998858
5S_dup30_seq_483	5.17516	-0.510537	0.388098	-1.31548	0.188348	0.998858
hsa-piR-25145	3.41969	0.68513	0.521394	1.31403	0.188835	0.998858
SSU-rRNA_Hsa_dup4_seq_1171	905.166	0.159859	0.121759	1.31292	0.189211	0.998858
hsa-piR-30957	1.20988	1.09972	0.83769	1.31281	0.189248	0.998858
hsa-piR-28878	0.344884	-1.51275	1.1524	-1.31269	0.189287	0.998858
hsa-piR-30759	0.788957	-1.17528	0.895464	-1.31249	0.189356	0.998858
hsa-piR-5051	3.60705	0.542728	0.414358	1.30981	0.190262	0.998858
hsa-piR-27583	5.69748	-0.449042	0.342833	-1.3098	0.190264	0.998858
hsa-piR-4611	0.368732	-1.59374	1.21751	-1.30901	0.19053	0.998858
hsa-piR-4801	0.32995	-1.59328	1.21894	-1.3071	0.19118	0.998858
hsa-piR-30794	0.254109	1.4763	1.12993	1.30654	0.191368	0.998858
5S_dup51_seq_1140	11.2	-0.348684	0.266891	-1.30646	0.191395	0.998858
hsa-piR-13412	5.84845	-0.499769	0.382777	-1.30564	0.191675	0.998858
hsa-miR-425-3p	22.0826	0.335291	0.256827	1.30551	0.191718	0.998858
hsa-piR-11332	0.53277	-1.83961	1.4092	-1.30543	0.191747	0.998858
hsa-miR-10527-5p	4.61522	-0.56412	0.432521	-1.30426	0.192144	0.998858
hsa-piR-10667	1.39464	1.17207	0.899703	1.30273	0.192667	0.998858
hsa-piR-20289	0.459357	-1.26612	0.97246	-1.30198	0.192925	0.998858
hsa-piR-28832	0.803045	-1.14385	0.879557	-1.30048	0.193436	0.998858
hsa-piR-2050	0.420288	1.44063	1.10797	1.30024	0.193518	0.998858
hsa-piR-13243	0.40047	1.27942	0.984447	1.29964	0.193726	0.998858
5S_dup13_seq_463	1.67537	-0.783281	0.602895	-1.2992	0.193875	0.998858
hsa-piR-17207	2.04516	-0.798276	0.614665	-1.29872	0.194041	0.998858
hsa-piR-18317	0.506104	-1.51063	1.16362	-1.29821	0.194214	0.998858
hsa-piR-12082	0.525385	1.33745	1.03043	1.29795	0.194303	0.998858
hsa-piR-5953	0.97568	-1.19567	0.921422	-1.29764	0.194411	0.998858
tRNA-Phe-GAA-1-4	40.5637	0.432833	0.333603	1.29745	0.194476	0.998858
hsa-piR-9722	0.483798	-1.517	1.16924	-1.29742	0.194486	0.998858
5S_dup62_seq_1558	4.22221	-0.48187	0.371522	-1.29702	0.194626	0.998858
hsa-piR-10181	1.78928	-0.802802	0.618976	-1.29698	0.194637	0.998858
hsa-miR-452-3p	0.338527	-1.48829	1.14757	-1.29691	0.194662	0.998858
hsa-miR-196b-5p	13.1361	0.611176	0.472237	1.29421	0.195591	0.998858
LSU-rRNA_Hsa_dup7_seq_663	715.847	0.177487	0.137173	1.29389	0.195703	0.998858
hsa-miR-222-3p	53.2639	0.412225	0.318713	1.2934	0.195871	0.998858
hsa-piR-12190	3.43119	-0.825567	0.639171	-1.29162	0.196488	0.998858
hsa-piR-19845	0.618312	-1.28171	0.993082	-1.29064	0.196828	0.998858
hsa-piR-19783	0.850803	-1.18414	0.917721	-1.29031	0.196944	0.998858
hsa-miR-624-5p	2.81167	-0.653557	0.507297	-1.28831	0.197637	0.998858
hsa-piR-19001	1.56298	-0.758316	0.589048	-1.28736	0.19797	0.998858
hsa-miR-202-3p	5.71579	0.602785	0.468453	1.28676	0.198179	0.998858
hsa-piR-27919	0.402081	1.3095	1.01796	1.2864	0.198304	0.998858
hsa-piR-1297	1.60711	0.833274	0.647771	1.28637	0.198313	0.998858
tRNA-Arg-TCG-1-1	126.435	-0.597666	0.465002	-1.2853	0.198688	0.998858
hsa-miR-154-3p	0.934835	1.10615	0.861359	1.28419	0.199075	0.998858
hsa-miR-27b-5p	2.25309	-0.818249	0.637301	-1.28393	0.199167	0.998858
hsa-piR-28160	1.02033	0.895691	0.697966	1.28329	0.199391	0.998858
LSU-rRNA_Hsa_dup17_seq_326	41.4849	0.238535	0.186291	1.28045	0.200388	0.998858
hsa-miR-744-3p	0.527215	1.52176	1.18909	1.27976	0.200628	0.998858
hsa-piR-25963	1.29206	-0.894957	0.69996	-1.27858	0.201044	0.998858
hsa-piR-10593	0.465294	-1.66295	1.302	-1.27723	0.20152	0.998858
hsa-piR-24354	1.4297	-0.883679	0.692631	-1.27583	0.202016	0.998858
hsa-piR-14905	4.43171	-0.527004	0.413379	-1.27487	0.202356	0.998858
hsa-piR-965	0.418988	1.24852	0.979604	1.27451	0.202482	0.998858
hsa-piR-12327	1.40372	-0.883992	0.693626	-1.27445	0.202504	0.998858
5S_dup30_seq_520	0.664684	-1.17061	0.918534	-1.27443	0.202512	0.998858
hsa-piR-1643	0.652873	-1.11624	0.876065	-1.27415	0.20261	0.998858
tRNA-Ser-TGA-2-1	61.726	0.299358	0.234975	1.274	0.202664	0.998858
hsa-miR-29a-3p	569.539	0.424202	0.333202	1.27311	0.20298	0.998858
tRNA-Leu-CAA-6-1	58.1282	-0.478961	0.376465	-1.27226	0.203281	0.998858
hsa-piR-28712	0.872435	-1.1192	0.880157	-1.2716	0.203516	0.998858
hsa-piR-16892	1.90915	0.643404	0.506056	1.27141	0.203583	0.998858
5S_dup2_seq_363	3.29713	-0.528948	0.416854	-1.2689	0.204475	0.998858
hsa-miR-200a-3p	1727.48	0.400797	0.316095	1.26796	0.204811	0.998858
hsa-piR-164	0.97187	-1.02252	0.806914	-1.2672	0.205083	0.998858
hsa-piR-30340	1.39782	-0.799371	0.630937	-1.26696	0.20517	0.998858
hsa-piR-21732	0.599683	-1.36604	1.07972	-1.26518	0.205808	0.998858
hsa-piR-28797	2.79475	-0.746889	0.591848	-1.26196	0.206963	0.998858
hsa-piR-4453	0.779135	1.15728	0.917051	1.26196	0.206965	0.998858
hsa-piR-25389	0.79444	0.99611	0.789437	1.2618	0.207022	0.998858
hsa-piR-25784	1.17152	-0.905015	0.717841	-1.26075	0.2074	0.998858
hsa-piR-24224	3.21957	0.597305	0.474826	1.25795	0.208411	0.998858
hsa-piR-18626	1.14017	-1.24924	0.993374	-1.25757	0.208548	0.998858
hsa-piR-10949	5.10108	-0.712348	0.566553	-1.25734	0.208632	0.998858
tRNA-Ala-AGC-12-1	0.85338	-1.05462	0.840363	-1.25496	0.209494	0.998858
5S_dup61_seq_1414	14.5168	0.489134	0.390014	1.25414	0.209789	0.998858
hsa-piR-1227	2.37829	-0.685392	0.546591	-1.25394	0.209864	0.998858
hsa-miR-181a-2-3p	3.55708	0.580667	0.463158	1.25371	0.209946	0.998858
hsa-piR-10654	0.715404	1.07812	0.860231	1.25329	0.2101	0.998858
hsa-piR-26675	1.4137	-0.81352	0.64951	-1.25251	0.210383	0.998858
5S_dup48_seq_341	113.07	0.275735	0.220509	1.25045	0.211136	0.998858
hsa-piR-29899	2.14824	0.634311	0.507914	1.24885	0.211718	0.998858
hsa-miR-195-5p	9.153	0.592724	0.474765	1.24846	0.211864	0.998858
5S_dup52_seq_205	1.49757	0.999882	0.801496	1.24752	0.212207	0.998858
hsa-miR-589-5p	8.55274	0.373629	0.299665	1.24682	0.212463	0.998858
hsa-piR-26610	1.46148	-0.746319	0.598876	-1.2462	0.212691	0.998858
hsa-piR-9366	0.850874	-1.14463	0.920003	-1.24415	0.213443	0.998858
tRNA-Arg-TCG-3-1	32.0326	-0.673578	0.541695	-1.24346	0.213698	0.998858
5S_dup76_seq_799	12.0966	-0.412358	0.332187	-1.24134	0.214479	0.998858
hsa-piR-3783	0.370633	-1.70663	1.37505	-1.24113	0.214556	0.998858
hsa-piR-6988	1.8811	-1.02942	0.830346	-1.23975	0.215068	0.998858
hsa-piR-17976	0.812011	0.901549	0.72773	1.23885	0.215401	0.998858
5S_dup26_seq_441	63.148	-0.305866	0.247043	-1.23811	0.215676	0.998858
hsa-piR-4122	0.887691	-1.031	0.833911	-1.23634	0.216333	0.998858
tRNA-Cys-GCA-9-1	110.453	-0.373605	0.302229	-1.23617	0.216397	0.998858
hsa-piR-6527	0.556536	-1.09154	0.883781	-1.23508	0.216802	0.998858
hsa-piR-25859	0.292763	-1.71465	1.38906	-1.2344	0.217056	0.998858
hsa-piR-12968	0.402733	1.32159	1.07102	1.23395	0.217223	0.998858
tRNA-Arg-TCG-5-1	91.1186	-0.603949	0.489583	-1.2336	0.217353	0.998858
hsa-piR-22417	1.30385	-0.811152	0.658226	-1.23233	0.217825	0.998858
hsa-piR-13437	0.498864	1.17637	0.95481	1.23205	0.21793	0.998858
hsa-piR-2314	0.596729	1.13923	0.924797	1.23187	0.217997	0.998858
hsa-piR-24726	0.549994	-1.22786	0.997462	-1.23099	0.218328	0.998858
hsa-miR-769-3p	0.447004	-1.44799	1.17634	-1.23092	0.218352	0.998858
tRNA-Met-CAT-5-2	31.5836	-0.430244	0.349666	-1.23044	0.218532	0.998858
hsa-piR-30256	1.44723	-0.857846	0.697952	-1.22909	0.219038	0.998858
hsa-piR-8281	1.07447	-1.04407	0.849541	-1.22898	0.219079	0.998858
5S_dup12_seq_373	8.93712	-0.351431	0.286337	-1.22733	0.219697	0.998858
hsa-miR-548ba	1.37629	-0.796831	0.64926	-1.22729	0.219713	0.998858
5S_dup74_seq_1000	4402.64	0.212661	0.173353	1.22675	0.219917	0.998858
hsa-piR-23420	1.1598	0.768438	0.626423	1.22671	0.219932	0.998858
hsa-miR-141-3p	108.403	0.431818	0.352162	1.22619	0.220126	0.998858
hsa-piR-11543	1.64094	-0.826787	0.674368	-1.22602	0.220192	0.998858
hsa-piR-15417	0.607111	1.02684	0.837855	1.22556	0.220363	0.998858
hsa-piR-4342	2.9256	0.657929	0.537246	1.22463	0.220713	0.998858
tRX-Lys-NNN-1-1	10.8787	-0.718942	0.587253	-1.22425	0.22086	0.998858
5S_dup12_seq_895	12.3942	0.364565	0.297926	1.22368	0.221074	0.998858
hsa-piR-2705	0.480881	-1.36717	1.11726	-1.22367	0.221075	0.998858
hsa-piR-20979	6.20192	-0.548708	0.448431	-1.22362	0.221097	0.998858
tRNA-Arg-CCT-7-1	12.4452	-0.443249	0.362303	-1.22342	0.221171	0.998858
hsa-piR-22472	1.99301	-0.804388	0.657839	-1.22277	0.221415	0.998858
hsa-piR-94	0.505196	-1.36053	1.11339	-1.22197	0.22172	0.998858
hsa-piR-4479	4.32447	0.620097	0.507494	1.22188	0.221753	0.998858
hsa-miR-106a-3p	2.80588	0.545856	0.447138	1.22078	0.222171	0.998858
hsa-piR-16799	0.550996	1.17524	0.962708	1.22076	0.222177	0.998858
hsa-piR-30693	0.964159	0.957885	0.785535	1.2194	0.222691	0.998858
hsa-let-7e-3p	0.980412	1.07354	0.880873	1.21872	0.222951	0.998858
hsa-piR-3625	0.536924	-1.35164	1.10928	-1.21849	0.223038	0.998858
tRNA-Pro-AGG-2-6	173.261	-0.366853	0.301251	-1.21776	0.223314	0.998858
hsa-miR-552-3p	29.7633	-0.390207	0.320578	-1.2172	0.223528	0.998858
hsa-piR-20792	23.7818	-0.554177	0.455331	-1.21708	0.223572	0.998858
LSU-rRNA_Hsa_dup13_seq_957	166.567	-0.211888	0.174266	-1.21589	0.224028	0.998858
hsa-piR-4811	0.490107	-1.43792	1.18339	-1.21509	0.224333	0.998858
hsa-piR-11439	9.53538	0.444187	0.366006	1.21361	0.224898	0.998858
hsa-miR-192-5p	222.52	0.306273	0.252576	1.2126	0.225284	0.998858
hsa-piR-1106	0.421013	-1.54437	1.27385	-1.21236	0.225374	0.998858
hsa-piR-11269	1.99115	-0.998035	0.824749	-1.21011	0.226238	0.998858
hsa-miR-21-3p	9.88795	0.448178	0.370382	1.21004	0.226263	0.998858
hsa-piR-30924	4.37739	-0.470196	0.388836	-1.20924	0.22657	0.998858
hsa-piR-19351	0.997128	-0.96797	0.801006	-1.20844	0.226877	0.998858
hsa-piR-1317	0.672593	-1.23178	1.01978	-1.20788	0.227093	0.998858
hsa-piR-8337	0.828023	0.996951	0.825411	1.20782	0.227115	0.998858
hsa-piR-8170	3.31358	-0.691701	0.573096	-1.20696	0.227449	0.998858
hsa-piR-26453	5.89706	-0.509404	0.422234	-1.20645	0.227644	0.998858
hsa-piR-20653	0.479263	-1.17043	0.970521	-1.20598	0.227825	0.998858
tRNA-Pro-TGG-4-1	31.3086	-0.472993	0.392539	-1.20496	0.228219	0.998858
hsa-piR-17170	1.5457	0.815331	0.677253	1.20388	0.228636	0.998858
hsa-piR-5144	1.12539	-0.880311	0.731478	-1.20347	0.228795	0.998858
hsa-piR-7622	0.410799	1.29738	1.07856	1.20288	0.229022	0.998858
hsa-piR-25485	0.755862	1.09822	0.913053	1.2028	0.229052	0.998858
hsa-piR-14621	1.14581	0.891668	0.741373	1.20273	0.229082	0.998858
hsa-piR-17800	1.12979	-0.852017	0.70972	-1.2005	0.229946	0.998858
hsa-miR-381-3p	28.637	0.365272	0.304342	1.2002	0.230061	0.998858
tRNA-Trp-CCA-2-1	64.2675	0.395898	0.329996	1.19971	0.230254	0.998858
hsa-piR-2129	0.505117	1.08967	0.908431	1.19951	0.230331	0.998858
hsa-miR-891b	35.4999	0.436395	0.363918	1.19916	0.230467	0.998858
hsa-piR-20678	0.497242	1.16451	0.97132	1.1989	0.230567	0.998858
hsa-piR-19187	5.93638	0.419189	0.349689	1.19875	0.230626	0.998858
hsa-piR-21508	0.859481	0.84581	0.707513	1.19547	0.231904	0.998858
hsa-piR-26495	0.818165	-0.96889	0.810514	-1.1954	0.23193	0.998858
hsa-piR-29894	0.572889	-1.19951	1.00404	-1.19469	0.232209	0.998858
tRNA-Pro-AGG-2-4	46.6751	-0.387791	0.324739	-1.19416	0.232413	0.998858
hsa-piR-8417	0.808298	-1.04902	0.878948	-1.1935	0.232675	0.998858
hsa-piR-26351	0.978848	-0.993784	0.832808	-1.19329	0.232755	0.998858
hsa-miR-4508	27.9694	-0.445647	0.373794	-1.19222	0.233173	0.998858
hsa-miR-1291	3.37686	-0.697733	0.585309	-1.19208	0.233231	0.998858
hsa-piR-4832	0.388854	-1.64846	1.38293	-1.192	0.233261	0.998858
hsa-piR-27701	3.04769	-0.926533	0.778274	-1.1905	0.233851	0.998858
5S_dup73_seq_1165	71.0525	0.21601	0.181736	1.18859	0.234601	0.998858
hsa-piR-32988	343.863	-0.325916	0.274755	-1.1862	0.235542	0.998858
tRNA-Cys-GCA-19-1	99.3664	-0.359266	0.303232	-1.18479	0.236101	0.998858
hsa-piR-10951	0.583849	1.11283	0.939868	1.18402	0.236403	0.998858
hsa-piR-5039	3.12695	-0.722739	0.610455	-1.18394	0.236439	0.998858
5S_seq_829	0.91051	-1.01927	0.861224	-1.18351	0.236607	0.998858
hsa-piR-97	0.399535	1.40015	1.18472	1.18184	0.237269	0.998858
hsa-piR-23282	0.258736	1.78618	1.51248	1.18096	0.23762	0.998858
hsa-miR-514a-3p	98.7667	0.560091	0.475031	1.17906	0.238373	0.998858
hsa-piR-4700	0.775746	-1.01003	0.856637	-1.17906	0.238373	0.998858
5S_dup52_seq_1545	89.8102	-0.292803	0.248379	-1.17886	0.238456	0.998858
hsa-piR-9929	0.509557	-1.28432	1.09033	-1.17792	0.23883	0.998858
hsa-piR-3097	0.712102	1.07062	0.909107	1.17766	0.238933	0.998858
hsa-piR-8979	4.23511	-0.446529	0.379459	-1.17675	0.239295	0.998858
hsa-piR-9334	0.704758	1.02303	0.869401	1.17671	0.239311	0.998858
hsa-piR-22122	0.724837	-1.2421	1.05576	-1.1765	0.239397	0.998858
hsa-piR-1613	64.1287	-0.353015	0.300547	-1.17458	0.240164	0.998858
5S_dup7_seq_1439	21.8019	0.282081	0.24023	1.17421	0.24031	0.998858
hsa-miR-372-3p	46.0653	0.407391	0.347045	1.17388	0.240441	0.998858
hsa-miR-505-5p	0.904899	-1.20967	1.03114	-1.17313	0.240742	0.998858
hsa-piR-7850	0.286931	-1.79082	1.52654	-1.17313	0.240746	0.998858
5S_dup63_seq_1560	18.061	-0.424278	0.361879	-1.17243	0.241025	0.998858
5S_dup15_seq_154	32.6232	0.261035	0.222678	1.17225	0.241096	0.998858
hsa-piR-20941	0.625012	-1.2333	1.05247	-1.17181	0.241272	0.998858
tRNA-Leu-AAG-4-1	297.568	-0.372849	0.318262	-1.17151	0.241392	0.998858
LSU-rRNA_Hsa_dup3_seq_1105	0.613959	-1.16812	0.998063	-1.17038	0.241847	0.998858
hsa-piR-22268	0.619632	-1.31312	1.12259	-1.16972	0.242113	0.998858
hsa-piR-28757	2.75539	0.57608	0.492653	1.16934	0.242266	0.998858
hsa-piR-27316	1.1466	-0.893303	0.764305	-1.16878	0.242493	0.998858
hsa-piR-6160	0.432049	-1.23606	1.05781	-1.16851	0.242601	0.998858
hsa-piR-25764	0.970145	0.897061	0.768076	1.16793	0.242834	0.998858
hsa-piR-11865	0.951408	0.917353	0.785826	1.16737	0.243059	0.998858
hsa-piR-24931	0.306278	1.31684	1.1293	1.16607	0.243587	0.998858
LSU-rRNA_Hsa_seq_1493	0.605827	0.998339	0.856171	1.16605	0.243594	0.998858
hsa-piR-4829	0.935771	-0.92231	0.791427	-1.16538	0.243867	0.998858
hsa-piR-518	0.320459	-1.34918	1.15844	-1.16465	0.244161	0.998858
tRX-Lys-NNN-6-1	3.68915	-0.524715	0.450582	-1.16453	0.24421	0.998858
hsa-piR-3214	3.95774	0.700095	0.601316	1.16427	0.244314	0.998858
hsa-piR-33188	3.04146	-0.607539	0.521898	-1.16409	0.244386	0.998858
hsa-miR-518f-5p	0.520303	1.16463	1.00084	1.16365	0.244566	0.998858
hsa-piR-13726	1.21352	0.840712	0.72275	1.16321	0.244743	0.998858
hsa-piR-4696	1.57074	-0.799485	0.687349	-1.16314	0.244772	0.998858
hsa-piR-17476	7.98543	-0.379196	0.326416	-1.1617	0.245359	0.998858
5S_dup37_seq_255	5.84704	-0.386971	0.333281	-1.1611	0.245603	0.998858
hsa-piR-9220	0.969231	0.840888	0.724985	1.15987	0.246102	0.998858
tRNA-Pro-TGG-3-4	252.864	-0.372812	0.321568	-1.15936	0.24631	0.998858
hsa-piR-2099	1.64077	-0.721691	0.62303	-1.15836	0.246719	0.998858
hsa-piR-1403	0.670593	0.99006	0.854827	1.1582	0.246783	0.998858
hsa-piR-2311	0.854588	1.0109	0.873357	1.15749	0.247072	0.998858
hsa-piR-33092	46.9692	-0.559337	0.483425	-1.15703	0.24726	0.998858
5S_dup43_seq_758	64.7762	0.284012	0.245495	1.1569	0.247315	0.998858
LSU-rRNA_Hsa_dup11_seq_857	0.555339	-1.15031	0.994338	-1.15686	0.247331	0.998858
hsa-miR-501-3p	24.3877	0.318508	0.275337	1.15679	0.247358	0.998858
5S_dup13_seq_1499	8.94523	-0.29066	0.251494	-1.15573	0.24779	0.998858
hsa-piR-19299	0.582563	1.07777	0.932685	1.15555	0.247864	0.998858
5S_dup47_seq_266	94.6723	-0.293734	0.254304	-1.15505	0.248069	0.998858
5S_dup39_seq_629	65.5962	-0.29307	0.253798	-1.15474	0.248197	0.998858
hsa-piR-29790	0.599428	-1.10228	0.955999	-1.15301	0.248906	0.998858
hsa-piR-5841	0.882904	-1.00104	0.868435	-1.15269	0.249037	0.998858
5S_dup52_seq_1141	2.03333	0.767843	0.666329	1.15235	0.249178	0.998858
hsa-piR-25096	0.819993	-1.05287	0.913712	-1.1523	0.249196	0.998858
hsa-piR-112	0.644931	1.02918	0.893725	1.15156	0.249502	0.998858
hsa-piR-13732	1.00707	-0.845704	0.734462	-1.15146	0.249543	0.998858
hsa-piR-33038	1.79833	-0.861248	0.748165	-1.15115	0.249671	0.998858
tRNA-Lys-TTT-9-1	1.59616	-0.835403	0.7275	-1.14832	0.250836	0.998858
hsa-piR-9957	1.61234	-0.679592	0.59182	-1.14831	0.250841	0.998858
hsa-piR-11876	3.71369	0.536382	0.467452	1.14746	0.251192	0.998858
hsa-miR-377-3p	1.10445	-0.903998	0.788047	-1.14714	0.251325	0.998858
hsa-piR-9928	1.90785	-0.728297	0.63574	-1.14559	0.251965	0.998858
5S_dup48_seq_1138	7.31177	0.404612	0.353425	1.14483	0.252279	0.998858
tRNA-Pro-CGG-2-1	69.4598	-0.417076	0.364546	-1.1441	0.252583	0.998858
5S_dup119_seq_126	9.50664	0.348581	0.304751	1.14382	0.252697	0.998858
hsa-miR-425-5p	121.619	0.24076	0.21052	1.14364	0.252772	0.998858
5S_dup31_seq_45	112.359	-0.255286	0.223388	-1.14279	0.253125	0.998858
hsa-piR-22231	0.403725	1.33768	1.17066	1.14268	0.253173	0.998858
hsa-piR-17044	1.99198	-0.603573	0.528851	-1.14129	0.253749	0.998858
hsa-piR-24199	0.342551	1.39217	1.21984	1.14127	0.253758	0.998858
hsa-miR-4680-5p	0.616631	1.05123	0.921586	1.14067	0.254007	0.998858
hsa-piR-29855	0.72167	-1.12661	0.988237	-1.14002	0.254277	0.998858
hsa-piR-26780	0.705215	-1.33336	1.16975	-1.13986	0.254344	0.998858
hsa-piR-26513	0.781519	0.901644	0.791055	1.1398	0.25437	0.998858
hsa-piR-4085	1.56655	-0.712114	0.624783	-1.13978	0.254379	0.998858
hsa-piR-26913	0.565532	1.12461	0.986762	1.13969	0.254414	0.998858
hsa-piR-32978	67.4339	-0.319007	0.280013	-1.13926	0.254595	0.998858
5S_dup32_seq_943	9.55279	-0.320691	0.281531	-1.1391	0.254662	0.998858
hsa-piR-32575	10.7414	-0.57728	0.506994	-1.13863	0.254857	0.998858
5S_dup6_seq_836	65.0224	-0.291499	0.256231	-1.13764	0.255271	0.998858
hsa-piR-11298	5.02637	-0.940856	0.827806	-1.13657	0.255719	0.998858
hsa-piR-15738	6.78849	-0.458921	0.403895	-1.13624	0.255857	0.998858
hsa-piR-20960	1.24409	0.74138	0.653306	1.13481	0.256454	0.998858
hsa-piR-9846	0.261206	1.41066	1.24434	1.13366	0.256935	0.998858
hsa-piR-3354	0.519234	-1.06627	0.940836	-1.13332	0.257078	0.998858
hsa-miR-708-5p	0.437017	1.56754	1.38329	1.1332	0.257129	0.998858
hsa-piR-2893	0.394101	-1.69069	1.49221	-1.13301	0.257212	0.998858
hsa-piR-16867	0.590682	-1.08026	0.953721	-1.13268	0.257351	0.998858
hsa-miR-370-3p	1.90066	-0.669418	0.591096	-1.1325	0.257423	0.998858
hsa-piR-9560	0.701121	1.01633	0.898122	1.13161	0.257796	0.998858
hsa-piR-28368	1.13456	-0.803646	0.710443	-1.13119	0.257975	0.998858
hsa-piR-30802	7.21615	-0.454053	0.401483	-1.13094	0.258081	0.998858
hsa-piR-21108	0.483696	1.20041	1.06158	1.13078	0.258149	0.998858
hsa-piR-6321	0.483604	-1.12727	0.997964	-1.12957	0.258659	0.998858
hsa-piR-10596	0.644878	-1.07085	0.948304	-1.12922	0.258804	0.998858
hsa-piR-9476	1.41731	-0.818765	0.725337	-1.12881	0.25898	0.998858
5S_dup65_seq_1562	14.9484	-0.493514	0.438037	-1.12665	0.259891	0.998858
hsa-miR-4326	1.07646	-0.910148	0.808096	-1.12629	0.260044	0.998858
LSU-rRNA_Hsa_dup8_seq_484	8.89064	0.355726	0.316104	1.12534	0.260444	0.998858
hsa-piR-15942	2.79612	-0.69314	0.616643	-1.12405	0.26099	0.998858
hsa-miR-654-3p	1.00445	-0.946973	0.843182	-1.1231	0.261397	0.998858
5S_dup59_seq_355	1.94532	-0.741609	0.660381	-1.123	0.261437	0.998858
hsa-piR-12626	0.912156	-0.920029	0.820085	-1.12187	0.261917	0.998858
hsa-piR-32124	1.32914	0.783633	0.698974	1.12112	0.262237	0.998858
hsa-miR-522-3p	9.93147	-0.432813	0.38613	-1.1209	0.262331	0.998858
hsa-miR-146b-5p	545.731	0.242766	0.216733	1.12012	0.262665	0.998858
hsa-piR-20970	1.75823	-0.789459	0.705286	-1.11935	0.262993	0.998858
hsa-miR-215-5p	96.5604	0.426401	0.381165	1.11868	0.263278	0.998858
hsa-piR-32889	2.77593	0.507384	0.453615	1.11853	0.263339	0.998858
hsa-miR-6718-5p	0.788527	0.931872	0.833367	1.1182	0.263481	0.998858
hsa-piR-30916	0.640716	-1.05658	0.946369	-1.11646	0.264226	0.998858
hsa-piR-16841	5.71064	-0.461864	0.413789	-1.11618	0.264345	0.998858
hsa-piR-26314	0.307383	-1.3621	1.22053	-1.11599	0.264425	0.998858
hsa-piR-21873	0.728936	1.01046	0.906501	1.11468	0.264987	0.998858
tRNA-Arg-TCT-2-1	6.7171	0.413665	0.371558	1.11333	0.265568	0.998858
hsa-piR-21710	1.53537	-0.700656	0.629475	-1.11308	0.265674	0.998858
5S_dup34_seq_748	64.7533	0.216771	0.194896	1.11224	0.266036	0.998858
hsa-piR-4917	2.70746	-0.527986	0.47474	-1.11216	0.26607	0.998858
hsa-piR-22151	0.511046	1.22299	1.09987	1.11195	0.266161	0.998858
tRNA-Trp-CCA-1-1	15.6247	0.367018	0.330288	1.1112	0.26648	0.998858
hsa-miR-550a-3p	0.574644	1.03691	0.934209	1.10993	0.26703	0.998858
hsa-piR-15587	0.267776	1.27026	1.14471	1.10967	0.267141	0.998858
hsa-miR-660-5p	68.5223	0.354139	0.319434	1.10864	0.267584	0.998858
hsa-piR-2820	4.68155	-0.652355	0.588496	-1.10851	0.267641	0.998858
5S_dup17_seq_725	1.13347	0.817478	0.737535	1.10839	0.267693	0.998858
hsa-miR-20b-3p	1.15121	-0.872385	0.787396	-1.10794	0.267889	0.998858
hsa-miR-152-5p	0.461997	-1.2368	1.11725	-1.107	0.268294	0.998858
hsa-miR-30a-3p	145.922	-0.307545	0.277979	-1.10636	0.26857	0.998858
5S_dup53_seq_1337	3.91973	-0.420776	0.380384	-1.10619	0.268646	0.998858
hsa-piR-11389	0.650351	0.936546	0.846735	1.10607	0.268698	0.998858
hsa-piR-8779	8.08942	0.472518	0.427379	1.10562	0.268891	0.998858
hsa-piR-20618	0.783442	-0.931675	0.842759	-1.10551	0.268941	0.998858
hsa-piR-24596	2.27639	-0.54746	0.495239	-1.10544	0.268967	0.998858
hsa-piR-1654	4.77612	-0.438739	0.397048	-1.105	0.269158	0.998858
hsa-miR-873-5p	102.619	-0.288331	0.261005	-1.1047	0.269291	0.998858
tRNA-Cys-GCA-10-1	110.747	-0.348856	0.316059	-1.10377	0.269694	0.998858
hsa-piR-29369	0.498134	1.07054	0.970001	1.10365	0.269746	0.998858
SSU-rRNA_Hsa_seq_1566	4960.48	0.0914623	0.0828758	1.10361	0.269763	0.998858
5S_dup8_seq_420	1.13299	0.714625	0.647691	1.10334	0.269878	0.998858
hsa-miR-552-5p	19.9536	-0.463509	0.420172	-1.10314	0.269966	0.998858
tRNA-Asn-GTT-18-1	0.944507	0.765194	0.694751	1.10139	0.270725	0.998858
hsa-miR-656-3p	0.721209	-1.0442	0.949417	-1.09983	0.271406	0.998858
tRNA-Asn-GTT-16-1	1.01886	-1.0162	0.924348	-1.09937	0.271607	0.998858
5S_dup22_seq_931	7.20211	0.415095	0.377939	1.09831	0.272068	0.998858
hsa-piR-20083	6.47161	-0.526036	0.479073	-1.09803	0.272193	0.998858
hsa-piR-17979	2.95113	-0.688571	0.627344	-1.0976	0.27238	0.998858
tRNA-Met-CAT-5-1	10.2881	-0.482783	0.440224	-1.09668	0.272783	0.998858
hsa-piR-18697	0.281075	1.44951	1.32228	1.09622	0.272982	0.998858
hsa-piR-5639	0.635451	0.949148	0.865983	1.09604	0.273063	0.998858
hsa-piR-30603	4.61092	-0.549069	0.501181	-1.09555	0.273276	0.998858
hsa-piR-947	0.333485	1.42924	1.30488	1.0953	0.273384	0.998858
hsa-piR-28523	1.20008	0.822161	0.751328	1.09428	0.273834	0.998858
hsa-piR-10577	0.901094	-0.833779	0.762268	-1.09381	0.274037	0.998858
hsa-miR-3182	8.24181	0.346095	0.316474	1.0936	0.274131	0.998858
hsa-piR-12455	1.29641	-0.686565	0.62827	-1.09279	0.274487	0.998858
hsa-piR-10728	0.3284	1.30484	1.19426	1.09259	0.274575	0.998858
hsa-piR-23933	1.42715	-0.732449	0.670801	-1.0919	0.274876	0.998858
hsa-piR-23281	4.46983	-0.427939	0.392039	-1.09157	0.275021	0.998858
hsa-piR-18020	8.17713	-0.518615	0.475733	-1.09014	0.275652	0.998858
hsa-piR-24701	2.28154	-0.546402	0.501695	-1.08911	0.276105	0.998858
hsa-piR-11711	2.10707	-0.591391	0.54341	-1.0883	0.276465	0.998858
hsa-piR-3871	1.08895	-0.875752	0.804709	-1.08828	0.27647	0.998858
hsa-piR-32949	0.911903	-1.00031	0.91938	-1.08803	0.276583	0.998858
hsa-piR-19261	0.648976	-0.927405	0.852647	-1.08768	0.276738	0.998858
tRNA-Cys-GCA-14-1	109.783	-0.317431	0.292021	-1.08701	0.27703	0.998858
hsa-piR-12746	0.606466	-0.985819	0.907306	-1.08653	0.277243	0.998858
hsa-piR-16096	0.418913	1.30002	1.1977	1.08543	0.277732	0.998858
hsa-piR-18082	0.224023	1.66	1.52988	1.08505	0.277897	0.998858
hsa-piR-2812	0.83237	-0.909806	0.838523	-1.08501	0.277917	0.998858
hsa-piR-20411	1.11698	-0.733321	0.675936	-1.0849	0.277967	0.998858
hsa-miR-210-5p	0.701812	0.916115	0.84545	1.08358	0.27855	0.998858
hsa-miR-520a-3p	39.4631	0.323563	0.298772	1.08298	0.278818	0.998858
tRNA-Lys-CTT-15-1	1.08936	-0.827369	0.764971	-1.08157	0.279444	0.998858
SSU-rRNA_Hsa_seq_1087	0.896899	0.872638	0.807703	1.0804	0.279966	0.998858
5S_dup42_seq_1326	44.8105	0.23201	0.214922	1.07951	0.280361	0.998858
tRNA-Pro-CGG-1-2	70.7882	-0.349562	0.323869	-1.07933	0.28044	0.998858
hsa-piR-9062	0.944458	-0.853092	0.790481	-1.07921	0.280496	0.998858
hsa-piR-29891	0.878753	0.984885	0.913775	1.07782	0.281114	0.998858
hsa-piR-29881	0.843688	0.862773	0.800563	1.07771	0.281164	0.998858
hsa-piR-19399	0.481865	-1.25551	1.16569	-1.07705	0.281457	0.998858
hsa-piR-15239	0.749079	0.893575	0.82987	1.07677	0.281585	0.998858
LSU-rRNA_Hsa_dup25_seq_823	160.364	-0.218291	0.202783	-1.07648	0.281714	0.998858
5S_dup39_seq_1530	0.831819	-1.02604	0.953301	-1.0763	0.281791	0.998858
tRNA-Arg-TCT-3-1	21.5154	0.329899	0.306516	1.07628	0.281801	0.998858
hsa-piR-8331	1.73321	-0.652541	0.606515	-1.07589	0.281978	0.998858
hsa-piR-26614	5.20807	0.480217	0.44714	1.07398	0.282834	0.998858
hsa-miR-363-5p	3.83712	-0.577768	0.538238	-1.07344	0.283072	0.998858
hsa-piR-5763	1.6103	0.68078	0.63476	1.0725	0.283495	0.998858
hsa-miR-151a-3p	151.471	0.21163	0.197457	1.07178	0.28382	0.998858
hsa-piR-4349	0.465716	-1.22514	1.14382	-1.07109	0.284127	0.998858
5S_dup20_seq_31	49.7644	0.247007	0.230614	1.07109	0.28413	0.998858
hsa-piR-24720	1.70921	0.617055	0.576616	1.07013	0.28456	0.998858
hsa-piR-31853	0.335843	1.20027	1.12167	1.07007	0.284588	0.998858
hsa-piR-12031	0.431387	-1.05736	0.988161	-1.07003	0.284605	0.998858
hsa-piR-23206	6.89468	-0.511174	0.478069	-1.06925	0.284959	0.998858
5S_dup16_seq_1451	3.40562	0.593816	0.555473	1.06903	0.285057	0.998858
hsa-piR-13011	8.59008	-0.422301	0.395311	-1.06827	0.285397	0.998858
hsa-piR-15806	1.07201	-0.838405	0.786089	-1.06655	0.286174	0.998858
hsa-piR-13988	2.83399	-0.501315	0.470795	-1.06483	0.286955	0.998858
hsa-piR-22847	0.846588	-0.778006	0.731285	-1.06389	0.287379	0.998858
hsa-piR-10776	0.816522	-1.01104	0.95112	-1.063	0.287782	0.998858
hsa-piR-5124	4.64092	-0.433985	0.408311	-1.06288	0.287837	0.998858
hsa-piR-8890	0.697921	1.0809	1.01748	1.06233	0.288086	0.998858
hsa-miR-29c-3p	47.2719	0.360394	0.339424	1.06178	0.288336	0.998858
5S_dup1_seq_1082	1.27823	0.785117	0.7397	1.0614	0.288508	0.998858
hsa-piR-6462	0.828746	-0.858527	0.809073	-1.06112	0.288634	0.998858
hsa-piR-4581	16.2435	0.247879	0.233617	1.06105	0.288667	0.998858
5S_dup5_seq_9	1.92848	0.683694	0.644395	1.06099	0.288696	0.998858
hsa-piR-13667	0.707846	-1.03578	0.976571	-1.06063	0.28886	0.998858
hsa-piR-12148	0.253396	1.43539	1.35345	1.06055	0.288896	0.998858
hsa-miR-152-3p	323.589	0.283209	0.267114	1.06025	0.289029	0.998858
hsa-piR-26459	0.343279	-1.15021	1.08566	-1.05945	0.289393	0.998858
hsa-piR-25497	1.07571	0.703805	0.664763	1.05873	0.289722	0.998858
hsa-piR-16039	0.356519	-1.21637	1.15074	-1.05704	0.290494	0.998858
hsa-piR-29326	0.393396	-1.29576	1.22655	-1.05642	0.290774	0.998858
hsa-piR-21086	0.576025	1.21596	1.1511	1.05635	0.290808	0.998858
hsa-miR-101-3p	1360.47	0.267207	0.253135	1.05559	0.291156	0.998858
hsa-piR-8613	0.523425	-1.26367	1.19747	-1.05529	0.291294	0.998858
hsa-miR-6501-5p	0.324719	1.63593	1.55109	1.0547	0.291563	0.998858
hsa-piR-548	0.691951	-0.994586	0.943137	-1.05455	0.29163	0.998858
hsa-piR-15183	10.2099	-0.388118	0.368062	-1.05449	0.291659	0.998858
hsa-piR-32883	17.9094	-0.365325	0.346475	-1.05441	0.291697	0.998858
5S_dup81_seq_804	1.268	-0.714145	0.678148	-1.05308	0.292303	0.998858
hsa-piR-25077	1.23868	-0.822467	0.781461	-1.05247	0.292582	0.998858
hsa-piR-8042	2.59174	-0.516788	0.491186	-1.05212	0.292743	0.998858
hsa-miR-345-5p	13.0673	0.412901	0.392564	1.0518	0.29289	0.998858
hsa-piR-28819	3.44145	-0.539742	0.513255	-1.05161	0.29298	0.998858
LSU-rRNA_Hsa_dup9_seq_942	20.2308	0.227528	0.216516	1.05086	0.293323	0.998858
hsa-piR-24763	2.46007	-0.529888	0.504852	-1.04959	0.293906	0.998858
hsa-piR-4564	0.54991	1.0954	1.04422	1.04901	0.294172	0.998858
tRNA-Trp-CCA-4-1	352.296	-0.386821	0.368788	-1.0489	0.294226	0.998858
hsa-miR-625-5p	29.9689	-0.41005	0.391083	-1.0485	0.29441	0.998858
5S_dup1_seq_830	4.11385	-0.395535	0.377412	-1.04802	0.29463	0.998858
hsa-miR-30b-5p	178.29	0.318472	0.304004	1.04759	0.294826	0.998858
hsa-piR-28221	2.69818	-0.579455	0.553305	-1.04726	0.294979	0.998858
5S_dup5_seq_1569	92.4617	0.24785	0.236678	1.0472	0.295006	0.998858
hsa-piR-9446	1.17297	0.845278	0.807588	1.04667	0.295252	0.998858
hsa-piR-25416	0.578072	-1.06684	1.01936	-1.04657	0.295296	0.998858
hsa-piR-5350	1.38074	-0.735606	0.702902	-1.04653	0.295318	0.998858
LSU-rRNA_Hsa_dup18_seq_333	0.356416	1.13922	1.08887	1.04624	0.295449	0.998858
5S_dup26_seq_1463	5.7533	0.380255	0.363486	1.04613	0.2955	0.998858
hsa-piR-26055	2.41209	-0.559442	0.534917	-1.04585	0.295631	0.998858
hsa-miR-519a-3p	0.907177	0.814422	0.778855	1.04567	0.295715	0.998858
hsa-piR-5558	0.459163	-1.09591	1.04812	-1.0456	0.295746	0.998858
hsa-miR-92a-1-5p	0.398255	1.11094	1.06296	1.04514	0.29596	0.998858
hsa-piR-27381	1.4871	-0.664862	0.636477	-1.0446	0.29621	0.998858
hsa-piR-25860	0.863805	-0.862294	0.82557	-1.04448	0.296262	0.998858
hsa-piR-25027	0.304454	1.63739	1.56895	1.04362	0.296659	0.998858
tRNA-Lys-TTT-3-4	2249.33	0.259338	0.248554	1.04339	0.296768	0.998858
hsa-miR-139-5p	9.84945	-0.458226	0.43921	-1.0433	0.296811	0.998858
hsa-piR-18801	0.66366	-0.944035	0.905514	-1.04254	0.297161	0.998858
hsa-piR-18111	1.37196	0.653942	0.627324	1.04243	0.297212	0.998858
hsa-piR-8432	0.533802	0.98003	0.940274	1.04228	0.297281	0.998858
hsa-piR-19100	0.446805	1.14393	1.09764	1.04218	0.297329	0.998858
5S_dup46_seq_963	0.540731	-1.1947	1.14646	-1.04208	0.297375	0.998858
5S_dup7_seq_12	50.7599	0.425906	0.408778	1.0419	0.297459	0.998858
hsa-piR-32935	0.417962	1.09526	1.0514	1.04172	0.297543	0.998858
SSU-rRNA_Hsa_dup1_seq_932	2.13987	0.537584	0.516134	1.04156	0.297616	0.998858
LSU-rRNA_Hsa_seq_878	176.462	-0.220846	0.212088	-1.04129	0.297739	0.998858
hsa-piR-16188	1.12747	-0.865785	0.831453	-1.04129	0.29774	0.998858
hsa-piR-7373	0.483582	-1.19583	1.14878	-1.04095	0.297898	0.998858
LSU-rRNA_Hsa_dup8_seq_743	373.305	0.181469	0.174439	1.0403	0.298199	0.998858
hsa-piR-6008	0.803577	-0.898483	0.863752	-1.04021	0.298242	0.998858
hsa-piR-23803	0.51769	-1.05025	1.00979	-1.04006	0.298311	0.998858
hsa-piR-7704	4.9671	-0.414575	0.39913	-1.0387	0.298946	0.998858
hsa-piR-24697	0.31914	1.24631	1.19992	1.03866	0.298961	0.998858
hsa-piR-786	1.21489	-0.768769	0.740174	-1.03863	0.298976	0.998858
hsa-miR-34c-5p	7167.54	0.306846	0.295541	1.03825	0.299153	0.998858
hsa-piR-21284	0.884598	-0.948231	0.913451	-1.03808	0.299235	0.998858
hsa-piR-30561	0.603068	-1.06081	1.0222	-1.03777	0.299377	0.998858
5S_dup16_seq_1027	7.42438	-0.398393	0.383961	-1.03759	0.299463	0.998858
hsa-piR-17695	0.625721	0.956612	0.922151	1.03737	0.299563	0.998858
tRNA-Pro-AGG-2-5	168.657	-0.321018	0.30953	-1.03711	0.299683	0.998858
hsa-piR-20936	0.963943	0.88697	0.855773	1.03645	0.29999	0.998858
5S_dup5_seq_1086	1.35252	-0.649527	0.626933	-1.03604	0.300184	0.998858
hsa-miR-6507-5p	1.01401	-0.945514	0.913688	-1.03483	0.300747	0.998858
hsa-piR-2485	0.208141	-1.46473	1.41563	-1.03468	0.300818	0.998858
5S_dup11_seq_150	22.7461	0.223194	0.21573	1.0346	0.300857	0.998858
5S_dup59_seq_80	31.1623	0.393554	0.380744	1.03364	0.301303	0.998858
5S_dup55_seq_1144	213.162	-0.197277	0.190863	-1.0336	0.301322	0.998858
hsa-piR-16654	1.96213	-0.606683	0.587252	-1.03309	0.301563	0.998858
hsa-miR-31-3p	1.27416	0.774422	0.749637	1.03306	0.301574	0.998858
hsa-piR-25727	1.45891	-0.604054	0.584999	-1.03257	0.301804	0.998858
5S_dup10_seq_289	80.813	0.217172	0.210411	1.03213	0.302011	0.998858
LSU-rRNA_Hsa_dup12_seq_956	259.417	0.215016	0.208375	1.03187	0.302132	0.998858
tRNA-Pro-AGG-2-2	47.2304	-0.315721	0.306022	-1.03169	0.302216	0.998858
hsa-piR-26603	3.46129	-0.484619	0.469982	-1.03115	0.302473	0.998858
hsa-piR-26496	8.9722	0.365577	0.354955	1.02993	0.303045	0.998858
hsa-piR-11194	0.329624	1.16852	1.13472	1.02979	0.303109	0.998858
hsa-piR-13099	0.824289	0.802219	0.779236	1.02949	0.303248	0.998858
hsa-piR-6546	1.1368	0.707631	0.68791	1.02867	0.303635	0.998858
hsa-miR-365a-3p	8.97699	0.41314	0.401909	1.02795	0.303975	0.998858
hsa-piR-16314	1.99921	-0.552623	0.538254	-1.0267	0.304564	0.998858
hsa-piR-24807	0.711599	-0.913956	0.890348	-1.02651	0.304649	0.998858
hsa-piR-17819	3.91875	0.442645	0.431338	1.02621	0.304791	0.998858
5S_dup22_seq_33	0.799244	-0.872433	0.850494	-1.0258	0.304988	0.998858
hsa-piR-13092	8.41687	-0.375146	0.366785	-1.02279	0.306406	0.998858
hsa-piR-27553	1.20323	-0.716509	0.700554	-1.02277	0.306415	0.998858
5S_dup53_seq_1406	0.46783	-1.07226	1.04929	-1.02189	0.306833	0.998858
5S_dup50_seq_69	21.7625	-0.278191	0.272554	-1.02068	0.307405	0.998858
hsa-piR-11238	0.345246	-1.56586	1.53452	-1.02042	0.30753	0.998858
hsa-piR-4398	0.92177	-0.712332	0.698363	-1.02	0.307727	0.998858
hsa-miR-216a-5p	1.13189	-0.950467	0.934766	-1.0168	0.30925	0.998858
hsa-piR-9627	4.51797	-0.352139	0.346418	-1.01651	0.309385	0.998858
hsa-piR-32902	13.4222	-0.36677	0.360912	-1.01623	0.309518	0.998858
hsa-piR-19171	3.78521	-0.535181	0.526712	-1.01608	0.309592	0.998858
hsa-piR-28913	0.315808	1.37368	1.35199	1.01604	0.309611	0.998858
hsa-piR-6202	2.79644	-0.454388	0.447466	-1.01547	0.309882	0.998858
hsa-piR-18928	1.89411	0.595099	0.586434	1.01478	0.310212	0.998858
5S_dup79_seq_1005	1.45432	-0.653598	0.644152	-1.01467	0.310265	0.998858
hsa-piR-11548	0.956541	0.742355	0.731679	1.01459	0.310301	0.998858
hsa-miR-27a-5p	0.839842	0.899387	0.887148	1.0138	0.31068	0.998858
5S_dup86_seq_812	1.16402	-0.713241	0.703893	-1.01328	0.310926	0.998858
hsa-piR-6616	0.337711	-1.56939	1.55029	-1.01232	0.311384	0.998858
hsa-piR-32911	1878.22	-0.181405	0.179222	-1.01218	0.311452	0.998858
hsa-piR-10716	0.401592	1.13541	1.12203	1.01193	0.311574	0.998858
hsa-piR-4502	0.301468	1.21857	1.20431	1.01184	0.311615	0.998858
hsa-piR-3399	10.5873	-0.357563	0.353418	-1.01173	0.311668	0.998858
hsa-miR-449b-5p	3.04681	0.484332	0.478789	1.01158	0.31174	0.998858
hsa-miR-4773	0.829271	0.887273	0.877459	1.01118	0.311928	0.998858
tRNA-Cys-GCA-13-1	108.525	-0.307993	0.304807	-1.01045	0.31228	0.998858
hsa-piR-23044	0.52827	1.11961	1.10821	1.01029	0.312357	0.998858
hsa-piR-12363	1.33143	-0.667375	0.660765	-1.01	0.312494	0.998858
hsa-piR-28751	2.38994	-0.630077	0.623931	-1.00985	0.312566	0.998858
hsa-piR-18778	0.658997	-1.00209	0.992513	-1.00965	0.312662	0.998858
hsa-piR-28586	0.286555	-1.42415	1.41107	-1.00927	0.312845	0.998858
tRNA-Pro-AGG-2-8	44.9754	-0.321916	0.319092	-1.00885	0.313047	0.998858
tRNA-Pro-AGG-1-1	46.3538	-0.292908	0.290395	-1.00865	0.313141	0.998858
hsa-piR-30393	0.737948	-0.924252	0.916428	-1.00854	0.313196	0.998858
hsa-piR-13597	0.913525	0.722426	0.717144	1.00737	0.313759	0.998858
hsa-piR-487	0.972015	-0.828285	0.822429	-1.00712	0.313877	0.998858
5S_dup18_seq_693	2.28019	-0.543142	0.539542	-1.00667	0.314091	0.998858
hsa-piR-29590	3.34983	0.483089	0.479908	1.00663	0.314113	0.998858
hsa-piR-25300	0.816611	-1.0463	1.03971	-1.00634	0.314254	0.998858
hsa-piR-24011	0.34953	-1.19883	1.19156	-1.0061	0.314368	0.998858
5S_dup71_seq_95	10.2873	-0.290504	0.288796	-1.00591	0.314458	0.998858
hsa-piR-4830	2.8951	-0.499283	0.49656	-1.00548	0.314664	0.998858
5S_dup36_seq_253	1.93056	0.544792	0.542205	1.00477	0.315007	0.998858
hsa-piR-33016	2.67946	-0.543122	0.540788	-1.00432	0.315226	0.998858
hsa-piR-32105	6.4454	-0.560104	0.557784	-1.00416	0.315302	0.998858
hsa-miR-217-5p	3.94313	0.498471	0.496455	1.00406	0.315349	0.998858
hsa-miR-6125	0.490117	1.03029	1.02672	1.00347	0.315633	0.998858
hsa-piR-28597	3.3646	-0.493154	0.491998	-1.00235	0.316175	0.998858
hsa-piR-6190	0.490753	-1.00884	1.0067	-1.00213	0.316283	0.998858
hsa-piR-17442	2.15517	0.576895	0.575688	1.0021	0.316296	0.998858
5S_dup25_seq_935	5.69849	-0.327794	0.327162	-1.00193	0.316377	0.998858
tRNA-Ser-TGA-3-1	175.249	0.24067	0.240209	1.00192	0.316382	0.998858
hsa-piR-15997	0.616629	0.917952	0.916333	1.00177	0.316456	0.998858
5S_dup5_seq_1176	168.98	0.292219	0.291816	1.00138	0.316642	0.998858
hsa-piR-10107	1.50005	0.723077	0.723576	0.999311	0.317644	0.998858
hsa-piR-28775	7.81009	-0.348343	0.348681	-0.999029	0.31778	0.998858
5S_dup54_seq_1246	148.738	0.353385	0.354232	0.997609	0.318469	0.998858
hsa-piR-9766	20.234	0.60662	0.608346	0.997163	0.318686	0.998858
5S_dup13_seq_1358	15.9227	0.210291	0.210944	0.996905	0.318811	0.998858
hsa-piR-1083	0.28769	-1.48555	1.49034	-0.996785	0.318869	0.998858
SSU-rRNA_Hsa_dup5_seq_865	658.43	0.152743	0.153236	0.996779	0.318872	0.998858
hsa-piR-31191	2.2408	-0.554721	0.55652	-0.996769	0.318877	0.998858
5S_dup56_seq_1249	3.82862	0.507187	0.509427	0.995603	0.319443	0.998858
hsa-piR-5055	0.603217	-1.01287	1.0178	-0.995148	0.319664	0.998858
hsa-piR-16890	0.886361	-0.803711	0.807949	-0.994755	0.319855	0.998858
hsa-miR-107	41.5233	0.245366	0.246661	0.994748	0.319859	0.998858
hsa-piR-24912	0.422162	-1.16106	1.1672	-0.99474	0.319863	0.998858
5S_seq_1081	20.0545	-0.202715	0.203847	-0.994444	0.320007	0.998858
5S_seq_407	0.477779	-1.06701	1.07312	-0.994308	0.320073	0.998858
hsa-piR-14127	0.781329	0.851427	0.856334	0.994271	0.320091	0.998858
LSU-rRNA_Hsa_dup2_seq_1030	8083.1	-0.138113	0.138942	-0.994029	0.320209	0.998858
hsa-piR-2536	0.405783	1.05219	1.05948	0.99312	0.320651	0.998858
hsa-piR-21442	0.899065	-0.859906	0.865914	-0.993062	0.32068	0.998858
hsa-miR-135b-3p	0.372613	1.0323	1.03952	0.993051	0.320685	0.998858
tRNA-Asp-GTC-2-6	258.884	-0.288799	0.290992	-0.992466	0.32097	0.998858
hsa-piR-26057	0.966335	-0.862123	0.86911	-0.991961	0.321217	0.998858
hsa-piR-10665	0.459839	-1.07183	1.08073	-0.991766	0.321312	0.998858
hsa-piR-25133	1.15356	-0.802283	0.808954	-0.991753	0.321318	0.998858
hsa-piR-12786	0.69181	-0.87695	0.884711	-0.991228	0.321574	0.998858
hsa-piR-30354	2.07135	-0.606069	0.611623	-0.99092	0.321725	0.998858
hsa-piR-4426	0.465107	-1.16057	1.17168	-0.990521	0.32192	0.998858
hsa-miR-517b-3p	5.6576	0.410148	0.414296	0.989988	0.32218	0.998858
hsa-piR-29742	6.86919	-0.366498	0.37101	-0.987839	0.323232	0.998858
hsa-piR-7362	0.740984	0.885143	0.89622	0.987641	0.323329	0.998858
hsa-piR-23762	4.39307	0.386827	0.391724	0.987497	0.323399	0.998858
hsa-piR-4802	1.62106	0.554839	0.561959	0.98733	0.323481	0.998858
hsa-piR-8520	0.459673	-0.997624	1.01111	-0.986663	0.323808	0.998858
hsa-piR-2055	0.421845	-1.06889	1.08564	-0.984569	0.324836	0.998858
hsa-piR-33021	0.929772	-0.772294	0.784404	-0.984561	0.32484	0.998858
hsa-piR-20476	0.346526	-1.24105	1.26287	-0.982724	0.325743	0.998858
hsa-piR-7198	1.13749	0.798618	0.813046	0.982255	0.325974	0.998858
hsa-piR-12613	2.14353	-0.622591	0.635983	-0.978942	0.327609	0.998858
LSU-rRNA_Hsa_dup12_seq_1053	130.302	0.225181	0.230074	0.978731	0.327713	0.998858
hsa-piR-10674	11.0544	-0.293953	0.300719	-0.977501	0.328321	0.998858
hsa-piR-2939	0.278362	-1.20837	1.23714	-0.976746	0.328695	0.998858
hsa-piR-13895	0.264755	1.51673	1.55438	0.975781	0.329173	0.998858
hsa-miR-93-5p	191.475	0.241873	0.247908	0.975658	0.329234	0.998858
hsa-miR-125a-3p	1.28589	0.74887	0.768654	0.974262	0.329927	0.998858
5S_dup11_seq_372	0.567021	0.918101	0.942417	0.974198	0.329958	0.998858
5S_dup7_seq_1352	394.277	-0.191459	0.196588	-0.973908	0.330102	0.998858
hsa-piR-2287	1.10302	-0.811819	0.833727	-0.973723	0.330194	0.998858
hsa-piR-24978	0.41134	1.07544	1.10507	0.973182	0.330463	0.998858
hsa-miR-30e-3p	62.1506	-0.355368	0.365166	-0.973169	0.330469	0.998858
hsa-piR-20781	0.395191	-1.28008	1.31716	-0.971852	0.331124	0.998858
hsa-piR-14741	0.483677	1.01043	1.03982	0.971734	0.331183	0.998858
hsa-piR-5361	1.06016	0.672794	0.693083	0.970727	0.331684	0.998858
tRNA-Asp-GTC-5-1	89.5626	0.203321	0.20953	0.970365	0.331864	0.998858
hsa-miR-92b-5p	2.25086	0.550956	0.567907	0.970152	0.331971	0.998858
hsa-miR-6786-3p	0.740815	1.02876	1.06044	0.970126	0.331984	0.998858
tRNA-Pro-TGG-3-1	252.325	-0.33319	0.34357	-0.969788	0.332152	0.998858
hsa-piR-17427	0.780503	0.926713	0.955611	0.96976	0.332166	0.998858
hsa-piR-19770	1.60863	0.611236	0.630306	0.969744	0.332174	0.998858
hsa-miR-508-3p	19.394	0.440279	0.454173	0.969407	0.332342	0.998858
hsa-piR-12307	35.1466	-0.31706	0.327118	-0.969252	0.332419	0.998858
5S_dup6_seq_1351	2.60592	-0.50453	0.520687	-0.968969	0.332561	0.998858
5S_dup15_seq_1501	3.48526	-0.512356	0.528831	-0.968847	0.332621	0.998858
hsa-piR-20480	0.962043	-0.841251	0.868481	-0.968646	0.332722	0.998858
hsa-piR-33013	32230.8	-0.290271	0.299853	-0.968043	0.333023	0.998858
tRNA-Gln-TTG-6-1	17.4278	-0.594698	0.615239	-0.966613	0.333738	0.998858
LSU-rRNA_Hsa_dup16_seq_1403	22.6255	0.251477	0.260253	0.966276	0.333906	0.998858
hsa-piR-28828	0.856989	-0.707891	0.732659	-0.966194	0.333947	0.998858
hsa-miR-9901	0.25909	-1.20894	1.25159	-0.965927	0.334081	0.998858
5S_dup80_seq_574	66.088	-0.218928	0.226938	-0.964705	0.334692	0.998858
hsa-piR-32840	4.4102	-0.608772	0.631124	-0.964585	0.334753	0.998858
hsa-miR-3648	0.550527	1.03517	1.07319	0.964571	0.33476	0.998858
hsa-piR-29872	7.43495	0.336974	0.349377	0.9645	0.334795	0.998858
hsa-piR-11541	0.723515	-0.89944	0.932683	-0.964358	0.334867	0.998858
hsa-miR-125b-5p	1001.41	0.211878	0.219722	0.964298	0.334896	0.998858
5S_dup50_seq_271	0.437663	-1.04789	1.08972	-0.96161	0.336245	0.998858
hsa-piR-26789	0.23204	1.33114	1.38533	0.960885	0.33661	0.998858
5S_dup16_seq_899	4.574	0.587256	0.611731	0.959991	0.33706	0.998858
hsa-piR-7140	0.705523	-0.853812	0.889551	-0.959824	0.337144	0.998858
hsa-piR-31130	0.862108	-0.809233	0.843146	-0.959778	0.337167	0.998858
tRNA-Pro-AGG-2-3	47.298	-0.306181	0.319057	-0.959645	0.337234	0.998858
hsa-piR-10002	2.61114	0.441521	0.46052	0.958745	0.337687	0.998858
5S_dup47_seq_1079	7.32297	-0.301274	0.314239	-0.958741	0.337689	0.998858
hsa-piR-24711	0.665851	-1.2103	1.26284	-0.958399	0.337862	0.998858
hsa-piR-7358	0.256772	-1.4976	1.56276	-0.958302	0.33791	0.998858
hsa-piR-13469	0.499276	1.14465	1.19736	0.955983	0.339081	0.998858
hsa-piR-998	0.279044	-1.31277	1.37409	-0.955378	0.339387	0.998858
hsa-piR-14226	0.855234	-1.11823	1.17052	-0.955332	0.33941	0.998858
LSU-rRNA_Hsa_dup8_seq_23	1.1582	-0.730405	0.764713	-0.955136	0.339509	0.998858
hsa-piR-20580	14.3777	-0.357904	0.375332	-0.953566	0.340303	0.998858
tRNA-Lys-TTT-10-1	3.2903	0.465073	0.487854	0.953303	0.340437	0.998858
hsa-piR-20717	1.63552	-0.599467	0.629131	-0.95285	0.340666	0.998858
hsa-piR-11611	0.599352	0.827887	0.868885	0.952815	0.340684	0.998858
5S_dup21_seq_1108	44.0567	-0.256954	0.269736	-0.952612	0.340787	0.998858
hsa-piR-12693	0.247563	1.48385	1.55806	0.952368	0.34091	0.998858
hsa-piR-17900	1.07864	-0.889638	0.934199	-0.9523	0.340945	0.998858
LSU-rRNA_Hsa_dup15_seq_195	141.394	0.314866	0.330714	0.95208	0.341056	0.998858
5S_dup48_seq_1240	2814.41	0.151525	0.1593	0.951195	0.341505	0.998858
hsa-piR-25786	3.9247	-0.467957	0.492199	-0.950749	0.341732	0.998858
tRNA-Phe-GAA-1-1	15.4301	0.353699	0.372483	0.949573	0.342329	0.998858
hsa-miR-888-5p	198.926	0.423365	0.446071	0.949097	0.342572	0.998858
tRNA-Ala-CGC-5-1	0.262393	-1.32378	1.39656	-0.947885	0.343188	0.998858
hsa-piR-8041	0.602571	-0.916818	0.96757	-0.947547	0.34336	0.998858
tRNA-Pro-AGG-2-7	169.93	-0.297569	0.314087	-0.947409	0.34343	0.998858
5S_dup12_seq_843	134.747	0.15226	0.160778	0.947025	0.343626	0.998858
hsa-piR-25723	0.220319	-1.51899	1.60487	-0.946488	0.3439	0.998858
hsa-piR-23197	38.9952	-0.422829	0.446873	-0.946195	0.344049	0.998858
hsa-piR-25567	0.768034	-0.808434	0.854448	-0.946148	0.344073	0.998858
hsa-piR-10473	1.05951	0.839046	0.886917	0.946025	0.344136	0.998858
hsa-piR-17374	0.348064	-1.18733	1.25544	-0.945747	0.344278	0.998858
hsa-piR-8059	1.2469	0.692968	0.73294	0.945463	0.344422	0.998858
5S_dup6_seq_1277	0.849398	-0.787288	0.833163	-0.944938	0.34469	0.998858
hsa-piR-2304	0.870122	0.716303	0.758553	0.944301	0.345016	0.998858
hsa-piR-10185	4.89505	-0.514977	0.545478	-0.944083	0.345127	0.998858
hsa-miR-133a-3p	1.46286	-0.765043	0.810555	-0.943851	0.345246	0.998858
5S_dup3_seq_211	2.95846	-0.409046	0.433381	-0.943848	0.345247	0.998858
LSU-rRNA_Hsa_dup3_seq_241	15.1262	-0.209389	0.221859	-0.94379	0.345277	0.998858
hsa-piR-30826	0.62947	0.998407	1.0581	0.943589	0.34538	0.998858
hsa-piR-31827	3.83954	-0.519458	0.550525	-0.94357	0.34539	0.998858
hsa-miR-10b-3p	11.2825	0.276347	0.292881	0.943547	0.345401	0.998858
hsa-piR-28178	0.5134	0.933478	0.989812	0.943086	0.345637	0.998858
5S_dup19_seq_1365	7.8928	0.451382	0.47867	0.942993	0.345684	0.998858
hsa-miR-19a-3p	17.9397	0.322254	0.341799	0.942818	0.345774	0.998858
hsa-piR-4614	0.219209	-1.50606	1.59741	-0.942809	0.345778	0.998858
hsa-piR-15358	0.414091	1.12831	1.19683	0.942746	0.345811	0.998858
SSU-rRNA_Hsa_dup1_seq_406	7.6312	-0.333436	0.354025	-0.941844	0.346273	0.998858
hsa-miR-26a-5p	1003.61	0.356797	0.378846	0.9418	0.346295	0.998858
hsa-piR-16960	0.488701	-1.00643	1.06894	-0.941524	0.346437	0.998858
LSU-rRNA_Hsa_dup23_seq_354	15.2901	0.3188	0.338623	0.941462	0.346468	0.998858
SSU-rRNA_Hsa_seq_1300	703.449	0.0943163	0.100187	0.941402	0.346499	0.998858
hsa-piR-13285	1.60682	-0.550058	0.58434	-0.941332	0.346535	0.998858
hsa-piR-33083	0.929755	-0.955606	1.0156	-0.940929	0.346741	0.998858
hsa-piR-32026	1.04287	-0.822187	0.874104	-0.940605	0.346907	0.998858
hsa-piR-1727	1.36148	0.597321	0.635223	0.940333	0.347047	0.998858
hsa-piR-9689	1.66821	-0.54309	0.577908	-0.939751	0.347345	0.998858
hsa-piR-27979	0.236432	-1.48171	1.57675	-0.939722	0.34736	0.998858
hsa-piR-28752	0.288713	1.16846	1.24408	0.939219	0.347618	0.998858
5S_dup4_seq_864	0.520503	-0.868253	0.9249	-0.938754	0.347857	0.998858
hsa-piR-11423	2.10608	-0.535999	0.571025	-0.938662	0.347905	0.998858
hsa-piR-25464	0.341587	-1.17482	1.25191	-0.93842	0.348028	0.998858
hsa-piR-26825	3.45545	-0.463563	0.494003	-0.938381	0.348049	0.998858
hsa-piR-18896	1.01789	0.727662	0.775552	0.938251	0.348115	0.998858
hsa-piR-22076	1.46191	-0.729682	0.778028	-0.937862	0.348316	0.998858
hsa-piR-7869	0.588158	-0.867813	0.925371	-0.9378	0.348347	0.998858
hsa-miR-185-3p	1.25207	-0.630565	0.673666	-0.936021	0.349262	0.998858
hsa-piR-9626	1.98267	-0.668483	0.714209	-0.935977	0.349285	0.998858
hsa-piR-28928	3.94383	0.446552	0.477164	0.935847	0.349352	0.998858
hsa-piR-29861	0.698724	-0.829613	0.886657	-0.935664	0.349446	0.998858
SSU-rRNA_Hsa_seq_212	0.765839	-0.768363	0.821402	-0.935429	0.349567	0.998858
hsa-piR-7942	0.626056	0.816159	0.872628	0.935289	0.349639	0.998858
hsa-miR-1323	19.5901	-0.491722	0.525958	-0.934908	0.349836	0.998858
hsa-miR-23b-3p	64.6475	0.306005	0.327447	0.934517	0.350037	0.998858
hsa-piR-24862	34.663	-0.324523	0.347266	-0.934506	0.350043	0.998858
5S_dup19_seq_509	9.48811	-0.274975	0.294262	-0.934457	0.350068	0.998858
hsa-piR-10187	0.708869	-0.900436	0.963965	-0.934096	0.350254	0.998858
hsa-piR-5651	0.944556	0.831037	0.889741	0.934021	0.350293	0.998858
tRNA-Lys-TTT-3-1	597.884	0.227814	0.244011	0.93362	0.3505	0.998858
hsa-piR-10760	0.556956	-1.61081	1.72599	-0.933267	0.350682	0.998858
hsa-piR-29631	0.610635	0.844753	0.905664	0.932745	0.350952	0.998858
hsa-piR-33096	5.16979	-0.452022	0.484764	-0.932457	0.3511	0.998858
hsa-piR-6317	0.428017	-1.14646	1.22973	-0.932281	0.351191	0.998858
5S_dup27_seq_480	3.04489	-0.406639	0.43629	-0.93204	0.351316	0.998858
5S_dup17_seq_601	152.009	0.276391	0.296582	0.931921	0.351377	0.998858
5S_dup84_seq_108	0.552614	0.902298	0.96852	0.931625	0.35153	0.998858
hsa-piR-9137	25.4495	-0.281353	0.302289	-0.930743	0.351987	0.998858
hsa-piR-23279	1.00749	-0.6411	0.689085	-0.930364	0.352183	0.998858
hsa-piR-18758	0.301198	-1.45562	1.56557	-0.92977	0.35249	0.998858
5S_dup16_seq_468	0.504776	-0.860929	0.92634	-0.929388	0.352688	0.998858
LSU-rRNA_Hsa_dup4_seq_394	23.4373	-0.371271	0.399651	-0.928989	0.352895	0.998858
hsa-miR-450b-5p	1.69776	0.609234	0.656282	0.928312	0.353246	0.998858
hsa-piR-31435	2.56152	-0.481868	0.519098	-0.92828	0.353262	0.998858
hsa-piR-23832	0.764948	0.800457	0.863037	0.927489	0.353673	0.998858
LSU-rRNA_Hsa_seq_634	868.675	-0.181226	0.195409	-0.927419	0.353709	0.998858
hsa-piR-20910	0.587716	1.07373	1.1582	0.927068	0.353891	0.998858
hsa-piR-12703	0.515814	-1.22956	1.32679	-0.92672	0.354072	0.998858
hsa-piR-17000	5.44485	-0.654007	0.705724	-0.926717	0.354073	0.998858
hsa-piR-32934	12.5102	0.438004	0.472805	0.926395	0.354241	0.998858
hsa-miR-221-3p	137.779	0.294412	0.317821	0.926343	0.354268	0.998858
hsa-piR-2961	1.31804	-0.629665	0.680132	-0.925799	0.354551	0.998858
hsa-miR-548o-3p	3.24356	-0.430553	0.465256	-0.925412	0.354752	0.998858
hsa-piR-5478	1.34383	0.704663	0.761974	0.924786	0.355077	0.998858
hsa-piR-6094	0.519219	-0.893169	0.966466	-0.92416	0.355403	0.998858
hsa-piR-7051	0.358634	-1.25511	1.3585	-0.923891	0.355543	0.998858
hsa-piR-27252	0.357773	-1.5808	1.71115	-0.923823	0.355579	0.998858
5S_dup47_seq_198	9.38123	0.444547	0.481263	0.923708	0.355638	0.998858
tRNA-Lys-TTT-3-2	2254.09	0.228784	0.247702	0.923627	0.355681	0.998858
hsa-piR-20265	0.570034	-1.07154	1.16059	-0.923277	0.355863	0.998858
hsa-piR-15958	0.679311	0.918259	0.994672	0.923178	0.355915	0.998858
hsa-piR-24052	5.77405	-0.393092	0.426185	-0.922351	0.356346	0.998858
hsa-piR-13284	1.68689	-0.701846	0.762482	-0.920475	0.357324	0.998858
hsa-miR-34a-5p	3.23668	0.448159	0.486974	0.920293	0.35742	0.998858
hsa-piR-8857	5.85012	-0.436771	0.474649	-0.920199	0.357469	0.998858
hsa-piR-23589	0.845115	-0.837847	0.910702	-0.920001	0.357572	0.998858
hsa-piR-21681	0.681416	-0.880483	0.957677	-0.919395	0.357889	0.998858
hsa-piR-27133	2.51555	-0.501025	0.545079	-0.919179	0.358002	0.998858
hsa-miR-549a-3p	0.272395	1.38848	1.51136	0.918692	0.358257	0.998858
tRNA-Asp-GTC-2-1	623.146	-0.267503	0.291243	-0.918488	0.358364	0.998858
hsa-piR-17070	0.46527	-0.885011	0.963929	-0.918129	0.358552	0.998858
hsa-piR-30914	0.636251	0.87965	0.958453	0.917781	0.358733	0.998858
hsa-piR-33032	34.6984	-0.380899	0.415254	-0.917267	0.359003	0.998858
hsa-piR-10554	0.362678	-1.21206	1.32362	-0.915722	0.359813	0.998858
hsa-piR-14577	27.9743	0.548849	0.599448	0.915592	0.359881	0.998858
hsa-piR-23613	0.515548	1.03744	1.13388	0.914953	0.360216	0.998858
hsa-miR-3675-5p	0.263645	-1.28251	1.40297	-0.914141	0.360643	0.998858
hsa-piR-23113	1.2958	-0.633535	0.693379	-0.913691	0.360879	0.998858
hsa-piR-7619	0.882416	-0.904263	0.98971	-0.913664	0.360893	0.998858
hsa-piR-7855	1.25573	0.615519	0.673912	0.913353	0.361057	0.998858
hsa-piR-26897	0.853658	0.745641	0.816401	0.913327	0.361071	0.998858
hsa-piR-25959	0.223091	-1.43504	1.57174	-0.913028	0.361228	0.998858
hsa-miR-193b-5p	3.49185	-0.461364	0.505468	-0.912748	0.361375	0.998858
hsa-piR-7630	0.377503	1.07692	1.17997	0.912663	0.36142	0.998858
hsa-piR-2438	0.32756	-1.13022	1.23846	-0.9126	0.361453	0.998858
5S_dup52_seq_346	3.31384	0.387813	0.425023	0.912451	0.361531	0.998858
hsa-piR-9893	0.552185	0.850151	0.931897	0.91228	0.361621	0.998858
hsa-piR-24797	3.98208	-0.362185	0.397042	-0.912209	0.361658	0.998858
LSU-rRNA_Hsa_dup1_seq_412	1514.09	-0.152435	0.1672	-0.911697	0.361928	0.998858
tRNA-Pro-TGG-3-5	70.3301	-0.344545	0.37805	-0.911373	0.362099	0.998858
hsa-piR-963	1.00262	-0.765655	0.840218	-0.911257	0.36216	0.998858
hsa-miR-153-3p	2.58082	0.598546	0.656955	0.911092	0.362247	0.998858
hsa-piR-3396	8.73347	-0.299034	0.328287	-0.910893	0.362352	0.998858
hsa-piR-19427	0.459088	-0.972073	1.06729	-0.910783	0.36241	0.998858
tRNA-Asn-GTT-9-2	3.02733	-0.465961	0.51167	-0.910666	0.362471	0.998858
5S_dup9_seq_1281	9.42208	-0.253982	0.278929	-0.910562	0.362526	0.998858
hsa-piR-17351	0.520469	-1.08297	1.18939	-0.910526	0.362545	0.998858
hsa-piR-7675	0.779204	-0.944093	1.0372	-0.910234	0.362699	0.998858
LSU-rRNA_Hsa_dup31_seq_128	0.919797	0.81615	0.896984	0.909882	0.362885	0.998858
hsa-piR-16874	0.625413	0.922289	1.01375	0.909778	0.36294	0.998858
hsa-piR-887	1.0713	0.616172	0.677457	0.909537	0.363067	0.998858
hsa-piR-25512	0.669613	0.95393	1.04893	0.909434	0.363121	0.998858
tRNA-Pro-TGG-3-3	70.5843	-0.349826	0.384765	-0.909193	0.363248	0.998858
hsa-piR-4547	0.454852	1.49459	1.64481	0.90867	0.363524	0.998858
hsa-piR-7435	2.57649	-0.524615	0.577765	-0.908008	0.363874	0.998858
hsa-piR-28453	8.01234	-0.27422	0.302077	-0.907783	0.363993	0.998858
hsa-piR-2458	0.6416	0.828552	0.91289	0.907614	0.364082	0.998858
5S_dup118_seq_125	39.1107	-0.234045	0.257876	-0.907586	0.364097	0.998858
hsa-piR-27831	2.86363	-0.437562	0.482139	-0.907542	0.36412	0.998858
5S_dup17_seq_1452	564.913	-0.17244	0.190123	-0.906988	0.364413	0.998858
hsa-piR-27696	0.62619	-0.874607	0.964345	-0.906944	0.364436	0.998858
hsa-miR-197-3p	9.8111	0.249922	0.276066	0.905297	0.365308	0.998858
hsa-miR-33a-5p	1.71456	0.592998	0.65534	0.904871	0.365534	0.998858
hsa-piR-27337	0.973142	-0.750914	0.829915	-0.904808	0.365567	0.998858
hsa-piR-24154	0.476543	0.81843	0.904616	0.904726	0.365611	0.998858
hsa-piR-25046	0.352596	-1.56229	1.7269	-0.904678	0.365636	0.998858
hsa-miR-24-2-5p	2.6757	0.403213	0.445835	0.904399	0.365784	0.998858
hsa-piR-23026	0.815273	-0.831779	0.919754	-0.904349	0.36581	0.998858
hsa-piR-26775	0.305935	-1.04767	1.15854	-0.904299	0.365837	0.998858
hsa-piR-32844	8.28826	-0.452871	0.500831	-0.904239	0.365869	0.998858
hsa-piR-12405	1.51088	-0.563672	0.623371	-0.904233	0.365872	0.998858
LSU-rRNA_Hsa_dup13_seq_317	12.6817	0.268958	0.297554	0.903899	0.366049	0.998858
hsa-piR-30308	0.455771	-1.06904	1.18285	-0.903789	0.366107	0.998858
hsa-piR-13892	3.07684	-0.472044	0.522497	-0.903439	0.366293	0.998858
hsa-piR-25946	0.581632	0.892256	0.98778	0.903294	0.36637	0.998858
hsa-piR-29146	4.11708	-0.459408	0.508605	-0.903269	0.366383	0.998858
5S_dup28_seq_1466	1.6432	0.504327	0.559479	0.901422	0.367364	0.998858
hsa-piR-28675	2.43746	0.485391	0.538558	0.901279	0.36744	0.998858
hsa-piR-29137	0.873722	0.726318	0.80598	0.901161	0.367503	0.998858
hsa-piR-30617	0.619592	0.967816	1.07403	0.901107	0.367532	0.998858
hsa-piR-2125	0.666943	0.860989	0.95678	0.899881	0.368184	0.998858
hsa-piR-28079	0.25572	-1.14253	1.27	-0.899636	0.368314	0.998858
hsa-miR-500b-3p	0.419464	1.22607	1.36337	0.899293	0.368497	0.998858
hsa-piR-15652	0.66273	0.83189	0.925809	0.898555	0.36889	0.998858
hsa-piR-27762	0.812782	0.703446	0.783905	0.897361	0.369526	0.998858
hsa-piR-20619	0.639137	0.907005	1.01095	0.897185	0.36962	0.998858
hsa-piR-32014	0.9306	-0.838009	0.934591	-0.896659	0.369901	0.998858
LSU-rRNA_Hsa_dup17_seq_692	1.78164	0.508327	0.56746	0.895794	0.370363	0.998858
hsa-piR-12234	0.727117	-0.720633	0.804673	-0.89556	0.370488	0.998858
hsa-piR-24734	10.1171	-0.258916	0.289192	-0.895308	0.370622	0.998858
5S_dup5_seq_1489	0.335892	1.08691	1.21402	0.895296	0.370629	0.998858
tRNA-Lys-CTT-4-1	1118.37	-0.214102	0.239159	-0.895232	0.370663	0.998858
5S_dup35_seq_749	2.25815	-0.479561	0.535695	-0.895213	0.370673	0.998858
hsa-piR-670	3.14779	0.395896	0.442345	0.894993	0.370791	0.998858
hsa-piR-2585	0.44553	-1.12705	1.25963	-0.894748	0.370922	0.998858
hsa-piR-7797	0.612078	-0.803773	0.89835	-0.894722	0.370936	0.998858
hsa-piR-20115	0.514855	-1.1332	1.2667	-0.894608	0.370997	0.998858
hsa-miR-6715b-3p	6.63331	0.400404	0.448126	0.893508	0.371585	0.998858
hsa-miR-526a-5p	0.844513	-0.695436	0.778345	-0.89348	0.3716	0.998858
5S_dup56_seq_1145	1.16404	0.634997	0.711008	0.893094	0.371807	0.998858
hsa-miR-561-5p	9.60648	-0.331548	0.371721	-0.891927	0.372432	0.998858
hsa-piR-2051	0.933372	-0.679307	0.761947	-0.891541	0.372639	0.998858
hsa-piR-11721	1.17422	-0.609435	0.684237	-0.890677	0.373102	0.998858
5S_dup26_seq_1113	1.05848	-0.623607	0.700162	-0.890661	0.373111	0.998858
hsa-piR-7764	0.617451	-0.845104	0.949083	-0.890443	0.373228	0.998858
hsa-piR-1215	0.52267	-0.876897	0.985094	-0.890166	0.373377	0.998858
5S_dup45_seq_962	181.471	0.151832	0.170574	0.89012	0.373401	0.998858
hsa-miR-532-3p	6.69341	0.294062	0.330442	0.889903	0.373518	0.998858
LSU-rRNA_Hsa_dup1_seq_7	1623.84	0.141082	0.158542	0.889868	0.373537	0.998858
5S_dup15_seq_845	233.378	-0.176598	0.198511	-0.889614	0.373673	0.998858
hsa-piR-239	0.446442	-1.05448	1.18851	-0.88723	0.374955	0.998858
hsa-piR-11688	4.00953	-0.400147	0.451144	-0.88696	0.3751	0.998858
SSU-rRNA_Hsa_dup1_seq_503	4.27867	-0.365797	0.412578	-0.886613	0.375287	0.998858
hsa-piR-23246	0.971327	0.635146	0.716487	0.886473	0.375363	0.998858
hsa-miR-3064-5p	0.707859	0.830191	0.936845	0.886156	0.375534	0.998858
hsa-piR-13422	5.65061	0.345928	0.390457	0.885957	0.375641	0.998858
hsa-piR-33030	33.133	0.297668	0.336039	0.885815	0.375717	0.998858
hsa-piR-7543	0.538902	-0.878916	0.992265	-0.885768	0.375743	0.998858
hsa-piR-2328	0.401176	-1.51508	1.71059	-0.885705	0.375777	0.998858
hsa-piR-22871	0.618411	-0.814873	0.920071	-0.885663	0.375799	0.998858
hsa-piR-24723	0.441412	-0.996048	1.12485	-0.885495	0.37589	0.998858
hsa-piR-1814	4.15944	-0.56096	0.633545	-0.88543	0.375925	0.998858
5S_dup39_seq_753	10.3985	-0.281691	0.318407	-0.884688	0.376325	0.998858
5S_dup37_seq_186	1.56851	-0.623068	0.704419	-0.884513	0.37642	0.998858
hsa-piR-29928	3.17156	0.503659	0.569831	0.883874	0.376764	0.998858
hsa-piR-9651	0.525534	0.885346	1.00195	0.883618	0.376902	0.998858
hsa-piR-16918	1.3056	-0.564917	0.639723	-0.883065	0.377201	0.998858
hsa-piR-8328	2.76868	0.425994	0.48265	0.882616	0.377444	0.998858
hsa-piR-13643	1.51659	-0.501247	0.568119	-0.882293	0.377619	0.998858
hsa-piR-5293	0.430336	-1.04	1.17898	-0.882115	0.377715	0.998858
hsa-piR-8225	0.307747	0.998621	1.1323	0.881937	0.377811	0.998858
hsa-piR-15080	1.3925	-0.684729	0.776751	-0.881529	0.378032	0.998858
hsa-piR-941	3.10464	-0.412653	0.468294	-0.881184	0.378218	0.998858
hsa-piR-22203	0.377122	0.88529	1.0055	0.880449	0.378616	0.998858
hsa-piR-22439	0.764969	-0.735623	0.835522	-0.880436	0.378623	0.998858
hsa-miR-200a-5p	19.8913	0.278093	0.315997	0.88005	0.378832	0.998858
hsa-miR-520f-3p	1.32176	0.597779	0.679309	0.87998	0.37887	0.998858
hsa-miR-1277-3p	0.331936	-1.14144	1.29722	-0.879916	0.378905	0.998858
hsa-piR-3858	0.53467	0.88372	1.00471	0.879578	0.379088	0.998858
hsa-piR-733	0.443804	-0.958321	1.09054	-0.878759	0.379532	0.998858
hsa-miR-512-3p	15.1424	0.362717	0.413412	0.877373	0.380284	0.998858
hsa-piR-8097	1.27117	0.639504	0.729152	0.87705	0.380459	0.998858
hsa-miR-4492	1.53766	-0.58366	0.665656	-0.876819	0.380585	0.998858
hsa-piR-33186	0.565348	-1.1985	1.36693	-0.876788	0.380602	0.998858
hsa-miR-10a-3p	10.2278	0.357443	0.407679	0.876775	0.380609	0.998858
tRNA-Cys-GCA-18-1	9.99294	-0.388151	0.443107	-0.875974	0.381044	0.998858
tRNA-Val-CAC-9-1	0.9251	-0.931437	1.06332	-0.875973	0.381045	0.998858
hsa-miR-191-5p	1157.27	0.161828	0.184903	0.875203	0.381464	0.998858
5S_dup35_seq_1319	15.6438	0.30588	0.349707	0.874676	0.38175	0.998858
5S_dup55_seq_1248	0.873656	-0.789373	0.902512	-0.874641	0.38177	0.998858
hsa-piR-17149	1.64784	0.657858	0.752336	0.874421	0.381889	0.998858
hsa-miR-219a-5p	0.481248	-0.919421	1.05261	-0.873467	0.382409	0.998858
5S_dup5_seq_1016	2.02796	-0.522468	0.59835	-0.873181	0.382565	0.998858
hsa-piR-3112	0.385253	-0.935162	1.07307	-0.871481	0.383492	0.998858
hsa-piR-9030	0.594751	0.769516	0.883019	0.87146	0.383503	0.998858
hsa-piR-10930	0.802074	0.706169	0.810359	0.871427	0.383521	0.998858
hsa-piR-3035	0.707739	-0.74009	0.850099	-0.870593	0.383977	0.998858
tRX-Val-NNN-1-1	1.62692	0.63455	0.729169	0.870238	0.384171	0.998858
hsa-piR-2846	3.1115	-0.412398	0.473918	-0.870188	0.384197	0.998858
5S_dup28_seq_939	63.1024	0.197977	0.227526	0.870131	0.384229	0.998858
hsa-piR-12484	2.9837	0.415707	0.477783	0.870076	0.384259	0.998858
5S_dup65_seq_557	3.57836	-0.373361	0.4292	-0.869899	0.384355	0.998858
hsa-piR-24211	1.55097	-0.563823	0.648482	-0.86945	0.384601	0.998858
hsa-piR-13860	0.704516	-0.808891	0.930585	-0.869229	0.384722	0.998858
hsa-miR-4315	0.377529	0.990963	1.14057	0.868828	0.384941	0.998858
LSU-rRNA_Hsa_dup12_seq_1311	0.691004	-0.867388	0.998436	-0.868747	0.384986	0.998858
hsa-piR-6564	1.28808	-0.557875	0.642461	-0.86834	0.385208	0.998858
hsa-miR-144-3p	0.228559	-1.34529	1.54962	-0.868141	0.385317	0.998858
hsa-piR-21275	14.3463	-0.244476	0.281992	-0.866963	0.385962	0.998858
hsa-miR-500a-3p	24.8685	0.235103	0.271212	0.866863	0.386017	0.998858
hsa-piR-9759	1.5338	0.693622	0.800486	0.866501	0.386216	0.998858
hsa-miR-216b-5p	1.17349	-0.63889	0.737475	-0.86632	0.386315	0.998858
hsa-piR-26332	4.24594	0.432028	0.498708	0.866295	0.386328	0.998858
hsa-miR-1231	0.354461	-1.23437	1.42542	-0.865967	0.386508	0.998858
hsa-piR-886	0.721727	0.7443	0.859721	0.865746	0.38663	0.998858
hsa-piR-12446	0.356159	-1.11498	1.28801	-0.865658	0.386677	0.998858
5S_dup76_seq_1168	0.434745	0.996241	1.15089	0.865624	0.386697	0.998858
SSU-rRNA_Hsa_dup4_seq_1259	10.725	-0.260263	0.300854	-0.865079	0.386996	0.998858
hsa-piR-17455	0.968678	-0.684799	0.791641	-0.865038	0.387018	0.998858
hsa-piR-1865	0.428347	1.00546	1.16284	0.864657	0.387227	0.998858
5S_dup2_seq_444	20.5533	-0.260487	0.301378	-0.864319	0.387412	0.998858
hsa-piR-9676	1.50335	0.570343	0.66005	0.86409	0.387539	0.998858
hsa-piR-12823	0.340163	-1.09381	1.26641	-0.863706	0.387749	0.998858
hsa-piR-25509	5.84567	0.455885	0.528121	0.86322	0.388016	0.998858
5S_dup9_seq_15	1.46917	-0.651835	0.755177	-0.863156	0.388052	0.998858
hsa-miR-449b-3p	2.39431	-0.468696	0.54339	-0.862541	0.38839	0.998858
hsa-piR-15454	1.16825	0.643025	0.745523	0.862516	0.388404	0.998858
hsa-piR-15778	0.509329	-0.850075	0.985989	-0.862155	0.388602	0.998858
5S_dup75_seq_568	4.13331	0.317653	0.368447	0.86214	0.388611	0.998858
hsa-piR-2624	1.07999	-0.682501	0.793102	-0.860546	0.389488	0.998858
hsa-piR-498	1.19104	0.628719	0.731551	0.859432	0.390102	0.998858
hsa-piR-4285	0.488656	-0.934424	1.08741	-0.859315	0.390167	0.998858
5S_dup3_seq_488	20.6556	0.229363	0.267177	0.858466	0.390635	0.998858
hsa-piR-20227	0.239277	1.1935	1.39048	0.858337	0.390706	0.998858
hsa-piR-14663	4.50191	-0.32505	0.378945	-0.857778	0.391015	0.998858
hsa-piR-16425	0.465052	-0.923414	1.07656	-0.857749	0.391031	0.998858
hsa-piR-26140	0.431779	-1.07152	1.25009	-0.857153	0.39136	0.998858
5S_dup55_seq_977	147.769	0.130061	0.151805	0.856766	0.391574	0.998858
tRNA-Ser-AGA-4-1	178.54	0.203231	0.237266	0.856552	0.391693	0.998858
hsa-miR-27b-3p	369.195	0.291776	0.340667	0.856484	0.39173	0.998858
hsa-piR-25182	0.420263	0.968194	1.13048	0.856444	0.391752	0.998858
5S_dup79_seq_103	35.9648	-0.17638	0.205961	-0.856375	0.39179	0.998858
hsa-piR-2811	1.97405	0.622514	0.727789	0.85535	0.392358	0.998858
hsa-piR-15007	0.755187	-0.704781	0.824153	-0.855158	0.392463	0.998858
5S_dup28_seq_481	568.901	-0.164362	0.192305	-0.854693	0.392721	0.998858
hsa-piR-27561	3.32979	0.428488	0.501466	0.85447	0.392845	0.998858
hsa-piR-19212	3.47981	-0.366313	0.428934	-0.854007	0.393101	0.998858
hsa-piR-26037	0.78594	-0.845439	0.990637	-0.85343	0.393421	0.998858
tRNA-Lys-TTT-3-3	582.911	0.213992	0.250907	0.852874	0.393729	0.998858
hsa-piR-22227	1.20972	0.575932	0.675666	0.852391	0.393997	0.998858
hsa-piR-19534	1.65487	-0.553162	0.649132	-0.852157	0.394127	0.998858
hsa-miR-127-3p	33.4802	-0.237031	0.278252	-0.851856	0.394294	0.998858
5S_dup63_seq_1153	0.754934	-0.722196	0.848256	-0.851389	0.394554	0.998858
hsa-piR-7571	0.61169	0.778615	0.915438	0.850539	0.395025	0.998858
hsa-piR-32859	35.8179	-0.234978	0.276347	-0.850302	0.395157	0.998858
hsa-piR-12492	0.65072	-0.806954	0.949045	-0.85028	0.395169	0.998858
LSU-rRNA_Hsa_dup11_seq_51	160536	0.107701	0.126726	0.84987	0.395398	0.998858
hsa-piR-14296	1.13329	-0.621601	0.731493	-0.849769	0.395453	0.998858
hsa-piR-20818	1.71058	-0.527568	0.620867	-0.849728	0.395476	0.998858
hsa-piR-7394	0.702701	-0.826941	0.973538	-0.849418	0.395649	0.998858
5S_dup11_seq_645	5.35826	-0.371974	0.437988	-0.849278	0.395726	0.998858
hsa-piR-3282	0.25475	1.1682	1.37639	0.848743	0.396024	0.998858
hsa-piR-25982	0.359268	0.883547	1.0416	0.848261	0.396292	0.998858
hsa-piR-23024	1.56077	-0.550008	0.648735	-0.847816	0.39654	0.998858
hsa-piR-29009	0.282119	-1.46515	1.72879	-0.847501	0.396716	0.998858
hsa-miR-96-5p	43.0254	0.259923	0.306991	0.846679	0.397174	0.998858
hsa-miR-30b-3p	2.48809	0.402833	0.475862	0.846533	0.397255	0.998858
hsa-piR-29879	13.9633	0.289627	0.34217	0.846443	0.397306	0.998858
5S_dup4_seq_413	7.04883	-0.234722	0.277581	-0.845598	0.397777	0.998858
5S_dup39_seq_1323	34.5246	0.221519	0.262074	0.845256	0.397968	0.998858
hsa-piR-3834	1.07884	0.790751	0.935721	0.845071	0.398071	0.998858
hsa-piR-25462	0.830018	-0.699269	0.82774	-0.844793	0.398227	0.998858
hsa-piR-3132	1.74136	-0.538701	0.638585	-0.843585	0.398901	0.998858
hsa-piR-9377	0.307452	1.14493	1.35786	0.843191	0.399122	0.998858
SSU-rRNA_Hsa_dup3_seq_1505	209.262	0.133198	0.157987	0.843094	0.399176	0.998858
LSU-rRNA_Hsa_dup1_seq_1280	11.048	-0.196113	0.23267	-0.842881	0.399295	0.998858
hsa-piR-24383	0.772299	-0.655535	0.777954	-0.84264	0.39943	0.998858
hsa-piR-11185	0.387494	1.0878	1.29098	0.842615	0.399444	0.998858
hsa-piR-29956	0.27416	-1.1727	1.39251	-0.842151	0.399703	0.998858
hsa-miR-3613-3p	0.940426	-0.636887	0.756382	-0.842017	0.399778	0.998858
hsa-piR-3854	0.832708	-0.701805	0.83359	-0.841906	0.399841	0.998858
hsa-piR-2176	0.611947	0.818392	0.972681	0.841377	0.400137	0.998858
5S_dup68_seq_1266	1.637	-0.550823	0.654688	-0.841352	0.400151	0.998858
hsa-piR-28466	0.469276	0.970209	1.15367	0.84098	0.400359	0.998858
hsa-piR-25693	1.81186	-0.465963	0.554277	-0.840667	0.400535	0.998858
hsa-piR-5024	1.88252	0.501597	0.596744	0.840557	0.400596	0.998858
hsa-miR-5699-5p	0.540496	0.983946	1.17079	0.840414	0.400676	0.998858
hsa-piR-8912	3.01463	0.361832	0.430672	0.840158	0.40082	0.998858
hsa-piR-1803	0.392331	-1.23324	1.468	-0.840082	0.400863	0.998858
hsa-piR-20263	0.529042	0.893474	1.06437	0.839437	0.401224	0.998858
hsa-piR-15857	1.36311	0.621315	0.740262	0.839318	0.401291	0.998858
hsa-piR-3711	0.686594	-0.795642	0.948089	-0.839206	0.401354	0.998858
hsa-piR-4703	1.66939	0.486093	0.579417	0.838933	0.401507	0.998858
tRNA-SeC-TCA-3-1	2.80628	-0.721597	0.860218	-0.838853	0.401552	0.998858
hsa-piR-8562	2.50243	-0.437364	0.522499	-0.837062	0.402558	0.998858
hsa-miR-1843	6.57581	-0.291183	0.347887	-0.837005	0.40259	0.998858
hsa-piR-31129	0.546069	-0.883482	1.0556	-0.83695	0.402621	0.998858
hsa-piR-33008	14.9373	0.23677	0.283039	0.836527	0.402858	0.998858
hsa-piR-19568	0.814946	-0.7956	0.95111	-0.836496	0.402876	0.998858
hsa-piR-5306	1.48595	-0.541228	0.6472	-0.836261	0.403008	0.998858
5S_dup89_seq_112	1.62359	-0.614921	0.735593	-0.835952	0.403182	0.998858
tRNA-Arg-TCG-6-1	3.0323	-0.431927	0.516783	-0.835799	0.403268	0.998858
hsa-piR-24203	0.43097	-0.793762	0.949749	-0.835759	0.40329	0.998858
hsa-piR-3117	2.65212	-0.431607	0.516819	-0.835121	0.403649	0.998858
hsa-piR-25214	2.08571	-0.428386	0.51302	-0.835028	0.403702	0.998858
5S_dup4_seq_449	124.262	0.15275	0.183075	0.834358	0.404079	0.998858
hsa-miR-125b-2-3p	38.939	0.251419	0.301405	0.834158	0.404192	0.998858
tRNA-Asp-GTC-2-11	729.522	-0.250797	0.300674	-0.834117	0.404215	0.998858
hsa-piR-9026	0.707984	-1.02616	1.23031	-0.834067	0.404243	0.998858
hsa-piR-7078	0.656744	-0.88217	1.05825	-0.833616	0.404497	0.998858
hsa-piR-12284	0.223986	1.1647	1.39778	0.833249	0.404704	0.998858
hsa-piR-6301	0.40439	0.878591	1.05483	0.832919	0.40489	0.998858
hsa-miR-424-5p	0.509172	1.02512	1.23082	0.832875	0.404915	0.998858
hsa-miR-424-3p	2.19656	-0.480231	0.576791	-0.83259	0.405076	0.998858
hsa-piR-27171	0.445963	1.03784	1.24658	0.832553	0.405097	0.998858
hsa-piR-897	1.53155	-0.541222	0.650242	-0.832339	0.405218	0.998858
hsa-piR-23882	2.45597	0.375189	0.4508	0.832274	0.405254	0.998858
hsa-piR-2468	0.886362	0.788389	0.948197	0.831461	0.405713	0.998858
hsa-piR-11386	2.29937	-0.431086	0.518708	-0.831076	0.405931	0.998858
hsa-piR-655	0.36002	1.01359	1.21968	0.831024	0.40596	0.998858
tRNA-Ala-AGC-19-1	6.49332	0.333757	0.402028	0.830184	0.406434	0.998858
hsa-miR-1244	1.89383	0.534876	0.644388	0.830053	0.406509	0.998858
tRNA-Ser-AGA-2-5	176.729	0.196525	0.236774	0.830008	0.406534	0.998858
hsa-piR-16628	0.29545	-1.04798	1.26275	-0.829918	0.406585	0.998858
5S_dup55_seq_275	1.16383	0.576108	0.694493	0.829538	0.4068	0.998858
hsa-piR-12752	1.0647	-0.670335	0.808134	-0.829485	0.40683	0.998858
hsa-miR-148b-5p	7.15132	0.317672	0.383131	0.829148	0.407021	0.998858
hsa-piR-21932	0.408241	-1.33128	1.60563	-0.829137	0.407027	0.998858
hsa-piR-3449	0.318084	-0.956746	1.15518	-0.828219	0.407546	0.998858
hsa-let-7f-2-3p	0.929862	0.684642	0.826719	0.828143	0.40759	0.998858
hsa-piR-24591	0.340991	-1.18842	1.43539	-0.827948	0.4077	0.998858
5S_dup20_seq_473	82.9357	0.168687	0.203789	0.827757	0.407808	0.998858
5S_dup12_seq_500	1.64694	-0.610184	0.73747	-0.827402	0.408009	0.998858
hsa-piR-9218	1.09123	0.653468	0.789952	0.827224	0.40811	0.998858
hsa-piR-12235	0.314119	-0.961907	1.16288	-0.827176	0.408137	0.998858
hsa-miR-7-1-3p	2.07363	-0.561187	0.67844	-0.827172	0.408139	0.998858
hsa-piR-30736	0.717468	-0.724793	0.876397	-0.827015	0.408228	0.998858
hsa-piR-12615	1.75274	-0.585261	0.707822	-0.826848	0.408323	0.998858
hsa-miR-320a-3p	264.85	-0.349655	0.423204	-0.826209	0.408686	0.998858
hsa-piR-30055	0.227186	-1.05367	1.27543	-0.826131	0.40873	0.998858
5S_dup33_seq_1382	16.7852	0.224464	0.27171	0.826118	0.408737	0.998858
hsa-piR-28112	2.56236	-0.475177	0.57567	-0.825433	0.409126	0.998858
5S_dup5_seq_281	7.09441	-0.282672	0.342642	-0.824979	0.409383	0.998858
hsa-piR-31477	1.24231	-0.568887	0.689873	-0.824625	0.409585	0.998858
tRNA-Asp-GTC-2-3	608.565	-0.242376	0.294283	-0.823613	0.410159	0.998858
hsa-piR-8843	0.192093	1.17222	1.42328	0.823606	0.410163	0.998858
hsa-piR-10456	1.22916	-0.59899	0.727466	-0.823393	0.410285	0.998858
hsa-piR-30343	0.89676	0.794516	0.96628	0.822242	0.410939	0.998858
5S_dup36_seq_324	1.4903	0.480037	0.584043	0.821921	0.411122	0.998858
LSU-rRNA_Hsa_dup3_seq_1186	0.612492	-0.817206	0.994567	-0.82167	0.411265	0.998858
5S_dup30_seq_744	23.8231	0.239796	0.29186	0.821614	0.411297	0.998858
hsa-piR-20560	0.382144	0.928641	1.13092	0.821135	0.411569	0.998858
hsa-piR-8020	0.315538	-1.11189	1.35416	-0.821093	0.411593	0.998858
hsa-piR-14651	1.21317	0.587411	0.715501	0.820978	0.411659	0.998858
hsa-piR-27878	0.803867	0.774473	0.943911	0.820494	0.411934	0.998858
tRX-Met-NNN-1-1	1.14335	-0.653492	0.796725	-0.820223	0.412089	0.998858
hsa-piR-16625	1.14585	0.543936	0.663164	0.820213	0.412095	0.998858
hsa-miR-4423-5p	0.432088	-1.10081	1.34249	-0.819976	0.41223	0.998858
hsa-piR-19997	0.183312	-1.34587	1.64136	-0.81997	0.412233	0.998858
hsa-piR-8632	0.290315	-0.960141	1.17113	-0.819839	0.412308	0.998858
hsa-miR-365b-5p	0.34072	-1.02447	1.24963	-0.819816	0.412321	0.998858
hsa-piR-32972	66.8126	-0.245779	0.299861	-0.819644	0.412419	0.998858
5S_dup60_seq_1255	3.75407	0.342819	0.418412	0.819333	0.412596	0.998858
hsa-piR-25424	0.358178	0.825092	1.00712	0.819258	0.412639	0.998858
hsa-piR-1679	5.59394	-0.455372	0.556012	-0.818997	0.412788	0.998858
hsa-piR-12263	23.4184	-0.26025	0.317869	-0.818735	0.412938	0.998858
hsa-piR-24084	1.68065	-0.467347	0.57094	-0.818557	0.413039	0.998858
tRNA-Asn-ATT-1-1	0.835528	0.657573	0.803802	0.818078	0.413313	0.998858
hsa-miR-5100	0.502834	0.856092	1.04677	0.817843	0.413447	0.998858
5S_dup92_seq_818	4.37661	0.282903	0.346184	0.817202	0.413813	0.998858
hsa-piR-12837	1.33774	-0.776569	0.950586	-0.816936	0.413965	0.998858
5S_dup12_seq_1447	2.26511	0.456664	0.559062	0.81684	0.41402	0.998858
hsa-piR-8878	1.32739	-0.665555	0.815734	-0.815897	0.414559	0.998858
LSU-rRNA_Hsa_dup28_seq_824	9.46712	0.264195	0.324044	0.815308	0.414896	0.998858
hsa-piR-12425	0.348332	-1.14392	1.40321	-0.815219	0.414947	0.998858
hsa-piR-26080	0.331412	0.874951	1.07358	0.814987	0.41508	0.998858
hsa-piR-29995	2.65943	-0.415837	0.510696	-0.814254	0.415499	0.998858
hsa-piR-30776	0.202267	1.15641	1.42039	0.814146	0.415561	0.998858
hsa-miR-7111-3p	0.300546	-1.27175	1.56353	-0.813382	0.415999	0.998858
hsa-piR-613	8.56849	-0.251792	0.309695	-0.813031	0.4162	0.998858
hsa-piR-17563	5.51869	0.331213	0.407418	0.812958	0.416242	0.998858
LSU-rRNA_Hsa_dup13_seq_270	1642.1	-0.181376	0.223224	-0.812531	0.416487	0.998858
hsa-piR-3477	2.28023	0.447858	0.551203	0.81251	0.416499	0.998858
hsa-piR-14017	0.346767	-1.15786	1.42504	-0.812509	0.4165	0.998858
hsa-piR-13301	2.40241	-0.405721	0.49943	-0.812368	0.416581	0.998858
hsa-piR-16936	0.504613	-0.733442	0.903631	-0.811661	0.416986	0.998858
hsa-piR-6674	4.39609	0.350216	0.431488	0.811647	0.416994	0.998858
tRNA-His-GTG-1-5	1358.31	-0.287087	0.353776	-0.811493	0.417083	0.998858
hsa-miR-548f-3p	0.566083	0.838034	1.03289	0.811352	0.417164	0.998858
hsa-piR-10591	0.538513	0.796311	0.981502	0.811319	0.417183	0.998858
hsa-miR-22-5p	13.1166	-0.250432	0.308747	-0.811125	0.417294	0.998858
hsa-piR-323	0.329236	-1.44966	1.78797	-0.810789	0.417487	0.998858
hsa-piR-22394	0.69339	0.709214	0.874827	0.81069	0.417543	0.998858
5S_dup6_seq_215	0.712119	0.670079	0.826763	0.810485	0.417662	0.998858
hsa-piR-16010	0.919891	-0.618513	0.763164	-0.810459	0.417676	0.998858
hsa-miR-760	0.362641	-0.935013	1.15592	-0.808887	0.41858	0.998858
hsa-piR-1368	3.0763	0.409184	0.5059	0.808824	0.418616	0.998858
5S_dup30_seq_242	1.13514	-0.626316	0.774502	-0.80867	0.418705	0.998858
hsa-piR-21264	0.398456	0.998418	1.23471	0.808626	0.418731	0.998858
hsa-piR-17858	1.87685	0.458887	0.567658	0.808387	0.418868	0.998858
tRNA-Pro-AGG-2-1	169.234	-0.23905	0.295736	-0.808323	0.418904	0.998858
hsa-piR-29542	1.24059	0.712934	0.882385	0.807963	0.419112	0.998858
hsa-miR-1307-5p	18.2507	-0.239643	0.29692	-0.807098	0.41961	0.998858
hsa-piR-14318	0.41748	-1.09857	1.36118	-0.807072	0.419625	0.998858
hsa-piR-9249	0.406271	-1.40483	1.74188	-0.806501	0.419954	0.998858
hsa-piR-9178	0.260128	-1.23982	1.5373	-0.806488	0.419962	0.998858
hsa-piR-8724	0.451572	-0.855864	1.06208	-0.805835	0.420338	0.998858
5S_dup9_seq_425	1.71227	-0.469424	0.582601	-0.805738	0.420394	0.998858
hsa-piR-31686	1.25327	-0.561808	0.697538	-0.805416	0.420579	0.998858
hsa-miR-485-5p	0.422245	1.0313	1.28082	0.805192	0.420709	0.998858
hsa-piR-6756	1.02877	0.688384	0.855822	0.804354	0.421192	0.998858
hsa-piR-7333	2.18469	0.419457	0.521655	0.804089	0.421346	0.998858
hsa-piR-19797	0.913882	-0.655567	0.815718	-0.803669	0.421588	0.998858
tRNA-Asp-GTC-2-9	610.448	-0.233767	0.291208	-0.802748	0.42212	0.998858
hsa-piR-1850	0.565084	0.892098	1.11136	0.80271	0.422142	0.998858
hsa-piR-22440	0.301623	-1.01819	1.26908	-0.802306	0.422376	0.998858
hsa-piR-25463	6.33177	-0.313432	0.390798	-0.802032	0.422535	0.998858
hsa-piR-11553	2.25573	0.373575	0.465805	0.801999	0.422554	0.998858
hsa-piR-30777	1.52096	-0.488246	0.60926	-0.801375	0.422915	0.998858
hsa-piR-536	0.415692	0.753183	0.940233	0.801059	0.423097	0.998858
hsa-piR-2600	4.91209	0.328231	0.409831	0.800895	0.423193	0.998858
hsa-piR-5362	2.12602	0.492967	0.61558	0.800818	0.423237	0.998858
5S_dup64_seq_87	1.18199	-0.521244	0.651128	-0.800525	0.423407	0.998858
tRNA-Ser-CGA-3-1	5.57028	-0.41351	0.516968	-0.799876	0.423783	0.998858
hsa-piR-31076	6.93691	-0.254821	0.318903	-0.799054	0.424259	0.998858
hsa-piR-7738	1.2594	0.719132	0.900141	0.79891	0.424343	0.998858
tRNA-Val-AAC-6-1	179.274	0.175523	0.219953	0.798001	0.42487	0.998858
5S_dup62_seq_1261	110.561	-0.182375	0.22876	-0.797236	0.425314	0.998858
LSU-rRNA_Hsa_dup26_seq_97	254.801	0.129983	0.163072	0.79709	0.425399	0.998858
5S_dup2_seq_139	1.15351	-0.526907	0.661062	-0.797062	0.425415	0.998858
hsa-piR-30913	0.912668	0.693554	0.870288	0.796924	0.425495	0.998858
5S_dup23_seq_1460	1.91886	-0.446119	0.560497	-0.795936	0.426069	0.998858
hsa-piR-7478	3.33913	0.361945	0.454757	0.795907	0.426086	0.998858
hsa-piR-31773	1.32233	0.516259	0.648955	0.795523	0.426309	0.998858
hsa-piR-1598	0.282909	1.00065	1.25829	0.795244	0.426471	0.998858
5S_dup49_seq_201	0.505907	0.813744	1.02349	0.795064	0.426576	0.998858
hsa-piR-7646	1.35928	0.591523	0.744015	0.795042	0.426589	0.998858
hsa-piR-22877	0.536341	-1.11049	1.39794	-0.794379	0.426975	0.998858
5S_dup51_seq_969	64.6725	0.17327	0.218125	0.794362	0.426985	0.998858
hsa-piR-22471	1.23615	-0.56431	0.710412	-0.794343	0.426996	0.998858
hsa-piR-23065	1.81169	-0.437669	0.551268	-0.793932	0.427235	0.998858
5S_dup6_seq_491	0.937777	0.789079	0.994022	0.793825	0.427298	0.998858
5S_dup14_seq_921	1.20134	-0.597316	0.752549	-0.793724	0.427356	0.998858
hsa-miR-19b-3p	182.851	0.243506	0.306976	0.793242	0.427637	0.998858
hsa-piR-27202	0.719685	-0.870761	1.09812	-0.792956	0.427803	0.998858
tRNA-Asp-GTC-2-2	613.028	-0.231158	0.291565	-0.792816	0.427885	0.998858
hsa-piR-22005	0.782308	-0.881381	1.11226	-0.792426	0.428112	0.998858
hsa-piR-30152	0.333137	0.841907	1.06338	0.791729	0.428519	0.998858
hsa-piR-4035	1.7864	0.453725	0.573192	0.791577	0.428608	0.998858
5S_dup1_seq_1346	2.45633	0.452216	0.571414	0.791397	0.428712	0.998858
5S_dup2_seq_579	78.9509	0.140817	0.178082	0.790745	0.429093	0.998858
hsa-piR-24710	0.305908	-1.00258	1.26836	-0.790453	0.429263	0.998858
hsa-piR-32951	31.431	-0.20042	0.25356	-0.790424	0.42928	0.998858
hsa-piR-1687	0.714586	-0.651213	0.823986	-0.790321	0.429341	0.998858
hsa-piR-22376	1.16597	-0.536998	0.679574	-0.790198	0.429412	0.998858
hsa-piR-21679	0.339829	1.07837	1.36517	0.78992	0.429574	0.998858
hsa-miR-885-5p	0.811599	0.692858	0.8773	0.789762	0.429667	0.998858
hsa-piR-5032	1.25339	-0.568609	0.720285	-0.789422	0.429866	0.998858
tRNA-Asp-GTC-2-10	619.289	-0.223755	0.283448	-0.789404	0.429876	0.998858
hsa-piR-775	22.7004	-0.321615	0.407643	-0.788961	0.430135	0.998858
hsa-piR-32936	15.6152	-0.263636	0.334192	-0.788875	0.430185	0.998858
hsa-miR-582-3p	9.50819	0.271093	0.343784	0.788555	0.430372	0.998858
hsa-piR-13168	1.25661	-0.563584	0.715111	-0.788107	0.430634	0.998858
hsa-piR-10741	4.38006	0.327182	0.415159	0.788089	0.430645	0.998858
hsa-piR-26142	1.29366	-0.593242	0.753216	-0.787612	0.430923	0.998858
hsa-piR-13839	1.25173	-0.53821	0.683839	-0.787042	0.431257	0.998858
hsa-miR-30c-1-3p	0.885647	0.602286	0.765337	0.786956	0.431308	0.998858
hsa-piR-13688	0.437223	-0.818758	1.04108	-0.786453	0.431602	0.998858
hsa-piR-22188	0.320273	1.06398	1.353	0.786387	0.431641	0.998858
5S_dup25_seq_662	0.237651	-1.10177	1.40157	-0.786096	0.431812	0.998858
tRNA-Asp-GTC-10-1	47.219	-0.308199	0.39235	-0.785521	0.432148	0.998858
LSU-rRNA_Hsa_dup1_seq_1494	1.09193	-0.545049	0.694106	-0.785254	0.432305	0.998858
tRNA-Gln-TTG-3-2	123.76	-0.163646	0.208536	-0.784739	0.432607	0.998858
hsa-piR-8996	2.71922	-0.441757	0.563024	-0.784614	0.43268	0.998858
hsa-miR-320a-5p	23.0482	-0.223864	0.285409	-0.784361	0.432828	0.998858
hsa-piR-29475	0.250367	-1.0871	1.387	-0.783775	0.433172	0.998858
hsa-piR-8032	6.78256	-0.244237	0.311673	-0.783633	0.433256	0.998858
hsa-miR-532-5p	163.587	0.193719	0.247239	0.78353	0.433316	0.998858
hsa-piR-32830	14.7368	0.268697	0.343075	0.783202	0.433508	0.998858
hsa-piR-33019	25.029	-0.231899	0.296095	-0.783189	0.433516	0.998858
hsa-piR-119	1.01263	-0.567497	0.725034	-0.782718	0.433793	0.998858
hsa-let-7i-5p	208.722	0.231855	0.296241	0.782658	0.433828	0.998858
hsa-piR-12952	0.464221	-0.950206	1.21429	-0.782521	0.433909	0.998858
tRNA-Lys-TTT-3-5	573.973	0.20006	0.255669	0.782493	0.433925	0.998858
hsa-piR-16401	1.69188	-0.572504	0.731753	-0.782373	0.433995	0.998858
5S_dup33_seq_944	5.14951	-0.361104	0.461644	-0.782212	0.43409	0.998858
hsa-piR-21424	0.409595	-0.942731	1.20525	-0.782187	0.434104	0.998858
hsa-piR-6477	0.732665	-0.774924	0.990744	-0.782163	0.434119	0.998858
hsa-piR-6389	0.638959	0.797558	1.0201	0.781846	0.434305	0.998858
hsa-piR-13512	2.56949	-0.451261	0.577236	-0.781762	0.434355	0.998858
5S_dup32_seq_46	5.88466	-0.284627	0.364121	-0.781684	0.4344	0.998858
hsa-piR-17394	0.256047	-1.19006	1.52257	-0.781613	0.434442	0.998858
hsa-piR-27832	1.15255	0.549026	0.703019	0.780954	0.43483	0.998858
hsa-piR-15247	2.71835	-0.355493	0.455884	-0.779787	0.435516	0.998858
hsa-piR-32939	7.23009	0.566319	0.726703	0.779299	0.435804	0.998858
hsa-piR-27754	3.89393	0.599241	0.769983	0.778252	0.43642	0.998858
hsa-piR-19239	5.48618	-0.289263	0.371823	-0.77796	0.436593	0.998858
tRNA-Ile-AAT-8-1	10.103	0.299461	0.384986	0.777848	0.436659	0.998858
hsa-piR-23084	0.170207	-1.28599	1.65345	-0.77776	0.436711	0.998858
hsa-miR-181c-5p	6.94091	0.235167	0.302575	0.777218	0.43703	0.998858
hsa-piR-13119	1.82781	0.42657	0.548885	0.777158	0.437066	0.998858
LSU-rRNA_Hsa_dup9_seq_1377	1568.45	0.081058	0.104369	0.77665	0.437365	0.998858
hsa-piR-5268	0.387104	1.09146	1.40596	0.776308	0.437567	0.998858
hsa-piR-1930	0.495948	0.861877	1.11038	0.776203	0.437629	0.998858
LSU-rRNA_Hsa_seq_1	8.23656	-0.394959	0.508845	-0.776187	0.437639	0.998858
SSU-rRNA_Hsa_seq_1424	1.29521	-0.520268	0.670722	-0.775683	0.437936	0.998858
hsa-piR-4634	1.79988	-0.469108	0.604944	-0.775457	0.43807	0.998858
hsa-piR-30786	0.516615	-0.782529	1.00922	-0.775378	0.438117	0.998858
hsa-piR-12679	0.254344	1.20207	1.5504	0.775326	0.438147	0.998858
hsa-piR-4850	1.58092	-0.447766	0.57821	-0.774401	0.438694	0.998858
LSU-rRNA_Hsa_dup15_seq_322	3.42178	-0.376598	0.486327	-0.774373	0.43871	0.998858
hsa-miR-29b-3p	43.595	0.293842	0.379469	0.774352	0.438723	0.998858
5S_dup35_seq_624	23.1398	-0.196191	0.253404	-0.774223	0.438799	0.998858
hsa-miR-676-3p	0.343862	0.822994	1.06362	0.773767	0.439069	0.998858
hsa-piR-14759	1.199	0.579951	0.750209	0.773054	0.439491	0.998858
hsa-piR-10963	0.449574	-0.848178	1.09796	-0.772507	0.439814	0.998858
hsa-piR-16749	0.914866	-0.640719	0.829684	-0.772245	0.439969	0.998858
hsa-piR-27548	0.665453	-0.77681	1.00593	-0.772231	0.439978	0.998858
hsa-piR-27317	0.285818	0.961634	1.2453	0.77221	0.43999	0.998858
hsa-piR-4139	0.285449	1.0584	1.37104	0.77197	0.440132	0.998858
hsa-piR-2130	0.229808	1.22104	1.5819	0.771883	0.440184	0.998858
hsa-piR-26392	0.332626	-1.14185	1.48048	-0.771272	0.440546	0.998858
5S_dup55_seq_1550	22.7862	0.199695	0.25895	0.771173	0.440604	0.998858
hsa-miR-524-3p	0.682077	-0.753102	0.976649	-0.771109	0.440642	0.998858
hsa-piR-9513	1.57179	-0.478534	0.62075	-0.770896	0.440769	0.998858
hsa-piR-6746	1.03214	-0.54881	0.71203	-0.770768	0.440845	0.998858
hsa-miR-199a-3p	12.6614	-0.308951	0.400845	-0.770749	0.440856	0.998858
hsa-piR-14728	0.866935	-0.567719	0.736923	-0.770391	0.441068	0.998858
hsa-piR-23407	0.228475	1.21783	1.58127	0.770158	0.441206	0.998858
hsa-piR-13644	0.745992	-0.627719	0.816316	-0.768966	0.441914	0.998858
hsa-piR-18607	3.42472	-0.422382	0.549344	-0.768884	0.441962	0.998858
tRNA-Cys-GCA-9-2	39.0353	-0.218327	0.284025	-0.768691	0.442077	0.998858
hsa-piR-1655	0.417813	0.780081	1.01486	0.768659	0.442096	0.998858
hsa-piR-21904	1.30723	0.573894	0.746635	0.768641	0.442106	0.998858
hsa-piR-2739	1.19269	0.588576	0.766051	0.768325	0.442294	0.998858
tRNA-Val-CAC-8-1	1.99156	-0.451791	0.588843	-0.767252	0.442931	0.998858
hsa-piR-3274	1.64448	-0.477104	0.621857	-0.767225	0.442948	0.998858
5S_dup40_seq_1531	62.3319	0.164723	0.214776	0.766952	0.44311	0.998858
hsa-piR-18581	1.24387	0.489573	0.638539	0.766709	0.443255	0.998858
hsa-piR-5724	0.521723	-0.770103	1.00479	-0.766431	0.44342	0.998858
5S_dup28_seq_170	0.483923	-0.808495	1.05512	-0.766259	0.443522	0.998858
tRX-Ala-NNN-5-1	3.15896	-0.422558	0.551572	-0.766097	0.443618	0.998858
hsa-piR-10953	0.420745	-0.888053	1.16006	-0.765523	0.44396	0.998858
LSU-rRNA_Hsa_dup5_seq_555	2.68694	-0.384086	0.501841	-0.765354	0.444061	0.998858
hsa-piR-29776	0.662832	-0.834561	1.09045	-0.76534	0.444069	0.998858
hsa-piR-5176	0.22254	1.21832	1.593	0.764795	0.444394	0.998858
hsa-piR-6732	2.64696	-0.448407	0.586698	-0.764289	0.444695	0.998858
hsa-piR-10091	7.07568	0.307858	0.402868	0.764166	0.444768	0.998858
LSU-rRNA_Hsa_dup14_seq_1314	11.8553	0.252041	0.330013	0.763729	0.445029	0.998858
hsa-piR-14047	1.08842	-0.582461	0.763584	-0.762799	0.445583	0.998858
hsa-piR-18867	2.19034	-0.510475	0.66958	-0.76238	0.445833	0.998858
tRNA-Leu-TAA-3-1	11.9568	-0.231735	0.304218	-0.761739	0.446215	0.998858
hsa-piR-1966	0.450938	0.915351	1.20166	0.761737	0.446217	0.998858
hsa-piR-17101	0.993127	-0.540006	0.709011	-0.761634	0.446279	0.998858
hsa-piR-26764	0.724936	-0.638133	0.838197	-0.761316	0.446468	0.998858
hsa-piR-24897	0.313212	-1.07581	1.41348	-0.76111	0.446592	0.998858
hsa-piR-23657	0.227499	-1.07418	1.41135	-0.7611	0.446598	0.998858
hsa-piR-923	0.243773	1.18668	1.55922	0.761071	0.446615	0.998858
hsa-piR-7003	0.221909	-1.09044	1.43302	-0.760942	0.446692	0.998858
hsa-piR-4676	0.189869	-1.22454	1.60938	-0.760879	0.446729	0.998858
hsa-piR-33090	1.8245	-0.458563	0.602987	-0.760486	0.446964	0.998858
hsa-piR-29454	0.405087	-0.818728	1.07687	-0.760285	0.447084	0.998858
hsa-miR-183-3p	0.588472	-0.795089	1.04585	-0.760232	0.447116	0.998858
hsa-piR-3050	9.27785	-0.446294	0.587086	-0.760187	0.447143	0.998858
hsa-piR-6854	0.724486	0.775852	1.02119	0.759751	0.447403	0.998858
hsa-piR-12277	1.10973	0.546876	0.719956	0.759597	0.447496	0.998858
hsa-piR-6610	3.43702	-0.335965	0.442692	-0.758913	0.447904	0.998858
hsa-piR-9274	0.99833	-0.57732	0.76077	-0.758863	0.447935	0.998858
5S_dup12_seq_291	0.416427	1.03011	1.35751	0.758825	0.447957	0.998858
hsa-piR-13551	0.622543	-0.780158	1.02826	-0.758717	0.448022	0.998858
hsa-piR-33024	1.92167	-0.42686	0.563061	-0.758105	0.448388	0.998858
hsa-piR-28117	0.441879	-0.821161	1.0839	-0.757599	0.448691	0.998858
LSU-rRNA_Hsa_dup6_seq_422	1.10507	-0.522766	0.690564	-0.757013	0.449042	0.998858
hsa-piR-29862	0.931533	0.602731	0.796322	0.756895	0.449113	0.998858
hsa-piR-2538	1.53179	0.568955	0.752088	0.756501	0.449349	0.998858
hsa-piR-32091	0.220322	-1.07343	1.41926	-0.756327	0.449453	0.998858
hsa-miR-361-3p	83.2904	0.162645	0.215073	0.756231	0.449511	0.998858
tRNA-Glu-CTC-1-4	15442.3	-0.23092	0.30539	-0.756149	0.44956	0.998858
hsa-piR-8710	0.294763	-0.978934	1.29513	-0.75586	0.449733	0.998858
5S_dup48_seq_1398	0.981715	-0.550426	0.72829	-0.755778	0.449782	0.998858
hsa-miR-124-3p	2.7362	-0.481403	0.637065	-0.755657	0.449855	0.998858
tRNA-Glu-CTC-1-2	15388.8	-0.229669	0.304022	-0.755436	0.449987	0.998858
hsa-piR-7066	1.77946	0.518936	0.68704	0.755322	0.450056	0.998858
LSU-rRNA_Hsa_dup5_seq_1510	1148.15	0.215027	0.284869	0.754829	0.450351	0.998858
hsa-piR-19038	0.243143	-1.04025	1.37816	-0.754811	0.450363	0.998858
hsa-piR-9898	0.324609	-1.11915	1.4828	-0.754753	0.450397	0.998858
tRNA-Glu-CTC-1-5	15419.4	-0.230147	0.304946	-0.754715	0.45042	0.998858
hsa-piR-7250	4.92935	-0.304598	0.403652	-0.754606	0.450485	0.998858
hsa-piR-3662	0.507673	0.772355	1.02453	0.753861	0.450933	0.998858
hsa-piR-3211	0.222738	1.18632	1.57382	0.753784	0.450979	0.998858
hsa-miR-30c-2-3p	7.56074	0.257686	0.34193	0.753623	0.451076	0.998858
5S_dup28_seq_41	67.0858	0.172058	0.228858	0.751808	0.452166	0.998858
5S_dup3_seq_886	7.39039	0.245109	0.326046	0.751761	0.452195	0.998858
hsa-piR-23581	1.33381	-0.549243	0.730847	-0.751516	0.452342	0.998858
hsa-piR-9142	1.0344	0.60032	0.798962	0.751374	0.452427	0.998858
hsa-piR-21831	1.06284	0.636829	0.848374	0.750646	0.452866	0.998858
hsa-piR-14647	17.6084	0.543139	0.723816	0.750382	0.453025	0.998858
hsa-miR-761	0.404278	-0.86958	1.15894	-0.750324	0.45306	0.998858
hsa-piR-21768	0.89533	-0.783284	1.04398	-0.750287	0.453082	0.998858
hsa-piR-33028	0.51898	-1.03212	1.37647	-0.749836	0.453354	0.998858
tRNA-Gly-GCC-4-1	29.1935	-0.181646	0.242277	-0.749745	0.453408	0.998858
hsa-piR-281	2.44069	-0.395449	0.527453	-0.749732	0.453416	0.998858
hsa-piR-20659	0.568932	-0.868122	1.15802	-0.74966	0.453459	0.998858
hsa-piR-16712	0.594048	-0.671413	0.895693	-0.749603	0.453494	0.998858
hsa-piR-24356	2.97781	-0.345751	0.461306	-0.749504	0.453554	0.998858
hsa-miR-664a-5p	10.065	0.241037	0.321817	0.748988	0.453864	0.998858
hsa-miR-30a-5p	1417.56	0.18408	0.245793	0.748924	0.453903	0.998858
hsa-piR-11091	0.609505	-0.873503	1.16747	-0.748203	0.454338	0.998858
hsa-piR-26004	0.416063	0.720592	0.964259	0.747301	0.454882	0.998858
hsa-piR-33189	5.04884	-0.410891	0.550306	-0.746659	0.455269	0.998858
tRNA-Ala-AGC-14-1	0.709104	-0.700177	0.938604	-0.745977	0.455681	0.998858
hsa-piR-7244	3.32215	-0.378155	0.507306	-0.745418	0.456019	0.998858
tRNA-Asp-GTC-2-4	603.78	-0.226979	0.30475	-0.744802	0.456391	0.998858
hsa-piR-29171	2.03042	0.415585	0.558291	0.744388	0.456642	0.998858
LSU-rRNA_Hsa_dup5_seq_165	7.40269	0.289774	0.389431	0.744097	0.456818	0.998858
hsa-piR-30559	0.387995	-0.840454	1.1305	-0.743435	0.457218	0.998858
hsa-piR-30556	0.257546	0.934495	1.25711	0.743365	0.457261	0.998858
hsa-miR-363-3p	738.406	0.207369	0.278974	0.743328	0.457283	0.998858
hsa-piR-7348	0.426966	-0.859069	1.1565	-0.742815	0.457593	0.998858
tRNA-Sup-TTA-1-1	1.70016	0.41516	0.559032	0.74264	0.457699	0.998858
hsa-piR-26991	1.51364	0.49299	0.663843	0.74263	0.457706	0.998858
hsa-piR-10966	3.07567	0.333494	0.44915	0.742499	0.457785	0.998858
hsa-piR-13288	0.205513	-1.16447	1.56879	-0.742268	0.457925	0.998858
hsa-piR-11282	0.173786	1.07674	1.45097	0.742081	0.458038	0.998858
hsa-piR-639	1.61493	0.424677	0.572472	0.74183	0.45819	0.998858
tRNA-Asp-GTC-2-5	602.958	-0.217806	0.293792	-0.741363	0.458473	0.998858
hsa-piR-10490	6.01401	0.234441	0.316343	0.741098	0.458634	0.998858
5S_dup8_seq_458	4.92399	0.261259	0.352595	0.740961	0.458717	0.998858
hsa-miR-377-5p	0.172641	-1.21482	1.63961	-0.740917	0.458744	0.998858
tRNA-Glu-CTC-1-3	15398.2	-0.225863	0.304874	-0.74084	0.45879	0.998858
hsa-piR-1565	2.14061	-0.408523	0.551451	-0.740815	0.458806	0.998858
hsa-piR-29691	0.436175	0.744031	1.00454	0.740669	0.458894	0.998858
hsa-piR-13156	3.2204	0.309604	0.418367	0.740029	0.459282	0.998858
hsa-piR-19599	1.47653	-0.583907	0.789872	-0.739242	0.45976	0.998858
tRNA-Pro-TGG-3-2	68.8813	-0.254889	0.3452	-0.738379	0.460284	0.998858
hsa-piR-13963	0.443653	-0.691798	0.937994	-0.737528	0.460801	0.998858
hsa-miR-323b-3p	0.442681	-0.851725	1.15508	-0.737371	0.460897	0.998858
hsa-piR-25382	0.811085	0.686772	0.93146	0.737308	0.460935	0.998858
5S_dup21_seq_385	0.223344	-1.13373	1.53893	-0.736701	0.461304	0.998858
hsa-piR-4465	0.171615	1.38875	1.88632	0.736226	0.461593	0.998858
tRNA-Trp-CCA-3-3	6.28558	0.29493	0.400729	0.735984	0.461741	0.998858
hsa-piR-11896	0.7749	0.659498	0.897414	0.734887	0.462408	0.998858
hsa-piR-10621	0.914594	-0.590973	0.804537	-0.73455	0.462613	0.998858
hsa-miR-335-3p	28.8921	-0.330888	0.450494	-0.734499	0.462645	0.998858
hsa-piR-1346	0.226153	1.15728	1.57576	0.734428	0.462688	0.998858
hsa-piR-17713	3.75387	0.553382	0.753651	0.734268	0.462785	0.998858
hsa-piR-15349	8.14686	-0.283899	0.386685	-0.734188	0.462834	0.998858
hsa-piR-21921	0.285974	0.906805	1.23524	0.734115	0.462879	0.998858
hsa-miR-138-5p	0.433234	-0.850092	1.15817	-0.733998	0.46295	0.998858
hsa-piR-5908	1.78958	0.412126	0.561496	0.733979	0.462962	0.998858
hsa-piR-30600	0.653571	-0.893984	1.21952	-0.733063	0.46352	0.998858
5S_dup8_seq_914	28.7652	0.222438	0.303475	0.732972	0.463575	0.998858
hsa-piR-26444	1.46018	-0.495276	0.676654	-0.731948	0.4642	0.998858
hsa-piR-20046	0.275921	-1.01773	1.39054	-0.731892	0.464235	0.998858
hsa-miR-592	17.0364	0.363886	0.497231	0.731826	0.464275	0.998858
hsa-piR-27446	1.83641	-0.466431	0.638048	-0.731028	0.464762	0.998858
hsa-piR-30163	0.91969	0.551371	0.755002	0.73029	0.465213	0.998858
hsa-piR-15882	3.51925	0.328299	0.449598	0.730206	0.465265	0.998858
LSU-rRNA_Hsa_dup9_seq_683	0.973466	0.601163	0.823324	0.730167	0.465288	0.998858
5S_dup42_seq_1132	4.09253	-0.306324	0.420116	-0.729143	0.465914	0.998858
5S_dup41_seq_1532	528.608	-0.148783	0.204207	-0.728589	0.466253	0.998858
hsa-piR-10542	1.07615	0.572812	0.786313	0.728479	0.466321	0.998858
hsa-piR-11755	1.93753	0.372488	0.511523	0.728194	0.466495	0.998858
hsa-miR-632	0.380328	-0.838101	1.15116	-0.728046	0.466585	0.998858
hsa-piR-14861	5.08893	-0.260248	0.357587	-0.727788	0.466743	0.998858
hsa-piR-26335	0.591218	-0.785238	1.07911	-0.727671	0.466815	0.998858
hsa-piR-2428	0.355011	0.883866	1.2149	0.72752	0.466908	0.998858
5S_dup13_seq_844	0.547564	0.888367	1.22156	0.727242	0.467078	0.998858
hsa-piR-30451	0.641666	-0.65863	0.906069	-0.72691	0.467281	0.998858
5S_dup5_seq_450	4.1225	-0.278458	0.383149	-0.726762	0.467372	0.998858
hsa-miR-29b-2-5p	3.24637	0.341002	0.469341	0.726555	0.467499	0.998858
hsa-piR-26125	0.660876	-0.679068	0.934885	-0.726366	0.467615	0.998858
hsa-piR-10051	0.511404	0.85475	1.17753	0.725885	0.46791	0.998858
tRNA-Lys-TTT-7-1	0.751954	-0.572511	0.789038	-0.725581	0.468096	0.998858
hsa-piR-13296	0.250872	-1.01849	1.40497	-0.72492	0.468501	0.998858
hsa-piR-23965	0.578714	-0.79011	1.09031	-0.724664	0.468658	0.998858
hsa-piR-13518	0.215711	1.14826	1.58639	0.723818	0.469178	0.998858
hsa-piR-10848	1.04986	-0.625423	0.864563	-0.723398	0.469435	0.998858
hsa-piR-30840	3.12294	-0.352274	0.487093	-0.723217	0.469547	0.998858
hsa-piR-8083	0.742006	0.659636	0.912154	0.723163	0.46958	0.998858
hsa-piR-27214	0.283616	-0.911532	1.26128	-0.722706	0.469861	0.998858
5S_seq_442	22.2932	0.187301	0.259243	0.722491	0.469993	0.998858
hsa-piR-8018	1.06662	0.649949	0.899664	0.722436	0.470027	0.998858
hsa-piR-4205	0.273669	-0.934381	1.29368	-0.722264	0.470132	0.998858
hsa-piR-13333	0.159632	-1.20225	1.66557	-0.721827	0.470401	0.998858
LSU-rRNA_Hsa_dup8_seq_174	8.816	-0.25429	0.352525	-0.72134	0.470701	0.998858
hsa-piR-23416	0.901225	-0.53053	0.735842	-0.720983	0.47092	0.998858
tRNA-Cys-ACA-1-1	94.0845	-0.314053	0.436096	-0.720148	0.471434	0.998858
5S_dup19_seq_1104	3.11309	-0.386547	0.536821	-0.720067	0.471484	0.998858
hsa-piR-8356	0.596527	-0.633481	0.880031	-0.719839	0.471624	0.998858
hsa-piR-29396	0.280606	1.09073	1.51578	0.71958	0.471783	0.998858
hsa-piR-13105	0.288625	-0.914235	1.27168	-0.718916	0.472193	0.998858
tRNA-Gln-CTG-9-1	0.988291	0.508035	0.706687	0.718896	0.472205	0.998858
hsa-piR-4455	1.53516	-0.488615	0.67973	-0.718837	0.472241	0.998858
hsa-piR-26525	1.01339	0.530209	0.73775	0.718683	0.472336	0.998858
hsa-piR-5267	0.363736	-0.916716	1.27656	-0.718116	0.472686	0.998858
hsa-piR-2404	2.32798	-0.369114	0.51407	-0.718022	0.472744	0.998858
tRNA-Lys-TTT-5-1	560.498	0.191818	0.267345	0.717493	0.47307	0.998858
hsa-piR-30915	1.91895	0.525759	0.733766	0.716521	0.47367	0.998858
hsa-piR-15214	0.221957	-1.00429	1.40175	-0.716454	0.473711	0.998858
hsa-piR-21297	0.222876	-1.13954	1.59184	-0.715864	0.474075	0.998858
hsa-piR-25490	0.327196	-1.0206	1.42579	-0.715812	0.474107	0.998858
hsa-piR-27119	0.576918	-0.779768	1.08936	-0.715806	0.474111	0.998858
LSU-rRNA_Hsa_dup3_seq_298	489.136	0.192896	0.26962	0.715438	0.474339	0.998858
hsa-piR-19347	0.241831	0.903216	1.26256	0.715383	0.474372	0.998858
hsa-miR-376c-3p	1.15073	0.494723	0.691701	0.715228	0.474468	0.998858
5S_dup45_seq_1135	989.6	0.115935	0.162145	0.715012	0.474602	0.998858
hsa-piR-18848	1.29641	-0.524545	0.733905	-0.714731	0.474775	0.998858
hsa-piR-26365	1.97589	0.427858	0.598967	0.714327	0.475025	0.998858
hsa-piR-21698	0.274053	0.900118	1.26064	0.714017	0.475217	0.998858
hsa-piR-10470	0.364256	0.897109	1.25665	0.713891	0.475295	0.998858
hsa-miR-3144-3p	0.389328	-0.891549	1.24917	-0.713713	0.475404	0.998858
hsa-piR-14831	0.306107	-0.895709	1.25529	-0.713547	0.475507	0.998858
hsa-piR-25697	2.05801	-0.442785	0.620644	-0.713428	0.475581	0.998858
hsa-piR-28946	0.993107	0.654688	0.918049	0.71313	0.475766	0.998858
hsa-miR-135a-2-3p	17.5357	0.218286	0.306181	0.712929	0.47589	0.998858
5S_dup27_seq_1464	40.7608	0.137406	0.192775	0.71278	0.475982	0.998858
hsa-piR-12940	0.464587	-0.687092	0.964512	-0.712373	0.476234	0.998858
tRNA-Ala-TGC-5-1	195.875	0.157641	0.221301	0.712335	0.476257	0.998858
tRNA-Asn-GTT-11-1	0.488018	-0.768476	1.0793	-0.712014	0.476456	0.998858
hsa-piR-1150	26.5038	0.240497	0.337847	0.71185	0.476558	0.998858
hsa-piR-19333	3.27348	0.304698	0.428071	0.711793	0.476593	0.998858
hsa-piR-14578	0.257059	1.12558	1.58284	0.711115	0.477013	0.998858
hsa-piR-19180	14.3775	0.200716	0.282426	0.710684	0.47728	0.998858
hsa-piR-26748	4.12192	0.294876	0.41505	0.710459	0.477419	0.998858
hsa-miR-1306-3p	0.998907	0.840563	1.18336	0.710322	0.477504	0.998858
hsa-piR-29873	0.330898	0.971495	1.36841	0.709944	0.477739	0.998858
hsa-piR-25556	1.88098	-0.412838	0.581733	-0.70967	0.477909	0.998858
LSU-rRNA_Hsa_dup1_seq_879	573.33	0.184838	0.260582	0.70933	0.478119	0.998858
hsa-piR-23443	0.223003	1.11177	1.56887	0.708646	0.478544	0.998858
hsa-piR-17839	0.175646	1.02258	1.44413	0.708094	0.478887	0.998858
hsa-miR-7853-5p	0.327795	1.04978	1.4828	0.707973	0.478962	0.998858
hsa-piR-28983	1.25377	-0.496907	0.702267	-0.707575	0.479209	0.998858
hsa-piR-4301	2.20752	-0.467623	0.661335	-0.707089	0.479511	0.998858
hsa-piR-25832	2.162	-0.42061	0.594981	-0.70693	0.47961	0.998858
5S_dup31_seq_1522	1.92708	0.480873	0.680254	0.706903	0.479627	0.998858
5S_dup1_seq_705	209.373	-0.140899	0.199463	-0.70639	0.479946	0.998858
hsa-miR-30d-5p	1390.36	0.196878	0.278769	0.706241	0.480038	0.998858
hsa-miR-939-5p	0.24314	-1.13864	1.61282	-0.705992	0.480193	0.998858
hsa-piR-12356	0.212697	-1.00323	1.42145	-0.705776	0.480327	0.998858
hsa-miR-10b-5p	3501.85	0.207633	0.29441	0.70525	0.480655	0.998858
hsa-piR-22401	0.295998	-0.821609	1.16501	-0.705236	0.480663	0.998858
hsa-piR-16641	0.601844	-0.729698	1.03497	-0.705039	0.480786	0.998858
hsa-piR-32122	0.234811	-1.12473	1.59545	-0.704959	0.480836	0.998858
hsa-piR-8604	1.40659	0.46659	0.662234	0.70457	0.481078	0.998858
hsa-piR-29291	0.213578	-1.28629	1.82647	-0.704249	0.481278	0.998858
hsa-piR-5299	6.56516	-0.282009	0.400607	-0.703954	0.481461	0.998858
hsa-piR-27698	1.28365	-0.468195	0.665118	-0.703928	0.481477	0.998858
5S_dup21_seq_1458	0.259441	-0.977735	1.39037	-0.703221	0.481918	0.998858
hsa-piR-1408	0.365397	-1.18484	1.68506	-0.703146	0.481965	0.998858
hsa-piR-33158	3.39675	-0.31515	0.449087	-0.701757	0.482831	0.998858
hsa-piR-4029	1.09857	-0.550179	0.784252	-0.701533	0.48297	0.998858
hsa-piR-32652	0.85081	-0.762925	1.08769	-0.701419	0.483041	0.998858
hsa-miR-200b-3p	1948.32	0.256437	0.365658	0.701303	0.483114	0.998858
hsa-piR-10504	0.45698	-0.872596	1.24432	-0.701266	0.483137	0.998858
hsa-piR-15181	12.5615	-0.327895	0.467799	-0.700933	0.483345	0.998858
hsa-piR-3285	0.643307	0.701707	1.00111	0.700929	0.483348	0.998858
hsa-miR-500b-5p	0.401961	0.858846	1.22559	0.70076	0.483453	0.998858
tRNA-Ala-AGC-13-2	1.95093	0.363522	0.518855	0.700624	0.483538	0.998858
tRNA-SeC-TCA-2-1	114.837	-0.153476	0.219201	-0.700164	0.483825	0.998858
hsa-piR-641	0.17646	1.30155	1.85905	0.700115	0.483855	0.998858
hsa-piR-29111	0.338517	0.944346	1.34962	0.699713	0.484106	0.998858
hsa-piR-31002	0.978373	-0.57824	0.826471	-0.699649	0.484146	0.998858
hsa-piR-31363	0.600201	-0.704749	1.00735	-0.699608	0.484172	0.998858
5S_dup73_seq_796	0.750448	0.600347	0.858255	0.699497	0.484241	0.998858
hsa-piR-29740	4.6232	-0.36217	0.51779	-0.699453	0.484269	0.998858
hsa-piR-21840	0.632539	-0.755327	1.07996	-0.699406	0.484299	0.998858
LSU-rRNA_Hsa_dup10_seq_684	1547.96	0.131392	0.187965	0.699025	0.484536	0.998858
hsa-piR-19947	4.46354	0.274447	0.392699	0.698874	0.484631	0.998858
hsa-piR-7825	5.18532	-0.423824	0.606552	-0.698742	0.484713	0.998858
hsa-piR-26391	6.13012	-0.267068	0.382283	-0.698613	0.484794	0.998858
5S_dup64_seq_1561	2.25745	-0.398972	0.571166	-0.698521	0.484851	0.998858
hsa-miR-126-5p	1.69228	0.495258	0.709195	0.698339	0.484965	0.998858
hsa-piR-25302	2.4815	-0.351759	0.503734	-0.698303	0.484988	0.998858
5S_dup3_seq_280	1.04697	-0.489933	0.701664	-0.698244	0.485024	0.998858
hsa-piR-27280	1.01055	-0.741146	1.06179	-0.698018	0.485166	0.998858
hsa-piR-5068	0.270358	-0.904261	1.29659	-0.697414	0.485544	0.998858
hsa-piR-7527	3.07823	-0.337765	0.484326	-0.697393	0.485557	0.998858
hsa-piR-24437	1.57475	0.410035	0.588247	0.697046	0.485774	0.998858
hsa-piR-3193	7.84999	-0.328409	0.471277	-0.696849	0.485897	0.998858
hsa-piR-13025	0.968828	0.532217	0.764267	0.696376	0.486194	0.998858
hsa-miR-520g-3p	4.86324	0.343635	0.493861	0.695812	0.486547	0.998858
hsa-piR-31751	0.813342	0.544002	0.781831	0.695804	0.486551	0.998858
hsa-miR-378a-5p	0.274697	0.805024	1.15746	0.69551	0.486736	0.998858
hsa-piR-32076	0.361698	-0.859856	1.23841	-0.694324	0.487479	0.998858
hsa-piR-10445	0.518315	-0.75955	1.09399	-0.694297	0.487496	0.998858
hsa-piR-24713	3.33349	0.338101	0.486993	0.694262	0.487518	0.998858
hsa-piR-17909	1.61327	0.504047	0.726037	0.694245	0.487528	0.998858
hsa-miR-429	268.023	0.281217	0.405123	0.694153	0.487586	0.998858
hsa-piR-12605	0.330485	-0.974013	1.40337	-0.694051	0.48765	0.998858
hsa-piR-29101	0.387017	-1.15515	1.66456	-0.693969	0.487702	0.998858
hsa-piR-18189	0.726723	0.539683	0.778237	0.693468	0.488016	0.998858
hsa-piR-24423	0.968615	0.466202	0.67262	0.693114	0.488238	0.998858
hsa-miR-222-5p	0.420923	-0.752646	1.08593	-0.693089	0.488254	0.998858
hsa-piR-20803	0.56952	-0.710957	1.02608	-0.692888	0.48838	0.998858
hsa-piR-33058	3.6835	-0.339222	0.48966	-0.69277	0.488454	0.998858
hsa-piR-18431	1.04302	0.550478	0.794757	0.692638	0.488537	0.998858
hsa-piR-13139	0.195955	-1.00318	1.44862	-0.692508	0.488618	0.998858
hsa-piR-450	0.680343	0.556611	0.803826	0.692452	0.488654	0.998858
hsa-piR-17384	0.889511	-0.617671	0.89211	-0.692371	0.488704	0.998858
hsa-piR-30374	0.585845	-0.814934	1.17712	-0.692313	0.488741	0.998858
hsa-piR-17035	0.290029	-0.88706	1.28146	-0.692228	0.488794	0.998858
tRNA-Lys-TTT-13-1	4.22547	0.23743	0.343153	0.691906	0.488996	0.998858
hsa-piR-11969	28.7426	-0.320604	0.463462	-0.691759	0.489089	0.998858
hsa-piR-17609	0.665321	-0.594535	0.859778	-0.691499	0.489252	0.998858
hsa-piR-25851	1.02634	0.492375	0.712184	0.691359	0.48934	0.998858
hsa-piR-6728	1.02357	0.545385	0.789134	0.691118	0.489491	0.998858
hsa-piR-12431	0.671739	-0.626738	0.906993	-0.691006	0.489562	0.998858
hsa-piR-6417	3.04605	-0.314179	0.455002	-0.690501	0.489879	0.998858
tRNA-Ala-AGC-13-1	0.917079	0.587632	0.851414	0.690184	0.490078	0.998858
5S_dup72_seq_794	1.53501	-0.473438	0.685976	-0.690167	0.490089	0.998858
hsa-piR-5351	8.63591	-0.224882	0.325909	-0.690015	0.490185	0.998858
hsa-miR-3661	0.346584	-0.753032	1.09166	-0.689806	0.490316	0.998858
5S_dup34_seq_1473	19.2976	0.168283	0.244005	0.689672	0.4904	0.998858
hsa-miR-140-5p	10.6435	0.264168	0.383249	0.689284	0.490644	0.998858
tRNA-Leu-TAG-4-1	0.184644	-1.28447	1.86406	-0.68907	0.490779	0.998858
hsa-piR-23638	0.184644	-1.28447	1.86406	-0.68907	0.490779	0.998858
hsa-piR-6811	0.463373	-0.800481	1.1627	-0.688469	0.491157	0.998858
hsa-piR-21409	0.818711	0.597399	0.867812	0.688396	0.491203	0.998858
hsa-miR-1909-5p	0.29083	0.96516	1.40469	0.687096	0.492022	0.998858
5S_dup45_seq_1077	1.36118	0.444219	0.646707	0.686894	0.49215	0.998858
5S_dup11_seq_894	1.35222	-0.536971	0.781818	-0.686824	0.492194	0.998858
hsa-miR-193b-3p	28.4954	-0.299343	0.435936	-0.686668	0.492292	0.998858
hsa-piR-21913	0.328297	0.950918	1.38493	0.686621	0.492322	0.998858
hsa-piR-14445	0.1916	-0.99948	1.45569	-0.686603	0.492333	0.998858
hsa-piR-5214	0.675605	0.74614	1.08714	0.686333	0.492503	0.998858
hsa-piR-4229	1.62426	-0.41243	0.601174	-0.686041	0.492687	0.998858
hsa-miR-30d-3p	2.83686	0.34019	0.495962	0.685919	0.492764	0.998858
hsa-piR-19319	1.0966	0.592339	0.863611	0.685886	0.492785	0.998858
5S_dup123_seq_131	2.21184	0.320237	0.467076	0.68562	0.492953	0.998858
hsa-miR-20b-5p	107.091	0.286065	0.417434	0.685294	0.493158	0.998858
hsa-piR-23309	0.473548	-0.836593	1.22096	-0.685191	0.493223	0.998858
hsa-piR-6995	0.237404	-1.07582	1.57011	-0.685187	0.493226	0.998858
tRNA-Cys-GCA-9-3	40.9543	-0.209844	0.306467	-0.684718	0.493522	0.998858
hsa-piR-29100	0.161125	-1.13262	1.65433	-0.684643	0.493569	0.998858
hsa-piR-31433	0.546931	0.634418	0.92777	0.68381	0.494095	0.998858
hsa-piR-26719	0.175993	-1.31039	1.91702	-0.683553	0.494258	0.998858
hsa-piR-9151	4.97043	0.278069	0.407103	0.683044	0.494579	0.998858
hsa-piR-1283	0.802964	0.533788	0.781861	0.682714	0.494787	0.998858
5S_dup15_seq_25	0.209008	1.07795	1.57899	0.68268	0.494809	0.998858
hsa-piR-6340	0.318994	-0.923795	1.35464	-0.681946	0.495273	0.998858
5S_dup85_seq_810	2.57701	-0.310236	0.45517	-0.681583	0.495502	0.998858
hsa-piR-23504	2.25302	0.33358	0.489616	0.68131	0.495675	0.998858
hsa-piR-8599	2.45881	-0.313007	0.459434	-0.681289	0.495689	0.998858
hsa-piR-3828	0.685258	-0.705523	1.03594	-0.681044	0.495844	0.998858
hsa-piR-31591	0.589315	-0.660782	0.971325	-0.68029	0.496321	0.998858
hsa-piR-17199	0.502054	-0.646802	0.950804	-0.680269	0.496334	0.998858
hsa-piR-13474	0.316782	-0.836054	1.22934	-0.680082	0.496453	0.998858
hsa-miR-520b-5p	0.470438	0.661487	0.972955	0.679875	0.496584	0.998858
hsa-piR-31536	6.20092	0.2294	0.337456	0.67979	0.496637	0.998858
hsa-piR-4001	0.368469	-0.772221	1.13608	-0.679723	0.49668	0.998858
hsa-miR-21-5p	4826.09	0.220382	0.324511	0.67912	0.497062	0.998858
hsa-piR-5411	0.487018	-0.680166	1.00159	-0.679086	0.497083	0.998858
hsa-piR-21375	0.307274	-0.976753	1.43835	-0.679077	0.497089	0.998858
hsa-piR-22429	0.880267	-0.616996	0.908599	-0.679062	0.497098	0.998858
hsa-piR-27068	0.266509	-0.796177	1.17304	-0.678728	0.49731	0.998858
hsa-piR-16453	0.314594	-0.903053	1.33103	-0.678459	0.49748	0.998858
hsa-miR-7515	0.237632	-1.08998	1.60781	-0.677927	0.497818	0.998858
hsa-piR-5219	0.478627	-0.792471	1.16951	-0.677607	0.498021	0.998858
hsa-piR-13557	0.172036	-1.29088	1.90515	-0.677573	0.498043	0.998858
5S_dup62_seq_784	0.760347	-0.615946	0.910021	-0.676848	0.498502	0.998858
[truncated: 16,766 more rows]

## Sheet: Table S8 tsRNA Donkin, ITAS
	baseMean	log2FoldChange	lfcSE	stat	pvalue	padj
tRF-38-P4R8YP9LON4VN18_799	34.3131	-24.2897	2.98144	-8.14697	3.7314e-16	1.0896e-13
tRF-27-79MP9P9NH5N_6856	7.57829	-22.2467	2.98342	-7.45678	8.866e-14	1.2944e-11
tRF-41-PSQP4PW3FJIKE7UMD_431	74.2588	8.32279	2.15024	3.87064	0.00010855	0.0105656
tRF-30-82FN5KYUHR8W_3821	2.23793	-3.23577	1.29298	-2.50257	0.0123297	0.491012
tRF-30-941QKS3W2VR0_3775	11.9198	4.85117	1.96279	2.47156	0.0134524	0.491012
tRF-30-Q86N7KYUSRHY_3305	153.866	-4.3867	1.71125	-2.56345	0.0103637	0.491012
tRF-45-SX73V2Y8L981PV6RRN_119	3323.31	-0.451583	0.179953	-2.50945	0.0120921	0.491012
tRF-50-86J8WPMN1E8Y7Z2R1HPS_14	1618.26	1.23058	0.488665	2.51825	0.0117939	0.491012
tRF-39-87R8WP9I1EWJQZFV_714	35.8718	-0.610721	0.271933	-2.24585	0.0247135	0.801817
tRF-38-EH623K7SIR3DR2DV_844	7.09499	6.48965	2.9678	2.18669	0.0287655	0.839952
tRF-39-9EDJHP3R6J9KIWIZ_708	35.6918	-1.14879	0.537911	-2.13565	0.0327082	0.868253
tRF-30-82FN5KYUSRYW_3819	2.18563	-4.01233	2.0721	-1.93636	0.052824	0.90733
tRF-34-LR6LQ6S8V0J6HW_1804	86.5123	0.840703	0.431557	1.94807	0.0514065	0.90733
tRF-35-JJ6RRNLIK898O1_1567	39.247	-3.15823	1.58309	-1.99498	0.0460454	0.90733
tRF-36-V0J8O9YEKPRS93E_1165	6.97115	-6.02704	2.98365	-2.02002	0.0433809	0.90733
tRF-41-86J8WPMN1E8Y7Z2RB_474	9.0351	5.80979	2.96216	1.96134	0.0498398	0.90733
tRF-45-L7S5QKF1R3WE8RO86J_135	4.58476	5.87028	2.96948	1.97687	0.0480566	0.90733
tRF-22-Q9B1XSRI5_14085	16.6217	-0.4733	0.987654	-0.479217	0.631785	0.997634
tRF-26-0P58309NDJ0_8219	25.7582	-0.39423	2.28886	-0.172239	0.86325	0.997634
tRF-26-79MP9P9NH50_7974	70.3368	0.0255893	2.46436	0.0103838	0.991715	0.997634
tRF-26-OUR8309NDJ0_7465	454.668	-0.687704	2.51558	-0.273378	0.784562	0.997634
tRF-26-RK9P4P9L5HD_7343	2.39518	-4.50648	2.98888	-1.50775	0.131619	0.997634
tRF-26-RK9P4P9L5HE_7342	6.25271	-2.73894	2.21583	-1.23608	0.21643	0.997634
tRF-26-RKVP4P9L5HD_7337	2.50699	-0.192723	2.94186	-0.0655106	0.947767	0.997634
tRF-26-RPM8309MUKD_7293	75.155	-1.78935	2.17783	-0.82162	0.411293	0.997634
tRF-26-RPM830MMUKD_7292	1271.61	-1.20085	2.64647	-0.453756	0.650004	0.997634
tRF-26-S3M8309NDJ0_7268	376.582	-0.549682	2.49591	-0.220233	0.82569	0.997634
tRF-26-SP5830MMUKD_7241	17.5901	-1.92758	2.1399	-0.900781	0.367705	0.997634
tRF-27-JM8LHYD33UN_6538	13.6899	-0.973928	1.22277	-0.796495	0.425744	0.997634
tRF-27-OUR8309NDJL_6354	85.2737	-0.963836	1.84023	-0.523757	0.600447	0.997634
tRF-27-PJ60MV9JKL1_6342	34.4623	-1.35817	1.21039	-1.12209	0.261825	0.997634
tRF-27-R2IP4OI3FJM_6281	74.4955	-0.446729	1.55649	-0.28701	0.774105	0.997634
tRF-27-R8ZP9LON4V3_6261	2.00678	-0.386055	1.10999	-0.3478	0.72799	0.997634
tRF-27-RK9P4P9L5HO_6248	3.66978	-1.73899	2.31072	-0.752574	0.451706	0.997634
tRF-27-RPM8309MUKK_6231	0.7713	-1.91677	2.78093	-0.689254	0.490663	0.997634
tRF-27-RPM830MMUKK_6230	21.862	-0.240934	2.9143	-0.0826732	0.934111	0.997634
tRF-27-S3M8309ND3L_6209	27.7612	-0.993036	1.85733	-0.534657	0.592887	0.997634
tRF-27-S3M8309NDJL_6208	59.4814	0.35339	1.95902	0.180391	0.856846	0.997634
tRF-28-79MP9P9NH50E_5851	39.7229	1.64754	2.12767	0.774337	0.438731	0.997634
tRF-28-FNKQWYL1M30K_5656	10.7585	-0.831652	1.10401	-0.753302	0.451269	0.997634
tRF-28-R118LO9EBV0D_5360	11.9654	0.0289341	0.855956	0.0338033	0.973034	0.997634
tRF-28-RK9P4P9L5HDI_5334	0.318268	-1.86669	3.01618	-0.618891	0.535988	0.997634
tRF-28-RPM8309MUKDM_5316	50.5379	0.280764	2.91189	0.0964199	0.923187	0.997634
tRF-28-RPM830MMUKDM_5315	861.352	0.544844	2.91032	0.187211	0.851495	0.997634
tRF-28-U45O6WNDY8DD_5267	17.7228	-0.503848	0.684653	-0.735918	0.46178	0.997634
tRF-29-5SVP9N15WVIP_4981	10.672	-0.070554	0.757731	-0.0931122	0.925814	0.997634
tRF-29-73VL8RPY8H1Y_4934	41.5299	-0.0851891	0.581223	-0.146569	0.883472	0.997634
tRF-29-79MP9P9NH52Q_4926	86.2569	0.465304	0.607192	0.766322	0.443485	0.997634
tRF-29-83ML5F82NZED_4891	198.389	-0.44412	1.54567	-0.287331	0.773859	0.997634
tRF-29-OUR8309NDJI0_4466	282.101	1.9956	1.23808	1.61185	0.106994	0.997634
tRF-29-PJ58309NDJ2P_4454	77.3385	0.292368	0.53856	0.54287	0.587219	0.997634
tRF-29-RXSMKVNMEHIS_4315	10.079	-0.716304	1.31353	-0.545326	0.585529	0.997634
tRF-29-S3M8309NDJI0_4308	344.707	1.81064	1.06278	1.70369	0.0884391	0.997634
tRF-29-S5R8309NDJ2P_4306	62.1828	0.199026	0.493504	0.403292	0.686734	0.997634
tRF-30-0P58309NDJ78_4096	24.0203	0.708314	0.899938	0.78707	0.431241	0.997634
tRF-30-1QKS3W2VR008_4054	13.1494	0.0980884	0.425617	0.230461	0.817733	0.997634
tRF-30-395P4PN3FJ6K_4011	12.616	0.378469	0.568435	0.665808	0.505534	0.997634
tRF-30-4E6L1FZJ47D1_3988	16.7568	-0.902418	0.601158	-1.50113	0.133321	0.997634
tRF-30-4VN1EH6KK87S_3974	10.5832	-0.968535	0.72178	-1.34187	0.179638	0.997634
tRF-30-5L8RPY8HM2OS_3939	26.01	0.515687	1.88232	0.273963	0.784113	0.997634
tRF-30-70VR3196L85D_3873	97.292	0.67386	0.858259	0.785147	0.432367	0.997634
tRF-30-735L8RPY8HM2_3871	458.864	0.199815	0.283931	0.703746	0.481591	0.997634
tRF-30-73VL4YMY91PJ_3869	144.977	1.65603	2.22465	0.744402	0.456633	0.997634
tRF-30-79MP9P9NH57Y_3858	11.284	0.263461	1.87775	0.140307	0.888418	0.997634
tRF-30-8J4S5IR2Z4R9_3796	9.06558	0.125788	0.589609	0.213341	0.831061	0.997634
tRF-30-8XF6RE987S1R_3782	56.4716	-2.14434	2.63611	-0.813447	0.415962	0.997634
tRF-30-9N1QKS3W2VR0_3758	14.6688	1.16362	1.26929	0.916746	0.359276	0.997634
tRF-30-HJ83RPFQZDXP_3593	39.8508	0.666024	1.0799	0.616746	0.537403	0.997634
tRF-30-I3VF4YOZXEKJ_3573	43.8257	0.339809	0.610156	0.556922	0.577581	0.997634
tRF-30-JZOYJE22RRN3_3505	11.4804	-0.362805	0.502356	-0.722208	0.470167	0.997634
tRF-30-PXI2UKJ6P9M0_3321	53.7734	-0.876507	0.649001	-1.35055	0.17684	0.997634
tRF-30-Q2FWQ8P6U1J0_3310	41.9991	0.0760382	1.01452	0.0749496	0.940255	0.997634
tRF-30-R2IP4OI3FJQS_3264	42.3515	2.79808	1.95475	1.43143	0.152308	0.997634
tRF-30-S3M8309ND358_3169	8.64634	1.80756	1.27336	1.41952	0.155747	0.997634
tRF-30-S4I7LZM3Q01M_3166	15.0633	0.542216	0.708244	0.765578	0.443927	0.997634
tRF-30-V470VR3196L8_3101	133.384	0.316452	0.339459	0.932224	0.351221	0.997634
tRF-30-V47PVR3196L8_3099	34.3474	0.320571	0.532758	0.60172	0.54736	0.997634
tRF-30-W7W26WRNLEK5_3078	12.5379	-0.47805	0.396246	-1.20645	0.227645	0.997634
tRF-30-X3HRL7S5QKF1_3043	19.8546	1.61048	1.55307	1.03697	0.299751	0.997634
tRF-31-821IQ4YUH5S80_2863	20.4121	-3.01159	1.67393	-1.79911	0.0720019	0.997634
tRF-31-F91KV0JZOYJED_2825	44.9898	-0.32266	0.306661	-1.05217	0.29272	0.997634
tRF-31-I0E7UM8KSWRND_2805	11.0034	-0.33994	0.577924	-0.588208	0.556392	0.997634
tRF-31-JMRPFQJDZXHYB_2784	14.1129	-0.261432	2.42955	-0.107605	0.914309	0.997634
tRF-31-RK9P4P9L5HJVE_2690	70.1228	0.306991	0.964133	0.318412	0.750173	0.997634
tRF-32-821IQ4YUH5S84_2541	23.2526	-3.15748	1.78858	-1.76535	0.0775046	0.997634
tRF-32-P4R8YP9LON4V3_2404	2779.32	0.086798	1.89443	0.0458174	0.963456	0.997634
tRF-32-PNR8YO9LON4V3_2396	22.7589	0.347675	0.394558	0.881177	0.378222	0.997634
tRF-32-Q1Q89P9L8422Q_2386	0.39736	-1.67825	3.01385	-0.556846	0.577632	0.997634
tRF-32-R29P4P9L5HLVQ_2365	90.505	1.03247	1.05668	0.977084	0.328527	0.997634
tRF-32-RK9P4P9L5FZU3_2353	161.31	0.410645	1.75259	0.234308	0.814746	0.997634
tRF-32-RK9P4P9L5HJVQ_2352	50.5117	-0.695938	0.908272	-0.766222	0.443544	0.997634
tRF-32-RKVP4P9L5FZU3_2346	2.91629	1.41318	2.94099	0.480513	0.630863	0.997634
tRF-32-RKVP4P9L5HMVQ_2345	33.5684	-0.101214	0.577181	-0.17536	0.860797	0.997634
tRF-33-79MP9P9NH57YD3_2217	28.0947	0.67139	0.588324	1.14119	0.253791	0.997634
tRF-33-79MP9PMNH5ISD3_2216	508.789	0.248736	0.303212	0.820335	0.412025	0.997634
tRF-33-87R8WP9N1EWJDW_2204	5011.55	-1.23613	1.86448	-0.662987	0.507339	0.997634
tRF-33-I26WRNLEK5YYU_2147	48.3293	-0.00661822	0.405234	-0.0163318	0.98697	0.997634
tRF-33-OUR8309NDJ58W_2069	11.5729	0.0593811	0.531071	0.111814	0.910971	0.997634
tRF-33-P4R8YP9LON4VDP_2067	2876.12	0.942224	1.15016	0.819211	0.412666	0.997634
tRF-33-PER8YP9LON4VDQ_2065	22.4587	0.00775013	0.538676	0.0143874	0.988521	0.997634
tRF-33-PS5P4PW3FJHPW_2061	0.323991	-1.87184	3.01589	-0.62066	0.534823	0.997634
tRF-33-Q1Q89P9L842205_2051	66.0148	0.4506	2.22811	0.202234	0.839734	0.997634
tRF-33-Q99P9P9NH57SD3_2050	24.8788	-0.428194	1.27652	-0.335438	0.737294	0.997634
tRF-33-QNR8VP9NFQFYD3_2043	29.5604	1.45711	1.05756	1.37779	0.168267	0.997634
tRF-33-R29P4P9L5HLV05_2038	263.946	0.0389414	0.330487	0.11783	0.906202	0.997634
tRF-33-R2IP4OI3FJQSDQ_2037	17.2364	0.590715	0.717521	0.823272	0.410353	0.997634
tRF-33-RK9P4P9L5FZUDP_2027	269.109	-0.403001	2.07437	-0.194277	0.845959	0.997634
tRF-33-RK9P4P9L5HJV0Q_2026	24.1458	-1.09314	1.08025	-1.01194	0.311568	0.997634
tRF-33-RKJP4P9L5FZUDP_2022	50.0134	-0.63771	2.15977	-0.295268	0.767789	0.997634
tRF-33-RKVP4P9L5FZUDP_2019	58.2844	-0.696997	2.26672	-0.307492	0.758469	0.997634
tRF-33-RKVP4PRL5FZUDP_2018	124.617	-0.934527	2.5686	-0.363827	0.715987	0.997634
tRF-33-X5Q4R9OMKM4WDM_1992	10.8686	-0.334584	0.367995	-0.909208	0.36324	0.997634
tRF-34-4R94SX73V2Y81W_1940	43.6854	-0.626898	1.66809	-0.375818	0.707052	0.997634
tRF-34-79MP9PMNH5IS15_1916	151.776	0.313639	0.472939	0.663171	0.507221	0.997634
tRF-34-821IQ4YUH5S82D_1909	33.5827	0.585441	1.18401	0.494456	0.620984	0.997634
tRF-34-82FN5KYUSRYW2D_1906	19.1799	0.780259	1.86178	0.419093	0.675148	0.997634
tRF-34-83RPFQZDXPHOHY_1904	33.3873	-0.00600356	0.33868	-0.0177263	0.985857	0.997634
tRF-34-94U47P299DZUFJ_1890	93.8335	-0.323171	0.472627	-0.683776	0.494116	0.997634
tRF-34-EH6KK87SIRM110_1863	23.0183	-0.507301	0.96845	-0.523827	0.600399	0.997634
tRF-34-JJ6RRNLIK898HR_1829	120.307	1.10934	1.10318	1.00558	0.314616	0.997634
tRF-34-PS5P4PW3FJHPEQ_1772	418.24	0.776632	1.62736	0.477233	0.633196	0.997634
tRF-34-Q1Q89P9L8422KJ_1763	424.599	0.0626524	0.794228	0.0788847	0.937124	0.997634
tRF-34-Q86N7KYUSRHY2D_1762	398.884	-0.915857	0.6799	-1.34705	0.177965	0.997634
tRF-34-Q99P9P9NH57S15_1761	220.349	0.859778	0.531522	1.61758	0.105754	0.997634
tRF-34-QNR8VP9NFQFY1Q_1758	25.1179	-0.33791	1.06439	-0.317467	0.750889	0.997634
tRF-34-R9JP9P9NH5SYHQ_1749	461.455	0.26636	0.761736	0.349676	0.726582	0.997634
tRF-34-R9JP9PMNH5SYHQ_1748	144.732	0.050082	0.339296	0.147606	0.882654	0.997634
tRF-34-RK9P4P9L5FZUHM_1746	329.476	0.278386	2.07995	0.133843	0.893527	0.997634
tRF-34-RKJP4P9L5FZUHM_1745	99.3889	1.10639	0.653181	1.69385	0.0902933	0.997634
tRF-34-RKVP4P9L5FZUHM_1742	14.0655	-0.67331	2.42878	-0.277222	0.78161	0.997634
tRF-34-RKVP4PRL5FZUHM_1741	437.606	0.0083674	0.32435	0.0257974	0.979419	0.997634
tRF-34-RPM830MMUKLYIE_1735	1107.85	-0.0513976	0.236221	-0.217583	0.827754	0.997634
tRF-35-0UFMEKYU0RSSX7_1691	9.7466	0.209438	0.803422	0.260682	0.794338	0.997634
tRF-35-18VBY9P9KHM2OR_1687	9.60241	0.521034	0.862981	0.603761	0.546002	0.997634
tRF-35-2VR0PSR9593J24_1672	10.5393	0.700177	1.7473	0.400718	0.688628	0.997634
tRF-35-79MP9PMNH5IS36_1653	47.9538	0.793654	1.01207	0.784187	0.43293	0.997634
tRF-35-821IQ4YUH5S8R6_1645	169.951	-0.277239	0.634683	-0.436814	0.662246	0.997634
tRF-35-82FN5KYUSRYWRS_1643	13.6999	-0.981948	1.27368	-0.77095	0.440736	0.997634
tRF-35-82FNPKYUS7PVRS_1642	54.0214	-0.859075	0.739279	-1.16204	0.245218	0.997634
tRF-35-86J8WPMN1E8Y7Z_1640	888.926	-0.436816	2.0786	-0.210149	0.833551	0.997634
tRF-35-87R8WP9N1EWJQ7_1637	22076.7	0.359352	0.307965	1.16686	0.243267	0.997634
tRF-35-897PVP941QKS3W_1635	133.122	-0.240864	1.05003	-0.229388	0.818567	0.997634
tRF-35-897PVP9N1QKS3W_1634	25.3383	0.402581	0.842535	0.477822	0.632777	0.997634
tRF-35-KKM1M3WD8S746D_1559	478.961	0.259526	1.02281	0.253739	0.799697	0.997634
tRF-35-KQWYL1M3WE8S68_1557	16.233	0.401301	1.29935	0.308846	0.757439	0.997634
tRF-35-L85DMKYOYRLHR0_1552	31.9501	-0.355059	1.59249	-0.222958	0.823568	0.997634
tRF-35-LBRY73W0K5KKOV_1549	19.3886	-0.141924	0.770859	-0.184112	0.853926	0.997634
tRF-35-O0789NLJK1JKE1_1531	11.7548	0.242142	0.890374	0.271955	0.785657	0.997634
tRF-35-P4R8YP9LON4VN1_1524	99.5847	-3.42191	2.75566	-1.24177	0.21432	0.997634
tRF-35-PS5P4PW3FJHPEZ_1520	2997.77	0.317117	0.450285	0.70426	0.481271	0.997634
tRF-35-Q1Q89P9L8422YR_1514	249.369	0.00675519	0.951969	0.00709602	0.994338	0.997634
tRF-35-Q99P9P9NH57S36_1513	34.0819	-0.508783	1.2697	-0.400711	0.688633	0.997634
tRF-35-QNR8VP9NFQFY39_1507	19.6559	0.0131018	1.16197	0.0112756	0.991004	0.997634
tRF-35-R9JP9P9NH5SYNX_1503	96.4374	1.30982	1.39426	0.939444	0.347503	0.997634
tRF-35-RK9P4P9L5FZUNF_1502	667.855	0.612055	0.567698	1.07814	0.280973	0.997634
tRF-35-RKVP4P9L5FZUNF_1499	68.1829	0.976432	1.84616	0.5289	0.596875	0.997634
tRF-35-RPM8309MUKLY5Z_1497	208.297	-0.0710486	0.332237	-0.213849	0.830665	0.997634
tRF-35-RPM830MMUKLY5Z_1496	282.689	-0.493405	0.453811	-1.08725	0.276927	0.997634
tRF-35-VF4YOZXEKJ5R5N_1480	11.848	-0.90893	1.78364	-0.509593	0.610337	0.997634
tRF-35-VUY9Q9R4L2RRM3_1479	12.4808	-0.304941	0.77246	-0.394766	0.693015	0.997634
tRF-35-Y3E7QN7JLP21W3_1470	9.12296	-0.209654	0.428188	-0.489631	0.624395	0.997634
tRF-36-0UFMQKYU0RSSX7D_1448	13.7814	0.189571	0.749128	0.253056	0.800225	0.997634
tRF-36-4R94SX73V2Y8L9E_1416	199.938	0.0602121	0.682512	0.0882213	0.929701	0.997634
tRF-36-79MP9PMNH5IS36D_1406	21.5301	0.528721	1.02534	0.515655	0.606095	0.997634
tRF-36-821IQ4YUH5S8R6D_1390	13.0394	1.42252	2.12695	0.668806	0.503619	0.997634
tRF-36-82FN5KYUHRYWRYD_1389	32.4532	0.446166	0.806023	0.55354	0.579894	0.997634
tRF-36-86J8WPMN1E8Y7ZD_1383	26.3563	3.65988	2.44068	1.49953	0.133735	0.997634
tRF-36-897PVP941QKS3WD_1379	261.8	0.355834	0.352028	1.01081	0.312108	0.997634
tRF-36-897PVP9N1QKS3WD_1378	16.1291	-0.0108107	1.1046	-0.00978695	0.992191	0.997634
tRF-36-EH623K76IR3DR20_1327	43.5349	-0.46271	1.65191	-0.280107	0.779396	0.997634
tRF-36-EH623K7SIR3DR20_1326	31.977	-2.63167	2.52007	-1.04428	0.296356	0.997634
tRF-36-FR6LQ6S8V0J6OZE_1305	27.2968	0.0437476	0.70239	0.0622839	0.950337	0.997634
tRF-36-HY13KK761RNNMJ0_1296	45.3977	-0.4134	1.45949	-0.283249	0.776986	0.997634
tRF-36-ISQI45LSM1M3WEE_1281	447.224	-0.184133	0.394117	-0.467204	0.640354	0.997634
tRF-36-JJ6RRNLIK898O1B_1266	118.749	-1.8437	1.18986	-1.54952	0.121257	0.997634
tRF-36-KKM1M3WD8S746DD_1258	21.777	-0.598598	1.81959	-0.328974	0.742175	0.997634
tRF-36-KPQJ3KYU4RRWRBD_1256	2.01774	4.6811	2.97537	1.57328	0.115654	0.997634
tRF-36-PS5P4PW3FJHPEZE_1219	2866.26	0.500247	0.372044	1.34459	0.178758	0.997634
tRF-36-PSQP4PW3FJIKE7E_1216	1706.88	0.150209	0.954528	0.157365	0.874957	0.997634
tRF-36-Q01M3KYOHR6HFRD_1214	8.75049	0.108488	0.769687	0.140951	0.887909	0.997634
tRF-36-Q1Q89P9L8422YRB_1213	252.882	1.59106	1.33265	1.19391	0.232515	0.997634
tRF-36-Q86N7KYUSRHYRSD_1211	150.204	1.68027	1.21013	1.38851	0.164983	0.997634
tRF-36-Q99P9P9NH57S36D_1209	16.1357	1.41554	1.31271	1.07833	0.280886	0.997634
tRF-36-QKF1R3WE8RO86JD_1205	3.37834	-3.58911	2.28416	-1.57131	0.116111	0.997634
tRF-36-QNR8VP9NFQFY39D_1202	9.9848	-0.420381	1.84693	-0.227611	0.819949	0.997634
tRF-36-R9JP9P9NH5SYNXD_1197	6.53381	2.30838	1.54218	1.49682	0.134439	0.997634
tRF-36-S4I7LZ93Q01M3KE_1178	68.9245	-0.0593373	0.348456	-0.170286	0.864785	0.997634
tRF-36-WURMJKYOSR99RHD_1143	11.0535	-1.21916	2.10947	-0.577945	0.563301	0.997634
tRF-36-XSXMSL73VL4YMYE_1138	1.37422	4.13017	2.98008	1.38593	0.16577	0.997634
tRF-36-XU53K876DRMD51D_1137	20.8424	0.584467	0.692259	0.84429	0.398507	0.997634
tRF-37-0668K87SERM4921_1106	5.43849	2.97249	2.93763	1.01187	0.311602	0.997634
tRF-37-801M38YOHSRVK7J_1073	22.4537	-0.178242	0.501185	-0.355641	0.722109	0.997634
tRF-37-821NQ4YOS5S8R6J_1068	12.9908	0.186242	1.06276	0.175243	0.860889	0.997634
tRF-37-82FN4KYU476YQSJ_1067	48.0343	-1.42876	0.877829	-1.6276	0.10361	0.997634
tRF-37-86J8WPMN1E8Y7Z2_1062	0.103932	-0.4591	3.03236	-0.151401	0.87966	0.997634
tRF-37-EHBK8RR95RMJ6B2_1029	19.0907	0.00210717	0.645435	0.00326473	0.997395	0.997634
tRF-37-F8DHXY6RHDK2RSI_1021	144.294	-0.120429	0.507884	-0.23712	0.812564	0.997634
tRF-37-HRL7S5QKF1R3WE5_1011	75.2672	-0.140289	0.323293	-0.433939	0.664333	0.997634
tRF-37-JMRPFQJDZXHY13J_1003	34.5489	1.37501	1.12878	1.21814	0.223172	0.997634
tRF-37-KKM1M3WD8S746D2_999	5.90051	-0.641904	1.53853	-0.417219	0.676518	0.997634
tRF-37-LPD3387SFRJ4O11_988	109.883	-0.583914	0.611338	-0.95514	0.339507	0.997634
tRF-37-QKF1R38E8RO86J2_971	8.68089	1.32848	1.95523	0.67945	0.496853	0.997634
tRF-37-QKF1R3WE8RO86J2_970	34.3896	-0.230505	1.9493	-0.11825	0.90587	0.997634
tRF-37-S41M3KYU8R6Q46J_958	8.28955	0.505939	0.576832	0.8771	0.380432	0.997634
tRF-37-V47PU9XW983FPD3_943	712.234	0.121169	0.510738	0.237243	0.812469	0.997634
tRF-37-V4QP596VZ631QJJ_942	39.7486	-0.144023	0.192873	-0.746721	0.455232	0.997634
tRF-37-XSXMSL73VL4YMYP_931	2.62818	-4.64579	2.98814	-1.55474	0.120007	0.997634
tRF-38-7P596VW631QJ3K05_881	91.6981	0.236023	0.359357	0.656792	0.511315	0.997634
tRF-38-821IQ4YUH5S8R6D2_878	9.93233	-0.139869	0.888126	-0.157488	0.87486	0.997634
tRF-38-82FN4KYU476YQSD2_875	32.8236	2.27575	1.2765	1.78281	0.0746172	0.997634
tRF-38-9LON4VN1EH6KK80E_866	69.9935	-0.776254	0.609626	-1.27333	0.202901	0.997634
tRF-38-EFOK8YR951K36DD1_846	40.1843	1.15489	1.2224	0.944776	0.344773	0.997634
tRF-38-FYRE987S1RJ7RMDV_834	237.148	0.133041	0.433485	0.306909	0.758913	0.997634
tRF-38-HPDEWP7SER9I69DV_829	13.8416	-0.278296	1.0684	-0.26048	0.794494	0.997634
tRF-38-HXD3KY7SHRRNWJV_826	65.1388	0.372013	0.413831	0.898949	0.36868	0.997634
tRF-38-HY13KK761RNNMJDV_825	37.9304	1.17936	1.44204	0.817839	0.413449	0.997634
tRF-38-LPD3387SFRJ4O1V_806	14.418	0.455407	1.62237	0.280704	0.778937	0.997634
tRF-38-PSQP4PW3FJIKE70F_794	599.395	1.19769	1.6026	0.747343	0.454857	0.997634
tRF-38-RXPIN2NYDRFU8U0E_789	15.3366	0.217007	0.746019	0.290887	0.771138	0.997634
tRF-39-2VF0S7RNLJKP9B11_735	32.3086	0.469645	0.78693	0.596807	0.550636	0.997634
tRF-39-86J8WPMN1E8Y7ZFV_716	265.21	-3.17049	2.91138	-1.089	0.276154	0.997634
tRF-39-87R8WP9N1EWJQ7FV_713	28.9993	1.21302	2.88845	0.419957	0.674517	0.997634
tRF-39-9LON4VN1EH6KK82Q_707	19.2682	0.54835	1.479	0.370757	0.710819	0.997634
tRF-39-HXD3KY7SHRRNWJE2_673	21.0447	0.31966	1.32534	0.241191	0.809407	0.997634
tRF-39-HY13KK761RNNMJI2_672	3.88796	0.831978	2.08778	0.398499	0.690263	0.997634
tRF-39-J9ZH0SR9593KMHFV_659	22.0075	1.22919	0.757105	1.62354	0.104475	0.997634
tRF-39-NB8PLML38BWS72E3_651	33.9549	-0.0387593	0.526942	-0.0735553	0.941364	0.997634
tRF-39-PSQP4PW3FJIKE727_645	1917.45	-0.0737302	0.746512	-0.0987663	0.921324	0.997634
tRF-39-S2P46INO86RM7KKK_637	521.09	-0.65643	0.652411	-1.00616	0.314339	0.997634
tRF-40-73V6M7QZ0HJBRR93_595	44.6154	1.0157	0.661241	1.53605	0.124526	0.997634
tRF-40-86J8WPMN1E8Y7Z2R_587	70.2272	-3.33607	2.35094	-1.41903	0.15589	0.997634
tRF-40-87R8WP9N1EWJQ72S_585	0.945079	3.30758	2.98437	1.1083	0.267731	0.997634
tRF-40-MEF91SS2PMFIZOWU_537	239.587	1.6663	1.30718	1.27473	0.202405	0.997634
tRF-40-P4R8YP9LON4VN1EH_533	1236.09	0.969358	2.26346	0.428265	0.668458	0.997634
tRF-40-PSQP4PW3FJIKE7UM_530	339.171	-0.0138601	1.57691	-0.00878937	0.992987	0.997634
tRF-41-6J9KIWRNL3KQNKW1B_481	21.2946	-0.722036	1.31092	-0.550784	0.581781	0.997634
tRF-41-JOWU1MN0YU09FKRFD_446	3.56826	-1.67081	2.94132	-0.568047	0.570003	0.997634
tRF-41-MQ18Y3E7QN7JLP21E_436	62.6456	1.09162	1.33265	0.819136	0.412709	0.997634
tRF-41-V2Y7RZ81JJ6RRNLID_413	14.2072	0.486483	2.68985	0.180858	0.856479	0.997634
tRF-41-W3FJIKE7UMKKSWRND_411	502.601	0.170858	0.252041	0.677897	0.497837	0.997634
tRF-42-86J8WPMN1E8Y7Z2RH_374	2662.14	-0.0846378	1.47411	-0.0574163	0.954214	0.997634
tRF-42-87R8WP9N1EWJQ72SJ_373	20312.4	-0.401721	0.601969	-0.667345	0.504552	0.997634
tRF-42-JMRPFQJDZXHY13KKN_352	27.4461	-0.400342	0.789651	-0.506985	0.612165	0.997634
tRF-42-M0NK5Y93W086W8SV2_345	99.5469	0.225149	0.743053	0.303006	0.761886	0.997634
tRF-42-PSQP4PW3FJIKE7UM5_338	97.9846	-0.805787	0.67146	-1.20005	0.230119	0.997634
tRF-42-PSQP4PW3FJIKE7UMJ_337	1712.38	-0.673289	0.532254	-1.26498	0.20588	0.997634
tRF-42-Q99P9P9NH57S362VL_336	40.0563	-0.157554	0.98046	-0.160694	0.872334	0.997634
tRF-42-WLV47PU9XW983FPD3_328	125.327	-0.965358	0.564704	-1.70949	0.0873594	0.997634
tRF-42-XSXMSL73VL4YMY91M_327	3207.22	-0.416432	0.601693	-0.6921	0.488874	0.997634
tRF-43-17NSRJ7KYUHR0VX6D2_311	443.572	-0.0668087	0.664352	-0.100562	0.919898	0.997634
tRF-43-3W2VR008R959KUMK9_301	790.972	0.825869	0.95854	0.86159	0.388913	0.997634
tRF-43-86J8WPMN1E8Y7Z2RY_292	3761.95	-0.0655504	1.02654	-0.0638558	0.949085	0.997634
tRF-43-87R8WP9N1EWJQ72SDK_291	2354.08	1.50844	1.55012	0.973112	0.330498	0.997634
tRF-43-8XF6RE987S1RJ7R3DV_289	1275.75	-0.520383	0.608442	-0.855272	0.392401	0.997634
tRF-43-L981PV6RRNLNK88KD6_265	133.52	0.348257	1.59469	0.218385	0.827129	0.997634
tRF-43-NO86RM7KYUPRENRHD2_262	452.088	0.778126	0.471478	1.6504	0.0988619	0.997634
tRF-43-NOW6RM7KYUPRENRHD2_261	15.8438	-0.389023	0.433859	-0.896657	0.369902	0.997634
tRF-43-P4R8YP9LON4VN1EHDX_258	5376.02	-0.151764	0.773425	-0.196223	0.844435	0.997634
tRF-43-PY8HM2OSRNLNKSEKDS_255	1910.64	-0.581118	0.85446	-0.6801	0.496441	0.997634
tRF-43-Q99P9P9NH57S362VD6_253	20.6514	-0.00539424	1.81885	-0.00296574	0.997634	0.997634
tRF-43-R9JP9P9NH5SYNX2VX_250	304.605	0.0943708	0.409628	0.230382	0.817795	0.997634
tRF-43-R9JP9PMNH5SYNX2VX_249	35.4843	0.0283455	0.419516	0.0675671	0.94613	0.997634
tRF-43-W282FNPKYUS7PVRSD2_244	23.8799	-0.0843649	0.778573	-0.108358	0.913711	0.997634
tRF-43-X6L85J3KYUYR6RIFD2_240	21.452	0.567031	0.553514	1.02442	0.305637	0.997634
tRF-44-46S9Y8RH93WB863II2_221	232.153	0.0594798	0.323056	0.184116	0.853922	0.997634
tRF-44-6978WPRLXN4VY87HES_217	1538.34	-0.0943927	0.153126	-0.616439	0.537605	0.997634
tRF-44-83ML5F924ZDRJKW42E_215	949.274	-0.402367	0.437299	-0.920118	0.357511	0.997634
tRF-44-87R8WP9N1EWJQ72S1M_214	1119.04	0.941227	1.35344	0.695435	0.486783	0.997634
tRF-44-8LHYD33U7SB7J0RJE2_212	41.9046	-0.467461	1.19533	-0.391071	0.695745	0.997634
tRF-44-8LHYD3MU7SF725RJE2_211	51.2772	-0.0262145	0.429642	-0.0610146	0.951348	0.997634
tRF-44-8XF6RE987S1R2RR3E2_209	25.9243	-0.41967	0.52816	-0.794589	0.426852	0.997634
tRF-44-L7S5QKF1R3WE8RO8IS_188	292.029	-0.164312	0.764857	-0.214826	0.829903	0.997634
tRF-44-PY8HM2OSRNLNKSEKH9_181	0.864561	3.23277	2.98499	1.08301	0.278805	0.997634
tRF-45-3W2VR008R959KUMKF6_158	65.646	-0.807346	1.44246	-0.559703	0.575682	0.997634
tRF-45-4QD7OK8Y19O182RK26_156	136.161	-0.317141	0.317892	-0.997638	0.318455	0.997634
tRF-45-7Z2R1HPSR9O9337KB6_151	306.692	0.011569	1.34732	0.00858667	0.993149	0.997634
tRF-45-9NJ4S2I7L7P5QK11M3_148	112.374	0.189204	2.37527	0.079656	0.936511	0.997634
tRF-45-L7S5QKF1R38E8RO86J_136	98.1409	0.132991	0.484859	0.274288	0.783864	0.997634
tRF-45-P4R8YP9LON4VN1EH6K_127	5223.2	0.322452	0.484106	0.666077	0.505362	0.997634
tRF-45-PW5SVP9N15WV7W6SJF_125	1676.3	1.02259	0.586022	1.74496	0.0809914	0.997634
tRF-45-PY8HM2OSRNLNKSEK51_124	94.8827	0.668799	2.83364	0.236021	0.813416	0.997634
tRF-46-46SQYU9H93WB863IP5D_103	364.688	-0.528566	0.454874	-1.162	0.245234	0.997634
tRF-46-87R8WP9N1EWJQ72S3H0_99	543.728	3.08814	2.4414	1.2649	0.205906	0.997634
tRF-46-EZUMXKS6RN23KYY8Q1B_92	10.0195	-1.06311	1.60583	-0.662028	0.507953	0.997634
tRF-47-R8YP9LON4VN1EH6KK8N_36	774.291	-0.667324	0.497044	-1.34259	0.179406	0.997634
tRF-47-V2Y7RZ81JJ6RRNLIK8P_32	137.537	-0.791603	0.615689	-1.28572	0.198541	0.997634
tRF-49-WJQ72S3HPSR95933JK0V_20	210.62	0.132585	0.828723	0.159987	0.872891	0.997634
tRF-50-87R8WP9N1EWJQ72S3HPS_13	2029.78	-0.689183	0.42007	-1.64064	0.100872	0.997634
tRF-50-I89NJ4S2I7L7P5QK11M3_10	9.9658	2.39575	1.69136	1.41646	0.156641	0.997634
tRF-50-IR9NY5KKM1M3WD8S746D_9	1423.8	-0.0387754	0.431561	-0.0898491	0.928407	0.997634
tRF-50-Q1Q89P9L8422YRI7XUK8_6	424.207	0.0322345	0.257144	0.125356	0.900242	0.997634
tRF-50-WJQ72S3HPSR95933JKB6_3	185.206	-1.10914	1.15606	-0.959414	0.33735	0.997634
tRF-25-1KVUY9QZR4_9541	0	0	0	0	1
tRF-25-73VL4YLY91_9326	0	0	0	0	1
tRF-25-79MP9P9NH5_9312	0	0	0	0	1
tRF-25-OUR8309NDJ_8737	0	0	0	0	1
tRF-25-RPM830MMUK_8487	0	0	0	0	1
tRF-25-S3M8309NDJ_8458	0	0	0	0	1
tRF-26-79MP9PMNH5B_7973	0	0	0	0	1
tRF-29-RPM830MMUK1W_4332	0	0	0	0	1
tRF-29-V47PU9XW981M_4251	0	0	0	0	1
tRF-31-S6RN23KYY8Q1B_2671	0	0	0	0	1
tRF-33-P46INO86RM7K05_2068	0	0	0	0	1
tRF-34-P4R8YP9LON4VHM_1777	0	0	0	0	1
tRF-36-87R8WP9N1EWJQ7D_1380	0	0	0	0	1
tRF-36-P4R8YP9LON4VN1B_1224	0	0	0	0	1
tRF-39-81JJ6RRNLIK898HR_718	0	0	0	0	1
tRF-40-PW5SVP9N15WV7W6S_529	0	0	0	0	1
tRF-40-XSXMSL73VL4YMY91_510	0	0	0	0	1

## Sheet: Table S9 sRNA Hua, SPORTS
	baseMean	log2FoldChange	lfcSE	stat	pvalue	padj
mature-tRNA-Ala-AGC	954.007	1.46858	0.362498	4.05128	5.0939e-05	0.00626551
mature-tRNA-Leu-CAG	159.916	1.08456	0.320454	3.38445	0.00071322	0.0407089
hsa-mir-100	598.959	-0.390347	0.118555	-3.29253	0.0009929	0.0407089
mature-tRNA-Trp-CCA	118.852	0.81613	0.279755	2.91731	0.00353068	0.098393
mature-tRNA-Leu-AAG	326.05	0.905178	0.314496	2.87818	0.00399971	0.098393
RNY3-YRNA	16001.9	-0.266303	0.0999394	-2.66464	0.00770697	0.148494
hsa-let-7b	257.233	0.473701	0.181116	2.61546	0.00891067	0.148494
5S-rRNA	52222.9	-0.421714	0.166207	-2.53728	0.0111718	0.148494
mature-tRNA-Leu-TAG	184.845	0.764845	0.308261	2.48117	0.0130954	0.148494
18S-rRNA	24408.2	-0.320961	0.129441	-2.47959	0.0131535	0.148494
hsa-mir-192	204.026	-0.259495	0.104797	-2.47617	0.01328	0.148494
mature-tRNA-Pro-CGG	1945.64	0.904956	0.378487	2.39098	0.0168034	0.165031
mature-tRNA-Pro-AGG	4266.75	0.914852	0.391875	2.33455	0.019567	0.165031
mature-tRNA-Pro-TGG	3062.42	0.887021	0.385259	2.3024	0.0213125	0.165031
mature-mt_tRNA-Val-TAC	108.872	1.44151	0.627013	2.29901	0.0215042	0.165031
hsa-mir-183	120.883	-0.276609	0.122845	-2.2517	0.0243413	0.165031
mature-tRNA-Ala-CGC	284.986	1.02898	0.458668	2.24341	0.0248705	0.165031
hsa-mir-182	154.866	-0.229322	0.102572	-2.23571	0.0253705	0.165031
mature-mt_tRNA-Lys-TTT	25.4791	-0.358353	0.160419	-2.23386	0.0254925	0.165031
mature-tRNA-Cys-GCA	3394.24	1.01961	0.47028	2.1681	0.0301514	0.185431
28S-rRNA	95013.8	-0.233479	0.109522	-2.1318	0.0330233	0.193422
mature-mt_tRNA-Phe-GAA	152.456	0.732704	0.36638	1.99985	0.0455165	0.233025
hsa-mir-200c	435.019	0.36336	0.182397	1.99214	0.0463556	0.233025
mature-tRNA-Arg-TCG	100.291	0.785763	0.396272	1.98289	0.04738	0.233025
hsa-mir-10b	409.791	-0.206464	0.104418	-1.97727	0.0480109	0.233025
RNY1-YRNA	11971.8	-0.251599	0.127952	-1.96636	0.0492574	0.233025
mature-mt_tRNA-Trp-TCA	475.882	-0.468862	0.246148	-1.9048	0.0568062	0.253006
12S-rRNA	7114.07	-0.280201	0.14757	-1.89877	0.0575948	0.253006
hsa-mir-335	174.926	-0.282697	0.15313	-1.84612	0.0648747	0.275158
hsa-mir-10a	769.08	-0.203418	0.116354	-1.74826	0.0804188	0.329717
hsa-mir-203a	27.2784	-0.335984	0.195055	-1.72252	0.0849762	0.337163
hsa-mir-152	81.7181	-0.167067	0.0994287	-1.68027	0.0929056	0.357106
hsa-mir-363	243.21	0.302943	0.18453	1.6417	0.100652	0.375156
hsa-mir-125a	130.648	0.228048	0.140977	1.61762	0.105744	0.382545
mature-tRNA-Ala-TGC	260.492	0.676782	0.444341	1.52312	0.12773	0.445961
16S-rRNA	5212.38	-0.19656	0.129997	-1.51203	0.130525	0.445961
hsa-mir-28	140.834	-0.16846	0.114197	-1.47517	0.140166	0.465956
hsa-mir-151a	38.1174	-0.125648	0.0881543	-1.42532	0.154065	0.498685
hsa-mir-200b	517.67	0.253216	0.183603	1.37914	0.16785	0.499001
5.8S-rRNA	13224.9	-0.14929	0.108404	-1.37716	0.168463	0.499001
mature-mt_tRNA-Ser-TGA	3905.17	-0.277612	0.202185	-1.37306	0.169733	0.499001
mature-tRNA-Ser-GCT	101.088	0.497335	0.37044	1.34255	0.179417	0.499001
hsa-mir-30d	438.001	0.156524	0.121314	1.29023	0.196971	0.499001
RNY5-YRNA	1828.63	0.151872	0.11829	1.2839	0.199177	0.499001
hsa-mir-7-1	48.3565	-0.179856	0.140223	-1.28264	0.199618	0.499001
hsa-mir-34c	1549.24	-0.232545	0.181665	-1.28008	0.200518	0.499001
hsa-let-7a-1	89.8056	0.125423	0.0981643	1.27768	0.201362	0.499001
mature-tRNA-Tyr-GTA	13.9412	-0.646048	0.506034	-1.27669	0.201712
hsa-let-7a-3	89.8131	0.124296	0.0980429	1.26777	0.204878	0.499001
hsa-mir-20a	124.52	-0.157183	0.124705	-1.26044	0.20751	0.499001
hsa-let-7a-2	89.3665	0.122697	0.0983022	1.24816	0.211971	0.499001
hsa-mir-26a-2	88.8932	0.187083	0.151588	1.23416	0.217144	0.499001
hsa-mir-7-3	47.5692	-0.176024	0.143014	-1.23082	0.21839	0.499001
mature-mt_tRNA-Gln-TTG	25816.7	-0.45598	0.370558	-1.23052	0.218502	0.499001
45S-rRNA	536.086	-0.132267	0.107991	-1.2248	0.220649	0.499001
hsa-mir-7-2	47.45	-0.173379	0.142547	-1.21629	0.223874	0.499001
hsa-mir-26a-1	88.1245	0.184254	0.152574	1.20764	0.227188	0.499001
mature-tRNA-Lys-TTT	23146.6	0.239705	0.202172	1.18565	0.235761	0.508747
hsa-mir-660	14.3993	0.151364	0.129975	1.16456	0.244196
hsa-mir-21	1781.93	0.246286	0.221584	1.11148	0.266361	0.558852
hsa-mir-191	794.109	-0.155777	0.141184	-1.10336	0.269871	0.558852
mature-mt_tRNA-Tyr-GTA	52.5461	0.19153	0.174583	1.09707	0.272611	0.558852
mature-tRNA-Asp-GTC	3636.91	0.76431	0.711085	1.07485	0.282441	0.566776
hsa-mir-30e	576.883	0.15815	0.148133	1.06762	0.285692	0.566776
mature-mt_tRNA-Thr-TGT	1650.92	-0.899029	0.876228	-1.02602	0.304881	0.590639
mature-mt_tRNA-His-GTG	543.76	0.726213	0.711379	1.02085	0.307325	0.590639
hsa-mir-148a	380.102	0.179435	0.180378	0.994772	0.319847	0.605249
mature-tRNA-Ser-TGA	78.3236	0.3483	0.370595	0.93984	0.3473	0.636962
RNY4-YRNA	17316.1	0.141627	0.151204	0.936666	0.348931	0.636962
hsa-mir-107	79.0841	0.147626	0.160669	0.91882	0.35819	0.636962
mature-tRNA-Arg-ACG	37.8048	-0.164061	0.180883	-0.907001	0.364406	0.636962
hsa-mir-509-3	8.55009	0.209843	0.231434	0.906706	0.364563
mature-tRNA-Gln-CTG	513.372	0.500654	0.556849	0.899084	0.368608	0.636962
mature-tRNA-Leu-TAA	78.4529	0.176976	0.1973	0.896987	0.369726	0.636962
mature-tRNA-Arg-CCG	890.005	0.291234	0.327684	0.888766	0.374129	0.636962
hsa-mir-103a-2	80.1187	0.140504	0.160316	0.876423	0.3808	0.636962
hsa-mir-103a-1	80.0933	0.139906	0.160444	0.871992	0.383213	0.636962
mature-tRNA-Lys-CTT	77428.8	0.352915	0.41702	0.846279	0.397397	0.643391
mature-tRNA-Glu-TTC	67980.6	0.684658	0.80927	0.846019	0.397542	0.643391
mature-tRNA-Val-AAC	24056.7	0.490914	0.59999	0.818203	0.413242	0.65924
hsa-mir-342	68.1928	-0.121549	0.150098	-0.809801	0.418055	0.65924
mature-tRNA-Glu-CTC	28590.1	0.540015	0.675142	0.799854	0.423795	0.659833
mature-tRNA-Arg-TCT	12.2494	0.305275	0.406449	0.75108	0.452604
hsa-mir-449a	25.1967	-0.145328	0.194275	-0.748053	0.454428	0.698683
mature-mt_tRNA-Arg-TCG	1176.28	-0.281475	0.383183	-0.73457	0.462602	0.700749
mature-tRNA-Gln-TTG	557.665	0.182292	0.250711	0.727098	0.467166	0.700749
mature-tRNA-Val-CAC	30036.8	0.430739	0.601153	0.716521	0.47367	0.701944
hsa-mir-449b	22.3217	-0.128413	0.190288	-0.674832	0.499782	0.731824
mature-tRNA-Val-TAC	6843.82	0.25661	0.395579	0.648694	0.516536	0.747459
mature-tRNA-iMet-CAT	722.866	0.17006	0.268276	0.6339	0.526146	0.752511
hsa-mir-9-1	20.9398	-0.0858829	0.141431	-0.607243	0.54369
hsa-mir-9-3	20.9482	-0.0854603	0.141525	-0.603855	0.54594
mature-tRNA-Gly-GCC	326200	0.30209	0.503072	0.600492	0.548179	0.775011
hsa-mir-9-2	20.9283	-0.0830186	0.141524	-0.586603	0.55747
hsa-mir-106a	39.457	0.0654874	0.12341	0.530648	0.595663	0.818045
hsa-mir-146b	1181.93	-0.101574	0.193324	-0.52541	0.599298	0.818045
hsa-mir-19b-1	55.8477	0.0646701	0.12346	0.523815	0.600407	0.818045
hsa-mir-506	25.1654	0.113304	0.223063	0.507946	0.611492	0.818045
hsa-mir-19b-2	55.8645	0.0627235	0.123616	0.507405	0.611871	0.818045
mature-tRNA-Gly-CCC	57156.4	0.282457	0.593123	0.47622	0.633918	0.824625
mature-mt_tRNA-Asp-GTC	87.1721	0.115084	0.243294	0.473025	0.636196	0.824625
mature-mt_tRNA-Glu-TTC	28.8455	-0.190015	0.416855	-0.45583	0.648513	0.824625
mature-mt_tRNA-Leu-TAA	2278.06	0.0724217	0.165321	0.438068	0.661337	0.824625
mature-mt_tRNA-Asn-GTT	242.911	-0.178991	0.428685	-0.417536	0.676287	0.824625
hsa-mir-423	111.53	0.0596467	0.144071	0.414011	0.678866	0.824625
mature-mt_tRNA-Ala-TGC	993.916	0.175245	0.430568	0.40701	0.684001	0.824625
hsa-mir-148b	109.574	0.0474409	0.116698	0.406527	0.684356	0.824625
hsa-mir-17	40.3186	0.048641	0.119774	0.406105	0.684665	0.824625
mature-tRNA-SeC-TCA	3822.6	0.0896294	0.223418	0.401174	0.688292	0.824625
mature-mt_tRNA-Leu-TAG	896.006	-0.129972	0.326462	-0.398123	0.690539	0.824625
hsa-mir-30c-1	319.913	0.034613	0.0922538	0.375193	0.707517	0.833356
hsa-mir-30c-2	320.4	0.0341317	0.0922542	0.369974	0.711402	0.833356
mature-tRNA-Ser-AGA	146.159	0.123751	0.355374	0.348227	0.72767	0.844372
hsa-mir-31	21.0779	-0.063083	0.187193	-0.336995	0.736121
hsa-mir-99a	2618.84	0.0446206	0.136458	0.326992	0.743674	0.854877
mature-tRNA-Met-CAT	60.4325	0.0725263	0.229025	0.316674	0.751491	0.855865
mature-tRNA-Gly-TCC	655.489	-0.113566	0.392197	-0.289563	0.772151	0.86506
mature-mt_tRNA-Met-CAT	2254.17	0.169787	0.590297	0.287629	0.773631	0.86506
mature-mt_tRNA-Ser-GCT	233.989	-0.059074	0.224781	-0.262807	0.7927	0.878397
hsa-let-7g	130.089	-0.0254465	0.109174	-0.233083	0.815697	0.890077
hsa-mir-125b-1	59.4831	-0.0307017	0.134521	-0.228231	0.819467	0.890077
mature-mt_tRNA-Gly-TCC	40.9007	0.0642106	0.290305	0.221184	0.824949	0.890077
hsa-mir-92a-1	71.2384	0.0253887	0.14082	0.180292	0.856923	0.90188
hsa-mir-509-1	8.18944	0.0382663	0.229853	0.166482	0.867778
hsa-mir-509-2	8.18944	0.0382663	0.229853	0.166482	0.867778
hsa-mir-96	294.918	-0.0189773	0.116975	-0.162233	0.871122	0.90188
mature-tRNA-His-GTG	5782.74	-0.046889	0.291289	-0.160971	0.872117	0.90188
hsa-mir-125b-2	66.3318	0.0192434	0.119625	0.160864	0.8722	0.90188
hsa-mir-92a-2	70.4748	0.0229593	0.14312	0.160419	0.872551	0.90188
hsa-mir-362	17.5403	0.0132811	0.193145	0.0687624	0.945179
hsa-mir-425	114.759	-0.00542561	0.115747	-0.0468749	0.962613	0.98615
hsa-mir-30a	690.089	0.00400011	0.121156	0.0330162	0.973662	0.98615
mature-tRNA-Arg-CCT	137.514	0.00699586	0.255231	0.0274099	0.978133	0.98615
mature-mt_tRNA-Ile-GAT	25.5472	0.00353606	0.229712	0.0153934	0.987718	0.987718

## Sheet: Table S10 sRNA Hua, ITAS
	baseMean	log2FoldChange	lfcSE	stat	pvalue	padj
tRNA-Lys-CTT-1-2	14626.8	1.6416	0.281551	5.83055	5.5245e-09	7.3586e-06
tRNA-Val-AAC-6-1	491.133	1.49011	0.272969	5.45891	4.7908e-08	2.4485e-05
tRNA-Pro-AGG-2-6	1117.21	1.46991	0.272416	5.39584	6.8205e-08	2.4485e-05
tRNA-Pro-AGG-2-7	816.985	1.15311	0.21424	5.38233	7.353e-08	2.4485e-05
tRNA-Trp-CCA-3-1	20.9435	2.02381	0.396053	5.10996	3.2223e-07	8.5842e-05
tRNA-Ala-AGC-1-1	10.9721	1.50325	0.29689	5.06332	4.1201e-07	9.1466e-05
tRNA-Glu-TTC-2-1	49733	0.738872	0.148924	4.96139	6.9991e-07	0.00012611
tRNA-Pro-AGG-2-1	921.197	1.18203	0.238986	4.94603	7.5743e-07	0.00012611
5S_dup49_seq_268	33.1734	-1.35918	0.278067	-4.88795	1.0189e-06	0.0001508
tRNA-Leu-AAG-1-1	88.6988	1.42487	0.300284	4.74509	2.0842e-06	0.00027761
tRNA-Leu-AAG-1-3	67.1198	1.03129	0.226023	4.56278	5.048e-06	0.00060987
tRNA-Trp-CCA-2-1	23.8125	1.02328	0.225147	4.54497	5.4944e-06	0.00060987
tRNA-Pro-TGG-3-1	1082.1	1.17927	0.268892	4.38567	1.1563e-05	0.00118474
hsa-piR-29826	22.4268	1.02525	0.237175	4.32276	1.5409e-05	0.00141449
hsa-piR-32972	34.8217	1.0624	0.246187	4.31543	1.5929e-05	0.00141449
tRNA-Pro-AGG-2-3	245.728	1.14653	0.268875	4.26417	2.0064e-05	0.0016014
tRNA-Pro-AGG-1-1	203.629	1.00058	0.235524	4.24831	2.1539e-05	0.0016014
tRNA-Pro-AGG-2-4	258.053	1.20386	0.283444	4.24726	2.1641e-05	0.0016014
tRNA-Cys-GCA-1-1	99.3356	0.956969	0.231697	4.13027	3.6234e-05	0.00254017
tRNA-Ala-TGC-5-1	26.3384	1.05786	0.258503	4.09226	4.2718e-05	0.00284504
tRNA-Ala-AGC-11-1	28.7602	0.974581	0.245141	3.97559	7.0206e-05	0.00445307
tRNA-Pro-TGG-3-4	838.039	0.864774	0.219739	3.93546	8.3037e-05	0.00502751
tRNA-Pro-TGG-3-2	253.218	1.08551	0.277189	3.91615	8.9975e-05	0.00521072
5S_dup32_seq_1381	103.755	-0.990622	0.254746	-3.88867	0.00010079	0.00559406
tRNA-Cys-GCA-20-1	22.034	1.42227	0.367685	3.86819	0.00010965	0.00584199
tRNA-Pro-AGG-2-5	1001.35	0.938389	0.244174	3.84312	0.00012148	0.00622352
hsa-piR-32914	72.3383	-0.580474	0.156704	-3.70426	0.00021201	0.0104592
hsa-miR-192-5p	132.663	-0.630556	0.172024	-3.66552	0.00024684	0.0117425
tRNA-Leu-AAG-2-4	21.6693	1.04466	0.290257	3.5991	0.00031932	0.0146669
5S_dup4_seq_449	16.2486	-0.765483	0.213627	-3.58326	0.00033933	0.0150662
hsa-piR-28763	54.1958	1.00412	0.282469	3.55481	0.00037825	0.0160923
tRNA-His-GTG-2-1	529.108	1.19102	0.335586	3.54906	0.0003866	0.0160923
5S_dup74_seq_1000	2242.99	-0.731034	0.208109	-3.51275	0.00044349	0.0176991
tRNA-Trp-CCA-3-3	5.86798	1.44548	0.412072	3.50783	0.00045178	0.0176991
hsa-piR-33026	346.157	0.818158	0.234018	3.49613	0.00047206	0.0179651
5S_dup7_seq_12	6.16023	-0.907771	0.261424	-3.47241	0.00051582	0.0184941
tRNA-Thr-CGT-2-1	38.9449	0.936842	0.270128	3.46815	0.00052406	0.0184941
hsa-piR-14339	4.30795	1.11264	0.320984	3.46633	0.00052761	0.0184941
5S_dup1_seq_209	20.4386	-1.03188	0.299253	-3.44817	0.00056439	0.0192761
tRNA-Ala-TGC-1-1	22.6973	0.835864	0.245612	3.40318	0.00066606	0.0221797
LSU-rRNA_Hsa_dup4_seq_1367	12.2989	-0.770098	0.22798	-3.37792	0.00073036	0.0233689
tRNA-Trp-CCA-3-2	20.113	1.21438	0.359764	3.37548	0.00073686	0.0233689
hsa-piR-32974	121.749	-0.457919	0.136659	-3.35081	0.00080576	0.0249599
hsa-piR-33038	1.09176	1.99666	0.598388	3.33674	0.00084768
5S_dup12_seq_679	7.35311	-1.06048	0.319391	-3.32031	0.00089918	0.0272207
tRNA-Pro-TGG-3-3	208.273	0.718082	0.21799	3.2941	0.00098738	0.0292263
tRNA-Pro-TGG-3-5	278.24	0.912415	0.28227	3.23241	0.00122749	0.0349891
tRNA-Cys-ACA-1-1	53.3063	0.985471	0.305027	3.23076	0.0012346	0.0349891
tRNA-Arg-TCG-1-1	28.756	0.677167	0.210191	3.22167	0.00127445	0.035366
hsa-piR-7308	4.37899	0.964302	0.300534	3.20863	0.0013337	0.036255
tRNA-Pro-CGG-1-1	226.597	0.83237	0.261266	3.18591	0.00144301	0.0384417
5S_dup28_seq_170	1.53799	1.77778	0.559046	3.18004	0.00147257
hsa-piR-21768	1.5529	1.6462	0.518129	3.17721	0.001487
LSU-rRNA_Hsa_dup13_seq_762	138.258	-0.510459	0.161316	-3.16434	0.00155437	0.0401573
hsa-piR-11121	5.6367	1.0841	0.34287	3.16185	0.0015677	0.0401573
tRNA-Cys-GCA-9-2	12.9171	0.955167	0.303527	3.1469	0.00165014	0.0414102
tRNA-Cys-GCA-13-1	56.4466	1.02674	0.326793	3.14186	0.00167879	0.0414102
5S_dup26_seq_936	206.809	-0.915178	0.291917	-3.13506	0.00171818	0.0416112
LSU-rRNA_Hsa_dup3_seq_1034	22.2455	-0.483723	0.156775	-3.08546	0.00203238	0.0483415
5S_dup55_seq_977	22.2605	-0.63724	0.207286	-3.07421	0.00211058	0.0489197
tRNA-Ser-AGA-3-1	10.2069	-0.991553	0.322828	-3.07146	0.00213014	0.0489197
hsa-piR-23041	1886	0.754109	0.247243	3.05007	0.0022879	0.0509963
tRNA-Leu-AAG-2-2	77.0977	0.707708	0.232122	3.04886	0.00229713	0.0509963
LSU-rRNA_Hsa_seq_285	1.47205	-1.39452	0.459298	-3.03619	0.00239588
5S_dup10_seq_426	9.1323	0.885852	0.291781	3.03602	0.00239725	0.051853
LSU-rRNA_Hsa_dup11_seq_262	11.549	-0.641775	0.21153	-3.03397	0.00241358	0.051853
SSU-rRNA_Hsa_dup5_seq_865	70.6495	-0.587002	0.194095	-3.0243	0.0024921	0.0526902
LSU-rRNA_Hsa_dup6_seq_925	16.1538	-0.686524	0.229613	-2.98992	0.00279049	0.0580771
tRNA-Pro-CGG-1-2	208.791	0.70967	0.238161	2.97979	0.00288449	0.0591098
LSU-rRNA_Hsa_dup2_seq_842	8.65785	-0.707207	0.238205	-2.9689	0.00298872	0.0603178
5S_dup33_seq_246	2.57189	-0.93159	0.316195	-2.94625	0.00321649
5S_dup19_seq_927	1.15335	1.7451	0.603308	2.89254	0.00382136
LSU-rRNA_Hsa_dup8_seq_1442	28.6706	-0.538549	0.186484	-2.88791	0.00387805	0.077098
hsa-piR-28256	4.19925	-0.820975	0.28562	-2.87436	0.00404846	0.0793022
hsa-piR-14728	18.3376	-0.642811	0.224552	-2.86263	0.00420139	0.0811051
tRNA-Leu-AAG-3-1	23.4282	0.878088	0.30808	2.8502	0.00436918	0.0831393
5S_dup10_seq_1353	10.9214	1.07189	0.378371	2.8329	0.00461276	0.086538
5S_dup42_seq_1326	5.72281	-0.833342	0.294648	-2.82826	0.00468012	0.0865822
5S_dup48_seq_765	6.12154	-0.680446	0.241074	-2.82257	0.00476408	0.0869281
hsa-piR-1138	2.26319	1.09153	0.389899	2.79952	0.0051179
tRNA-Pro-CGG-1-3	888.739	0.65615	0.235144	2.79042	0.00526393	0.0947507
tRNA-Trp-CCA-1-1	18.8541	1.03273	0.371267	2.78163	0.00540865	0.0960577
hsa-miR-100-5p	683.849	-0.384895	0.139033	-2.76837	0.00563368	0.0985526
tRNA-Cys-GCA-22-1	12.5758	0.839615	0.303689	2.76472	0.00569711	0.0985526
LSU-rRNA_Hsa_dup6_seq_20	4.58638	-0.790232	0.288447	-2.73961	0.00615119	0.105043
hsa-miR-19a-3p	3.07601	-0.936025	0.343982	-2.72114	0.00650567
hsa-piR-24418	3.44737	0.945757	0.348152	2.71651	0.0065975
tRNA-Glu-TTC-6-1	49.9822	0.682734	0.25186	2.71076	0.00671282	0.113183
hsa-miR-320c	2.49427	1.21108	0.447962	2.70352	0.00686089
hsa-piR-30147	14.6073	0.806657	0.300153	2.68748	0.00719928	0.119296
hsa-miR-223-5p	0.781207	1.96213	0.731048	2.684	0.00727463
hsa-piR-6878	1.05966	-1.46885	0.547812	-2.68129	0.00733381
hsa-miR-200b-3p	157.833	0.661525	0.246747	2.68099	0.00734052	0.119296
tRNA-Ser-GCT-4-2	33.8457	-0.558918	0.208487	-2.68083	0.00734404	0.119296
tRNA-Pro-TGG-1-1	161.4	0.440424	0.164639	2.67508	0.0074711	0.119898
5S_dup13_seq_896	1.04823	-1.29358	0.48415	-2.67186	0.00754323
LSU-rRNA_Hsa_dup22_seq_808	175.378	-0.450391	0.169343	-2.65963	0.00782259	0.124044
tRNA-Glu-CTC-1-5	5954.63	0.467816	0.176231	2.65456	0.00794112	0.124442
LSU-rRNA_Hsa_dup14_seq_766	0.84311	-1.33698	0.506371	-2.64031	0.00828297
tRNA-Cys-GCA-6-1	1714.29	0.488782	0.185978	2.62817	0.00858462	0.132962
SSU-rRNA_Hsa	10498.8	-0.283619	0.108443	-2.61539	0.00891268	0.136456
LSU-rRNA_Hsa_dup9_seq_750	106.645	-0.49236	0.18965	-2.59615	0.00942757	0.140103
tRNA-Lys-TTT-5-1	1518.27	0.627635	0.241805	2.59562	0.00944195	0.140103
hsa-piR-7447	11.2281	0.779303	0.300526	2.59313	0.00951062	0.140103
hsa-miR-152-3p	21.0136	-0.593303	0.228992	-2.59093	0.00957162	0.140103
hsa-piR-6288	9.71645	0.522199	0.202902	2.57365	0.0100632	0.145698
hsa-piR-14137	0.61607	-1.43967	0.560415	-2.56894	0.0102009
SSU-rRNA_Hsa_seq_1300	26.7765	-0.45788	0.17854	-2.56458	0.0103299	0.147951
5S_dup10_seq_17	2.50638	1.26482	0.499271	2.53334	0.0112982
hsa-piR-5263	2.85873	-0.854116	0.337305	-2.53218	0.0113357
LSU-rRNA_Hsa_dup24_seq_1257	285.713	-0.540453	0.2135	-2.53139	0.0113611	0.160989
hsa-piR-4058	1.34249	1.30454	0.5163	2.52671	0.0115136
hsa-miR-193a-5p	0.754486	1.61687	0.640439	2.52463	0.011582
hsa-piR-28123	1.71496	-0.975525	0.386746	-2.52239	0.011656
5S_dup22_seq_853	5.39093	0.849452	0.337912	2.51382	0.0119431	0.167454
hsa-piR-4581	32.6034	-0.529888	0.212748	-2.49069	0.0127496	0.174811
5S_dup62_seq_1261	11.932	0.864681	0.347911	2.48535	0.0129424	0.174811
LSU-rRNA_Hsa_dup28_seq_114	5.36068	-0.695293	0.279849	-2.48453	0.0129722	0.174811
hsa-piR-33044	5.56637	0.644985	0.25984	2.48224	0.0130559	0.174811
hsa-piR-25110	1.94875	1.15501	0.466063	2.47823	0.0132037
hsa-piR-17442	6.06838	-0.618601	0.250245	-2.47198	0.0134365	0.174811
tRNA-Val-CAC-14-1	26.1933	0.465536	0.188486	2.46987	0.013516	0.174811
tRNA-Val-AAC-5-1	161.59	0.465733	0.188591	2.46954	0.0135285	0.174811
5S_dup2_seq_706	7.62551	-0.779048	0.315479	-2.46941	0.0135335	0.174811
hsa-piR-11167	8.55392	0.838628	0.340079	2.46598	0.0136639	0.174811
hsa-piR-12767	10.6665	-0.642655	0.260929	-2.46294	0.0137802	0.174811
tRNA-Ser-TGA-2-1	9.27192	0.732541	0.297927	2.45879	0.0139405	0.175176
hsa-piR-4775	1.24671	1.16084	0.473567	2.45127	0.0142353
hsa-piR-12255	1.53754	-0.926165	0.378294	-2.44827	0.0143544
hsa-piR-1510	4.68267	0.686911	0.281161	2.44313	0.0145606	0.181259
hsa-piR-24626	2.49729	0.851029	0.348522	2.44182	0.0146133
5S_dup6_seq_282	10.3234	-0.808157	0.331561	-2.43743	0.0147919	0.182434
5S_dup98_seq_828	11.7838	-0.596826	0.245251	-2.43353	0.0149524	0.182721
hsa-piR-14080	1.12459	1.32512	0.547162	2.4218	0.0154437
hsa-piR-24845	0.768551	-1.25806	0.519738	-2.42057	0.0154963
hsa-piR-1965	4.13367	0.957402	0.396093	2.41711	0.0156441	0.18819
hsa-piR-21516	8.26962	0.688218	0.284832	2.41622	0.0156825	0.18819
hsa-piR-17772	1.51723	1.04976	0.435757	2.40905	0.0159943
hsa-piR-32898	2.45592	0.922855	0.383815	2.40443	0.0161978
hsa-piR-28675	2.63026	-0.701463	0.292206	-2.40058	0.0163693
tRNA-Ile-AAT-3-1	3.73476	0.749394	0.31299	2.39431	0.0166519
hsa-miR-149-5p	2.78127	1.06237	0.443789	2.39387	0.0166716
hsa-piR-18928	2.49697	0.927549	0.39267	2.36216	0.0181689
hsa-piR-7631	1.63536	-0.909595	0.385927	-2.35691	0.0184277
hsa-piR-11109	1.25734	1.16525	0.494632	2.3558	0.0184827
hsa-piR-32829	6.95397	-0.624907	0.265763	-2.35136	0.0187047	0.221783
hsa-miR-320b	19.1087	0.611779	0.260423	2.34918	0.0188149	0.221783
hsa-piR-9967	3.04821	-0.625842	0.266429	-2.349	0.0188237
hsa-piR-13591	0.776849	1.52622	0.650731	2.34539	0.0190073
5S_dup3_seq_488	0.673937	-1.40388	0.598798	-2.34451	0.0190523
tRNA-Pro-AGG-2-2	275.017	0.67084	0.288898	2.32207	0.0202293	0.236364
tRNA-Tyr-GTA-11-1	1.50085	0.961436	0.414088	2.32181	0.020243
hsa-piR-21275	70.3002	-0.420419	0.181413	-2.31747	0.020478	0.236409
tRNA-Ala-TGC-8-1	21.6628	0.659913	0.285004	2.31545	0.0205882	0.236409
hsa-piR-24376	1.85797	1.01338	0.437873	2.31433	0.0206497
5S_dup5_seq_1350	0.51224	-1.72938	0.748135	-2.31159	0.0208004
hsa-piR-28846	2.91909	-0.698642	0.303981	-2.29831	0.0215441
hsa-piR-10357	1.4135	-0.963279	0.42027	-2.29205	0.021903
LSU-rRNA_Hsa_dup11_seq_51	1772.03	-0.293981	0.128372	-2.29007	0.022017	0.250655
hsa-piR-2034	1.84288	-0.959085	0.418881	-2.28964	0.0220424
5S_dup61_seq_551	4.56464	-0.663526	0.290301	-2.28564	0.0222751	0.251444
hsa-piR-26536	0.798823	-1.33048	0.583895	-2.27863	0.0226891
LSU-rRNA_Hsa_dup8_seq_743	1.2753	-0.998425	0.438633	-2.27622	0.0228328
hsa-piR-18912	0.564493	-1.33767	0.588047	-2.27477	0.0229197
hsa-piR-19613	0.9468	1.30323	0.575204	2.26567	0.0234713
tRNA-Glu-TTC-10-1	60.5083	0.523032	0.230938	2.26482	0.0235239	0.263309
hsa-piR-5152	3.01707	0.693302	0.308034	2.25073	0.0244024
hsa-piR-20906	1.73891	-0.865313	0.386197	-2.2406	0.0250522
hsa-piR-12614	0.702939	-1.15555	0.515749	-2.24053	0.0250565
hsa-piR-9116	1.99573	-0.87376	0.392061	-2.22863	0.0258383
hsa-piR-2839	2.01892	0.853103	0.383157	2.22651	0.0259799
hsa-miR-340-3p	0.578009	1.51517	0.684439	2.21373	0.0268471
LSU-rRNA_Hsa_dup6_seq_589	26.1679	-0.443458	0.200365	-2.21325	0.0268807	0.296614
hsa-piR-15343	0.993483	-1.11994	0.506278	-2.21211	0.0269588
hsa-piR-32984	742.018	-0.367844	0.166318	-2.21169	0.0269881	0.296614
LSU-rRNA_Hsa_dup2_seq_1030	112.617	-0.333304	0.150878	-2.20911	0.0271673	0.296614
tRNA-Lys-CTT-6-1	236.375	0.376969	0.171791	2.19435	0.0282105	0.305499
hsa-piR-7908	1.97654	-0.999952	0.458159	-2.18255	0.0290693
tRNA-Val-TAC-1-2	3410.46	0.306252	0.140608	2.17805	0.0294023	0.313647
hsa-piR-11072	6.79327	-0.569302	0.261432	-2.17763	0.0294338	0.313647
hsa-piR-22265	3.50242	-0.629901	0.2899	-2.17282	0.029794
hsa-piR-13527	1.05268	-1.08436	0.499614	-2.1704	0.0299765
tRNA-Lys-TTT-3-2	6338.68	0.47096	0.220148	2.13929	0.0324122	0.339171
5S_dup1_seq_362	4.73228	-0.505617	0.236582	-2.13717	0.0325838	0.339171
hsa-miR-200c-3p	507.171	0.434475	0.203381	2.13626	0.0326583	0.339171
5S_dup19_seq_1365	1.34067	-0.866214	0.405546	-2.13592	0.0326859
LSU-rRNA_Hsa_dup6_seq_169	263.491	-0.438019	0.205263	-2.13394	0.0328477	0.339171
hsa-piR-9276	1.52717	-0.765002	0.359115	-2.13024	0.0331514
hsa-piR-28994	13.3379	-0.537049	0.252252	-2.12902	0.0332527	0.340713
hsa-piR-15892	0.74929	1.26483	0.60002	2.10799	0.0350322
LSU-rRNA_Hsa_dup26_seq_97	6.44706	-0.489268	0.232779	-2.10186	0.0355657	0.360804
hsa-piR-11551	16.4428	-0.455825	0.217091	-2.0997	0.0357553	0.360804
LSU-rRNA_Hsa_dup11_seq_685	2.39195	-1.02462	0.488366	-2.09806	0.0358998
hsa-piR-16512	1.15784	-0.820942	0.391743	-2.09561	0.0361166
hsa-piR-15320	1.20859	-0.92245	0.441679	-2.08851	0.0367521
hsa-piR-17436	0.399454	-1.46342	0.702351	-2.0836	0.0371963
hsa-piR-16335	0.80635	-1.15323	0.555382	-2.07646	0.0378515
hsa-piR-33164	1.52519	1.01457	0.489638	2.07208	0.0382576
tRNA-Thr-CGT-6-1	0.946825	1.06958	0.516899	2.06923	0.0385247
hsa-piR-8677	2.17544	-0.641787	0.310436	-2.06737	0.0386993
hsa-piR-30322	0.444959	-1.34183	0.649822	-2.06492	0.0389308
hsa-piR-17662	3.60855	-0.669633	0.325415	-2.05778	0.0396113
hsa-piR-11536	5.01006	-0.548045	0.266539	-2.05615	0.0397681	0.397787
hsa-piR-30098	0.470895	-1.38568	0.673949	-2.05606	0.0397764
tRX-Lys-NNN-3-1	24.294	0.60291	0.293742	2.05252	0.0401193	0.397787
hsa-miR-27b-3p	2.82123	-0.571204	0.278338	-2.05219	0.0401512
hsa-piR-25148	3.37548	-0.628472	0.306385	-2.05125	0.0402429
tRX-Val-NNN-4-1	52.3455	-0.523897	0.255498	-2.05049	0.0403162	0.397787
hsa-piR-12034	0.462455	1.36536	0.666196	2.04949	0.0404141
tRNA-Ser-GCT-6-1	1.43855	0.809796	0.395795	2.046	0.0407568
hsa-piR-20857	2.73421	0.675156	0.329993	2.04597	0.0407593
hsa-piR-14445	0.753398	-1.07066	0.525667	-2.03676	0.0416739
hsa-piR-19504	1.81196	-0.793748	0.391617	-2.02685	0.0426778
hsa-piR-7289	1.78683	-0.81619	0.404522	-2.01767	0.043626
hsa-piR-33092	17.1987	-0.45218	0.224289	-2.01606	0.0437937	0.42175
hsa-piR-25077	0.472397	-1.39411	0.691787	-2.01523	0.0438801
hsa-miR-516a-5p	40.0202	-0.363508	0.180463	-2.0143	0.0439777	0.42175
LSU-rRNA_Hsa_dup10_seq_1212	9.37864	-0.375441	0.186457	-2.01356	0.044056	0.42175
hsa-piR-14757	0.638575	1.29796	0.644668	2.01338	0.0440748
LSU-rRNA_Hsa_dup9_seq_1305	0.403839	-1.33662	0.665209	-2.00932	0.0445028
5S_dup16_seq_899	1.45005	-1.00899	0.502225	-2.00904	0.0445327
5S_dup36_seq_751	5.43249	-0.598019	0.297931	-2.00724	0.0447244	0.42175
hsa-piR-13023	2.57742	-0.68629	0.341939	-2.00705	0.044744
5S_dup64_seq_556	165.587	-0.562959	0.280674	-2.00574	0.0448836	0.42175
hsa-piR-28162	9.79802	0.56411	0.282003	2.00036	0.0454609	0.42175
LSU-rRNA_Hsa_dup18_seq_979	0.702816	-1.08554	0.542897	-1.99954	0.0455504
5S_dup50_seq_69	2.67645	0.965471	0.483015	1.99884	0.0456255
5S_dup75_seq_568	15.2941	-0.444349	0.222446	-1.99755	0.045765	0.42175
LSU-rRNA_Hsa_dup8_seq_1045	29.9507	-0.480328	0.240641	-1.99604	0.0459297	0.42175
tRNA-Asp-GTC-3-1	560.199	-0.308827	0.154734	-1.99586	0.0459488	0.42175
tRNA-Gly-CCC-2-1	438.265	0.249955	0.125325	1.99444	0.0461036	0.42175
tRNA-Glu-CTC-1-2	6741.41	0.394479	0.197902	1.99331	0.0462278	0.42175
hsa-piR-14958	0.877483	1.21675	0.610552	1.99287	0.0462759
hsa-piR-23639	3.41796	-0.631077	0.316753	-1.99233	0.0463349
tRNA-Phe-GAA-1-4	13.3389	-0.516427	0.260146	-1.98514	0.047129	0.427046
hsa-piR-6527	2.04102	0.802937	0.405036	1.98238	0.0474364
hsa-piR-12125	0.98758	-0.884315	0.447041	-1.97815	0.0479114
hsa-piR-26749	1.45593	0.925056	0.468314	1.97529	0.0482355
LSU-rRNA_Hsa_dup12_seq_1053	7.90234	-0.412181	0.208778	-1.97426	0.0483526	0.435174
hsa-piR-16680	0.564202	-1.06173	0.539331	-1.9686	0.048999
hsa-piR-1999	1.08729	1.0558	0.536974	1.9662	0.0492755
hsa-piR-2622	0.982696	-1.02756	0.523294	-1.96363	0.0495729
hsa-piR-23213	0.629355	1.44032	0.735687	1.9578	0.050254
5S_dup5_seq_835	5.43303	0.753387	0.385201	1.95583	0.0504854	0.448647
5S_dup42_seq_191	100.381	0.539617	0.275948	1.95551	0.0505234	0.448647
hsa-miR-8061	0.802045	1.15429	0.592659	1.94764	0.0514582
5S_dup81_seq_575	0.760995	-1.203	0.617871	-1.947	0.0515343
hsa-piR-18607	13.8394	-0.446305	0.229348	-1.94597	0.0516581	0.455686
hsa-piR-15492	0.512944	1.29896	0.66853	1.94301	0.0520153
tRNA-Cys-GCA-15-1	14.3605	0.635801	0.327662	1.94042	0.052329	0.456026
hsa-piR-13726	3.91404	-1.11886	0.576737	-1.93999	0.0523813	0.456026
5S_dup37_seq_1229	3.10716	-0.670884	0.347049	-1.93311	0.0532227
hsa-piR-17623	4.25715	-0.534974	0.277732	-1.92623	0.0540761	0.467723
hsa-piR-20807	2.01197	-0.709798	0.369873	-1.91903	0.0549802
hsa-piR-17858	2.61295	0.674564	0.351969	1.91654	0.0552958
hsa-piR-10963	0.783324	-0.984316	0.513689	-1.91617	0.0553432
hsa-piR-2055	9.11611	-0.468889	0.245014	-1.91373	0.055655	0.470283
5S_dup98_seq_123	7.58588	0.633185	0.331321	1.91109	0.0559929	0.470283
tRNA-His-GTG-1-5	257.51	0.483378	0.252934	1.91108	0.0559942	0.470283
hsa-piR-22882	13.4952	-0.480522	0.251464	-1.91089	0.0560184	0.470283
tRNA-Ser-GCT-5-1	7.20219	-0.598274	0.313598	-1.90777	0.056421	0.470283
tRNA-Ser-CGA-4-1	11.3603	0.403013	0.211308	1.90723	0.0564905	0.470283
hsa-piR-7709	3.70239	0.652147	0.342555	1.90377	0.0569398
hsa-piR-7474	0.438351	-1.65304	0.870707	-1.89851	0.0576295
hsa-piR-32993	76.8981	-0.316785	0.166873	-1.89836	0.057649	0.476947
5S_dup62_seq_1415	1.37673	1.25893	0.663692	1.89685	0.0578475
hsa-miR-505-3p	1.02418	1.0436	0.550252	1.89658	0.0578828
tRX-Phe-NNN-1-1	3.81441	0.766486	0.404823	1.89338	0.0583068
hsa-piR-30402	0.667819	-1.10613	0.585303	-1.88984	0.0587797
hsa-piR-23896	6.06447	0.488419	0.258712	1.88789	0.0590413	0.484457
hsa-miR-874-3p	4.94331	-0.569517	0.301958	-1.88608	0.0592842	0.484457
hsa-piR-10649	3.79516	0.601177	0.318925	1.88501	0.0594283
hsa-piR-33019	203.417	0.380712	0.20259	1.87922	0.060214	0.489055
hsa-piR-12455	0.966988	1.08167	0.576169	1.87734	0.0604712
5S_dup12_seq_373	1.27007	-0.881908	0.469932	-1.87667	0.0605633
hsa-let-7d-5p	12.9469	0.462191	0.246807	1.87268	0.0611128	0.490915
hsa-piR-144	25.7815	-0.456733	0.243957	-1.87219	0.0611802	0.490915
hsa-miR-140-3p	49.762	0.338769	0.181593	1.86554	0.0621057	0.495358
5S_dup60_seq_1413	0.391408	-1.40064	0.751913	-1.86277	0.0624951
hsa-piR-22074	2.49899	0.754395	0.405253	1.86154	0.0626682
SSU-rRNA_Hsa_dup4_seq_858	603.09	-0.241774	0.130143	-1.85775	0.063204	0.501117
hsa-piR-12268	0.482313	1.30202	0.701888	1.85502	0.0635929
hsa-piR-10301	25.0542	-0.385316	0.208	-1.85248	0.0639566	0.50157
hsa-piR-15278	0.597703	1.08724	0.586983	1.85224	0.0639911
tRNA-Arg-ACG-2-2	6.65074	-0.38842	0.209721	-1.85208	0.0640142	0.50157
hsa-piR-29269	2.01578	-0.651988	0.352392	-1.85018	0.0642878
hsa-piR-4631	0.829722	-0.929119	0.502313	-1.84968	0.0643593
hsa-piR-27306	6302.94	0.38623	0.208846	1.84935	0.0644071	0.501698
hsa-piR-24689	0.73363	-0.99656	0.540178	-1.84487	0.065056
LSU-rRNA_Hsa_dup16_seq_690	5.69323	-0.469462	0.254996	-1.84106	0.065613	0.508119
hsa-piR-4245	3.14437	-0.59487	0.323152	-1.84084	0.0656456
hsa-piR-22462	1.08167	-0.878258	0.477513	-1.83924	0.0658806
hsa-piR-25890	5.21261	0.484817	0.263965	1.83667	0.0662582	0.51015
hsa-piR-9536	1.27343	-0.800496	0.43593	-1.83629	0.0663141
hsa-piR-19458	0.971513	0.918818	0.500649	1.83525	0.0664683
hsa-piR-20832	4.03169	-0.539487	0.29442	-1.83237	0.0668964	0.510193
5S_dup52_seq_970	302.683	-0.420559	0.229629	-1.83147	0.0670299	0.510193
hsa-piR-26704	1.39831	-0.920102	0.503512	-1.82737	0.0676447
hsa-piR-27809	0.909608	-0.861634	0.472277	-1.82443	0.0680877
LSU-rRNA_Hsa_dup14_seq_321	12.5928	-0.4162	0.228247	-1.82346	0.0682336	0.516404
hsa-piR-3917	9.00384	-0.522763	0.287259	-1.81983	0.0687843	0.517391
hsa-miR-502-3p	1.23266	0.933636	0.51346	1.81832	0.0690147
hsa-piR-1814	0.877487	-0.878281	0.48305	-1.8182	0.0690335
hsa-piR-6174	1.78647	0.717004	0.39455	1.81727	0.0691761
hsa-piR-25489	0.675772	-1.00348	0.552925	-1.81485	0.0695472
LSU-rRNA_Hsa_dup13_seq_58	232.656	-0.251936	0.138822	-1.81481	0.0695528	0.517391
hsa-piR-11421	7.40474	0.498709	0.274857	1.81443	0.0696112	0.517391
hsa-piR-26525	1.52965	0.845212	0.466499	1.81182	0.0700142
hsa-piR-12588	1.54717	-0.746039	0.412366	-1.80917	0.0704247
LSU-rRNA_Hsa_dup17_seq_326	14.0217	-0.47263	0.261272	-1.80896	0.0704573	0.517391
tRNA-Leu-AAG-1-2	22.701	0.568861	0.314503	1.80876	0.0704879	0.517391
hsa-miR-10b-5p	117.951	-0.329619	0.182369	-1.80743	0.0706946	0.517391
hsa-piR-25657	0.96722	-0.917078	0.508099	-1.80492	0.0710871
hsa-piR-15358	0.613298	-1.03594	0.574025	-1.80469	0.0711231
hsa-piR-9722	1.12268	0.895793	0.496459	1.80436	0.0711744
5S_dup38_seq_951	0.873531	0.954804	0.530822	1.79873	0.0720621
hsa-piR-10152	75.9473	-0.354728	0.19731	-1.79782	0.0722057	0.525563
LSU-rRNA_Hsa_dup15_seq_1315	6.05538	-0.519429	0.290721	-1.78669	0.073987	0.535602
hsa-piR-28610	3.06669	0.525367	0.295405	1.77846	0.0753276
hsa-piR-24318	12.2362	-0.425712	0.239479	-1.77766	0.0754594	0.540571
hsa-piR-33008	4.67429	0.461651	0.259917	1.77614	0.0757093	0.540571
hsa-piR-825	2.93711	-0.621346	0.349931	-1.77562	0.0757949
hsa-piR-17847	432.198	-0.342778	0.19311	-1.77504	0.0758909	0.540571
hsa-miR-374a-5p	1.65253	-0.818532	0.461789	-1.77252	0.0763079
5S_dup24_seq_35	15.0441	0.410662	0.231756	1.77196	0.0764015	0.541313
5S_dup63_seq_1560	1.77263	1.15129	0.649802	1.77175	0.0764361
hsa-piR-29246	1.99328	0.681727	0.385202	1.76979	0.0767619
tRNA-Cys-GCA-19-1	50.2973	0.547935	0.309766	1.76887	0.076916	0.542074
hsa-piR-27548	2.25457	-0.696796	0.394118	-1.76799	0.077063
tRNA-Asn-GTT-11-2	2.90408	-0.677386	0.3835	-1.76632	0.0773416
hsa-piR-29328	0.67585	-1.05387	0.597278	-1.76446	0.0776549
LSU-rRNA_Hsa_dup24_seq_88	9.12712	-0.481871	0.273861	-1.75955	0.078484	0.546045
hsa-piR-9935	0.537882	1.15182	0.654884	1.75882	0.0786081
tRNA-Ser-AGA-2-5	22.2439	-0.480968	0.273589	-1.75799	0.0787486	0.546045
hsa-piR-26022	0.984149	0.871714	0.49599	1.75752	0.0788285
hsa-piR-27703	7.40711	-0.423293	0.240907	-1.75708	0.0789045	0.546045
LSU-rRNA_Hsa_dup19_seq_1238	84.533	-0.284126	0.16182	-1.75582	0.0791192	0.546045
hsa-piR-6136	1.87284	-0.682316	0.38865	-1.7556	0.079156
hsa-piR-13438	0.397644	-1.36665	0.778505	-1.75549	0.0791761
5S_dup3_seq_1174	0.592415	-1.51446	0.86547	-1.74987	0.0801406
5S_dup20_seq_299	2.13106	0.707316	0.404332	1.74934	0.0802316
5S_dup56_seq_1249	0.598887	-1.4309	0.818485	-1.74823	0.0804239
hsa-piR-30303	1.09688	-0.808888	0.46387	-1.74378	0.0811971
5S_dup2_seq_444	4.18956	0.797274	0.457228	1.74371	0.0812095	0.557352
hsa-piR-19399	0.709032	1.02305	0.586788	1.74347	0.0812508
LSU-rRNA_Hsa_dup10_seq_684	35.4192	-0.318834	0.183079	-1.74151	0.0815943	0.557352
hsa-piR-29062	2.6295	-0.558661	0.321011	-1.74032	0.0818033
5S_dup93_seq_821	0.797045	-0.907582	0.522151	-1.73816	0.0821825
hsa-piR-7788	6.28598	0.465692	0.268132	1.73681	0.0824214	0.560129
LSU-rRNA_Hsa_dup19_seq_697	1.18328	-0.925431	0.533244	-1.73547	0.0826568
hsa-piR-19448	1.05445	-0.777991	0.448749	-1.73369	0.0829732
hsa-piR-17563	0.475048	-1.32302	0.764191	-1.73127	0.0834035
hsa-piR-12376	5.62229	-0.407355	0.235344	-1.73089	0.0834712	0.563411
5S_dup26_seq_441	79.2013	0.452637	0.261742	1.72933	0.0837503	0.563411
hsa-piR-8906	1.12638	-0.856046	0.495042	-1.72924	0.0837665
hsa-piR-31438	4.13079	0.557041	0.323314	1.72291	0.0849045	0.568306
5S_dup54_seq_1548	2.95617	-0.579406	0.336569	-1.72151	0.0851589
hsa-piR-20924	0.321406	-1.44741	0.842408	-1.71818	0.0857633
5S_dup8_seq_640	0.34756	1.18751	0.69176	1.71665	0.0860425
hsa-piR-26319	0.383397	-1.4655	0.853889	-1.71626	0.0861142
hsa-miR-506-3p	7.48552	0.675421	0.394191	1.71344	0.0866324	0.575126
tRNA-Val-CAC-8-1	71.2732	-0.51564	0.301087	-1.7126	0.0867871	0.575126
tRNA-Ala-AGC-12-2	0.668291	1.14556	0.669167	1.71192	0.0869113
hsa-piR-2743	1.88856	0.728194	0.425863	1.70992	0.0872799
hsa-piR-21184	0.379499	-1.45489	0.852204	-1.70721	0.0877822
hsa-piR-5992	4.59332	-0.523985	0.307076	-1.70637	0.0879391	0.579876
hsa-piR-4583	1.738	0.746555	0.438374	1.70301	0.0885663
5S_dup24_seq_235	1.61599	0.718316	0.422192	1.7014	0.0888684
hsa-piR-16981	1.59575	-0.770358	0.452811	-1.70128	0.0888905
hsa-piR-13165	4.97602	0.471439	0.277365	1.6997	0.0891866	0.58148
hsa-piR-27924	3.9622	-0.529983	0.311891	-1.69926	0.0892707	0.58148
hsa-piR-6960	227.754	0.439706	0.259004	1.69768	0.0895677	0.58148
hsa-piR-13086	0.838668	-0.87127	0.513338	-1.69726	0.0896472
hsa-piR-33170	3.83525	0.666535	0.393103	1.69557	0.0899666
hsa-piR-3333	5.2214	0.559174	0.330433	1.69225	0.0905993	0.58148
hsa-piR-32873	5.70176	-0.615408	0.363681	-1.69217	0.0906143	0.58148
hsa-miR-92b-3p	1.10389	-0.716129	0.423663	-1.69032	0.0909658
hsa-piR-24591	1.61212	0.783388	0.463812	1.68902	0.0912158
hsa-piR-12132	0.993976	0.836383	0.495283	1.6887	0.0912777
hsa-piR-9137	2.06966	0.682701	0.404602	1.68734	0.0915383
hsa-piR-26352	0.797624	-0.984496	0.583844	-1.68623	0.0917517
hsa-piR-32575	15.7836	-0.458577	0.272052	-1.68562	0.0918688	0.58148
hsa-piR-5638	5.14908	-0.46716	0.27743	-1.68388	0.0922039	0.58148
tRNA-Glu-TTC-10-2	22.6972	0.463958	0.27555	1.68375	0.0922297	0.58148
hsa-miR-522-5p	0.570462	-1.20877	0.717925	-1.6837	0.09224
5S_dup41_seq_1532	10.4739	-0.619573	0.368194	-1.68274	0.0924264	0.58148
hsa-piR-4579	2.91818	-0.563348	0.334849	-1.6824	0.0924921
hsa-piR-32908	0.875422	-0.806028	0.479369	-1.68144	0.0926783
hsa-piR-6186	32.5302	-0.336094	0.199956	-1.68084	0.0927936	0.58148
hsa-piR-5841	2.7162	0.592727	0.352783	1.68015	0.0929288
hsa-piR-1464	0.529542	-1.10975	0.661349	-1.67801	0.0933449
hsa-miR-10a-5p	633.449	-0.22576	0.134808	-1.67469	0.0939957	0.58148
5S_dup62_seq_358	2.22479	-0.652913	0.39008	-1.67379	0.0941714
hsa-piR-32837	65.7196	-0.258467	0.154431	-1.67368	0.0941942	0.58148
hsa-piR-24874	0.977818	-0.698357	0.417574	-1.67241	0.0944427
hsa-piR-3430	19.7328	-0.421866	0.252351	-1.67174	0.0945746	0.58148
hsa-piR-22362	17.0042	-0.428125	0.256222	-1.67091	0.0947386	0.58148
hsa-piR-2527	9.14104	-0.421203	0.252219	-1.66999	0.0949217	0.58148
hsa-piR-13097	5.04921	0.515576	0.30896	1.66875	0.0951672	0.58148
tRNA-Asp-GTC-2-4	619.883	-0.246715	0.148514	-1.66123	0.0966679	0.587953
hsa-piR-16086	0.830039	-0.947206	0.570188	-1.66122	0.0966699
hsa-piR-20012	2.22242	0.676799	0.407843	1.65946	0.0970232
5S_dup45_seq_1329	6.8531	-0.406914	0.245616	-1.65671	0.097579	0.590797
hsa-piR-28957	5.21749	-0.462094	0.279411	-1.65381	0.0981653	0.591657
hsa-piR-28712	0.763682	-0.857931	0.520511	-1.64825	0.0993015
hsa-piR-2136	0.951077	-0.850236	0.516489	-1.64619	0.0997255
hsa-piR-7851	6.07362	0.400595	0.243414	1.64573	0.099819	0.596387
hsa-piR-22269	4.61973	0.491088	0.298425	1.6456	0.0998456	0.596387
hsa-piR-20436	1.3308	0.72426	0.440784	1.64312	0.100359
hsa-piR-3361	0.99942	-0.783491	0.477253	-1.64167	0.100659
5S_dup65_seq_89	1.01648	0.947135	0.578469	1.63731	0.101565
hsa-piR-28832	1.07513	-0.764956	0.467935	-1.63475	0.102102
5S_dup6_seq_145	0.567228	-0.879666	0.53966	-1.63004	0.103094
hsa-piR-31826	0.899658	0.997971	0.612928	1.6282	0.103482
hsa-piR-13243	0.949076	-0.786786	0.484418	-1.62419	0.104336
hsa-miR-582-5p	4.23	0.762351	0.469709	1.62303	0.104583	0.621897
hsa-piR-16917	0.693622	1.0368	0.639534	1.62117	0.10498
hsa-piR-560	0.258426	-1.3369	0.824811	-1.62086	0.105048
5S_dup44_seq_1395	12.5856	-0.344906	0.21336	-1.61654	0.105978	0.627387
hsa-piR-14720	0.6436	-1.06948	0.661908	-1.61576	0.106147
hsa-piR-29500	0.695684	-0.850594	0.52711	-1.61369	0.106594
hsa-miR-155-5p	57.4556	0.426051	0.264115	1.61313	0.106717	0.628969
hsa-piR-31077	2.76828	0.507817	0.315527	1.60942	0.107524
tRNA-Ser-TGA-4-1	30.4607	0.386091	0.240247	1.60706	0.108041	0.631038
hsa-piR-11405	2.21032	0.654312	0.40739	1.60611	0.10825
5S_dup1_seq_1485	0.715371	-0.747564	0.465586	-1.60564	0.108353
5S_dup19_seq_158	0.857741	-0.747355	0.465546	-1.60533	0.108421
hsa-miR-508-3p	2.52109	0.725368	0.451881	1.60522	0.108446
tRNA-Glu-TTC-13-1	8.90537	-0.47572	0.296688	-1.60344	0.108839	0.631038
hsa-miR-21-5p	211.805	0.491409	0.306619	1.60267	0.109008	0.631038
tRNA-Val-TAC-2-1	1001.43	0.2633	0.164308	1.60248	0.10905	0.631038
5S_dup48_seq_1138	0.898366	-0.862996	0.538887	-1.60144	0.109279
hsa-piR-33175	1.8271	0.983129	0.613912	1.60142	0.109284
5S_dup21_seq_1108	4.77284	0.645898	0.403897	1.59916	0.109784	0.631038
hsa-piR-17930	0.227048	-1.76512	1.1041	-1.5987	0.109888
hsa-piR-4275	37.141	-0.362119	0.226523	-1.5986	0.10991	0.631038
hsa-piR-26108	3.56764	-0.453397	0.283623	-1.59859	0.109911
hsa-piR-27858	2.67044	-0.567366	0.355704	-1.59505	0.110701
hsa-piR-13092	0.656249	-0.854675	0.536227	-1.59387	0.110966
hsa-piR-23722	0.641772	-0.883549	0.554564	-1.59323	0.111108
hsa-piR-29149	2.39386	-0.594663	0.373492	-1.59217	0.111346
5S_dup48_seq_1541	0.78434	-0.762782	0.479782	-1.58985	0.111868
hsa-piR-3108	2.07879	-0.570324	0.358754	-1.58974	0.111894
hsa-piR-24221	3.57225	-0.531761	0.334545	-1.58951	0.111946
hsa-piR-26898	0.506218	-1.0042	0.633065	-1.58625	0.112682
hsa-piR-21409	28.0937	-0.338248	0.213249	-1.58616	0.112703	0.64282
hsa-piR-4055	1.20726	-0.670992	0.423283	-1.58521	0.112919
hsa-piR-33028	33.7799	0.467637	0.295169	1.5843	0.113124	0.64282
hsa-piR-14639	5.17684	0.40634	0.256682	1.58305	0.11341	0.64282
hsa-piR-29152	2.75989	-0.558107	0.352807	-1.5819	0.113672
hsa-piR-24701	3.51554	-0.468631	0.29628	-1.58171	0.113715
hsa-piR-30350	0.717788	1.10016	0.696847	1.57876	0.114391
hsa-piR-33005	24.1826	0.428982	0.272093	1.5766	0.114888	0.645548
hsa-piR-24314	2.02696	0.742734	0.471639	1.57479	0.115305
hsa-piR-6516	0.856313	0.959843	0.610164	1.57309	0.115698
hsa-piR-22170	0.897152	-0.804449	0.511385	-1.57308	0.115701
hsa-miR-34c-5p	149.36	0.451431	0.28705	1.57265	0.115799	0.645548
LSU-rRNA_Hsa_dup1_seq_879	8.04097	-0.358018	0.227765	-1.57187	0.115981	0.645548
hsa-piR-17588	7.37426	-0.409916	0.260878	-1.57129	0.116115	0.645548
hsa-piR-32070	32.5304	-0.333909	0.212623	-1.57043	0.116315	0.645548
hsa-miR-16-2-3p	3.02043	0.699328	0.445523	1.56968	0.11649
hsa-piR-10776	1.15612	-0.683341	0.436119	-1.56687	0.117146
5S_dup30_seq_44	3.82379	-0.573202	0.366251	-1.56505	0.117571
tRX-Phe-NNN-2-1	6.47	0.465746	0.298126	1.56225	0.11823	0.651276
hsa-piR-15181	4.09349	0.45979	0.294389	1.56184	0.118325	0.651276
hsa-piR-14124	1.6187	-0.563502	0.360808	-1.56178	0.118341
hsa-miR-15b-5p	0.638691	-1.10168	0.706536	-1.55926	0.118934
5S_seq_577	4.95006	-0.450967	0.289445	-1.55804	0.119224	0.651371
hsa-piR-19569	2.5816	0.536519	0.344394	1.55786	0.119266
hsa-piR-6443	7.91713	0.395294	0.253778	1.55763	0.11932	0.651371
hsa-piR-7606	0.479065	-0.949184	0.610752	-1.55412	0.120155
hsa-piR-1267	0.456564	1.09248	0.703599	1.5527	0.120494
hsa-piR-17420	14.5998	-0.456031	0.29434	-1.54933	0.121302	0.659209
hsa-piR-19575	0.579683	-0.928436	0.59976	-1.54801	0.12162
hsa-let-7g-5p	38.201	-0.354818	0.229464	-1.54629	0.122034	0.659209
5S_dup19_seq_604	114.162	0.451688	0.292272	1.54544	0.122241	0.659209
5S_dup48_seq_1332	0.546637	-0.826635	0.535768	-1.5429	0.122856
hsa-piR-30390	0.837274	0.971531	0.629837	1.54251	0.12295
hsa-miR-128-3p	2.36752	-0.484665	0.314547	-1.54084	0.123357
hsa-piR-610	0.732577	0.916235	0.59556	1.53844	0.12394
hsa-miR-146a-5p	24.0936	-0.521738	0.339256	-1.53789	0.124076	0.662625
hsa-piR-18581	1.28704	-0.702155	0.457107	-1.53608	0.124518
hsa-piR-32950	0.854112	-0.942633	0.614041	-1.53513	0.124752
hsa-piR-3856	6.97356	0.443996	0.289294	1.53476	0.124843	0.662625
hsa-piR-2211	2.83752	-0.497813	0.32473	-1.53301	0.125274
hsa-piR-21266	0.314766	-1.35598	0.885516	-1.53129	0.125699
hsa-piR-24739	17.6525	-0.334602	0.21857	-1.53087	0.125801	0.662625
hsa-piR-17251	27.1323	0.339537	0.221916	1.53002	0.126011	0.662625
hsa-piR-5047	7.78723	-0.359482	0.2355	-1.52646	0.126894	0.662625
hsa-miR-185-5p	2.6549	-0.670102	0.439271	-1.52549	0.127137
hsa-piR-4709	0.804676	-0.810579	0.531358	-1.52549	0.127138
hsa-piR-27370	12.5228	0.331832	0.217613	1.52487	0.127291	0.662625
hsa-piR-26191	7.93021	-0.408526	0.267989	-1.52441	0.127405	0.662625
5S_dup54_seq_1246	2.33997	-0.522944	0.343076	-1.52428	0.127439
hsa-piR-32406	3.32339	-0.433163	0.284241	-1.52393	0.127527
hsa-miR-30c-5p	447.381	0.225512	0.148038	1.52334	0.127675	0.662625
hsa-piR-26085	18.3794	-0.318578	0.209232	-1.52261	0.127857	0.662625
hsa-piR-12718	0.699078	-0.875425	0.575148	-1.52209	0.127987
hsa-piR-26374	0.492947	1.05871	0.695762	1.52165	0.128097
hsa-piR-26125	1.17373	0.718562	0.472543	1.52063	0.128353
tRNA-Asp-GTC-2-9	648.071	0.232787	0.153165	1.51985	0.128549	0.662625
5S_dup16_seq_155	2.04484	0.611458	0.402367	1.51965	0.128599
tRNA-Phe-GAA-9-1	6.47476	0.390331	0.256922	1.51926	0.128697	0.662625
hsa-piR-22231	1.6312	-0.559043	0.367977	-1.51923	0.128704
hsa-piR-2189	4.40153	-0.481626	0.317135	-1.51868	0.128844	0.662625
hsa-piR-12911	0.589926	-0.966871	0.637824	-1.51589	0.129548
tRNA-Glu-CTC-1-3	6707.32	0.307596	0.202977	1.51543	0.129665	0.664282
hsa-piR-20814	2.04567	-0.51126	0.337499	-1.51485	0.129811
LSU-rRNA_Hsa_dup20_seq_701	0.483302	-0.875641	0.578191	-1.51445	0.129912
5S_dup58_seq_1343	1.90116	0.531612	0.351116	1.51406	0.13001
hsa-piR-25832	3.20153	-0.483169	0.319554	-1.51201	0.130532
5S_dup11_seq_220	259.029	-0.433457	0.28673	-1.51173	0.130603	0.666527
5S_dup4_seq_489	0.759558	-1.28771	0.853405	-1.50891	0.131321
5S_dup7_seq_711	0.45009	-0.84529	0.560434	-1.50828	0.131483
hsa-piR-8884	1.10829	-0.700159	0.465252	-1.5049	0.132349
hsa-miR-151a-5p	0.411624	-1.1124	0.739214	-1.50484	0.132365
hsa-piR-25509	3.60191	-0.446724	0.297311	-1.50255	0.132955
hsa-piR-4283	2.1873	0.706583	0.470442	1.50196	0.133108
hsa-piR-4929	2.58778	0.497422	0.33158	1.50016	0.133573
hsa-piR-30021	4.16658	0.484522	0.323034	1.49991	0.133638	0.679411
hsa-piR-5639	1.34962	0.748244	0.498871	1.49988	0.133647
hsa-piR-23224	1.25045	-0.579035	0.3862	-1.49931	0.133792
hsa-piR-27211	0.718325	-0.800216	0.533723	-1.49931	0.133793
hsa-piR-25274	6.36696	0.465648	0.311301	1.49581	0.134702	0.681042
hsa-piR-15786	17.8271	-0.318576	0.213131	-1.49474	0.134981	0.681042
hsa-piR-19227	0.857932	0.992216	0.664435	1.49332	0.135353
hsa-piR-17168	0.938609	0.979153	0.65653	1.49141	0.135855
hsa-piR-9239	0.474755	-0.953391	0.639637	-1.49052	0.136088
hsa-piR-31022	1.1509	-0.682972	0.458816	-1.48855	0.136605
hsa-piR-7408	0.566165	1.03544	0.69588	1.48796	0.13676
hsa-piR-23083	0.471738	1.18278	0.794982	1.4878	0.136803
tRNA-Phe-GAA-5-1	0.436046	-1.08773	0.731275	-1.48745	0.136897
hsa-piR-17863	0.447357	-0.990415	0.667016	-1.48484	0.137585
hsa-piR-16571	1.4516	-0.559566	0.377022	-1.48417	0.137763
hsa-piR-18976	0.496394	-0.91859	0.619179	-1.48356	0.137926
hsa-piR-335	0.669648	0.991409	0.669012	1.4819	0.138367
LSU-rRNA_Hsa	32014.8	-0.161878	0.109353	-1.48033	0.138786	0.697595
hsa-piR-23318	0.690242	0.926726	0.62654	1.47912	0.139109
hsa-miR-26b-5p	3.8798	-0.591844	0.400876	-1.47638	0.139843
hsa-piR-33056	0.944277	0.853137	0.578274	1.47531	0.140128
hsa-piR-32939	0.634333	0.91308	0.618935	1.47524	0.140147
hsa-piR-25347	0.418788	-1.19522	0.812133	-1.47171	0.1411
hsa-piR-23832	1.68835	0.606255	0.412179	1.47086	0.14133
hsa-piR-12072	1.15568	-0.719323	0.489294	-1.47012	0.141529
hsa-piR-2746	1.11979	0.789195	0.537871	1.46726	0.142306
hsa-piR-21271	0.708936	0.997985	0.680618	1.46629	0.142569
hsa-piR-12294	2.45289	-0.511549	0.349006	-1.46573	0.142721
hsa-piR-2262	24.7913	-0.314686	0.214708	-1.46564	0.142746	0.707201
hsa-miR-449a	18.0106	-0.350793	0.23952	-1.46457	0.143039	0.707201
hsa-piR-32858	4.38395	0.524596	0.358295	1.46415	0.143154	0.707201
hsa-piR-24494	4.7024	0.386483	0.264096	1.46342	0.143353	0.707201
hsa-piR-2684	1.34925	-0.630347	0.430736	-1.46342	0.143353
hsa-piR-15280	21.8486	-0.293051	0.200595	-1.46091	0.14404	0.707201
hsa-piR-16012	0.281115	-1.25746	0.86127	-1.46001	0.144288
hsa-piR-10551	0.606246	0.959165	0.657058	1.45979	0.144349
hsa-piR-15406	0.331124	-1.32215	0.906249	-1.45892	0.144586
hsa-piR-4056	4.57451	0.419837	0.287889	1.45833	0.14475	0.707201
hsa-piR-28353	0.885643	-0.727887	0.499236	-1.458	0.14484
hsa-piR-18947	2.49364	-0.48304	0.331397	-1.45759	0.144954
hsa-piR-33087	1.22188	0.710711	0.487896	1.45669	0.145203
hsa-piR-1268	6.4733	0.460399	0.316171	1.45617	0.145345	0.707201
hsa-piR-2125	3.71127	0.537167	0.368981	1.45581	0.145445
hsa-piR-12906	0.539171	-0.815075	0.560073	-1.4553	0.145586
hsa-piR-28400	32.1637	0.472431	0.324663	1.45514	0.145629	0.707201
hsa-piR-19187	4.37721	-0.37773	0.259923	-1.45324	0.146157	0.707201
hsa-piR-25522	0.423143	1.08135	0.745276	1.45094	0.146797
hsa-piR-21894	1.67698	-0.583877	0.402703	-1.4499	0.147087
hsa-piR-27317	0.413	-1.0545	0.727382	-1.44972	0.147136
hsa-piR-6343	12.5376	0.364026	0.251195	1.44918	0.147289	0.707201
tRNA-SeC-TCA-2-1	1037.33	0.253461	0.175005	1.44831	0.14753	0.707201
hsa-piR-12333	1.41662	-0.594086	0.410264	-1.44806	0.147601
hsa-piR-28819	11.7945	-0.332853	0.229873	-1.44798	0.147621	0.707201
hsa-piR-3387	0.57168	-0.913064	0.630967	-1.44709	0.147872
hsa-piR-33151	28.3766	0.324105	0.224095	1.44628	0.148098	0.707201
hsa-piR-21294	6.81932	-0.328073	0.226857	-1.44617	0.14813	0.707201
hsa-piR-20607	0.95347	0.802126	0.555076	1.44507	0.148437
hsa-piR-26336	0.998048	0.750426	0.519707	1.44394	0.148756
hsa-piR-6546	0.673718	-0.848435	0.589421	-1.43944	0.150027
hsa-piR-12866	0.253476	-1.44926	1.0073	-1.43875	0.150222
hsa-piR-23778	3.54228	0.419788	0.292126	1.43701	0.150716
hsa-piR-29973	0.81355	-0.76225	0.530649	-1.43645	0.150875
tRNA-Cys-GCA-10-1	69.5166	0.556791	0.387719	1.43607	0.150983	0.714889
hsa-piR-21097	6.96048	-0.398377	0.277536	-1.43541	0.151171	0.714889
tRNA-Lys-TTT-3-4	5315.88	0.306027	0.21356	1.43298	0.151865	0.714889
tRNA-Gly-CCC-3-1	5.77255	0.339838	0.237168	1.4329	0.151887	0.714889
LSU-rRNA_Hsa_dup13_seq_1054	0.917009	-0.728471	0.508831	-1.43166	0.152242
hsa-miR-543	0.453487	1.00115	0.699768	1.43069	0.152518
5S_dup58_seq_1553	1.56031	0.826743	0.578139	1.43001	0.152715
hsa-piR-26309	4.86523	-0.412184	0.288242	-1.43	0.152718	0.71627
hsa-piR-3260	3.8256	-0.416904	0.291684	-1.4293	0.152918
hsa-piR-3235	0.325657	-1.25073	0.876559	-1.42687	0.153618
hsa-miR-16-5p	47.2072	0.214667	0.15047	1.42664	0.153683	0.71709
hsa-piR-2538	3.38865	-0.428659	0.300637	-1.42584	0.153915
hsa-piR-16289	2.1017	-0.487796	0.34225	-1.42526	0.154081
hsa-piR-23642	0.382575	-1.07082	0.751326	-1.42524	0.154087
hsa-piR-27786	1.7909	-0.573613	0.402478	-1.4252	0.154098
hsa-piR-30079	0.908987	-0.668052	0.46926	-1.42363	0.154555
hsa-piR-27179	2.03014	-0.527294	0.370414	-1.42353	0.154584
tRNA-Glu-TTC-8-1	35.9133	0.380489	0.267307	1.42341	0.154616	0.71709
hsa-piR-20884	0.371189	-1.0184	0.715612	-1.42312	0.1547
hsa-piR-26293	17.134	-0.373355	0.262936	-1.41995	0.155623	0.71709
hsa-piR-4218	4.46393	-0.367442	0.258964	-1.41889	0.155931	0.71709
hsa-piR-13643	21.638	-0.324021	0.228374	-1.41881	0.155954	0.71709
hsa-piR-28576	0.563316	0.92311	0.651285	1.41737	0.156375
hsa-miR-181d-5p	0.995996	-0.703887	0.49673	-1.41704	0.156471
hsa-miR-23b-3p	39.8898	0.29346	0.207124	1.41684	0.156531	0.71709
hsa-piR-27252	1.94931	-0.542485	0.382946	-1.41661	0.156597
hsa-piR-25144	0.378925	-1.12997	0.797697	-1.41654	0.156617
hsa-piR-7749	1.86858	0.589925	0.416855	1.41518	0.157015
5S_dup39_seq_629	8.11652	-0.478545	0.338276	-1.41466	0.157169	0.71709
hsa-piR-13610	69.1268	-0.30817	0.217857	-1.41455	0.1572	0.71709
hsa-piR-12411	1.51689	-0.700901	0.495844	-1.41355	0.157494
tRNA-Arg-CCG-2-1	888.906	0.335579	0.237578	1.4125	0.157803	0.717383
hsa-piR-13864	1.63645	-0.521824	0.369482	-1.41231	0.157858
hsa-piR-3999	0.498994	-0.874351	0.619672	-1.41099	0.158247
5S_dup9_seq_892	0.988254	-0.658716	0.467074	-1.4103	0.15845
hsa-miR-589-5p	0.387242	-1.0503	0.744758	-1.41025	0.158465
hsa-piR-441	0.609526	0.977322	0.693026	1.41023	0.158473
hsa-piR-12654	858.076	-0.204154	0.144788	-1.41001	0.158535	0.71779
hsa-piR-31233	1.70485	-0.580673	0.412343	-1.40823	0.159063
hsa-piR-5474	0.924462	-0.729566	0.518135	-1.40806	0.159113
hsa-piR-31480	5.04249	0.407648	0.289511	1.40806	0.159114	0.71779
hsa-miR-1301-3p	1.53162	0.709465	0.504349	1.40669	0.159518
hsa-piR-8432	2.19312	-0.475959	0.338397	-1.40651	0.159572
tRNA-Ser-GCT-2-1	6.88557	-0.422975	0.300734	-1.40647	0.159583	0.71779
hsa-piR-13989	89.6992	-0.346505	0.246745	-1.4043	0.160229	0.71779
hsa-piR-8132	5.10611	-0.407397	0.290355	-1.4031	0.160587	0.71779
hsa-piR-29788	1.03509	-0.669391	0.477982	-1.40045	0.161378
hsa-piR-23409	0.453696	1.07667	0.769875	1.3985	0.161963
hsa-piR-26682	0.492809	-0.894476	0.639768	-1.39813	0.162075
LSU-rRNA_Hsa_dup6_seq_740	24.4536	-0.379404	0.271551	-1.39718	0.16236	0.719154
5S_dup6_seq_836	11.5785	-0.515169	0.368974	-1.39622	0.162648	0.719154
hsa-piR-11401	0.50273	-0.867768	0.621646	-1.39592	0.162738
hsa-piR-11901	1.08674	-0.71445	0.512009	-1.39539	0.1629
hsa-piR-8392	11.5251	-0.327898	0.235157	-1.39438	0.163203	0.719154
hsa-miR-183-3p	0.426858	0.954034	0.684776	1.3932	0.163558
hsa-piR-8702	8.65782	-0.363543	0.26099	-1.39294	0.163638	0.719154
hsa-piR-29677	0.388046	-0.966002	0.693896	-1.39214	0.163879
hsa-piR-13316	4.25319	0.42626	0.306258	1.39183	0.163974	0.719154
hsa-piR-23774	1.45576	-0.574729	0.41306	-1.39139	0.164106
hsa-piR-29419	0.535727	-0.992809	0.714687	-1.38915	0.164787
hsa-piR-6281	1.62512	-0.570553	0.410866	-1.38866	0.164936
hsa-piR-2348	1.9323	0.59569	0.429102	1.38822	0.165069
hsa-piR-31682	8.49176	-0.344399	0.248092	-1.38819	0.165079	0.719154
hsa-piR-32947	26.2863	0.320714	0.231052	1.38806	0.165118	0.719154
5S_dup18_seq_926	0.49821	-1.00103	0.721245	-1.38792	0.165161
hsa-piR-19588	0.507475	-0.970392	0.699954	-1.38636	0.165636
hsa-piR-10181	4.86307	-0.410292	0.29595	-1.38635	0.165639	0.719154
hsa-piR-32715	6.37996	0.378859	0.273349	1.38599	0.165751	0.719154
hsa-piR-29245	0.453609	1.14218	0.827446	1.38037	0.167473
hsa-piR-26713	1.11194	0.715744	0.518518	1.38036	0.167474
hsa-piR-6128	1.7578	-0.656118	0.475379	-1.3802	0.167526
hsa-piR-670	11.5135	-0.315256	0.229055	-1.37633	0.168719	0.727811
LSU-rRNA_Hsa_dup25_seq_823	0.578226	-0.847907	0.617035	-1.37416	0.169391
hsa-piR-369	0.858155	-0.679373	0.494452	-1.37399	0.169444
hsa-piR-8912	14.6862	-0.346638	0.252406	-1.37333	0.169648	0.727811
hsa-miR-99b-5p	40.2381	0.356023	0.259407	1.37245	0.169924	0.727811
SSU-rRNA_Hsa_dup4_seq_1259	4.60204	-0.514206	0.37467	-1.37242	0.169932	0.727811
hsa-miR-204-5p	2.22801	0.504403	0.367665	1.37191	0.170091
hsa-piR-11448	0.922589	0.85034	0.619857	1.37183	0.170116
hsa-piR-17164	0.748059	0.967172	0.705306	1.37128	0.170288
hsa-piR-16935	0.671084	0.829495	0.60587	1.3691	0.170969
5S_dup2_seq_409	3.17147	0.401097	0.293194	1.36803	0.171303
hsa-piR-19076	9.78547	-0.333366	0.243713	-1.36786	0.171356	0.731558
hsa-piR-3565	2.61403	-0.546403	0.399509	-1.36769	0.17141
hsa-piR-19100	2.53892	-0.498156	0.364997	-1.36482	0.172309
tRNA-Cys-GCA-18-1	0.812917	0.826254	0.606285	1.36281	0.172941
hsa-piR-26311	2.50467	-0.484103	0.355235	-1.36277	0.172956
hsa-piR-18184	2.05573	-0.500989	0.367742	-1.36234	0.173091
hsa-piR-4020	0.65734	-0.797153	0.585947	-1.36045	0.173686
hsa-piR-897	2.69016	-0.427745	0.314707	-1.35919	0.174087
hsa-piR-26835	1.3662	0.615817	0.453805	1.35701	0.174778
hsa-piR-29009	0.289041	-1.09794	0.810274	-1.35503	0.175409
hsa-piR-8613	5.05859	-0.363917	0.268654	-1.35459	0.175547	0.747055
hsa-piR-24423	1.6468	-0.52744	0.38946	-1.35429	0.175645
hsa-piR-17900	2.13178	0.507049	0.374736	1.35308	0.176029
LSU-rRNA_Hsa_seq_634	2.61383	0.472282	0.349048	1.35306	0.176037
hsa-piR-15656	4.79923	0.412552	0.305216	1.35167	0.176481	0.748637
hsa-piR-9245	0.55283	0.890579	0.659099	1.35121	0.176629
hsa-piR-33032	2.56747	-0.403194	0.298918	-1.34884	0.177387
hsa-piR-3774	0.387744	1.17662	0.872511	1.34854	0.177483
hsa-miR-1246	3.45733	0.569827	0.423273	1.34624	0.178226
LSU-rRNA_Hsa_dup4_seq_1434	0.708433	0.854405	0.634834	1.34587	0.178344
5S_dup46_seq_763	4.4816	0.538635	0.400501	1.3449	0.178656	0.754883
5S_dup56_seq_978	0.649687	0.824131	0.6131	1.3442	0.178882
hsa-piR-19470	8.9967	-0.294142	0.219081	-1.34262	0.179396	0.754883
hsa-piR-963	11.8567	-0.319414	0.238045	-1.34182	0.179653	0.754883
hsa-piR-31017	1.53175	-0.491702	0.366618	-1.34118	0.179861
hsa-piR-26807	1.63216	-0.488409	0.364248	-1.34087	0.179963
hsa-piR-1403	0.249451	-1.36801	1.02031	-1.34078	0.17999
hsa-piR-13099	2.28771	-0.447952	0.334168	-1.3405	0.180083
hsa-piR-13437	1.00179	0.720424	0.537532	1.34024	0.180166
hsa-piR-3010	1.47606	0.579688	0.43276	1.33952	0.180403
hsa-piR-9731	2.84415	-0.442437	0.330396	-1.33911	0.180534
hsa-piR-26808	7.85598	0.338535	0.252834	1.33896	0.180582	0.756401
hsa-piR-21752	0.557954	-0.758799	0.566843	-1.33864	0.180687
hsa-piR-24311	3.28882	-0.412998	0.309195	-1.33572	0.181641
hsa-piR-15748	4.90579	-0.456808	0.342051	-1.3355	0.181714	0.758595
hsa-piR-26026	35.9015	-0.256582	0.192358	-1.33387	0.182245	0.758595
hsa-piR-16795	3.60464	-0.419565	0.31518	-1.33119	0.183126
5S_dup47_seq_1079	2.32436	0.479293	0.360462	1.32966	0.18363
hsa-piR-14242	5.99584	0.398939	0.300286	1.32853	0.184003	0.763504
hsa-piR-31127	0.428934	-0.909044	0.684413	-1.32821	0.184109
hsa-piR-1301	4.05761	0.412187	0.310659	1.32681	0.184571	0.763504
hsa-piR-9744	1.88883	-0.459346	0.346215	-1.32677	0.184586
hsa-piR-3360	1.44435	-0.515925	0.38959	-1.32428	0.185411
hsa-piR-9957	2.07837	0.528111	0.399317	1.32253	0.185991
hsa-piR-8721	0.825598	-0.701313	0.530645	-1.32162	0.186293
tRNA-Gly-CCC-2-2	419.599	0.176212	0.133409	1.32084	0.186555	0.769321
hsa-piR-13149	4.59812	-0.372907	0.283029	-1.31756	0.187652	0.770929
hsa-miR-4278	0.462932	0.994394	0.754794	1.31744	0.187692
hsa-miR-98-5p	0.546564	0.922984	0.701211	1.31627	0.188083
hsa-piR-32883	126.093	0.217051	0.164905	1.31621	0.188102	0.770929
hsa-piR-30798	0.502898	-0.834897	0.635631	-1.31349	0.189017
hsa-piR-18404	6.12772	-0.341219	0.260076	-1.312	0.189522	0.774364
hsa-piR-13995	1.92651	-0.485288	0.369959	-1.31174	0.189609
hsa-piR-14621	3.43666	-0.360296	0.274723	-1.31149	0.189694
hsa-piR-28538	0.849832	0.694111	0.530101	1.3094	0.1904
hsa-piR-10225	3.18646	-0.376942	0.287969	-1.30897	0.190546
5S_dup27_seq_1210	0.536755	-0.783897	0.599691	-1.30717	0.191156
hsa-piR-8996	46.1595	-0.273129	0.209	-1.30684	0.191268	0.779111
hsa-piR-30887	1.71621	0.501586	0.383833	1.30678	0.191287
hsa-piR-31508	1.02687	-0.64474	0.493691	-1.30596	0.191567
hsa-piR-17019	1.14812	0.622869	0.478294	1.30227	0.192823
tRNA-Phe-GAA-1-2	15.2386	-0.342824	0.263269	-1.30218	0.192856	0.783182
hsa-piR-6143	0.431031	1.02425	0.787209	1.30111	0.19322
hsa-piR-12190	0.527543	-0.799151	0.614493	-1.30051	0.193428
hsa-piR-1334	0.420068	-0.861998	0.663289	-1.29958	0.193744
hsa-piR-19535	0.676425	0.749036	0.576442	1.29941	0.193803
hsa-piR-11053	0.441458	-0.876198	0.674482	-1.29907	0.19392
hsa-piR-29900	4.32723	0.39781	0.306628	1.29737	0.194504	0.78661
hsa-piR-27611	1.92867	-0.550493	0.424359	-1.29723	0.19455
hsa-piR-32926	8.73701	0.333531	0.2573	1.29627	0.194881	0.78661
LSU-rRNA_Hsa_dup2_seq_675	1.45321	-0.481194	0.371271	-1.29607	0.194951
tRNA-Ala-AGC-12-3	0.878435	1.09315	0.843585	1.29584	0.19503
hsa-piR-17371	0.458708	-0.975077	0.753574	-1.29394	0.195688
hsa-piR-7480	1.11804	0.638063	0.493381	1.29325	0.195926
hsa-piR-23577	0.380209	0.994711	0.769225	1.29313	0.195965
hsa-piR-10345	0.912522	-0.610176	0.471924	-1.29295	0.196027
hsa-piR-19348	0.754747	0.85345	0.660123	1.29286	0.196058
5S_dup47_seq_1239	1.07121	-0.650116	0.502873	-1.2928	0.196079
hsa-piR-27267	28.3386	-0.247704	0.191627	-1.29264	0.196137	0.787384
hsa-piR-4146	4.82507	-0.380932	0.294771	-1.2923	0.196255	0.787384
hsa-piR-11298	1.53792	0.663597	0.513525	1.29224	0.196275
hsa-piR-13517	2.22815	0.463361	0.358729	1.29167	0.19647
hsa-piR-13916	2.08351	-0.468785	0.362946	-1.29161	0.196492
hsa-piR-7078	1.67456	0.546251	0.42361	1.28951	0.19722
hsa-piR-26513	2.14242	-0.520575	0.403736	-1.28939	0.197261
hsa-piR-13383	1.78583	-0.471362	0.365594	-1.28931	0.197292
hsa-piR-15416	0.872359	0.678902	0.527675	1.28659	0.198236
hsa-piR-14592	1.14739	0.688978	0.535671	1.28619	0.198375
hsa-piR-30122	9.42365	-0.298239	0.231957	-1.28575	0.198529	0.793461
hsa-piR-10728	0.746278	-0.825724	0.642757	-1.28466	0.198912
hsa-miR-194-5p	53.1029	-0.210852	0.164149	-1.28452	0.198961	0.793461
hsa-piR-3847	0.527024	0.860159	0.670306	1.28323	0.199411
hsa-piR-8524	0.914787	-0.665194	0.51866	-1.28253	0.199658
tRNA-Lys-CTT-16-1	16.9757	0.278015	0.216788	1.28243	0.199693	0.794003
hsa-piR-21806	2.17692	-0.4727	0.368757	-1.28187	0.199887
hsa-piR-29054	2.13591	0.472513	0.369268	1.27959	0.200688
hsa-piR-15527	1.63815	-0.632665	0.494518	-1.27936	0.200772
hsa-piR-26101	0.283566	-1.24257	0.972505	-1.2777	0.201355
hsa-miR-378c	0.739579	0.924203	0.72336	1.27765	0.201372
tRNA-Leu-AAG-4-1	16.8137	0.263924	0.206598	1.27747	0.201436	0.79814
hsa-let-7b-5p	62.4354	0.293223	0.229841	1.27576	0.20204	0.79814
hsa-piR-17233	2.54187	-0.495577	0.388624	-1.27521	0.202235
hsa-piR-20641	0.390645	-0.828626	0.650478	-1.27387	0.202709
hsa-piR-16790	2.7549	-0.45839	0.360101	-1.27295	0.203037
hsa-piR-9520	19.3149	-0.278216	0.21863	-1.27254	0.203181	0.79814
hsa-piR-15208	2.20883	-0.526702	0.413917	-1.27248	0.203202
hsa-piR-26264	0.248662	-1.10722	0.870627	-1.27175	0.203461
hsa-piR-23223	0.960356	0.668543	0.525767	1.27156	0.203531
hsa-piR-18800	6.35756	0.341493	0.26876	1.27063	0.203862	0.79814
hsa-piR-8591	2.46237	0.43507	0.342482	1.27034	0.203962
tRNA-Glu-CTC-1-4	6419.71	0.252871	0.19906	1.27033	0.203968	0.79814
hsa-piR-27272	0.680524	-0.694172	0.546878	-1.26934	0.204321
hsa-piR-15180	1.59793	-0.48069	0.378779	-1.26905	0.204422
hsa-piR-8812	0.527962	-0.869835	0.686133	-1.26774	0.204893
tRNA-Val-CAC-6-1	12.5452	-0.333087	0.262779	-1.26756	0.204957	0.79814
hsa-piR-31431	3.9704	0.359401	0.28362	1.2672	0.205085	0.79814
hsa-piR-9534	1.58993	-0.535276	0.422453	-1.26707	0.205131
hsa-piR-19180	18.4722	-0.311914	0.246391	-1.26593	0.205537	0.79814
hsa-piR-2947	0.609857	-0.784703	0.620312	-1.26501	0.205867
hsa-piR-4465	0.731616	0.792162	0.626471	1.26448	0.206057
hsa-miR-186-5p	9.88532	-0.368533	0.29163	-1.2637	0.206337	0.79814
hsa-miR-224-5p	1.85156	0.529889	0.419316	1.2637	0.206338
hsa-piR-9658	1.74683	-0.56024	0.443364	-1.26361	0.206369
hsa-piR-9635	0.528183	0.881432	0.698891	1.26119	0.207242
hsa-piR-8059	2.10577	0.494882	0.392825	1.2598	0.207741
hsa-piR-9278	0.445682	-0.896056	0.711365	-1.25963	0.207803
5S_dup1_seq_902	291.62	-0.323724	0.257006	-1.2596	0.207815	0.79814
hsa-piR-25212	3.19579	0.389264	0.30911	1.2593	0.20792
5S_dup14_seq_293	5.98367	0.380706	0.302356	1.25913	0.207983	0.79814
LSU-rRNA_Hsa_dup10_seq_573	10.0483	-0.28734	0.228432	-1.25788	0.208434	0.79814
hsa-piR-27229	0.373358	-0.907539	0.721587	-1.2577	0.208501
hsa-piR-2278	10.6582	0.333421	0.265117	1.25764	0.208523	0.79814
hsa-piR-1930	0.567433	0.86351	0.687353	1.25628	0.209013
hsa-piR-7235	1.57584	-0.536852	0.427651	-1.25535	0.209352
hsa-miR-518c-3p	0.42971	1.01605	0.809382	1.25534	0.209356
hsa-miR-491-5p	0.661997	0.747265	0.595363	1.25514	0.209427
5S_dup22_seq_1204	0.557212	0.862904	0.68777	1.25464	0.209609
tRNA-Gly-GCC-1-1	7339.74	-0.345005	0.275477	-1.25239	0.210427	0.801219
hsa-piR-29011	1.43695	0.556221	0.444588	1.25109	0.2109
hsa-piR-32962	13.0644	-0.263538	0.210656	-1.25104	0.210921	0.801219
5S_dup28_seq_41	9.90703	-0.269809	0.215768	-1.25046	0.211132	0.801219
hsa-piR-17089	0.787358	-0.587061	0.469865	-1.24943	0.21151
tRNA-Tyr-GTA-4-1	1.31805	-0.80166	0.642438	-1.24784	0.212089
tRNA-Phe-GAA-10-1	6.71235	0.341948	0.274139	1.24735	0.212269	0.803244
hsa-piR-4528	0.278374	-1.22206	0.980691	-1.24612	0.21272
hsa-piR-4040	0.552012	-0.720042	0.579194	-1.24318	0.213802
5S_dup55_seq_275	0.668466	-0.882515	0.710039	-1.24291	0.213901
5S_dup61_seq_1414	1.74235	-0.500437	0.402673	-1.24279	0.213946
tRNA-Gly-TCC-1-1	119.74	-0.198107	0.159442	-1.2425	0.214051	0.807628
hsa-piR-14628	0.455276	0.87147	0.70158	1.24215	0.21418
hsa-piR-2442	0.853868	0.772585	0.622528	1.24104	0.214589
hsa-piR-32844	26.4606	0.287789	0.231918	1.24091	0.21464	0.807628
hsa-miR-21-3p	1.78482	0.607944	0.490391	1.23971	0.215082
hsa-piR-28628	0.231492	-1.26381	1.02015	-1.23884	0.215404
hsa-piR-27105	0.559946	0.874897	0.706467	1.23841	0.215564
hsa-piR-2206	1.01559	-0.567698	0.458505	-1.23815	0.21566
tRNA-Leu-TAA-1-1	28.6627	-0.246132	0.198826	-1.23792	0.215744	0.809496
hsa-miR-202-5p	0.433858	0.899136	0.726589	1.23748	0.21591
hsa-miR-519d-3p	0.689342	0.782391	0.63311	1.23579	0.216537
hsa-piR-30903	3.0647	-0.383144	0.310184	-1.23522	0.21675
hsa-piR-28864	3.24362	-0.394823	0.319933	-1.23408	0.217174
hsa-piR-22534	0.28588	1.20453	0.976322	1.23374	0.217298
hsa-piR-17475	0.57698	-0.709066	0.574906	-1.23336	0.217441
5S_dup44_seq_1235	6.49433	0.39873	0.323427	1.23283	0.21764	0.814091
5S_dup71_seq_95	0.82857	-0.715025	0.580263	-1.23224	0.217858
hsa-piR-33024	0.761529	-0.99681	0.810949	-1.22919	0.219
hsa-piR-31470	0.470298	0.900282	0.732479	1.22909	0.219039
5S_dup13_seq_374	3.63633	0.393531	0.320181	1.22909	0.219039
hsa-piR-10238	0.410429	0.855858	0.697156	1.22764	0.219581
hsa-piR-26778	0.464944	-0.793175	0.646193	-1.22746	0.21965
hsa-piR-10674	26.6733	-0.289494	0.236176	-1.22576	0.220291	0.814091
5S_seq_1172	12.0592	0.340319	0.277678	1.22559	0.220353	0.814091
hsa-miR-191-5p	302.443	0.288503	0.235468	1.22523	0.220488	0.814091
hsa-miR-4508	1.54571	-0.471375	0.384875	-1.22475	0.220669
hsa-piR-16988	0.422007	0.852844	0.696411	1.22463	0.220716
5S_dup9_seq_1488	0.671484	0.681332	0.556567	1.22417	0.220888
hsa-piR-25810	8.7125	-0.338791	0.276778	-1.22406	0.220931	0.814091
hsa-piR-15874	2.47981	0.477784	0.390843	1.22245	0.221539
5S_dup34_seq_1473	0.552158	-0.836442	0.684431	-1.2221	0.221671
tRNA-Ala-TGC-7-1	21.3757	0.296185	0.242591	1.22092	0.222115	0.814091
hsa-piR-3854	2.57918	0.447093	0.366248	1.22074	0.222185
hsa-piR-28513	0.466563	0.968842	0.793694	1.22067	0.22221
hsa-piR-32989	36.8428	0.237208	0.194402	1.22019	0.222391	0.814091
hsa-miR-503-5p	1.21827	0.604629	0.495594	1.22001	0.222461
hsa-piR-21617	4.56647	-0.35209	0.288633	-1.21985	0.222521	0.814091
hsa-piR-4484	0.358806	-0.853708	0.700073	-1.21946	0.222671
hsa-piR-24383	2.06445	0.473809	0.388957	1.21815	0.223166
hsa-piR-6610	28.8148	-0.245865	0.201839	-1.21812	0.223178	0.814091
hsa-piR-18431	10.1368	-0.277067	0.227721	-1.2167	0.22372	0.814091
hsa-piR-26981	0.622076	-0.745732	0.613078	-1.21637	0.223843
hsa-piR-24575	5.91597	0.447752	0.368483	1.21512	0.22432	0.814091
hsa-piR-28705	0.921407	0.657818	0.542166	1.21331	0.22501
hsa-miR-200a-3p	22.0104	0.329543	0.271607	1.21331	0.225012	0.814091
hsa-piR-7741	1.69411	-0.499504	0.411779	-1.21304	0.225115
hsa-piR-24390	1.19657	0.667197	0.55038	1.21225	0.225417
hsa-piR-17187	4.37821	-0.456483	0.377037	-1.21071	0.226007	0.814091
hsa-piR-29325	0.760274	0.760396	0.628301	1.21024	0.226186
hsa-piR-9248	1.95063	-0.502806	0.415942	-1.20884	0.226726
hsa-piR-30732	15.6757	-0.281998	0.233291	-1.20878	0.226747	0.814091
hsa-piR-334	9.3628	0.325533	0.269349	1.20859	0.22682	0.814091
hsa-piR-16647	1.3191	-0.518861	0.430176	-1.20616	0.227755
hsa-piR-1679	5.56327	0.369121	0.306359	1.20486	0.228256	0.814091
hsa-piR-7822	25.2899	-0.286672	0.238162	-1.20368	0.228711	0.814091
hsa-piR-16329	3.62006	-0.502611	0.417923	-1.20264	0.229116
hsa-piR-12082	0.888406	0.595972	0.495711	1.20226	0.229264
hsa-piR-24446	1.74525	0.49943	0.416068	1.20036	0.23
tRNA-Arg-TCT-3-2	0.431648	0.809656	0.674832	1.19979	0.230222
hsa-piR-19109	0.847004	-0.692893	0.577605	-1.1996	0.230296
tRX-Lys-NNN-1-1	0.872164	0.753121	0.62888	1.19756	0.231089
hsa-let-7f-5p	73.3385	0.205626	0.171727	1.1974	0.231152	0.814091
hsa-piR-7829	11.7675	-0.280387	0.234191	-1.19726	0.231207	0.814091
hsa-piR-17621	110.909	-0.262144	0.219398	-1.19483	0.232152	0.814091
hsa-piR-4829	1.47875	-0.449977	0.376613	-1.1948	0.232165
hsa-miR-424-5p	0.191543	-1.36686	1.1441	-1.19471	0.232201
hsa-piR-7799	7.27077	-0.313013	0.262301	-1.19333	0.232738	0.814091
tRX-Ala-NNN-5-1	0.733337	0.765696	0.641672	1.19328	0.232759
hsa-piR-29691	1.39546	-0.506455	0.424514	-1.19302	0.23286
hsa-piR-5868	0.621074	-0.673898	0.565009	-1.19272	0.232979
hsa-piR-28021	1.6993	-0.529654	0.444623	-1.19124	0.233558
hsa-piR-29310	4.8402	0.353199	0.296521	1.19114	0.233597	0.814091
hsa-piR-31872	4.66402	0.358322	0.300947	1.19065	0.233792	0.814091
hsa-piR-5746	22.4023	-0.337589	0.283574	-1.19048	0.233858	0.814091
hsa-piR-10103	7.11577	0.32303	0.271606	1.18933	0.234309	0.814091
hsa-piR-15747	20.2853	-0.279896	0.235403	-1.18901	0.234437	0.814091
hsa-piR-30391	1.43006	-0.581748	0.489324	-1.18888	0.234486
5S_dup30_seq_941	342.667	-0.316813	0.266568	-1.18849	0.23464	0.814091
hsa-miR-132-3p	1.0696	-0.530626	0.446793	-1.18763	0.234978
hsa-miR-30e-3p	9.445	0.207787	0.175125	1.18651	0.235421	0.814091
hsa-piR-7663	0.496674	-0.854375	0.720628	-1.1856	0.235781
tRNA-Cys-GCA-14-1	48.9789	0.370184	0.312302	1.18534	0.235884	0.814091
hsa-piR-20111	1.89567	0.421396	0.355669	1.1848	0.236097
hsa-piR-8709	21.6684	-0.269897	0.227972	-1.1839	0.236452	0.814091
hsa-piR-21532	8.30313	-0.313638	0.265012	-1.18349	0.236615	0.814091
hsa-piR-19894	0.792351	-0.646139	0.546603	-1.1821	0.237166
5S_dup70_seq_1161	35.7032	-0.269168	0.227815	-1.18152	0.237396	0.814091
hsa-piR-31436	1.89179	0.497894	0.421592	1.18099	0.237608
hsa-piR-17817	0.542723	0.751367	0.636935	1.17966	0.238135
hsa-miR-9-5p	31.5041	-0.26624	0.225738	-1.17942	0.238232	0.814091
tRNA-Asp-GTC-2-1	619.422	0.180837	0.15341	1.17878	0.238485	0.814091
hsa-piR-1316	2.35598	0.430761	0.365523	1.17848	0.238605
hsa-piR-20227	0.256332	-0.997438	0.847414	-1.17704	0.23918
hsa-piR-5173	2.02744	0.428942	0.364531	1.17669	0.239318
LSU-rRNA_Hsa_dup6_seq_676	749.073	-0.15389	0.130823	-1.17632	0.239466	0.814091
hsa-piR-24644	7.87225	0.383839	0.326377	1.17606	0.239571	0.814091
hsa-piR-536	6.145	-0.316442	0.269076	-1.17603	0.239582	0.814091
hsa-piR-4889	0.883792	-0.684916	0.582676	-1.17547	0.239809
tRNA-Gln-CTG-8-2	0.306882	1.18242	1.00598	1.17538	0.239841
hsa-piR-12942	1.79996	0.510986	0.435	1.17468	0.240123
5S_dup16_seq_682	0.680294	0.851913	0.725374	1.17445	0.240216
LSU-rRNA_Hsa_dup21_seq_1247	0.67979	-0.630953	0.537931	-1.17292	0.240826
hsa-piR-25161	0.419816	-0.742235	0.632925	-1.17271	0.240913
tRX-Val-NNN-5-1	21.2568	0.336008	0.286639	1.17223	0.241103	0.816845
hsa-piR-17976	1.10447	0.567974	0.484528	1.17222	0.241108
hsa-piR-33022	0.465575	-0.751415	0.642251	-1.16997	0.242012
hsa-piR-17072	0.896505	0.715952	0.612219	1.16944	0.242227
hsa-piR-4155	8.69328	0.29333	0.250919	1.16903	0.242393	0.816845
hsa-piR-6829	4.61388	0.350216	0.299599	1.16895	0.242425	0.816845
5S_dup15_seq_430	1.08243	0.579172	0.495592	1.16865	0.242545
hsa-piR-24094	1.05092	-0.570529	0.488236	-1.16855	0.242584
hsa-piR-30519	1.5786	-0.475076	0.406899	-1.16755	0.242987
hsa-piR-26687	0.864751	-0.537572	0.460715	-1.16682	0.243283
hsa-piR-23281	9.42989	-0.294247	0.252266	-1.16641	0.243447	0.816845
hsa-piR-24220	1.78988	-0.475591	0.407757	-1.16636	0.243469
hsa-piR-5784	0.314829	-1.09183	0.936677	-1.16564	0.24376
hsa-piR-6543	2.45888	-0.430609	0.369865	-1.16423	0.24433
hsa-piR-2846	2.23839	-0.431256	0.370428	-1.16421	0.24434
hsa-miR-3615	0.460015	0.887747	0.764479	1.16124	0.245543
tRNA-Asp-GTC-2-6	274.731	-0.202346	0.174262	-1.16116	0.245577	0.816845
tRNA-Gly-CCC-4-1	44.4886	0.18147	0.156298	1.16105	0.245621	0.816845
5S_dup53_seq_1245	1.88474	-0.550532	0.474303	-1.16072	0.245757
hsa-piR-31477	2.22886	-0.421738	0.363454	-1.16036	0.245901
tRNA-Trp-CCA-4-1	50.107	0.20983	0.180862	1.16017	0.24598	0.816845
hsa-piR-14047	12.6916	0.291045	0.251177	1.15872	0.246569	0.816845
hsa-piR-9377	5.2699	-0.328217	0.28343	-1.15802	0.246857	0.816845
hsa-piR-3813	4.91315	-0.3172	0.273987	-1.15772	0.246977	0.816845
hsa-piR-16648	6.19099	-0.283648	0.245089	-1.15733	0.247138	0.816845
hsa-piR-4164	1.2927	-0.508678	0.439535	-1.15731	0.247146
hsa-piR-30096	0.673272	-0.711741	0.61526	-1.15681	0.247349
hsa-miR-340-5p	0.467203	-0.711572	0.615415	-1.15625	0.247579
hsa-piR-10593	3.29254	-0.378175	0.327286	-1.15549	0.247891
hsa-piR-19211	2.26987	0.456791	0.395409	1.15524	0.247993
hsa-piR-6874	1.60631	0.473946	0.410483	1.1546	0.248253
hsa-piR-21309	2.80742	0.387157	0.335382	1.15437	0.248347
hsa-piR-11532	5.64797	-0.280786	0.243242	-1.15435	0.248357	0.818841
hsa-piR-25786	1.11949	0.595204	0.515976	1.15355	0.248685
hsa-piR-24887	2.03338	0.432469	0.375121	1.15288	0.24896
hsa-piR-9567	0.694402	-0.610425	0.530128	-1.15147	0.249541
5S_dup9_seq_370	2.38479	-0.437155	0.379732	-1.15122	0.249641
5S_dup31_seq_1380	3.44708	-0.364572	0.316887	-1.15048	0.249946
hsa-piR-32976	56.8174	-0.174668	0.151889	-1.14998	0.250154	0.819451
5S_dup25_seq_703	3.64612	-0.356453	0.309996	-1.14987	0.250199
hsa-piR-27690	3.6593	-0.361483	0.314668	-1.14878	0.250649
tRNA-Lys-CTT-1-1	55002.2	0.259155	0.225785	1.14779	0.251055	0.819451
hsa-piR-2547	17.786	-0.23329	0.203376	-1.14709	0.251346	0.819451
hsa-piR-3026	1.35527	0.589696	0.514358	1.14647	0.251601
hsa-piR-30588	9.19665	-0.286191	0.249628	-1.14647	0.251601	0.819451
hsa-piR-8599	23.2115	-0.232106	0.20246	-1.14643	0.251618	0.819451
hsa-piR-2484	1.84672	0.466645	0.407505	1.14513	0.252157
5S_dup33_seq_607	2.85613	-0.359216	0.313748	-1.14492	0.252243
hsa-piR-21388	1.77621	-0.425911	0.372077	-1.14469	0.25234
hsa-piR-1674	0.471398	0.802147	0.701254	1.14388	0.252675
hsa-piR-18819	7.12466	-0.291412	0.254928	-1.14311	0.252992	0.819918
hsa-piR-8595	1.22175	-0.477988	0.418225	-1.1429	0.253081
hsa-piR-24912	0.411723	0.897165	0.785144	1.14268	0.253173
hsa-piR-11947	0.771447	0.742215	0.650094	1.1417	0.253577
hsa-piR-3584	55.266	-0.276233	0.241969	-1.1416	0.253619	0.819918
hsa-piR-9830	0.425253	0.745899	0.653686	1.14107	0.253842
hsa-piR-17829	6.20578	-0.327798	0.287293	-1.14099	0.253875	0.819918
hsa-piR-11564	1.57203	-0.417905	0.366471	-1.14035	0.25414
hsa-piR-9105	0.310958	-1.05041	0.921166	-1.14031	0.254158
hsa-piR-18784	3.92441	-0.342347	0.300265	-1.14015	0.254224	0.819918
hsa-piR-27315	0.449059	-0.738827	0.648936	-1.13852	0.254903
hsa-piR-29589	7.2386	0.314563	0.276373	1.13818	0.255045	0.820579
hsa-piR-5726	0.94247	0.606144	0.53256	1.13817	0.255049
hsa-piR-2783	0.668035	-0.725074	0.637165	-1.13797	0.255133
hsa-piR-18275	3.08057	0.383802	0.33765	1.13669	0.25567
5S_dup47_seq_266	8.49904	0.408039	0.358984	1.13665	0.255684	0.820653
hsa-piR-7671	0.401878	0.837863	0.73936	1.13323	0.257119
hsa-piR-7157	0.845613	-0.584659	0.516048	-1.13295	0.257234
hsa-piR-795	0.442165	-0.847952	0.748566	-1.13277	0.257312
hsa-piR-3498	0.433231	0.815147	0.71966	1.13268	0.257347
hsa-piR-32001	34.9805	-0.243385	0.215003	-1.13201	0.257631	0.824915
hsa-miR-106b-3p	1.57622	-0.406244	0.35923	-1.13087	0.258108
hsa-piR-13152	5.69468	-0.337625	0.298648	-1.13051	0.258261	0.824948
hsa-piR-6595	1.03317	0.556279	0.492073	1.13048	0.258274
hsa-piR-29595	0.366399	-1.02928	0.91102	-1.12981	0.258556
hsa-piR-16027	0.704634	-0.614673	0.544171	-1.12956	0.258663
hsa-piR-11986	0.367958	-0.810155	0.717472	-1.12918	0.258822
hsa-piR-20678	0.753602	-0.65302	0.578371	-1.12907	0.25887
hsa-piR-3226	15.1982	0.30043	0.26691	1.12559	0.26034	0.825391
hsa-piR-8163	1.75769	0.49215	0.437317	1.12539	0.260425
hsa-piR-33012	6.51872	-0.352073	0.312885	-1.12525	0.260484	0.825391
hsa-piR-6145	1.107	-0.558265	0.496149	-1.1252	0.260506
hsa-piR-8356	0.409572	0.74419	0.661992	1.12417	0.260942
hsa-piR-22107	5.05098	0.312375	0.277892	1.12409	0.260977	0.825391
hsa-piR-9670	19.3851	-0.269146	0.239493	-1.12382	0.261091	0.825391
LSU-rRNA_Hsa_dup11_seq_954	0.645783	-0.680743	0.605855	-1.12361	0.26118
hsa-piR-23206	12.9201	0.2709	0.241337	1.1225	0.26165	0.825391
hsa-piR-6714	0.671141	0.76007	0.677651	1.12162	0.262022
hsa-piR-18432	6.40095	-0.323082	0.288106	-1.1214	0.262117	0.825391
hsa-piR-7622	1.17183	-0.508849	0.454112	-1.12054	0.262486
hsa-piR-1598	0.374856	0.907925	0.810552	1.12013	0.262658
hsa-piR-4455	5.57026	-0.31394	0.280429	-1.1195	0.262927	0.825987
hsa-piR-10518	2.16565	-0.40019	0.357599	-1.1191	0.263097
hsa-piR-2396	0.769026	-0.6179	0.552587	-1.1182	0.263483
hsa-piR-12660	7.46929	0.382936	0.343075	1.11619	0.264341	0.826152
hsa-piR-14960	0.720542	-0.55925	0.501316	-1.11556	0.264609
hsa-piR-29137	1.66736	-0.419903	0.37659	-1.11501	0.264844
hsa-piR-19964	4.84861	-0.299739	0.268891	-1.11472	0.26497	0.826152
hsa-piR-26386	11.6631	0.283134	0.254032	1.11456	0.265039	0.826152
hsa-piR-33197	0.446907	-0.792949	0.712019	-1.11366	0.265424
hsa-piR-7463	6.68559	0.363032	0.326239	1.11278	0.265803	0.826152
hsa-piR-972	0.553616	-0.619197	0.556564	-1.11254	0.265908
5S_dup47_seq_964	0.591152	-0.626752	0.564067	-1.11113	0.266512
hsa-piR-17259	18.3324	-0.222711	0.200517	-1.11068	0.266704	0.826152
hsa-piR-9487	2.55866	-0.367627	0.331395	-1.10933	0.267288
hsa-piR-30917	0.563785	-0.755166	0.681074	-1.10879	0.267522
hsa-piR-12470	1.81446	-0.386436	0.348529	-1.10876	0.267533
5S_seq_1081	0.954169	-0.604113	0.545112	-1.10824	0.26776
hsa-piR-13156	17.3872	-0.229242	0.207077	-1.10704	0.268277	0.826152
hsa-piR-14832	0.931786	-0.484363	0.437792	-1.10638	0.268563
hsa-piR-25268	1.00981	-0.53783	0.486649	-1.10517	0.269086
hsa-piR-33016	32.5467	0.259512	0.234843	1.10504	0.26914	0.826152
hsa-piR-27007	1.39727	-0.462559	0.41916	-1.10354	0.269794
hsa-miR-425-3p	3.28786	0.327953	0.297218	1.10341	0.26985
hsa-piR-2811	0.368697	-0.831692	0.754373	-1.10249	0.270247
hsa-piR-24380	0.730221	0.685611	0.621958	1.10234	0.270312
hsa-piR-21219	0.886729	-0.501608	0.455061	-1.10229	0.270336
hsa-piR-6162	5.92262	-0.279451	0.253545	-1.10218	0.270384	0.826152
hsa-miR-20b-5p	16.256	0.301276	0.273358	1.10213	0.270405	0.826152
hsa-piR-8214	1.89712	-0.440299	0.399779	-1.10136	0.270741
hsa-piR-29077	0.624579	-0.638835	0.580493	-1.1005	0.271113
hsa-piR-8920	4.7632	0.325642	0.296162	1.09954	0.271531	0.826152
hsa-piR-19260	1.1457	0.586383	0.533328	1.09948	0.271559
hsa-piR-16846	0.596398	-0.663039	0.60312	-1.09935	0.271617
hsa-piR-26365	4.88894	-0.304442	0.276991	-1.0991	0.271723	0.826152
hsa-piR-19474	5.60158	0.253031	0.230226	1.09906	0.271744	0.826152
hsa-piR-5501	6.093	-0.278056	0.253279	-1.09782	0.272281	0.826152
hsa-piR-1966	5.36344	-0.330006	0.300623	-1.09774	0.272318	0.826152
hsa-piR-6153	2.14597	0.399768	0.364463	1.09687	0.272698
hsa-piR-942	4.91349	0.316323	0.28855	1.09625	0.272969	0.826152
hsa-piR-1725	0.836901	-0.546258	0.498864	-1.095	0.273515
hsa-piR-2050	2.6031	0.429164	0.391932	1.095	0.273518
hsa-piR-32139	0.734178	-0.599899	0.547893	-1.09492	0.273552
hsa-piR-27122	7.57901	0.278616	0.254642	1.09415	0.273891	0.826152
hsa-piR-12763	4.19634	0.344121	0.314517	1.09412	0.273901	0.826152
hsa-piR-20192	2.90366	-0.393853	0.360023	-1.09397	0.273969
hsa-piR-20108	2.01123	0.404562	0.369912	1.09367	0.2741
5S_dup28_seq_481	16.3134	0.252953	0.23131	1.09357	0.274143	0.826152
hsa-piR-1568	0.715613	-0.661757	0.605497	-1.09291	0.274431
hsa-piR-27519	1.66299	-0.438571	0.40142	-1.09255	0.274591
hsa-piR-4997	0.486667	-0.730378	0.669077	-1.09162	0.274999
hsa-piR-32955	5.02535	0.383841	0.35225	1.08969	0.275852	0.829424
hsa-miR-342-5p	0.424607	0.834221	0.767206	1.08735	0.276882
tRNA-Glu-TTC-9-1	19967.3	-0.193927	0.178515	-1.08634	0.27733	0.830763
hsa-piR-26332	13.2128	0.237423	0.218652	1.08585	0.277545	0.830763
LSU-rRNA_Hsa_dup18_seq_1559	0.465329	-0.743018	0.684559	-1.0854	0.277746
hsa-piR-5376	0.640288	-0.646023	0.595642	-1.08458	0.278106
hsa-piR-24770	1.0161	0.572773	0.528106	1.08458	0.278108
hsa-miR-520a-3p	0.288237	-0.922502	0.85141	-1.0835	0.278587
5S_dup79_seq_1005	1.16092	0.646724	0.597902	1.08165	0.279406
hsa-piR-27133	9.45885	-0.286569	0.26524	-1.08041	0.279959	0.834323
hsa-piR-31516	0.62743	-0.661061	0.61187	-1.08039	0.279967
hsa-piR-378	11.923	0.26909	0.249077	1.08035	0.279987	0.834323
hsa-piR-13208	0.295225	-0.850144	0.787104	-1.08009	0.280102
hsa-piR-26495	1.45109	-0.405541	0.375495	-1.08002	0.280134
hsa-piR-19737	1.39462	-0.466793	0.432769	-1.07862	0.280757
hsa-miR-148b-3p	4.79682	-0.356118	0.330506	-1.07749	0.28126	0.836246
hsa-miR-330-3p	0.827831	0.634701	0.589458	1.07675	0.28159
hsa-piR-6085	1.62638	-0.403196	0.374828	-1.07568	0.282069
hsa-piR-4914	7.35144	-0.260568	0.242263	-1.07556	0.282123	0.836945
hsa-piR-20760	0.684449	-0.743383	0.691165	-1.07555	0.282129
hsa-piR-31433	1.84333	-0.414064	0.385573	-1.07389	0.282871
tRNA-Phe-GAA-3-1	1.2623	-0.430994	0.401602	-1.07319	0.283187
hsa-piR-14795	1.04013	0.491747	0.458326	1.07292	0.283308
hsa-piR-5350	5.84817	0.304663	0.284173	1.0721	0.283673	0.83851
hsa-piR-17754	4.98059	-0.303378	0.283268	-1.07099	0.284174	0.83851
hsa-piR-24746	0.450311	0.763181	0.712788	1.0707	0.284305
hsa-miR-12136	2052.56	0.178903	0.167382	1.06883	0.285146	0.83851
hsa-piR-30600	1.8527	0.398038	0.372419	1.06879	0.285163
hsa-piR-13379	0.966618	0.584053	0.546463	1.06879	0.285165
5S_dup35_seq_946	34.0909	0.310309	0.290339	1.06878	0.285169	0.83851
tRNA-Ile-AAT-8-1	2.68702	-0.365147	0.341685	-1.06867	0.28522
hsa-piR-20820	0.339905	-0.884118	0.82755	-1.06836	0.28536
hsa-piR-20562	1.4882	0.532075	0.498404	1.06756	0.28572
hsa-piR-9142	2.13684	0.415808	0.390024	1.06611	0.286375
LSU-rRNA_Hsa_dup3_seq_163	1.4622	-0.438867	0.411742	-1.06588	0.286478
hsa-piR-899	1.40586	-0.438574	0.411657	-1.06539	0.286701
hsa-piR-9560	2.04547	0.432271	0.406008	1.06469	0.287018
hsa-piR-499	0.489479	0.781604	0.734391	1.06429	0.287197
hsa-piR-32969	0.710786	0.64787	0.60876	1.06424	0.287218
hsa-miR-891a-5p	7.1397	-0.276799	0.260179	-1.06388	0.287383	0.84225
hsa-piR-27510	0.526958	-0.69268	0.651437	-1.06331	0.287641
hsa-piR-25350	2.98259	-0.332713	0.312918	-1.06326	0.287665
hsa-piR-12151	2.97036	-0.360594	0.339273	-1.06284	0.287853
hsa-miR-375-3p	29.9866	0.218061	0.205315	1.06208	0.2882	0.84225
hsa-piR-31530	0.549523	-0.634141	0.598149	-1.06017	0.289066
hsa-piR-10968	3.38399	-0.381224	0.359596	-1.06015	0.289078
tRNA-Ile-AAT-12-1	1.07526	-0.513384	0.484448	-1.05973	0.289267
LSU-rRNA_Hsa_dup5_seq_588	0.966374	0.590363	0.55733	1.05927	0.289477
hsa-piR-18818	0.367338	0.872477	0.823942	1.05891	0.289642
hsa-miR-660-5p	16.1939	0.159237	0.150391	1.05882	0.289681	0.84225
hsa-piR-6202	2.95872	0.323703	0.305731	1.05878	0.289699
hsa-piR-9626	1.53511	-0.410046	0.387923	-1.05703	0.290498
5S_dup47_seq_1331	0.984371	0.673576	0.637447	1.05668	0.290659
hsa-piR-18019	0.797939	0.616106	0.583868	1.05521	0.291327
hsa-piR-29467	0.657483	-0.64874	0.615027	-1.05482	0.29151
hsa-piR-33111	3.23719	0.396708	0.376229	1.05443	0.291685
hsa-piR-21062	0.651192	-0.660981	0.627052	-1.05411	0.291833
hsa-piR-29988	1.63039	0.459796	0.436587	1.05316	0.292268
hsa-piR-9680	47.2365	-0.196081	0.186341	-1.05227	0.292677	0.84225
hsa-piR-27561	3.10588	-0.350395	0.333322	-1.05122	0.293158
hsa-piR-5046	1.49244	0.465462	0.442836	1.05109	0.293216
hsa-piR-5216	0.545783	0.723871	0.688741	1.05101	0.293256
hsa-piR-16990	0.815819	0.683186	0.650084	1.05092	0.293295
hsa-piR-5101	0.464772	0.699667	0.666118	1.05037	0.29355
hsa-piR-29740	8.89502	0.290239	0.276403	1.05006	0.293692	0.84225
hsa-piR-262	2.29316	0.403494	0.384272	1.05002	0.293707
tRNA-Ser-TGA-1-1	24.0428	-0.180622	0.172056	-1.04979	0.293815	0.84225
hsa-piR-33046	4770.76	-0.180321	0.171866	-1.0492	0.294086	0.84225
hsa-piR-2566	0.367775	-0.89798	0.856284	-1.04869	0.294319
hsa-piR-16675	4.28647	-0.320976	0.306111	-1.04856	0.29438	0.84225
hsa-piR-32892	0.217386	-1.18637	1.13146	-1.04853	0.294396
hsa-piR-15536	3.73742	-0.331416	0.316307	-1.04777	0.294746
hsa-piR-25006	0.521392	0.797209	0.760959	1.04764	0.294806
hsa-piR-30323	0.900614	-0.48772	0.465633	-1.04743	0.2949
hsa-piR-22287	22.5182	-0.220365	0.210547	-1.04663	0.29527	0.84225
hsa-piR-17143	0.213504	-1.085	1.03706	-1.04623	0.295457
hsa-piR-29484	0.563964	-0.709882	0.678614	-1.04608	0.295526
hsa-miR-582-3p	1.11097	-0.660278	0.631317	-1.04587	0.295619
hsa-piR-5630	0.760872	-0.626774	0.600762	-1.0433	0.29681
hsa-piR-8319	1.74056	-0.41079	0.393761	-1.04325	0.296834
hsa-piR-13509	0.721281	0.569049	0.545793	1.04261	0.297129
hsa-piR-10735	1.76	0.441285	0.423504	1.04199	0.297418
hsa-piR-30781	2.3301	-0.363042	0.348462	-1.04184	0.297486
hsa-piR-2036	0.656071	0.740036	0.710472	1.04161	0.297592
hsa-piR-9971	0.394243	0.781037	0.749845	1.0416	0.297598
hsa-miR-17-3p	0.600905	-0.659092	0.632976	-1.04126	0.297755
hsa-piR-15308	9.08989	0.281036	0.270056	1.04066	0.298034	0.84225
hsa-piR-7628	0.263954	-1.05284	1.01181	-1.04055	0.298084
hsa-piR-2561	3.15092	-0.362274	0.348206	-1.0404	0.298153
5S_dup14_seq_375	1.32912	0.527723	0.507277	1.04031	0.298198
hsa-piR-27148	2.2693	0.373261	0.359117	1.03938	0.298626
hsa-piR-30270	0.659223	-0.593131	0.570797	-1.03913	0.298745
hsa-piR-1184	4.40721	-0.358781	0.345413	-1.0387	0.298944	0.84225
hsa-piR-9713	5.97095	-0.25568	0.246223	-1.03841	0.29908	0.84225
hsa-piR-1150	7.6574	0.298215	0.287302	1.03798	0.299278	0.84225
hsa-piR-30734	0.859425	-0.540985	0.521575	-1.03721	0.299636
hsa-piR-17943	0.72955	0.580738	0.559951	1.03712	0.299678
hsa-miR-628-3p	1.31479	-0.427629	0.412376	-1.03699	0.299741
hsa-piR-26670	4.37797	-0.30506	0.29434	-1.03642	0.300006	0.84225
5S_dup87_seq_110	1.12697	-0.547468	0.528294	-1.03629	0.300065
hsa-piR-28817	0.509526	0.701987	0.677515	1.03612	0.300146
hsa-piR-30924	28.7374	-0.226326	0.218574	-1.03547	0.300451	0.84225
tRNA-Asp-GTC-2-11	609.194	-0.14595	0.141072	-1.03458	0.300867	0.84225
hsa-piR-11232	1.3947	-0.915649	0.885147	-1.03446	0.300921
LSU-rRNA_Hsa_dup11_seq_434	0.472238	-0.683746	0.661005	-1.0344	0.300947
hsa-miR-887-5p	2.6322	0.345382	0.334192	1.03348	0.301377
hsa-piR-6444	1.01065	0.550896	0.533308	1.03298	0.301614
hsa-piR-19947	8.52322	0.279087	0.270446	1.03195	0.302096	0.84225
hsa-piR-4103	0.904309	-0.50949	0.493893	-1.03158	0.302269
hsa-piR-5795	0.298387	0.903672	0.876247	1.0313	0.302401
hsa-piR-11108	0.660082	-0.589847	0.572092	-1.03104	0.302524
hsa-piR-22391	0.306049	-0.955234	0.926933	-1.03053	0.30276
tRNA-Ile-TAT-2-3	9.51162	-0.265144	0.257436	-1.02994	0.303037	0.84225
hsa-piR-24690	6.47699	-0.264585	0.256952	-1.02971	0.303147	0.84225
hsa-piR-29326	2.26668	0.455178	0.442131	1.02951	0.30324
hsa-piR-23197	14.5103	0.218296	0.212224	1.02861	0.303663	0.84225
hsa-miR-23a-3p	8.28891	0.368924	0.358917	1.02788	0.304005	0.84225
hsa-piR-23289	26.438	-0.212106	0.206364	-1.02783	0.30403	0.84225
tRNA-Gly-GCC-6-1	6.71442	-0.259905	0.252982	-1.02737	0.304248	0.84225
5S_dup35_seq_49	0.568379	-0.631475	0.614697	-1.02729	0.304282
hsa-piR-32886	10.1285	0.241904	0.235714	1.02626	0.304769	0.84225
hsa-piR-2404	13.3659	-0.256302	0.249853	-1.02581	0.304979	0.84225
hsa-piR-25371	3.10823	-0.31765	0.309907	-1.02499	0.30537
hsa-piR-32985	110.865	-0.173878	0.169653	-1.02491	0.305407	0.84225
5S_dup11_seq_150	0.773519	-0.509657	0.497634	-1.02416	0.30576
hsa-piR-10025	0.237234	-0.844977	0.825717	-1.02333	0.306154
hsa-piR-22472	5.84374	-0.258718	0.252919	-1.02293	0.306343	0.84225
hsa-miR-363-3p	132.486	0.258102	0.252506	1.02216	0.306705	0.84225
hsa-piR-19037	0.786617	-0.550785	0.539011	-1.02184	0.306856
hsa-piR-26705	0.390546	0.809639	0.792369	1.0218	0.306878
hsa-piR-24384	0.287586	1.031	1.00905	1.02176	0.306895
hsa-miR-127-3p	3.91021	0.383403	0.375361	1.02143	0.307052	0.84225
hsa-piR-26857	0.382656	0.75564	0.740289	1.02074	0.307379
hsa-piR-10407	1.1968	-0.455259	0.446112	-1.0205	0.30749
hsa-piR-19524	4.12078	-0.302296	0.296987	-1.01788	0.308737	0.84225
5S_dup45_seq_196	2.82192	0.402741	0.395668	1.01788	0.308737
hsa-piR-28235	1.91816	-0.408061	0.400909	-1.01784	0.308754
5S_dup22_seq_1512	0.855527	0.565617	0.55619	1.01695	0.309178
hsa-piR-27304	4.10745	0.335431	0.330029	1.01637	0.309454	0.84225
hsa-piR-16800	2.89668	-0.349498	0.34394	-1.01616	0.309553
hsa-piR-20395	0.292495	-0.83777	0.824531	-1.01606	0.309603
tRNA-Gly-TCC-4-1	13.6242	-0.279658	0.275536	-1.01496	0.310125	0.84225
tRNA-Asp-GTC-10-1	0.597787	-0.698473	0.688567	-1.01439	0.310398
5S_dup26_seq_479	9.52116	-0.292047	0.287966	-1.01417	0.310502	0.84225
tRNA-Met-CAT-6-1	15.1458	-0.185821	0.183265	-1.01394	0.310609	0.84225
hsa-piR-22288	2.79539	-0.350189	0.3461	-1.01182	0.311626
tRNA-Gly-CCC-7-1	57.637	0.276141	0.272976	1.0116	0.311731	0.84225
hsa-piR-17101	16.0965	-0.220143	0.217676	-1.01133	0.311858	0.84225
5S_dup127_seq_136	0.448804	-0.646937	0.639888	-1.01102	0.312009
hsa-piR-13429	3.25487	0.309421	0.30626	1.01032	0.312342
hsa-piR-32157	55.9189	0.375288	0.371634	1.00983	0.312575	0.84225
hsa-miR-101-3p	8.31055	0.200349	0.198452	1.00956	0.312707	0.84225
hsa-piR-21182	0.225855	-1.19448	1.18371	-1.0091	0.312927
hsa-piR-26790	3.91707	-0.305372	0.302707	-1.00881	0.313068	0.84225
hsa-piR-13732	9.45676	-0.239138	0.237061	-1.00876	0.31309	0.84225
hsa-miR-106a-5p	35.9176	0.234185	0.232321	1.00803	0.313442	0.84225
hsa-piR-13493	1.48073	-0.400413	0.397375	-1.00765	0.313624
hsa-piR-5306	8.78824	0.258476	0.256607	1.00728	0.3138	0.84225
hsa-miR-1291	2.66949	0.333289	0.331001	1.00691	0.313976
hsa-piR-11231	0.307691	-1.07371	1.06656	-1.00671	0.314075
hsa-piR-17819	12.7596	0.278968	0.277117	1.00668	0.314089	0.84225
hsa-piR-8631	5.98585	-0.2399	0.238473	-1.00598	0.314423	0.84225
5S_dup51_seq_1544	1.55196	0.739451	0.735073	1.00596	0.314437
hsa-piR-18252	2.83974	0.324449	0.322618	1.00568	0.31457
hsa-piR-281	2.25144	-0.363294	0.361403	-1.00523	0.314786
hsa-piR-17609	5.90905	0.300165	0.298671	1.005	0.314895	0.84225
hsa-piR-9043	1.81495	-0.380308	0.37868	-1.0043	0.315234
hsa-piR-27738	1.1223	0.567673	0.565289	1.00422	0.315274
hsa-piR-25933	0.671759	-0.560553	0.558498	-1.00368	0.315533
hsa-piR-12313	0.404658	-0.687054	0.685032	-1.00295	0.315884
hsa-piR-8397	0.305658	-0.825943	0.823644	-1.00279	0.315961
5S_dup7_seq_452	1.33515	0.488496	0.487172	1.00272	0.315997
hsa-miR-552-3p	0.38251	-0.765768	0.7638	-1.00258	0.316065
hsa-miR-95-3p	1.12417	-0.440635	0.440448	-1.00042	0.317106
hsa-piR-664	1.28854	-0.417026	0.417172	-0.99965	0.31748
hsa-piR-20566	0.20897	-1.00124	1.00245	-0.99879	0.317897
hsa-piR-8618	4.29474	0.298828	0.299221	0.998685	0.317947	0.845778
hsa-piR-27381	7.73315	-0.256441	0.256808	-0.99857	0.318003	0.845778
LSU-rRNA_Hsa_dup9_seq_175	1.47019	0.417882	0.418565	0.998368	0.318101
hsa-piR-9955	1.09992	0.472388	0.473213	0.998257	0.318155
hsa-piR-17444	10.5073	0.272392	0.272876	0.998226	0.31817	0.845778
tRNA-Cys-GCA-9-3	10.9664	-0.311439	0.312369	-0.997021	0.318754	0.845778
tRNA-Val-TAC-4-1	1.57007	-0.386651	0.388067	-0.99635	0.31908
hsa-miR-147b-5p	0.444901	-0.60816	0.6113	-0.994863	0.319803
hsa-piR-11033	0.416301	0.806065	0.810237	0.994851	0.319809
hsa-piR-24356	2.82774	0.372055	0.374076	0.994598	0.319932
hsa-piR-9939	0.875822	0.51913	0.522227	0.99407	0.320189
hsa-piR-27840	0.38997	-0.709689	0.713933	-0.994055	0.320196
hsa-piR-5919	1.11669	0.47003	0.472874	0.993986	0.32023
hsa-piR-10187	1.88873	-0.393411	0.395819	-0.993916	0.320264
tRNA-Leu-TAG-3-1	94.3776	0.130199	0.131001	0.993877	0.320283	0.846079
hsa-piR-29171	1.73865	-0.396347	0.398876	-0.99366	0.320388
tRNA-Lys-TTT-13-1	25.4821	-0.258631	0.260386	-0.993259	0.320584	0.846079
hsa-piR-2086	0.677421	-0.517906	0.521421	-0.993259	0.320584
hsa-piR-29118	19.8305	-0.20571	0.207292	-0.992367	0.321018	0.846079
hsa-piR-20245	0.204193	-1.08618	1.09534	-0.991635	0.321376
5S_dup34_seq_180	0.808301	-0.471817	0.475936	-0.991346	0.321517
hsa-piR-10847	0.752763	0.573241	0.578634	0.99068	0.321842
tRNA-Arg-TCG-3-1	25.7751	0.318635	0.321689	0.990506	0.321927	0.846079
hsa-miR-223-3p	8.3306	0.476105	0.480784	0.990267	0.322043	0.846079
hsa-piR-29221	0.257946	-0.907428	0.9183	-0.988161	0.323074
hsa-piR-11194	0.3004	-0.879801	0.890344	-0.988159	0.323075
hsa-piR-23965	2.42172	0.352865	0.357215	0.987822	0.32324
hsa-piR-30086	2.30697	0.379189	0.383978	0.98753	0.323383
hsa-piR-3399	7.1134	-0.277209	0.280733	-0.987449	0.323422	0.846319
hsa-piR-10627	1.81441	0.389861	0.394966	0.987075	0.323606
hsa-piR-13548	0.82972	-0.505483	0.512495	-0.986319	0.323977
hsa-piR-26723	11.1813	-0.235827	0.239182	-0.985972	0.324147	0.846319
hsa-piR-25697	3.17388	-0.315292	0.319905	-0.985579	0.32434
hsa-piR-27636	2.61705	0.386696	0.392391	0.985486	0.324385
LSU-rRNA_Hsa_dup10_seq_179	357.823	-0.202626	0.205674	-0.985182	0.324534	0.846319
hsa-piR-30141	3.73242	-0.33103	0.336072	-0.984996	0.324626
hsa-piR-1262	0.587181	-0.579266	0.588092	-0.984992	0.324628
5S_dup54_seq_1338	11.8619	0.285945	0.290331	0.984893	0.324676	0.846319
hsa-piR-4812	1.82363	-0.371765	0.377495	-0.984821	0.324712
hsa-piR-31635	0.308017	-0.822468	0.835339	-0.984592	0.324824
hsa-piR-12431	1.8377	-0.399359	0.405866	-0.983967	0.325132
hsa-piR-24596	0.467132	-0.701852	0.71438	-0.982463	0.325872
hsa-piR-3000	0.635329	0.62861	0.639941	0.982293	0.325956
hsa-piR-28757	2.93915	-0.301636	0.307581	-0.980671	0.326755
hsa-piR-4802	4.06718	0.305972	0.312306	0.979717	0.327226	0.848163
hsa-piR-7422	4.22889	-0.30373	0.310026	-0.97969	0.327239	0.848163
hsa-piR-1828	14.1766	0.229433	0.234216	0.979579	0.327294	0.848163
hsa-piR-15267	3.48664	-0.280827	0.286783	-0.97923	0.327466
hsa-piR-11516	2.22449	-0.350994	0.358738	-0.978411	0.327871
hsa-let-7a-5p	221.769	0.156818	0.16035	0.977969	0.32809	0.848574
hsa-piR-31285	3.34474	-0.316854	0.324237	-0.977229	0.328456
hsa-piR-19346	4.0914	0.286229	0.293069	0.976659	0.328738	0.848603
hsa-piR-25744	0.449351	-0.718764	0.73603	-0.976542	0.328796
hsa-piR-23398	0.281277	-0.946939	0.969972	-0.976254	0.328939
hsa-piR-11265	0.245665	-1.04172	1.06785	-0.975533	0.329296
hsa-piR-32995	0.577803	-0.630211	0.64614	-0.975347	0.329388
hsa-piR-15355	0.287626	-0.833809	0.855226	-0.974958	0.329581
LSU-rRNA_Hsa_dup11_seq_1048	6.52444	-0.213797	0.219433	-0.974315	0.3299	0.849956
hsa-piR-25024	3.44849	0.299748	0.307809	0.973811	0.330151
hsa-piR-22394	4.78096	-0.31369	0.32245	-0.972832	0.330637	0.850098
hsa-piR-16448	0.408066	-0.781894	0.804175	-0.972293	0.330905
hsa-piR-22449	0.473301	-0.621459	0.639716	-0.971461	0.331319
hsa-piR-17526	1.00748	0.51466	0.529837	0.971355	0.331371
hsa-piR-31827	8.57324	0.221829	0.228514	0.970745	0.331675	0.850098
tRNA-Asn-GTT-5-1	4.40204	0.302927	0.312195	0.970315	0.33189	0.850098
hsa-piR-12808	1.03087	-0.527651	0.543874	-0.970171	0.331961
hsa-piR-27170	0.567267	0.660774	0.681474	0.969624	0.332234
hsa-piR-16743	0.533159	-0.618296	0.6377	-0.969571	0.33226
hsa-piR-797	0.562179	-0.591724	0.61033	-0.969515	0.332289
hsa-piR-28789	0.421654	0.739284	0.762538	0.969505	0.332293
hsa-piR-19726	4.73117	-0.251832	0.259869	-0.969074	0.332508	0.850098
hsa-piR-7610	2.47317	0.331907	0.343126	0.967304	0.333392
hsa-piR-31002	1.46771	-0.425737	0.440237	-0.967063	0.333513
hsa-piR-10490	17.9356	-0.223461	0.231074	-0.967053	0.333518	0.850541
hsa-piR-8018	2.29954	-0.33608	0.347732	-0.966492	0.333798
hsa-piR-5924	1.06001	-0.440903	0.456219	-0.966429	0.33383
hsa-piR-29639	17.1036	-0.239032	0.247401	-0.966171	0.333959	0.850541
hsa-piR-15419	0.360988	0.752733	0.781246	0.963503	0.335295
hsa-miR-15b-3p	0.449415	-0.683684	0.709653	-0.963407	0.335343
hsa-piR-23839	3.23242	0.313737	0.325706	0.963252	0.335421
hsa-piR-28359	1.15685	0.47713	0.495477	0.96297	0.335563
hsa-piR-2147	12.9509	0.202133	0.20992	0.962908	0.335594	0.852889
hsa-piR-682	1.95281	0.396198	0.412087	0.961442	0.33633
hsa-piR-4803	1.81428	-0.370882	0.385852	-0.961203	0.33645
hsa-piR-32186	91.2746	0.251248	0.261413	0.961115	0.336494	0.852889
tRNA-Thr-CGT-4-1	5.12624	0.270825	0.281961	0.960504	0.336802	0.852889
hsa-piR-31884	1.33534	-0.430121	0.448862	-0.958247	0.337938
hsa-piR-5124	0.267368	-0.917273	0.957455	-0.958032	0.338047
hsa-piR-18027	0.528307	0.680283	0.710162	0.957927	0.338099
hsa-piR-28804	0.297821	-0.992846	1.03673	-0.957673	0.338228
hsa-piR-23104	3.74875	-0.306442	0.320039	-0.957516	0.338307
hsa-piR-7990	2.51025	0.3918	0.409211	0.957451	0.33834
hsa-piR-27280	0.305803	0.773968	0.808787	0.956949	0.338593
hsa-piR-26914	2.15879	-0.335772	0.351004	-0.956605	0.338766
hsa-piR-29471	9.47474	-0.251415	0.26287	-0.956424	0.338858	0.854144
hsa-piR-30102	0.821642	-0.546725	0.571657	-0.956386	0.338877
hsa-piR-28146	2.18242	0.346627	0.362521	0.956156	0.338994
hsa-piR-4122	1.98443	0.38429	0.401915	0.956147	0.338998
hsa-piR-18261	0.290322	0.84302	0.882562	0.955197	0.339478
hsa-piR-17149	0.352879	-0.676369	0.708487	-0.954666	0.339747
hsa-piR-7641	9.69882	-0.237725	0.249171	-0.954064	0.340051	0.854144
hsa-piR-14017	5.91955	-0.272055	0.285194	-0.95393	0.340119	0.854144
hsa-piR-7857	0.606451	0.636164	0.667178	0.953515	0.340329
hsa-piR-29272	3.88796	-0.309577	0.32486	-0.952956	0.340613	0.854144
hsa-piR-31450	4.57321	-0.264576	0.277746	-0.952584	0.340801	0.854144
hsa-piR-8395	0.86125	0.547161	0.574436	0.952519	0.340834
hsa-piR-7855	1.70977	-0.333181	0.349815	-0.952449	0.340869
hsa-piR-11856	0.693208	-0.566441	0.594888	-0.95218	0.341006
hsa-piR-26758	3.10804	0.418146	0.439208	0.952046	0.341074
hsa-piR-8051	2.29588	0.379727	0.398971	0.951765	0.341216
hsa-piR-13593	0.552029	-0.728333	0.765304	-0.951691	0.341254
hsa-piR-31320	4.5868	-0.251147	0.264092	-0.950984	0.341613	0.854144
hsa-miR-26b-3p	0.275876	-0.756302	0.795645	-0.950553	0.341831
hsa-piR-828	0.372526	-0.604484	0.636617	-0.949525	0.342354
hsa-piR-3564	3.0903	-0.325475	0.343271	-0.948159	0.343049
hsa-piR-19877	0.375149	-0.708269	0.747094	-0.948033	0.343113
hsa-piR-18770	0.575431	-0.569627	0.600971	-0.947845	0.343208
hsa-piR-1628	0.815558	-0.492437	0.519687	-0.947564	0.343351
hsa-piR-16235	1.18435	-0.418415	0.441991	-0.94666	0.343812
hsa-miR-221-5p	6.19334	0.2915	0.308024	0.946356	0.343967	0.854144
hsa-piR-9607	0.446457	0.717384	0.758414	0.9459	0.3442
hsa-piR-2822	0.693089	0.600063	0.634753	0.945349	0.344481
hsa-piR-29899	5.56274	-0.280066	0.296279	-0.945276	0.344518	0.854144
hsa-piR-24977	6.82028	-0.25627	0.271115	-0.945244	0.344534	0.854144
tRNA-Ile-AAT-9-1	0.266994	-1.1178	1.18288	-0.944981	0.344669
hsa-piR-28190	4.73094	-0.274727	0.290781	-0.944789	0.344766	0.854144
hsa-piR-22974	1.2573	-0.438969	0.464683	-0.944665	0.34483
hsa-piR-5792	1.86202	-0.361599	0.382785	-0.944655	0.344835
hsa-piR-23277	0.841025	-0.501633	0.531146	-0.944435	0.344947
hsa-piR-4039	0.775721	-0.50986	0.539913	-0.944337	0.344998
LSU-rRNA_Hsa_dup1_seq_412	5.85516	-0.26378	0.279413	-0.94405	0.345144	0.854144
tRNA-Pro-TGG-4-1	20.8038	0.407324	0.431796	0.943327	0.345514	0.854144
hsa-piR-18198	0.222276	-0.940082	0.996605	-0.943285	0.345535
hsa-piR-15098	4.20974	0.288261	0.305655	0.943093	0.345633	0.854144
hsa-piR-4096	2.02659	0.343216	0.364059	0.942747	0.34581
hsa-miR-221-3p	10.2054	0.312883	0.332524	0.940932	0.34674	0.855291
hsa-piR-23408	0.724305	0.593944	0.631252	0.940898	0.346757
hsa-piR-29303	3.84652	0.348465	0.370485	0.940563	0.346929
hsa-piR-1346	0.176022	-1.33428	1.41911	-0.940221	0.347104
hsa-piR-10294	1.10141	-0.43405	0.461779	-0.939951	0.347243
hsa-piR-3460	0.294129	-0.851981	0.906737	-0.939612	0.347416
hsa-piR-19001	2.39212	-0.292139	0.310942	-0.939528	0.34746
5S_dup31_seq_397	4.05995	-0.289561	0.308252	-0.939366	0.347543	0.855687
hsa-piR-2279	0.618626	-0.564496	0.601422	-0.938601	0.347936
hsa-miR-873-3p	1.28958	-0.37008	0.39433	-0.938502	0.347986
LSU-rRNA_Hsa_dup23_seq_1256	38.9512	-0.187271	0.199767	-0.937449	0.348528	0.856529
hsa-piR-13447	2.47589	0.319773	0.341276	0.936992	0.348763
hsa-piR-7260	1.47565	0.417518	0.445665	0.936844	0.348839
hsa-piR-4849	0.567924	0.548135	0.585306	0.936492	0.34902
hsa-piR-14086	0.303819	-0.892595	0.953735	-0.935895	0.349327
hsa-piR-10951	2.03438	-0.384512	0.410874	-0.93584	0.349356
hsa-piR-7850	8.10478	0.284938	0.305063	0.934027	0.35029	0.859275
hsa-piR-14905	0.36045	0.788931	0.84518	0.933448	0.350589
hsa-piR-11867	0.279321	-0.964228	1.03341	-0.933059	0.35079
hsa-piR-5791	5.48209	0.249339	0.267569	0.931867	0.351405	0.860426
hsa-miR-5683	1.84871	-0.431209	0.462858	-0.931623	0.351531
hsa-piR-10528	0.296893	-0.812949	0.872633	-0.931604	0.351541
hsa-piR-813	0.456519	-0.651835	0.699842	-0.931403	0.351645
hsa-piR-31732	0.843769	-0.433196	0.465278	-0.931048	0.351829
hsa-miR-500a-3p	1.81251	-0.378595	0.406941	-0.930342	0.352194
hsa-piR-5486	0.892769	-0.537815	0.578457	-0.92974	0.352506
hsa-piR-3050	2.74633	-0.286683	0.30837	-0.929672	0.352541
hsa-piR-15882	2.39098	-0.316532	0.340514	-0.929569	0.352594
hsa-piR-13825	1.87265	-0.34306	0.369113	-0.929418	0.352672
hsa-piR-29208	0.696679	0.639698	0.688344	0.929329	0.352719
hsa-piR-32935	0.546093	-0.534538	0.575415	-0.92896	0.35291
hsa-piR-27390	22.5137	0.209988	0.226135	0.928598	0.353098	0.862984
hsa-piR-5361	2.68867	0.307786	0.331539	0.928355	0.353223
hsa-piR-25254	1.87344	0.372459	0.401216	0.928326	0.353239
hsa-piR-26137	0.944721	-0.477007	0.51391	-0.928192	0.353308
hsa-piR-12639	1.43254	-0.39276	0.423421	-0.927589	0.353621
hsa-piR-3884	0.732138	-0.627667	0.676666	-0.927587	0.353622
hsa-piR-4857	1.41813	-0.373403	0.402606	-0.927466	0.353685
hsa-piR-25001	3.43138	-0.300538	0.324263	-0.926835	0.354012
hsa-miR-429	0.457019	0.712264	0.769326	0.925829	0.354535
hsa-piR-15723	0.345392	-0.798144	0.862219	-0.925686	0.354609
hsa-miR-205-5p	13.0329	-0.277088	0.299448	-0.925329	0.354795	0.865103
hsa-piR-31023	2.33914	0.371951	0.402011	0.925226	0.354849
hsa-piR-7581	0.558973	-0.575973	0.622523	-0.925224	0.354849
hsa-piR-23888	0.556371	0.600405	0.649066	0.925029	0.354951
5S_dup76_seq_569	0.505657	0.852553	0.921816	0.924862	0.355038
hsa-piR-26818	0.319835	0.749869	0.811008	0.924614	0.355167
hsa-piR-10917	0.682931	-0.529849	0.573618	-0.923696	0.355645
hsa-piR-29119	0.734607	-0.508993	0.551567	-0.922814	0.356104
hsa-piR-26347	4.9012	-0.283144	0.30688	-0.922653	0.356188	0.865103
tRNA-Glu-TTC-5-1	1.14068	0.560169	0.607615	0.921915	0.356573
tRNA-Leu-TAA-2-1	57.1002	0.16279	0.176604	0.921783	0.356642	0.865103
hsa-piR-2656	0.606651	0.568278	0.617096	0.920892	0.357107
hsa-piR-29939	0.360116	-0.760707	0.82621	-0.920718	0.357197
hsa-miR-3617-5p	1.43521	0.500482	0.543757	0.920414	0.357356
5S_dup31_seq_45	10.6665	0.301817	0.327988	0.920208	0.357464	0.865103
hsa-miR-107	62.5713	0.271779	0.295446	0.919894	0.357628	0.865103
hsa-piR-30512	1.87188	0.435888	0.474001	0.919593	0.357785
hsa-piR-1946	3.43059	0.262234	0.285189	0.919509	0.35783
hsa-piR-2457	1.3552	-0.432014	0.46986	-0.919452	0.357859
hsa-piR-32460	12.791	-0.210873	0.229347	-0.919447	0.357862	0.865103
hsa-piR-374	0.555531	0.612243	0.666049	0.919215	0.357983
hsa-piR-6998	1.09737	0.447072	0.486674	0.918629	0.35829
hsa-piR-8653	1.77308	-0.404358	0.440554	-0.91784	0.358703
hsa-piR-29412	1.33562	0.404653	0.441753	0.916017	0.359658
hsa-piR-12545	0.417033	0.680587	0.743307	0.915619	0.359867
hsa-piR-22283	0.90926	-0.476015	0.519906	-0.915579	0.359888
hsa-piR-27665	0.38688	0.837295	0.914633	0.915444	0.359959
hsa-piR-31015	0.60392	-0.541384	0.592553	-0.913647	0.360902
hsa-piR-18848	1.37742	0.46255	0.50627	0.913643	0.360904
hsa-piR-5538	0.306973	0.825975	0.904165	0.913522	0.360968
hsa-piR-26958	3.11776	-0.330723	0.362073	-0.913415	0.361024
hsa-piR-19556	1.21301	-0.410268	0.449208	-0.913314	0.361077
hsa-piR-1613	71.1946	0.347067	0.380238	0.912764	0.361367	0.869445
hsa-piR-28828	0.785255	-0.471072	0.51636	-0.912295	0.361614
hsa-piR-31159	0.646999	0.594339	0.651482	0.912287	0.361618
hsa-piR-32846	0.506964	0.63001	0.691866	0.910595	0.362509
hsa-piR-2096	7.06179	-0.324085	0.355924	-0.910544	0.362536	0.869445
hsa-piR-14184	3.14267	-0.285427	0.313683	-0.909921	0.362864
hsa-miR-34b-3p	4.88475	-0.273934	0.301119	-0.909721	0.36297	0.869445
hsa-piR-22912	0.495804	-0.60734	0.66779	-0.909478	0.363098
5S_dup6_seq_710	18.4275	-0.246527	0.271529	-0.907923	0.363919	0.869445
hsa-piR-33115	0.451444	0.678859	0.747753	0.907866	0.363949
hsa-piR-7277	1.8189	0.377765	0.416224	0.907601	0.364089
hsa-miR-449c-5p	7.70491	-0.22199	0.244605	-0.907546	0.364118	0.869445
hsa-piR-27989	0.158355	-1.18857	1.31107	-0.906565	0.364637
hsa-piR-8982	10.0566	0.249647	0.275552	0.905988	0.364942	0.869445
hsa-piR-33145	0.373777	-0.729231	0.805566	-0.90524	0.365338
hsa-piR-9071	0.294886	-0.744213	0.822178	-0.905173	0.365374
hsa-piR-16532	1.34685	-0.414273	0.457696	-0.905128	0.365397
tRNA-Leu-AAG-2-3	17.8168	0.228716	0.25281	0.904697	0.365626	0.869445
hsa-piR-16191	14.0213	0.206456	0.228276	0.904417	0.365775	0.869445
hsa-piR-1263	4.00195	-0.264299	0.29227	-0.904297	0.365838	0.869445
hsa-miR-501-3p	1.59719	-0.362049	0.400414	-0.904186	0.365897
tRNA-Phe-GAA-1-1	14.3628	-0.236519	0.26174	-0.903642	0.366185	0.869445
hsa-piR-27334	1.38434	-0.355539	0.393544	-0.90343	0.366298
hsa-piR-13951	0.965176	-0.444356	0.492078	-0.903019	0.366516
hsa-piR-5569	1.90202	-0.342736	0.379617	-0.902846	0.366608
hsa-piR-16609	0.352153	-0.79067	0.876587	-0.901987	0.367064
hsa-piR-3449	0.661074	0.565825	0.627635	0.901519	0.367312
tRNA-Arg-ACG-2-3	2.58389	-0.275544	0.305714	-0.901312	0.367423
hsa-piR-16603	1.01023	0.486681	0.53998	0.901295	0.367431
hsa-piR-550	0.542358	-0.588308	0.653357	-0.900439	0.367887
hsa-piR-9311	2.55069	-0.281214	0.312314	-0.900422	0.367896
hsa-piR-19	2.15109	-0.36265	0.402771	-0.900389	0.367913
hsa-piR-8639	1.34369	-0.427156	0.474618	-0.899999	0.368121
hsa-piR-32026	3.57413	0.324188	0.3606	0.899024	0.36864
hsa-piR-15080	4.53236	-0.254702	0.283341	-0.898922	0.368694	0.872366
tRNA-Asp-GTC-2-5	657.649	-0.13534	0.150755	-0.897745	0.369322	0.872366
hsa-piR-3234	0.336824	0.883297	0.983911	0.89774	0.369324
hsa-piR-8097	9.56785	-0.23586	0.262888	-0.897187	0.369619	0.872366
hsa-piR-15858	3.80661	-0.271255	0.302522	-0.896646	0.369908
hsa-piR-8145	4.24866	-0.269955	0.301152	-0.896408	0.370035	0.872366
hsa-miR-195-5p	0.269835	-0.909765	1.01503	-0.896297	0.370094
hsa-piR-25348	0.854369	0.454747	0.508636	0.894052	0.371294
hsa-piR-19038	1.62589	-0.354738	0.39694	-0.893683	0.371491
hsa-piR-2828	11.8779	0.231605	0.259239	0.893404	0.371641	0.872378
hsa-piR-9184	0.329978	0.924942	1.03558	0.893163	0.37177
hsa-piR-9206	0.214303	-1.02361	1.14609	-0.89313	0.371787
hsa-piR-20057	1.22798	-0.421119	0.471524	-0.893101	0.371803
hsa-piR-5664	0.254106	0.966954	1.08276	0.893048	0.371831
hsa-piR-15957	0.640794	0.611746	0.685127	0.892894	0.371914
hsa-piR-10107	1.55002	-0.373105	0.417999	-0.892597	0.372073
hsa-piR-30326	0.772583	-0.457536	0.512723	-0.892365	0.372197
hsa-piR-17014	0.940035	-0.43531	0.487989	-0.892051	0.372366
hsa-piR-17490	0.378358	-0.760607	0.8532	-0.891475	0.372674
tRNA-Gln-TTG-3-3	145.417	0.222126	0.249204	0.891344	0.372744	0.872378
hsa-piR-10575	4.87406	-0.232125	0.26043	-0.891312	0.372762	0.872378
hsa-piR-24954	0.581308	-0.532687	0.598583	-0.889914	0.373512
hsa-piR-7066	14.392	-0.213251	0.239677	-0.88974	0.373605	0.872378
tRNA-Cys-GCA-9-1	45.1351	0.263061	0.295789	0.889351	0.373815	0.872378
hsa-piR-26453	8.6385	-0.21699	0.244066	-0.889061	0.37397	0.872378
LSU-rRNA_Hsa_dup3_seq_1433	0.383667	-0.650212	0.732365	-0.887825	0.374635
hsa-piR-28557	5.1812	-0.268127	0.302717	-0.885736	0.37576	0.875021
hsa-piR-20728	0.589752	0.548223	0.619296	0.885235	0.37603
LSU-rRNA_Hsa_dup10_seq_433	0.411138	0.6598	0.745608	0.884916	0.376202
hsa-piR-27912	2.37518	0.308239	0.34851	0.884447	0.376455
hsa-piR-26587	0.346442	-0.706418	0.798897	-0.884242	0.376566
hsa-piR-1495	1.15894	-0.41148	0.465457	-0.884034	0.376678
5S_dup17_seq_297	3.34034	0.281532	0.318583	0.883701	0.376858
hsa-piR-8126	1.16944	-0.430567	0.487398	-0.8834	0.37702
hsa-piR-733	0.23917	-0.85917	0.972768	-0.883223	0.377116
hsa-piR-27516	0.530166	-0.562902	0.637749	-0.882639	0.377431
hsa-piR-4606	0.39559	0.668637	0.757955	0.882158	0.377691
hsa-piR-24697	0.234065	-0.874397	0.991667	-0.881745	0.377915
hsa-piR-21551	0.301899	0.719264	0.815802	0.881665	0.377958
hsa-piR-22338	7.65325	-0.220936	0.250619	-0.88156	0.378015	0.875412
hsa-piR-8845	1.57654	-0.38041	0.431883	-0.880818	0.378416
hsa-piR-10227	98.654	-0.168976	0.191891	-0.880583	0.378544	0.875412
5S_dup21_seq_851	7.99341	0.239073	0.271544	0.88042	0.378632	0.875412
hsa-piR-9386	0.351563	-0.595767	0.676714	-0.880383	0.378652
hsa-piR-5012	0.51164	-0.663366	0.753651	-0.880203	0.378749
hsa-piR-8117	29.399	-0.175012	0.198848	-0.880127	0.37879	0.875412
hsa-piR-11983	0.582527	0.576488	0.655295	0.879737	0.379002
hsa-piR-25696	38.3738	-0.176781	0.201037	-0.879346	0.379214	0.875412
hsa-piR-2119	1.28962	-0.373339	0.424936	-0.878577	0.379631
hsa-piR-14512	3.79661	0.297195	0.338524	0.877913	0.379991
hsa-piR-30482	1.95153	-0.368342	0.419998	-0.877009	0.380482
hsa-piR-28447	0.772314	0.487846	0.556473	0.876675	0.380663
hsa-piR-668	1.5057	-0.337018	0.385074	-0.875203	0.381463
hsa-piR-21405	2.36336	-0.315484	0.361091	-0.873696	0.382284
hsa-piR-567	0.731428	-0.510566	0.584597	-0.873364	0.382465
hsa-piR-8200	0.418673	-0.677003	0.775197	-0.87333	0.382483
hsa-piR-3017	0.41463	-0.634386	0.726491	-0.87322	0.382543
hsa-piR-19203	0.329033	-0.753375	0.863467	-0.8725	0.382935
hsa-piR-13059	210.215	-0.172005	0.19715	-0.872456	0.38296	0.879662
tRNA-Arg-TCG-4-1	6.30407	-0.217275	0.249078	-0.872316	0.383036	0.879662
hsa-piR-4097	0.404274	-0.753779	0.864378	-0.872048	0.383182
hsa-piR-6465	2.01454	-0.296518	0.340101	-0.871852	0.383289
hsa-piR-24158	0.397141	0.69853	0.80141	0.871626	0.383412
SSU-rRNA_Hsa_seq_1424	0.942915	-0.515454	0.591595	-0.871296	0.383592
hsa-piR-25428	4.91746	-0.252496	0.290042	-0.870548	0.384001	0.879662
hsa-miR-31-5p	8.12562	-0.213869	0.245781	-0.870163	0.384211	0.879662
hsa-piR-10918	0.471686	0.674008	0.774622	0.870113	0.384239
hsa-piR-29214	3.90837	-0.268228	0.308345	-0.869897	0.384357	0.879662
hsa-piR-24723	0.84663	-0.428894	0.493488	-0.869107	0.384788
hsa-piR-2761	1.12054	-0.434596	0.500157	-0.86892	0.384891
hsa-piR-6732	2.54318	-0.315433	0.363509	-0.867745	0.385534
hsa-piR-10811	0.919601	-0.432176	0.498047	-0.867741	0.385536
hsa-piR-8935	0.947928	-0.395458	0.455913	-0.867398	0.385724
hsa-piR-13832	2.63679	-0.292641	0.338031	-0.865722	0.386643
5S_seq_880	1.03523	-0.402266	0.465099	-0.864904	0.387091
hsa-piR-323	0.316005	-0.697818	0.807033	-0.864671	0.38722
5S_dup59_seq_983	2.44639	-0.284189	0.328768	-0.864408	0.387364
hsa-piR-7435	1.30464	0.351269	0.406566	0.86399	0.387593
hsa-piR-3426	15.5447	-0.183097	0.211946	-0.863885	0.387651	0.88416
hsa-piR-13174	0.414961	0.652623	0.755787	0.863501	0.387862
hsa-piR-29354	6.26337	0.23076	0.267268	0.863403	0.387916	0.88416
hsa-piR-25847	1.22588	0.368333	0.426681	0.863252	0.387999
hsa-miR-454-3p	1.19414	-0.44741	0.518296	-0.863233	0.38801
hsa-piR-19282	43.1893	-0.174969	0.20282	-0.86268	0.388314	0.88416
hsa-piR-29920	0.197141	-0.864427	1.00227	-0.862469	0.388429
hsa-piR-3148	3.35279	-0.283873	0.329285	-0.862089	0.388639
hsa-piR-25689	0.304045	-0.801779	0.93092	-0.861276	0.389086
tRNA-Ile-TAT-3-1	0.417093	-0.582262	0.67613	-0.861168	0.389146
tRNA-Gln-CTG-12-1	0.855092	-0.480281	0.557894	-0.860881	0.389304
hsa-piR-3851	0.190768	-1.10002	1.27881	-0.860193	0.389682
5S_dup1_seq_1012	4.87287	0.280945	0.326691	0.859973	0.389804	0.884987
hsa-piR-14773	0.348718	0.689449	0.801841	0.859832	0.389882
tRNA-Glu-CTC-3-1	1.7981	-0.325159	0.378193	-0.859768	0.389917
hsa-piR-8308	0.597961	-0.50857	0.591952	-0.85914	0.390263
hsa-miR-125b-2-3p	2.93468	0.305243	0.355518	0.858586	0.390569
hsa-piR-26064	0.909667	0.534743	0.622852	0.858539	0.390595
hsa-piR-11084	6.34764	-0.220854	0.257264	-0.858475	0.39063	0.884987
hsa-piR-17044	10.5758	-0.18802	0.219035	-0.858403	0.39067	0.884987
hsa-piR-23954	1.38506	-0.432145	0.503476	-0.858323	0.390714
hsa-piR-5315	0.31056	0.742343	0.865514	0.85769	0.391064
hsa-piR-16353	0.201305	-0.826128	0.963683	-0.857261	0.391301
hsa-piR-17876	0.228684	-0.828114	0.96638	-0.856923	0.391487
5S_dup25_seq_935	1.84959	-0.423199	0.493945	-0.856775	0.391569
hsa-piR-20949	0.303319	0.767384	0.897396	0.855123	0.392483
hsa-piR-5144	0.972077	0.439416	0.514015	0.854869	0.392623
hsa-piR-23686	0.414658	-0.550964	0.644651	-0.85467	0.392734
hsa-piR-7237	1.31231	0.426382	0.498937	0.854581	0.392783
tRNA-Met-CAT-3-1	6.06797	0.204972	0.23994	0.854265	0.392958	0.887288
hsa-piR-23757	2.10838	-0.30302	0.354722	-0.854248	0.392968
hsa-piR-9569	0.787829	0.494218	0.579193	0.853287	0.3935
tRNA-Arg-CCT-3-1	12.8183	0.247043	0.28959	0.853081	0.393614	0.887288
hsa-piR-12505	0.736543	0.496783	0.582893	0.85227	0.394064
hsa-piR-22024	0.921492	-0.430177	0.504847	-0.852094	0.394162
hsa-piR-164	0.473899	0.613184	0.720401	0.85117	0.394675
hsa-miR-20a-5p	60.6739	-0.131485	0.154487	-0.851109	0.394709	0.887288
hsa-piR-16932	29.2581	-0.190747	0.224134	-0.851041	0.394746	0.887288
hsa-piR-21455	0.807599	0.47018	0.552519	0.850976	0.394782
hsa-piR-11988	2.59985	-0.33148	0.389633	-0.850748	0.394909
hsa-piR-30325	2.91902	-0.283927	0.334087	-0.849861	0.395403
5S_dup15_seq_1288	0.941427	-0.498653	0.586873	-0.849678	0.395504
hsa-piR-22377	2.6775	0.290027	0.341756	0.848638	0.396083
hsa-piR-24052	8.78993	-0.197572	0.232922	-0.848232	0.396309	0.887288
hsa-piR-13161	5.50089	0.233711	0.276088	0.846508	0.397269	0.887288
hsa-piR-24191	0.317328	-0.697432	0.82416	-0.846234	0.397422
tRNA-Ala-AGC-10-2	0.570405	-0.604539	0.714564	-0.846025	0.397539
hsa-piR-26998	3.06946	-0.255829	0.30241	-0.845967	0.397571
hsa-piR-13733	7.13838	-0.221431	0.261841	-0.845668	0.397738	0.887288
hsa-miR-450a-5p	0.660611	0.604397	0.714779	0.845571	0.397792
hsa-piR-19000	0.537485	0.536846	0.635288	0.845043	0.398087
hsa-piR-32938	53.4269	0.131369	0.155491	0.844869	0.398184	0.887288
hsa-piR-30641	1.58172	-0.345269	0.409089	-0.843995	0.398672
hsa-piR-13861	4.35686	-0.229464	0.272006	-0.843602	0.398892	0.887288
hsa-miR-28-3p	0.496466	0.594037	0.704243	0.843511	0.398943
hsa-piR-17160	0.746731	-0.484137	0.574063	-0.843352	0.399032
tRNA-Ser-GCT-4-1	34.6165	-0.199419	0.236547	-0.84304	0.399206	0.887288
hsa-piR-9928	2.10842	0.300823	0.356836	0.843028	0.399213
hsa-piR-16159	1.25431	0.41523	0.492587	0.842957	0.399253
hsa-piR-26245	3.26396	-0.271375	0.322133	-0.84243	0.399547
hsa-piR-33198	1.26053	0.403686	0.479323	0.8422	0.399676
hsa-piR-28928	17.8615	0.218696	0.259757	0.841924	0.399831	0.887288
hsa-piR-20289	0.34434	-0.686117	0.815417	-0.841431	0.400106
tRNA-Phe-GAA-1-5	13.4257	0.224165	0.266458	0.841279	0.400192	0.887288
hsa-piR-11681	0.454031	0.660057	0.784824	0.841025	0.400334
hsa-piR-16628	0.472958	-0.587255	0.698401	-0.840856	0.400428
hsa-miR-1307-5p	0.387438	0.758257	0.901806	0.84082	0.400449
hsa-piR-22429	9.60131	-0.194402	0.231282	-0.84054	0.400606	0.887288
hsa-piR-26918	1.1218	0.361558	0.430267	0.840312	0.400733
5S_dup76_seq_1002	0.384407	-0.572126	0.681046	-0.84007	0.400869
hsa-piR-31000	5.87167	0.226186	0.269869	0.838132	0.401957	0.887288
hsa-piR-14876	1.46123	-0.410296	0.489575	-0.838065	0.401994
hsa-piR-25213	0.205231	-1.00059	1.19419	-0.837879	0.402098
hsa-piR-10179	5.11042	-0.225628	0.269347	-0.837685	0.402208	0.887288
hsa-piR-20141	1.93854	0.340894	0.406958	0.837664	0.40222
hsa-piR-4543	1.37417	0.372219	0.444443	0.837496	0.402314
hsa-piR-28031	0.556748	-0.563394	0.672858	-0.837316	0.402415
hsa-piR-32994	4.81896	0.206434	0.24661	0.837084	0.402545	0.887288
hsa-piR-27806	0.301019	-0.621555	0.743266	-0.836248	0.403015
hsa-piR-29631	0.689307	0.505038	0.604448	0.835535	0.403417
5S_dup52_seq_1545	11.241	0.297549	0.356191	0.835365	0.403512	0.887288
hsa-piR-21902	2.83856	-0.266098	0.318648	-0.835084	0.40367
hsa-piR-5299	6.5366	0.214427	0.256845	0.834853	0.4038	0.887288
5S_dup27_seq_480	0.595675	-0.536406	0.642597	-0.834747	0.40386
hsa-piR-7293	0.905585	0.446148	0.534543	0.834635	0.403923
hsa-piR-22439	1.20392	-0.450748	0.540385	-0.834122	0.404212
hsa-piR-9447	0.845532	-0.466232	0.559399	-0.833451	0.40459
hsa-piR-19845	2.93999	-0.285696	0.343045	-0.832824	0.404944
5S_dup6_seq_638	19.3076	0.200208	0.240437	0.832687	0.405021	0.887288
hsa-piR-11701	0.475468	-0.59403	0.713542	-0.832508	0.405122
hsa-miR-664a-3p	0.695323	-0.555307	0.667131	-0.832381	0.405194
hsa-piR-5141	0.261722	-0.744667	0.894791	-0.832224	0.405282
hsa-piR-12947	0.750572	-0.433765	0.521271	-0.832128	0.405337
hsa-miR-4485-3p	7.94668	-0.184992	0.22251	-0.831389	0.405754	0.887288
hsa-piR-24161	0.422312	-0.566356	0.68132	-0.831262	0.405826
hsa-piR-15299	1.34162	0.403212	0.485403	0.830674	0.406158
LSU-rRNA_Hsa_dup5_seq_1510	1.97203	-0.302861	0.364784	-0.830246	0.4064
hsa-piR-32936	547.182	0.173537	0.209136	0.829779	0.406663	0.887288
hsa-piR-30597	1.70917	-0.370021	0.446114	-0.82943	0.406861
hsa-piR-25851	0.341938	-0.6907	0.83306	-0.829112	0.407041
hsa-piR-25199	0.329699	-0.73655	0.888625	-0.828865	0.407181
hsa-piR-9696	0.881444	-0.438685	0.529561	-0.828395	0.407447
hsa-piR-30559	0.451979	0.560854	0.677078	0.828344	0.407475
hsa-piR-7543	0.818926	-0.417952	0.504678	-0.828155	0.407583
hsa-piR-33079	1.94582	0.373171	0.450658	0.82806	0.407637
hsa-piR-15552	0.836788	0.517858	0.625863	0.827431	0.407993
hsa-piR-21930	1.23051	-0.333094	0.402758	-0.827032	0.408219
LSU-rRNA_Hsa_dup1_seq_674	72.5274	-0.18737	0.22656	-0.82702	0.408226	0.887288
hsa-piR-487	3.5136	-0.244726	0.296109	-0.826473	0.408536
hsa-piR-9433	7.05707	-0.25094	0.303745	-0.826153	0.408717	0.887288
hsa-piR-7366	0.546097	-0.511356	0.619143	-0.825909	0.408856
tRNA-Phe-GAA-1-6	13.7149	0.216345	0.262335	0.824687	0.409549	0.887288
hsa-piR-25214	5.58342	-0.234764	0.284941	-0.823903	0.409995	0.887288
hsa-piR-7630	0.72855	-0.511295	0.620754	-0.823668	0.410128
hsa-piR-17432	3.57253	-0.28032	0.340636	-0.822931	0.410547
hsa-miR-652-3p	2.89296	-0.319459	0.388365	-0.822574	0.410751
hsa-piR-5646	0.56996	-0.515084	0.626593	-0.822039	0.411055
hsa-piR-9798	3.06415	0.278023	0.338226	0.822002	0.411075
hsa-piR-28218	1.06904	-0.417488	0.507979	-0.821861	0.411156
hsa-piR-29230	0.16258	-1.00508	1.22333	-0.82159	0.41131
hsa-piR-27044	0.541696	-0.501883	0.611057	-0.821336	0.411455
hsa-piR-2201	9.31751	0.239561	0.291725	0.821189	0.411539	0.887288
hsa-piR-10665	1.08293	-0.582374	0.709362	-0.820984	0.411656
hsa-piR-25192	1.33448	0.385204	0.469561	0.820349	0.412017
hsa-piR-7362	6.4822	0.272513	0.332272	0.820152	0.41213	0.887288
hsa-piR-169	5.21186	-0.223821	0.27299	-0.819885	0.412282	0.887288
tRNA-Gly-GCC-1-4	6936.04	0.224369	0.273699	0.819765	0.41235	0.887288
hsa-piR-26570	5.92752	-0.269654	0.329092	-0.819388	0.412565	0.887288
hsa-piR-4044	0.517309	0.553506	0.675761	0.819086	0.412737
hsa-piR-5701	1.70314	0.384697	0.469768	0.818908	0.412839
hsa-miR-135b-5p	0.845945	0.450887	0.55067	0.818796	0.412903
hsa-piR-5184	0.55667	-0.498502	0.608949	-0.818626	0.413
hsa-piR-14374	0.471474	0.568253	0.694159	0.818621	0.413003
hsa-piR-10507	0.47672	-0.55763	0.681436	-0.818317	0.413176
hsa-piR-16106	0.404169	-0.614312	0.751711	-0.817218	0.413804
hsa-piR-23454	0.437624	0.632918	0.774926	0.816746	0.414073
hsa-piR-19671	1.41188	-0.383408	0.469519	-0.816597	0.414159
hsa-piR-7638	0.328258	0.69739	0.85421	0.816416	0.414262
hsa-piR-8412	0.97298	-0.368996	0.452031	-0.816306	0.414325
hsa-piR-10562	0.522627	-0.59999	0.735251	-0.816034	0.414481
hsa-piR-6777	11.5145	0.243602	0.298815	0.815227	0.414942	0.887288
hsa-piR-17394	0.651701	-0.489931	0.600975	-0.815227	0.414943
hsa-piR-23677	0.704846	-0.489527	0.600567	-0.815108	0.41501
hsa-piR-29971	4.74721	-0.235421	0.288867	-0.81498	0.415083	0.887288
hsa-piR-12033	0.515337	-0.527342	0.647559	-0.814354	0.415442
hsa-piR-29252	0.234351	0.852218	1.04697	0.813984	0.415654
hsa-piR-30850	3.10681	0.243768	0.299738	0.813272	0.416062
hsa-piR-4771	4.63443	0.257753	0.316945	0.813243	0.416079	0.887288
hsa-piR-12128	54.9433	-0.162433	0.199977	-0.812256	0.416645	0.887288
hsa-piR-22487	0.29133	-0.640061	0.788012	-0.812247	0.41665
hsa-piR-23065	5.81305	0.250213	0.308369	0.811408	0.417131	0.887288
hsa-piR-9968	0.335381	-0.680232	0.838511	-0.811237	0.417229
hsa-piR-9151	10.6041	-0.204359	0.252016	-0.810896	0.417425	0.887288
hsa-piR-23166	0.522732	-0.588487	0.725994	-0.810594	0.417599
hsa-piR-8252	6.98298	-0.218091	0.26923	-0.810051	0.417911	0.887288
hsa-piR-8808	32.1621	-0.188871	0.233193	-0.809931	0.41798	0.887288
hsa-piR-15224	0.321384	0.644444	0.795722	0.809886	0.418006
hsa-piR-30844	72.4354	0.150353	0.185647	0.809882	0.418008	0.887288
hsa-piR-29894	1.95443	-0.29056	0.358788	-0.809839	0.418033
hsa-piR-2485	2.83607	-0.267816	0.330887	-0.809388	0.418292
hsa-piR-10341	6.68657	0.200443	0.247699	0.809219	0.418389	0.887288
tRNA-Asp-GTC-4-1	22.6471	-0.145042	0.179471	-0.808162	0.418997	0.887288
hsa-miR-29b-1-5p	0.413425	0.599611	0.742466	0.807594	0.419324
hsa-piR-24506	0.696328	-0.461353	0.571371	-0.80745	0.419407
hsa-piR-30152	2.41078	-0.269746	0.334607	-0.806158	0.420152
hsa-piR-15708	0.616078	0.513749	0.63746	0.805932	0.420282
hsa-piR-30138	0.631276	-0.46128	0.57248	-0.805757	0.420383
hsa-piR-31624	0.4923	-0.514562	0.639011	-0.805247	0.420677
hsa-piR-5081	2.89354	0.242811	0.301655	0.804928	0.420861
hsa-piR-23024	1.86568	-0.295546	0.367375	-0.804479	0.42112
hsa-piR-8528	2.45388	-0.250101	0.311423	-0.803092	0.421922
hsa-piR-28138	3.93855	0.238193	0.296665	0.802902	0.422031	0.892295
hsa-piR-23395	0.428249	-0.584181	0.727614	-0.802872	0.422049
hsa-piR-2169	0.747505	-0.459203	0.572117	-0.802639	0.422184
hsa-piR-22995	1.98349	0.31707	0.39511	0.802486	0.422272
hsa-piR-19230	0.317466	0.654783	0.816029	0.802402	0.422321
hsa-piR-9462	1.51603	0.332677	0.414662	0.802283	0.422389
5S_dup41_seq_531	0.161548	-1.15991	1.44665	-0.801789	0.422675
hsa-piR-24404	0.403947	0.696596	0.868874	0.801722	0.422714
hsa-piR-28143	0.590445	-0.544387	0.6791	-0.801629	0.422768
tRNA-Phe-GAA-4-1	1.19986	-0.377429	0.470841	-0.801606	0.422781
hsa-piR-5518	0.443206	-0.605556	0.755478	-0.801554	0.422811
hsa-piR-9016	0.879514	-0.422418	0.527124	-0.801363	0.422921
hsa-piR-28824	13.4382	0.172993	0.215909	0.801232	0.422997	0.89292
hsa-piR-31464	0.340035	-0.68741	0.858892	-0.800345	0.423511
hsa-piR-7461	1.93192	0.305806	0.382165	0.800194	0.423598
hsa-piR-16374	3.0426	-0.238718	0.298378	-0.800053	0.42368
hsa-piR-4008	0.907714	-0.428144	0.535386	-0.799692	0.423889
hsa-piR-10014	0.291364	-0.685916	0.858001	-0.799435	0.424038
hsa-piR-4229	1.93321	-0.29541	0.369569	-0.799337	0.424095
LSU-rRNA_Hsa_dup2_seq_415	0.375468	-0.564141	0.705995	-0.799072	0.424249
hsa-miR-513c-3p	0.159375	-1.10581	1.38464	-0.798631	0.424504
hsa-piR-103	0.775448	-0.413043	0.517346	-0.798389	0.424645
hsa-piR-4710	11.7434	-0.195045	0.244343	-0.798243	0.42473	0.895158
hsa-piR-12379	0.344825	-0.573309	0.718634	-0.797776	0.425001
hsa-piR-5106	0.886524	-0.413647	0.518707	-0.797458	0.425185
hsa-piR-16416	0.641794	-0.451661	0.566607	-0.797133	0.425374
hsa-piR-17590	0.246658	-0.866338	1.08717	-0.796875	0.425524
hsa-piR-26603	10.6455	-0.245447	0.308156	-0.796502	0.42574	0.89587
hsa-piR-1540	3.29896	-0.26518	0.333141	-0.796001	0.426031
hsa-piR-18429	1.81384	-0.301456	0.378898	-0.795613	0.426257
hsa-piR-11422	0.670163	0.477938	0.601456	0.794636	0.426825
LSU-rRNA_Hsa_seq_1356	1.09335	-0.359081	0.45223	-0.794022	0.427183
hsa-piR-20806	3.39945	-0.254873	0.32118	-0.793552	0.427457
hsa-piR-1151	2.37189	-0.302425	0.381182	-0.793388	0.427552
hsa-piR-32828	6.96436	0.250382	0.315911	0.792571	0.428028	0.899263
hsa-piR-4016	0.639729	-0.444522	0.561006	-0.792365	0.428148
hsa-piR-19093	0.748069	-0.394998	0.498881	-0.791767	0.428497
hsa-piR-14397	0.226222	-0.72911	0.920989	-0.79166	0.428559
hsa-piR-16243	0.295705	-0.632237	0.798665	-0.791618	0.428584
hsa-piR-21122	1.47699	0.337265	0.426298	0.79115	0.428857
hsa-piR-7302	10.5998	-0.191425	0.242007	-0.790991	0.428949	0.899714
hsa-piR-6556	2.51152	-0.273321	0.34559	-0.790883	0.429012
hsa-piR-6301	0.80192	-0.414356	0.523942	-0.790842	0.429036
hsa-piR-13098	0.218222	0.82492	1.0433	0.790682	0.429129
hsa-piR-31116	1.68651	-0.288158	0.364606	-0.790328	0.429336
hsa-piR-16641	0.914971	-0.434903	0.55115	-0.789083	0.430064
hsa-piR-12215	1.6662	0.41552	0.526678	0.788945	0.430144
hsa-piR-33013	10733.1	0.141925	0.179903	0.788897	0.430172	0.899714
hsa-piR-19104	7.68522	0.210993	0.26751	0.788732	0.430269	0.899714
hsa-piR-7571	0.691106	-0.451142	0.572109	-0.788561	0.430369
tRNA-Met-CAT-4-2	0.594884	0.494655	0.627338	0.788498	0.430405
hsa-piR-2836	2.13082	0.315582	0.400635	0.787704	0.43087
hsa-piR-9274	2.32642	-0.284416	0.361152	-0.787524	0.430975
hsa-miR-1248	1.28005	0.433418	0.550973	0.786642	0.431492
hsa-miR-28-5p	6.12882	-0.294143	0.374257	-0.785939	0.431903	0.901716
tRNA-Ala-AGC-14-2	0.353972	-0.615525	0.783369	-0.785741	0.432019
hsa-piR-12765	0.391628	0.655376	0.83415	0.785681	0.432054
hsa-piR-19224	1.22825	0.402678	0.513044	0.784879	0.432524
hsa-piR-14775	6.27466	-0.211746	0.270075	-0.784027	0.433024	0.902324
hsa-piR-113	1.6025	-0.290866	0.371398	-0.783166	0.43353
tRNA-Lys-TTT-4-1	6604.86	0.194027	0.247758	0.783133	0.433549	0.902324
hsa-piR-26404	0.344863	-0.548248	0.700547	-0.782599	0.433863
hsa-piR-8852	0.719414	0.415368	0.53159	0.78137	0.434585
hsa-piR-19280	8.14642	-0.225687	0.288894	-0.78121	0.434679	0.90282
hsa-piR-8678	0.584121	-0.481566	0.618183	-0.779002	0.435979
hsa-piR-28797	7.60995	-0.22273	0.285961	-0.778882	0.436049	0.90282
hsa-miR-1-3p	0.202205	-0.786174	1.00979	-0.77855	0.436245
hsa-piR-29861	16.6901	-0.175028	0.224877	-0.778327	0.436376	0.90282
hsa-piR-14435	0.830115	-0.402976	0.5178	-0.778246	0.436424
tRNA-Lys-TTT-3-5	2804.62	0.272447	0.350135	0.77812	0.436498	0.90282
hsa-piR-10542	1.95219	-0.309433	0.397857	-0.777749	0.436717
hsa-piR-18754	2.86162	0.268819	0.345717	0.77757	0.436823
hsa-piR-11320	0.174196	-0.955252	1.22891	-0.777316	0.436972
hsa-piR-9864	1.51628	0.342164	0.440333	0.777057	0.437125
tRNA-SeC-TCA-3-1	0.249379	0.737079	0.949683	0.776132	0.437671
hsa-piR-18327	0.320822	-0.641625	0.826997	-0.775849	0.437838
hsa-miR-1296-5p	0.219765	-0.71707	0.924312	-0.775788	0.437874
hsa-piR-30706	0.813206	-0.447448	0.577031	-0.775432	0.438084
hsa-miR-141-3p	1.40726	0.389229	0.502197	0.775052	0.438309
hsa-piR-20786	0.249922	0.720157	0.929804	0.774526	0.43862
hsa-piR-10736	9.69526	0.202683	0.261791	0.774216	0.438803	0.903849
hsa-piR-1599	6.9151	0.216244	0.279383	0.774006	0.438928	0.903849
hsa-piR-26392	0.372356	-0.544324	0.703413	-0.773833	0.43903
hsa-piR-30957	7.56038	-0.19364	0.250237	-0.773829	0.439032	0.903849
hsa-piR-29790	0.765017	0.4866	0.629996	0.772386	0.439886
hsa-piR-8205	3.82028	0.237002	0.307004	0.771982	0.440125
hsa-piR-10020	0.577662	0.477531	0.618604	0.771949	0.440145
hsa-piR-14651	6.66923	0.205427	0.26612	0.771934	0.440154	0.90476
hsa-piR-18828	0.724782	0.49849	0.646114	0.771521	0.440398
hsa-piR-14830	1.48521	-0.313989	0.40716	-0.771169	0.440607
hsa-miR-29c-5p	1.06179	0.390394	0.506286	0.771094	0.440651
hsa-piR-17843	1.25078	-0.357964	0.464316	-0.77095	0.440737
hsa-piR-32965	17.1116	-0.222703	0.289077	-0.770396	0.441065	0.905046
hsa-piR-11546	0.818237	0.427743	0.55532	0.770263	0.441144
hsa-piR-19094	1.4268	0.332818	0.432187	0.770078	0.441253
hsa-piR-26269	4.11217	0.219729	0.285582	0.769407	0.441652	0.905046
hsa-piR-7979	0.882969	-0.385966	0.502017	-0.768831	0.441994
hsa-piR-578	3.72584	0.255886	0.333014	0.768392	0.442254
hsa-piR-28569	1.26815	0.342685	0.446278	0.767873	0.442563
hsa-piR-18896	2.57836	0.258645	0.336904	0.767711	0.442659
5S_dup17_seq_1199	0.43512	0.540983	0.704756	0.767618	0.442714
hsa-piR-23513	0.261438	-0.735646	0.959084	-0.76703	0.443064
hsa-piR-14660	0.339743	0.744248	0.970445	0.766914	0.443132
LSU-rRNA_Hsa_dup12_seq_53	0.541139	0.502509	0.655646	0.766434	0.443418
hsa-miR-944	0.356862	-0.563775	0.735669	-0.766343	0.443472
hsa-piR-14571	1.63994	0.307782	0.40171	0.766179	0.44357
hsa-piR-30914	0.366553	0.720873	0.942829	0.764584	0.444519
hsa-miR-345-5p	0.295719	-0.630422	0.824569	-0.764548	0.444541
hsa-piR-3097	6.12868	0.21267	0.278182	0.764499	0.44457	0.90706
hsa-piR-13778	0.349797	0.702789	0.919525	0.764295	0.444691
hsa-piR-27128	0.761633	0.432237	0.565682	0.764099	0.444808
hsa-piR-17182	5.80438	0.189272	0.247709	0.764092	0.444812	0.90706
hsa-piR-18421	0.309602	0.694147	0.908513	0.764047	0.444839
hsa-miR-515-5p	1.15356	0.47293	0.619034	0.76398	0.444879
5S_dup46_seq_1078	0.340322	-0.674499	0.882898	-0.763961	0.444891
hsa-piR-18137	2.4139	0.292646	0.383101	0.763887	0.444934
hsa-piR-29101	1.90425	-0.283012	0.370795	-0.763256	0.445311
hsa-piR-11350	2.52239	-0.277312	0.363358	-0.763191	0.445349
5S_dup12_seq_151	0.241022	-0.741547	0.971944	-0.762952	0.445492
hsa-piR-26454	0.936612	0.419652	0.550183	0.762749	0.445613
hsa-piR-5908	4.69784	0.222292	0.291625	0.762255	0.445908	0.90706
hsa-piR-31937	0.448102	-0.56758	0.744641	-0.76222	0.445929
hsa-piR-32911	6.64275	-0.16026	0.210301	-0.762048	0.446031	0.90706
hsa-piR-21720	1.35265	-0.345381	0.453439	-0.761692	0.446244
hsa-piR-21379	5.05759	-0.1849	0.242752	-0.761682	0.44625	0.90706
hsa-piR-31135	0.402722	-0.538376	0.706941	-0.761557	0.446324
hsa-piR-10756	0.443418	0.570934	0.750317	0.760923	0.446703
hsa-miR-372-3p	6.06902	-0.176798	0.232356	-0.760894	0.44672	0.90706
hsa-piR-22268	3.53163	0.245383	0.322758	0.760271	0.447093
5S_dup74_seq_1166	0.930525	-0.414627	0.545435	-0.760177	0.447149
hsa-piR-25027	1.25166	-0.43684	0.574855	-0.759914	0.447306
hsa-piR-3718	0.381297	-0.55171	0.726459	-0.759451	0.447583
hsa-piR-10336	0.378163	-0.50178	0.660818	-0.759331	0.447654
5S_dup79_seq_103	0.806485	-0.397165	0.523241	-0.759047	0.447824
hsa-piR-27215	0.242541	-0.752484	0.992934	-0.757839	0.448547
hsa-miR-2110	1.11817	-0.331167	0.437728	-0.756558	0.449315
hsa-piR-5675	5.13194	0.197492	0.261052	0.756522	0.449337	0.909961
hsa-piR-1381	5.63279	0.219778	0.290626	0.756223	0.449515	0.909961
hsa-piR-33055	2.60662	0.297972	0.394188	0.755912	0.449702
hsa-piR-13506	1.17307	-0.36434	0.482114	-0.755713	0.449821
hsa-piR-15198	0.813009	-0.404955	0.535999	-0.755515	0.44994
hsa-piR-13518	0.985931	-0.416466	0.551785	-0.754762	0.450392
hsa-piR-29283	0.84537	-0.396951	0.526029	-0.754617	0.450479
hsa-piR-25463	224.104	-0.150343	0.199253	-0.754532	0.45053	0.910631
hsa-miR-494-3p	0.725973	-0.505399	0.669824	-0.754524	0.450534
hsa-piR-23257	0.699255	0.494912	0.656002	0.754437	0.450587
hsa-piR-22294	0.201646	-0.73749	0.977637	-0.75436	0.450633
hsa-piR-20575	1.37967	-0.350327	0.464563	-0.7541	0.450789
hsa-piR-13007	0.597822	-0.484053	0.642049	-0.753919	0.450898
hsa-piR-3061	0.425034	0.630404	0.836549	0.753577	0.451104
hsa-piR-6811	2.92459	-0.258484	0.343164	-0.753237	0.451307
hsa-piR-21415	0.361298	0.623594	0.827927	0.7532	0.45133
hsa-piR-13233	0.22	0.763293	1.01347	0.753151	0.451359
hsa-piR-22227	0.839137	0.462376	0.614259	0.752738	0.451607
hsa-piR-4502	0.563041	-0.505857	0.672205	-0.752534	0.45173
hsa-piR-16247	0.356056	-0.557185	0.740487	-0.752457	0.451776
hsa-piR-547	1.0842	-0.325541	0.433899	-0.750268	0.453093
hsa-piR-23780	0.311997	0.591737	0.788847	0.750129	0.453177
hsa-piR-25255	0.39886	-0.619983	0.826712	-0.749939	0.453292
hsa-piR-5478	0.653108	0.531973	0.709632	0.749647	0.453468
hsa-piR-21710	4.62456	0.234648	0.313036	0.749589	0.453503	0.913984
hsa-piR-5136	1.52543	-0.32134	0.428705	-0.749559	0.453521
hsa-piR-15360	0.265349	0.704895	0.94063	0.749387	0.453624
hsa-miR-4705	0.176789	0.809425	1.08028	0.749273	0.453693
hsa-piR-757	0.370984	-0.596916	0.796751	-0.749188	0.453744
5S_dup2_seq_139	0.725902	-0.405984	0.542006	-0.74904	0.453833
hsa-piR-7198	0.726132	0.461624	0.616434	0.748863	0.45394
hsa-piR-19762	1.50611	-0.346004	0.462057	-0.748834	0.453957
hsa-piR-14959	1.20913	-0.339688	0.453821	-0.748506	0.454155
hsa-piR-6114	1.09939	0.369628	0.494177	0.747967	0.45448
hsa-piR-7649	0.188759	-0.76331	1.02096	-0.747641	0.454677
5S_dup11_seq_918	10.1156	-0.180769	0.241896	-0.747302	0.454881	0.913984
hsa-miR-509-3p	19.5007	0.176478	0.236315	0.746788	0.455191	0.913984
hsa-piR-14102	16.5265	-0.177695	0.237961	-0.746737	0.455222	0.913984
hsa-miR-24-3p	7.61998	0.286436	0.383922	0.746079	0.45562	0.913984
hsa-piR-28587	0.347743	-0.556238	0.745752	-0.745875	0.455743
hsa-piR-10721	0.255767	-0.72255	0.968919	-0.745728	0.455832
hsa-piR-2008	0.533723	0.499598	0.670305	0.74533	0.456072
hsa-miR-769-3p	0.168025	-0.967881	1.2988	-0.745214	0.456142
hsa-piR-16163	0.319448	-0.589988	0.791924	-0.745006	0.456268
5S_dup7_seq_216	0.334112	-0.649016	0.87154	-0.744677	0.456467
hsa-piR-3004	4.77379	-0.233492	0.314105	-0.743358	0.457265	0.914728
hsa-piR-29188	0.299407	0.66525	0.894927	0.743357	0.457266
hsa-piR-16344	2.69357	0.250377	0.336918	0.743139	0.457398
hsa-piR-27240	0.969659	-0.351064	0.473231	-0.741845	0.458182
hsa-piR-22347	1.97468	-0.242564	0.327138	-0.741472	0.458407
hsa-piR-28339	5.35655	-0.20369	0.274849	-0.741098	0.458634	0.914728
5S_dup48_seq_1240	269.408	-0.153145	0.206649	-0.741087	0.458641	0.914728
hsa-piR-10353	0.242358	0.80876	1.0915	0.740959	0.458718
hsa-piR-15526	1.13568	-0.382341	0.516049	-0.740901	0.458754
hsa-piR-1139	0.317384	-0.671829	0.907209	-0.740544	0.45897
hsa-piR-32151	1.50304	-0.278955	0.37675	-0.740424	0.459043
hsa-piR-9736	14.3809	-0.189281	0.255836	-0.739852	0.45939	0.914728
hsa-piR-28671	4.13099	0.215175	0.290857	0.739795	0.459424	0.914728
hsa-piR-17909	0.429872	0.563049	0.761089	0.739794	0.459425
hsa-piR-20017	0.583699	-0.558053	0.754396	-0.739735	0.459461
hsa-piR-26249	1.90876	-0.282161	0.3815	-0.73961	0.459537
hsa-piR-4926	1.82724	-0.290868	0.39356	-0.739069	0.459865
hsa-piR-12952	1.40192	0.310193	0.419768	0.738961	0.45993
hsa-piR-21086	1.31805	-0.358649	0.485348	-0.738951	0.459937
hsa-piR-13000	0.480004	0.558514	0.756057	0.73872	0.460077
hsa-piR-29742	11.2495	-0.146649	0.198606	-0.738389	0.460278	0.915061
hsa-piR-17714	3.72713	-0.233202	0.315998	-0.737985	0.460523
hsa-piR-21580	0.392329	-0.524484	0.710767	-0.737912	0.460568
hsa-piR-30586	0.655172	0.450501	0.610535	0.737879	0.460588
5S_dup118_seq_125	2.33136	0.288188	0.39076	0.737505	0.460815
hsa-piR-2187	5.0377	0.218806	0.296811	0.737189	0.461008	0.915145
hsa-piR-16192	0.786611	-0.403626	0.547541	-0.73716	0.461025
hsa-piR-5264	0.895589	-0.359516	0.488108	-0.73655	0.461396
hsa-miR-190a-5p	0.297855	-0.640377	0.8695	-0.736489	0.461433
tRNA-Tyr-GTA-6-1	0.410982	-0.583624	0.792458	-0.736472	0.461443
hsa-piR-30168	0.315452	-0.628963	0.854037	-0.736458	0.461452
hsa-piR-720	0.195596	-0.82439	1.11947	-0.736413	0.461479
hsa-piR-6600	0.212028	-0.880303	1.19541	-0.736405	0.461484
hsa-piR-3761	0.243034	-0.853823	1.15957	-0.736326	0.461532
hsa-piR-824	1.65788	-0.26823	0.364434	-0.736016	0.461721
hsa-piR-7369	4.26451	-0.230103	0.312714	-0.735826	0.461836	0.915426
hsa-piR-7704	2.68975	0.244701	0.332809	0.735258	0.462182
hsa-piR-30418	0.220379	-0.803862	1.09422	-0.734647	0.462555
5S_dup67_seq_1265	5.54659	-0.203029	0.276416	-0.734505	0.462641	0.915659
hsa-piR-17358	0.213154	-0.85249	1.16134	-0.734056	0.462915
hsa-piR-25243	0.550934	-0.426742	0.581422	-0.733963	0.462971
hsa-piR-24702	0.767197	-0.382203	0.520794	-0.733884	0.463019
hsa-piR-5347	1.90197	-0.294811	0.401981	-0.733394	0.463318
hsa-piR-26601	7.19255	-0.197837	0.269847	-0.733145	0.46347	0.915938
hsa-piR-23698	0.406319	-0.572429	0.780916	-0.733023	0.463545
hsa-piR-6738	0.460529	-0.490279	0.668867	-0.732998	0.46356
hsa-miR-517b-3p	0.23948	-0.627482	0.85616	-0.732903	0.463618
hsa-piR-15007	0.782856	-0.386531	0.527421	-0.73287	0.463637
hsa-piR-12235	0.388014	-0.573118	0.78218	-0.732719	0.46373
hsa-piR-9207	1.0667	0.376219	0.514214	0.731639	0.464389
hsa-piR-17345	0.77635	0.480434	0.65687	0.731399	0.464536
hsa-piR-10185	0.975206	-0.336661	0.46034	-0.731331	0.464577
hsa-piR-2915	9.96901	-0.186712	0.255345	-0.731212	0.46465	0.916909
hsa-piR-24270	0.91508	0.416709	0.569889	0.731211	0.46465
hsa-piR-18933	0.255588	-0.773131	1.05796	-0.730776	0.464916
hsa-piR-28844	2.04751	-0.255965	0.350423	-0.730447	0.465117
hsa-piR-24196	1.01608	-0.352694	0.482927	-0.730325	0.465192
hsa-piR-5223	1.63485	-0.291343	0.399382	-0.729486	0.465704
hsa-piR-14696	1.51397	0.343488	0.471206	0.728955	0.466029
hsa-piR-12156	0.316827	-0.575718	0.790007	-0.728751	0.466154
hsa-piR-18555	0.357671	0.668493	0.918236	0.728018	0.466602
hsa-piR-16444	0.431913	0.559604	0.768718	0.72797	0.466632
hsa-piR-32910	3.02126	0.264919	0.364237	0.727325	0.467027
hsa-piR-33109	0.320321	-0.61879	0.851204	-0.726958	0.467252
hsa-piR-1318	0.216897	-0.843907	1.1618	-0.726378	0.467607
hsa-piR-21618	0.246282	0.673473	0.928128	0.725625	0.468068
hsa-piR-12405	4.90203	0.241303	0.332615	0.725471	0.468163	0.921724
hsa-piR-17713	1.34224	-0.311292	0.429367	-0.725001	0.468452
hsa-piR-33047	58.5909	-0.118669	0.16369	-0.724964	0.468474	0.921724
hsa-piR-24407	0.844167	-0.37699	0.520416	-0.724401	0.468819
hsa-piR-2309	0.4802	-0.514458	0.710251	-0.724333	0.468861
hsa-piR-15000	0.385358	0.59038	0.815419	0.72402	0.469053
hsa-miR-493-5p	0.22531	-0.667017	0.921508	-0.723833	0.469168
hsa-piR-17648	0.31552	0.625322	0.864008	0.723746	0.469222
5S_dup45_seq_535	0.236277	-0.877131	1.21208	-0.723655	0.469277
5S_dup33_seq_47	0.250657	0.725975	1.00322	0.723645	0.469284
hsa-piR-18906	1.01299	0.479565	0.663004	0.723321	0.469483
hsa-piR-2380	5.41898	-0.193352	0.267366	-0.723171	0.469575	0.922368
hsa-piR-29248	0.323837	0.585395	0.809559	0.723104	0.469616
hsa-piR-15471	0.292083	0.674509	0.933159	0.722824	0.469788
hsa-piR-8857	5.17946	-0.209013	0.289421	-0.722176	0.470186	0.922368
hsa-piR-175	0.293945	0.609637	0.844226	0.722125	0.470218
hsa-piR-7686	0.429165	-0.53924	0.74701	-0.721865	0.470377
hsa-piR-28104	0.363998	0.664639	0.920837	0.721777	0.470431
hsa-piR-1382	0.816991	-0.440991	0.611227	-0.721485	0.470611
hsa-piR-27337	3.52189	-0.228614	0.316903	-0.7214	0.470664
hsa-piR-10529	0.417275	0.543849	0.75435	0.720951	0.47094
hsa-piR-21640	0.307314	-0.66356	0.920536	-0.720841	0.471007
hsa-piR-17100	1.42118	-0.289845	0.402399	-0.720292	0.471345
hsa-piR-29142	1.22331	0.384724	0.534511	0.719767	0.471669
hsa-miR-331-3p	0.263654	-0.635983	0.883644	-0.719727	0.471693
hsa-piR-15997	1.46694	0.406542	0.564868	0.719713	0.471702
hsa-piR-11091	0.193893	-0.848696	1.17947	-0.71956	0.471796
hsa-miR-34a-5p	1.6879	-0.301616	0.419601	-0.718817	0.472254
hsa-piR-8208	4.11597	-0.234126	0.325717	-0.718801	0.472263	0.92243
hsa-piR-6190	14.2787	0.151119	0.21051	0.717874	0.472835	0.92243
[truncated: 16,766 more rows]

[truncated: 5 more sheets: Table S11 tsRNA Hua, ITAS, Table S12 sRNA Ingerslev, SPOR, Table S13 tsRNA Ingerslev, SPO, Table S14 sRNA Ingerslev, ITAS, Table S15 tsRNA Ingerslev, ITA]
